# Supplementary material
Source: HighWire-hosted journal article supplement (https://jitc.bmj.com/content/8/2/e001591)
Supplement: inline-supplementary-material-5 [file inline-supplementary-material-5.xlsx]

## Sheet: TrackRearrangements_11-04-2019_
Amino Acid	Sum (Productive Frequency)	Present In	mel2-blood-pre	mel2-blood-post1	mel2-blood-post2	Mel2 blood year later	nektar pre	nektar on	clone	mel2-capg-8+	mel2-capg-8-	mel2-cpag-4+	mel2-cpag-4-	mel2-cpag-s1	mel2-cpag-s2	mel2-gp100-4+	mel2-gp100-4-	mel2-gp100-8+	mel2-gp100-8-	mel2-gp100-s1	mel2-gp100-s2	mel2-mag-8+	mel2-mage-4+	mel2-mage-4-	mel2-mage-8-	mel2-mage-s1	mel2-mage-s2	mel2-mart-4+	mel2-mart-4-	mel2-mart-8+	mel2-mart-8-	mel2-mart-s1	mel2-mart-s2	mel2-nacc-4+	mel2-nacc-8+	mel2-nacc-8-	mel2-nacc-cd4-	mel2-nacc-pretx-stim	mel2-nacc-s1	mel2-nacc-s2	mel2-neg-s1	mel2-neg-s2	mel2-prame-4+	mel2-prame-4-	mel2-prame-8+	mel2-prame-8-	mel2-prame-s1	mel2-prame-s2	mel2-slc-4+
CASSTGLYEQYF	0.0349933	8	0	0	6.7e-06	0	0.000159674	0.000118045	nacc8	0	0	0	0	0	1.043e-05	0	0	0	0	0	0	0	0	0	0	0	0	0	0	0	0	0	0	0.00228311	0.0248963	0	0	0.00119045	0	0.00628008	0	0	0	0	0	0	0	0	0
CASSVGLYEQYF	0.040852	4	0	0	0	0	4.91304e-05	0	nacc8	0	0	0	0	0	0	0	0	0	0	0	0	0	0	0	0	0	0	0	0	0	0	0	0	0.00228311	0.0238589	0.00716846	0	0	0.00754148	0	0	0	0	0	0	0	0	0	0
CASAGGVGYEQYF	0.0309604	5	0	0	0	0	0	0	nacc8	0	0	0	0	0	0	0	0	0	0	0	0	0	0	0	0	0	0	0	0	0	0	0	0	0.00228311	0.0217842	0.00358423	0	0	0.00328593	2.292e-05	0	0	0	0	0	0	0	0	0
CASSPGLYEQYF	0.127973	16	2.044e-05	3.489e-05	2.009e-05	8.17e-06	0.000257935	0.000489044	nacc8	0	0	0	0	0	0	0	0	0	0	0	0	0	0	0	0	0	1.842e-05	0	0	0	0	1.881e-05	3.483e-05	0	0.0394191	0.00716846	0	0	0.00098757	0.00511116	0	0	0	0	0	0	0	0	0
CASSGGLYEQYF	0.148206	15	0	5.81e-06	6.7e-06	8.17e-06	0.000257935	0.00014053	nacc8	0	0	0	0	1.904e-05	1.043e-05	0	0	0	0	0	0	0	0	0	0	0	0	0	0	0	0	0	0	0	0.0809129	0.0143369	0	0	0.00062846	0.0132248	1.476e-05	0	0	0	0	0	0	0	0
CAISAGLYEQYF	0.0799697	3	0	0	0	0	0	6.18332e-05	nacc8	0	0	0	0	0	0	0	0	0	0	0	0	0	0	0	0	0	0	0	0	0	0	0	0	0	0.0570539	0.00716846	0	0	0.0157473	0	0	0	0	0	0	0	0	0	0
CASSQWPGTSDGNEQFF	0.061543	4	0	0	0	0	0	0	nacc8	0	0	0	0	0	0	0	0	0	0	0	0	0	0	0	0	0	0	0	0	0	0	0	0	0	0.0497925	0.00358423	0	0	0	0.0079647	0	0	0	0	0	0	0	0	0
CATLQGVGTEAFF	0.0510226	4	0	0	0	0	0	0	nacc8	0	0	0	0	0	0	0	0	0	0	0	0	0	0	0	0	0	0	0	0	0	0	0	0	0	0.0425311	0.00358423	0	0	0	0.00483612	0	0	0	0	0	0	0	0	0
CASTPGLYEQYF	0.0405765	2	0	0	0	0	0	0	nacc8	0	0	0	0	0	0	0	0	0	0	0	0	0	0	0	0	0	0	0	0	0	0	0	0	0	0.0373444	0	0	0	0.00323206	0	0	0	0	0	0	0	0	0	0
CASSPGTGVLQPQHF	0.049954	9	0	0	2.009e-05	8.17e-06	0	0	nacc8	0	0	0	0	0	0	0	0	0	0	0	0	0	0	0	0	0	0	0	0	0	0	0	0	0	0.0342324	0.00358423	0	0	0.00184946	0.010016	1.476e-05	0	0	0	0	0	0	0	0
CASSSGLYEQYF	0.0419861	17	0	1.744e-05	1.339e-05	0	9.82608e-05	7.30756e-05	nacc8	0	0	0	0	0	0	0	0	0	0	0	0	0	0	0	0	0	1.842e-05	0	0	0	0	1.881e-05	0	0	0.0311203	0	0	6.266e-05	0.00583567	0.00331194	1.476e-05	0	0	0	0	0	0	1.096e-05	0
CASSQGLYEQYF	0.033499	11	1.022e-05	5.81e-06	6.7e-06	0	6.1413e-05	1.68636e-05	nacc8	0	0	0	0	0	0	0	0	0	0	0	0	0	0	0	0	0	0	0	0	0	0	1.881e-05	0	0	0.0217842	0.00716846	0	0	1.796e-05	0.00422874	1.476e-05	0	0	0	0	0	0	0	0
CASSLSVGGRNTEAFF	0.0184744	3	0	0	0	0	0	0	nacc8	0	0	0	0	0	0	0	0	0	0	0	0	0	0	0	0	0	0	0	0	0	0	0	0	0	0.0124481	0.00358423	0	0	0.002442	0	0	0	0	0	0	0	0	0	0
CASSQGVRPVGNEQFF	0.0120033	2	0	0	0	0	0	0	nacc8	0	0	0	0	0	0	0	0	0	0	0	0	0	0	0	0	0	0	0	0	0	0	0	0	0	0.0114108	0	0	0	0.00059254	0	0	0	0	0	0	0	0	0	0
CAASPGISEQYF	0.0166719	2	0	0	0	0	0	0	nacc8	0	0	0	0	0	0	0	0	0	0	0	0	0	0	0	0	0	0	0	0	0	0	0	0	0	0.0114108	0	0	0	0.00526108	0	0	0	0	0	0	0	0	0	0
CASSQGIGYEQYF	0.124448	4	0	0	0	0	0	5.6212e-06	nacc8 also clone	0	0	0	0	0	0	0	0	0	0	0	0	0	0	0	0	0	0	0	0	0	0	0	0	0	0.0207469	0	0	0	0	0.00135228	0	0	0	0	0	0	0	0	0
CASSLVGVAIEQFF	0.905405	3	0	0	6.7e-06	0	1.22826e-05	0	nacc8 clone only	0	0	0	0	0	0	0	0	0	0	0	0	0	0	0	0	0	0	0	0	0	0	0	0	0	0	0	0	0	0	0	0	0	0	0	0	0	0	0	0
CASSMGIGTEAFF	0.649137	4	0	5.81e-06	0	0	1.22826e-05	1.68636e-05	nacc8 clone only	0	0	0	0	0	0	0	0	0	0	0	0	0	0	0	0	0	0	0	0	0	0	0	0	0	0	0	0	0	0	0	0	0	0	0	0	0	0	0	0
CASSAGIGYGYTF	0.136368	2	0	0	0	0	0	0	nacc8 clone only	0	0	0	0	0	0	0	0	0	0	0	0	0	0	0	0	0	0	0	0	0	0	0	0	0	0	0	0	0	0	0	0	0	0	0	0	0	0	0	0
CASSAGTGVIQPQHF	0.320256	9	0	0	6.7e-06	0	0.000122826	3.93484e-05	nacc8 clone only	0	0	0	0	0	0	0	0	0	0	0	0	0	0	0	0	0	1.842e-05	0	0	0	0	0	0	0	0.00311203	0	0	0	0	0.0013752	0	0	0	0	0	0	0	0	0
CASSAPRRASGGFQETQYF	0.0701618	3	0	0	0	0	0	0	slc4	0	0	0	0	0	0	0	0	0	0	0	0	0	0	0	0	0	0	0	0	0	0	0	0	0	0	0	0	0	0	0	0	0	0	0	0	0	0	0	0.05
CASSNLRVSYEQYF	0.0702963	3	0	0	0	0	0	0	slc4	0	0	0	0	0	0	0	0	0	0	0	0	0	0	0	0	0	0	0	0	0	0	0	0	0	0	0	0	0	0	0	0	0	0	0	0	0	0	0	0.0434783
CASGAGFSEQFF	0.0737287	3	0	0	0	0	0	0	slc4	0	0	0	0	0	0	0	0	0	0	0	0	0	0	0	0	0	0	0	0	0	0	0	0	0	0	0	0	0	0	0	0	0	0	0	0	0	0	0	0.0434783
CASSIGGANTGELFF	0.0247564	6	0	5.81e-06	6.7e-06	0	0.000122826	0.000118045	slc4	0	0	0	0	0	0	0	0	0	0	0	0	0	0	0	0	0	0	0	0	0	0	0	0	0	0	0	0	0	0	0	0	0	0	0	0	0	0	0	0.023913
CASSLGDRDSPLHF	0.0174964	4	0	0	6.7e-06	0	0.000171956	2.8106e-05	slc4	0	0	0	0	0	0	0	0	0	0	0	0	0	0	0	0	0	0	0	0	0	0	0	0	0	0	0	0	0	0	0	0	0	0	0	0	0	0	0	0.0152174
CASSQGQGRYQETQYF	0.025935	3	0	0	0	0	0	0	slc4	0	0	0	0	0	0	0	0	0	0	0	0	0	0	0	0	0	0	0	0	0	0	0	0	0	0	0	0	0	0	0	0	0	0	0	0	0	0	0	0.0152174
CASSESADRGTEAFF	0.0122164	3	0	0	0	0	0.000135109	0.000118045	slc4	0	0	0	0	0	0	0	0	0	0	0	0	0	0	0	0	0	0	0	0	0	0	0	0	0	0	0	0	0	0	0	0	0	0	0	0	0	0	0	0.0108696
CASSQERGIQYF	0.344636	7	0	1.744e-05	0	0	7.36956e-05	0.000258575	slc4 also clone	0	0	0	0	0	0	0	0	0	0	0	0	0	0	0	0	0	0	0	0	0	0	0	0	0	0	0	0	0	0	0	0	0	0	0	0	0	0	0	0.0108696
CASSQEWGSNQPQHF	0.866801	5	0	5.81e-06	0	0	6.1413e-05	0.000101182	slc4 clone	0	0	0	0	0	0	0	0	0	0	0	0	0	0	0	0	0	0	0	0	0	0	0	0	0	0	0	0	0	0	0	0	0	0	0	0	0	0	0	0
CASSLGLARTGELFF	0.592296	6	0	1.744e-05	6.7e-06	0	4.91304e-05	3.93484e-05	slc4 clone	0	0	0	0	0	0	0	0	0	0	0	0	0	0	0	0	0	0	0	0	0	0	0	1.161e-05	0	0	0	0	0	0	0	0	0	0	0	0	0	0	0	0
CASSLLAGGIQETQYF	0.106386	1	0	0	0	0	0	0	slc4 clone	0	0	0	0	0	0	0	0	0	0	0	0	0	0	0	0	0	0	0	0	0	0	0	0	0	0	0	0	0	0	0	0	0	0	0	0	0	0	0	0
CSASRDGQRTQYF	0.461037	6	0	0	6.7e-06	0	0.000233369	7.86968e-05	slc4 clone	0	0	0	0	0	0	0	0	0	0	0	0	0	0	0	0	0	0	0	0	0	0	1.881e-05	0	0	0	0	0	0	0	0	0	0	0	0	0	0	0	0	0.00217391
CASSSTHAGEWETQYF	0.0390833	6	0	0	0	0	0	5.6212e-06	slc8	0	0	0	0	0	0	0	0	0	0	0	0	0	0	0	0	0	0	0	0	0	0	0	0	0	0	0	0	0	0	0	0	0	0	0	0	0	0	0	0.00217391
CSARDRDAEQFF	0.0626929	11	0	5.81e-06	0	0	7.36956e-05	0.000101182	slc8	0	0	0	0	0	0	0	0	0	0	0	0	0	0	0	0	0	0	0	0	0	0	0	0	0	0	0	0	0	0	0	0	0	0	0	0	0	0	0	0
CASSALQGEEQFF	0.0595106	12	0	1.163e-05	6.7e-06	0	0.000442174	0.00109051	slc8	0	0	0	0	5.712e-05	1.043e-05	0	0	0	0	0	0	0	0	0	0	0	0	0	0	0	0	0	0	0	0	0	0	0	0	0	0	0	0	0	0	0	0	0	0
CASSLVGTGLGELFF	0.103892	4	0	0	0	0	3.68478e-05	1.12424e-05	slc8	0	0	0	0	0	0	0	0	0	0	0	0	0	0	0	0	0	0	0	0	0	0	0	0	0	0	0	0	0	0	0	0	0	0	0	0	0	0	0	0
CASSLGLSGNQPQHF	0.0979038	3	0	0	0	0	0	0	slc8	0	0	0	0	0	0	0	0	0	0	0	0	0	0	0	0	0	0	0	0	0	0	0	0	0	0	0	0	0	0	0	0	0	0	0	0	0	0	0	0
CASSLGLALEQFF	0.0258344	2	0	0	0	0	1.22826e-05	0	slc8	0	0	0	0	0	0	0	0	0	0	0	0	0	0	0	0	0	0	0	0	0	0	0	0	0	0	0	0	0	0	0	0	0	0	0	0	0	0	0	0
CASSYGTGTEAFF	0.0389726	8	1.022e-05	2.326e-05	0	0	0.00101946	0.00123104	slc8	0	0	0	0	0	0	0	0	0	0	0	0	0	0	0	0	0	0	0	0	0	0	0	0	0	0	0	0	0	0	0	0	0	0	0	0	0	0	0	0
CASSVTSGIYEQYF	0.0247557	2	0	0	0	0	0	0	slc8	0	0	0	0	0	0	0	0	0	0	0	0	0	0	0	0	0	0	0	0	0	0	0	0	0	0	0	0	0	0	0	0	0	0	0	0	0	0	0	0
CASSLTEGNEQFF	0.0357753	9	0	2.326e-05	2.009e-05	0	0.000565	0.000168636	slc8	0	0	0	0	0	0	0	0	0	0	0	0	0	0	0	0	0	0	0	0	0	0	0	0	0	0	0	0	0	0	0	0	0	0	0	0	0	0	0	0
CASSSGTSAYNEQFF	0.0273839	4	0	0	0	0	0	5.6212e-06	slc8	0	0	0	0	0	0	0	0	0	0	0	2.171e-05	0	0	0	0	0	0	0	0	0	0	0	0	0	0	0	0	0	0	0	0	0	0	0	0	0	0	0	0
CASSPPSDSNQPQHF	0.0184676	2	0	0	0	0	0.000159674	0	slc8	0	0	0	0	0	0	0	0	0	0	0	0	0	0	0	0	0	0	0	0	0	0	0	0	0	0	0	0	0	0	0	0	0	0	0	0	0	0	0	0
CASSFGWGTEAFF	0.0376589	9	0	2.907e-05	2.009e-05	0	0.00135109	0.00379431	slc8	0	0	0	0	0	0	0	0	0	0	0	0	0	0	0	0	0	0	0	0	0	0	0	0	0	0	0	0	0	0	1.146e-05	0	0	0	0	0	0	0	0	0
CASSQVASETDTQYF	0.0152184	3	0	0	0	0	0	0	slc8	0	0	0	0	0	0	0	0	0	0	0	0	0	0	0	0	0	0	0	0	0	0	0	0	0	0	0	0	0	0	0	0	0	0	0	0	0	0	0	0
CSATPETGDSYEQYF	0.205309	9	0	1.163e-05	0	0	0.000307065	0.000146151	slc8 clone only	0	0	0	0	0	0	0	0	0	0	0	0	0	0	0	0	0	0	0	0	0	0	0	0	0	0	0	0	0	0	0	0	0	0	0	0	0	0	0	0
CASSQGLWGNEQFF	0.424801	11	0	1.744e-05	2.009e-05	0	6.1413e-05	6.18332e-05	slc8 clone only	0	0	0	0	0	0	0	0	0	0	0	0	0	0	0	0	0	0	0	0	0	0	0	0	0	0	0	0	0	0	0	0	0	0	0	0	0	0	0	0
CASSVLGQGAPNEQFF	0.688872	7	0	0	0	0	0	0	slc8 clone only	0	0	0	0	0	0	0	0	0	0	0	0	0	0	0	0	0	0	0	0	0	0	0	0	0	0	0	0	0	0	0	0	0	0	0	0	0	0	0	0
CASSLGAGVAQYF	0.184478	8	0	5.81e-06	0	0	0.000393043	0.000207984	slc8 clone only	0	0	0	0	0	0	0	0	0	0	0	0	0	0	0	0	0	0	0	0	0	0	0	0	0	0	0	0	0	0	0	0	0	0	0	0	0	0	0	0
CASSLLGDSGNTIYF	0.32235	3	0	0	0	0	2.45652e-05	2.8106e-05	slc8 clone only	0	0	0	0	0	0	0	0	0	0	0	0	0	0	0	0	0	0	0	0	0	0	0	0	0	0	0	0	0	0	0	0	0	0	0	0	0	0	0	0
CASSSTSGGAEVETQYF	0.120013	14	0	5.81e-06	6.7e-06	1.634e-05	0.000589565	0.000303545	slc8+ clone	0	0	0	0	0	0	0	0	0	0	0	0	0	0	0	0	0	0	0	0	0	0	0	1.161e-05	0	0	0	0	0	0	1.146e-05	0	0	0	0	0	0	1.585e-05	0	0
CASSFGVATPLHF	1.32072	19	0	1.163e-05	6.7e-06	0	3.68478e-05	6.18332e-05	slc8+clone	0	0	0	0	0	0	0	0	0	0	0	0	0	0	0	0	1.704e-05	0	0	0	0	0	0	0	0	0	0	0	0	0	0	0	1.988e-05	0	0	0	0	0	0	0
CASSDSSGSITDTQYF	0.918815	13	0	2.326e-05	1.339e-05	0	0.000110543	0.000309166	slc8+clone	0	0	0	0	0	0	0	0	0	0	0	0	0	0	0	0	0	0	0	0	0	0	0	0	0	0	0	0	0	0	0	0	0	0	0	0	0	0	0	0
CASSTTGTGGVVGDYGYTF	0.146198	5	0	0	6.7e-06	0	0	0	trp2 cd8	0	0	0	0	0	0	0	0	0	0	1.701e-05	0	0	0	0	0	0	0	0	0	0	0	0	0	0	0	0	0	0	0	0	0	0	0	0	0	0	0	0	0
CAISDPGTGASGELFF	0.0662578	10	0	0	0	2.452e-05	0	0	trp2 cd8	0	0	0	0	0	2.085e-05	0	0	0	0	0	0	0	0	0	0	1.704e-05	1.842e-05	0	0	0	0	1.881e-05	0	0	0	0	0	0	0	0	0	0	0	0	0	0	1.585e-05	0	0
CASSSGQGAGVETQYF	0.058813	3	0	5.81e-06	0	0	8.59782e-05	5.6212e-05		0	0	0	0	0	0	0	0	0	0	0	0	0	0	0	0	0	0	0	0	0	0	0	0	0	0	0	0	0	0	0	0	0	0	0	0	0	0	0	0
CASSLDGGRGDEQFF	0.00788368	4	0	5.81e-06	0	0	1.22826e-05	0.00014053		0	0	0	0	0	0	0	0	0	0	0	0	0	0	0	0	0	0	0	0	0	0	0	0	0	0	0	0	0	0	0	0	0	0	0	0	0	0	0	0
CASSPERGFGETQYF	0.0535313	22	0	0	0	0	0	0		0	0	0	0.00440529	0.00297024	0.00180389	0	0	0	0	0	0.00032565	0	0.00292398	0	0	0.00385205	0	0.00308642	0.00446429	0	0	0	0.00248482	0	0	0	0.00392157	0.00018797	0	0.00026358	0.000723	0	0	0	0	0	0.00299648	0.00092056	0
CASSLGETQYF	0.148888	38	0.00011243	0.00011629	0.00010046	0.00013075	0	3.37272e-05		0	0	0	0	7.616e-05	3.128e-05	0	0	0	0	3.401e-05	4.342e-05	0	0	0	0	5.113e-05	7.368e-05	0	0	0	0	7.523e-05	5.806e-05	0	0	0	0	0	0	5.73e-05	4.427e-05	3.976e-05	0	0	0	0	1.585e-05	3.288e-05	0
CSAPPLAGDETQYF	0.10426	12	1.022e-05	2.907e-05	5.358e-05	0	0	0		0	0	0	0	0	0	0	0	0	0	0	0	0	0	0	0	0	0	0	0	0	0	0	0	0	0	0	0	0	0	0	0	0	0	0	0	0	0	0	0
CASSPDVPYNSPLHF	0.0492294	14	0	0	0	0	0	0		0	0	0	0	0	0	0	0	0	0	0	0	0	0	0	0	0	0	0	0	0	0	0	0	0	0	0	0	0	0	0	0	0	0	0	0	0	0	0	0
CASSGPPLAGGVETQYF	0.0363842	14	0	0	0	0	0	0		0	0	0	0	0	0	0	0	0	0	0	0	0	0	0	0	0	0	0	0	0	0	0	0	0	0	0	0	0	0	0	0	0	0	0	0	0	0	0	0
CASSQDWRGGPQETQYF	0.0311147	14	0	0	0	0	0	0		0	0	0	0	0	0	0	0	0	0	0	0	0	0	0	0	0	0	0	0	0	0	0	0	0	0	0	0	0	0	0	0	0	0	0	0	0	0	0	0
CASSYSGEDTQYF	0.0312906	15	0	0	0	0	0	0		0	0	0	0	0	0	0	0	0	0	0	0	0	0	0	0	0	0	0	0	0	0	0	0	0	0	0	0	0	0	0	0	3.976e-05	0	0	0	0	0	0	0
CASSSAYYGYTF	0.0141433	14	0	0	0	0	0	0		0	0	0	0	0	0	0	0	0	0	0	0	0	0	0	0	0	0	0	0	0	0	0	0	0	0	0	0	0	0	0	0	0	0	0	0	0	0	0	0
CASSLAGDRNTEAFF	0.0134338	14	0	5.81e-06	0	0	0	0		0	0	0	0	0	0	0	0	0	0	0	0	0	0	0	0	0	0	0	0	0	0	0	0	0	0	0	0	0	0	0	0	0	0	0	0	0	0	0	0
CASSPSGGSEAFF	0.00040692	1	0	0	0	0	0	0		0	0	0	0	0	0	0	0	0	0	0	0	0	0	0	0	0	0	0	0	0	0	0	0	0	0	0	0	0	0	0	0	0	0	0	0	0	0	0	0
CASSQEWRGYNEQFF	0.0224863	14	0	0	0	0	0	0		0	0	0	0	0	0	0	0	0	0	0	0	0	0	0	0	0	0	0	0	0	0	0	0	0	0	0	0	0	0	0	0	0	0	0	0	0	0	0	0
CASSVMTGWFTEAFF	0.00880043	10	0	0	0	0	0	0		0	0	0	0	0	0	0	0	0	0	0	0	0	0	0	0	0	0	0	0	0	0	0	0	0	0	0	0	0	0	0	0	0	0	0	0	0	0	0	0
CASSVTSGAYNEQFF	0.00212288	5	0	0	0	0	0	0		0	0	0	0	0	0	0	0	0	0	0	0	0	0	0	0	0	0	0	0	0	0	0	0	0	0	0	0	0	0	0	0	0	0	0	0	0	0	0	0
CSVGRLNTEAFF	0.00032099	2	0	0	0	0	0	0		0	0	0	0	0	0	0	0	0	0	0	0	0	0	0	0	0	0	0	0	0	0	0	0	0	0	0	0	0	0	0	0	0	0	0	0	0	0	0	0
CSARVTGAEAFF	0.00030519	1	0	0	0	0	0	0		0	0	0	0	0	0	0	0	0	0	0	0	0	0	0	0	0	0	0	0	0	0	0	0	0	0	0	0	0	0	0	0	0	0	0	0	0	0	0	0
CSARGDSEAFF	0.00030519	1	0	0	0	0	0	0		0	0	0	0	0	0	0	0	0	0	0	0	0	0	0	0	0	0	0	0	0	0	0	0	0	0	0	0	0	0	0	0	0	0	0	0	0	0	0	0
CASSLQRHTEAFF	0.00030519	1	0	0	0	0	0	0		0	0	0	0	0	0	0	0	0	0	0	0	0	0	0	0	0	0	0	0	0	0	0	0	0	0	0	0	0	0	0	0	0	0	0	0	0	0	0	0
CASSLEWVSTGELFF	0.00030519	1	0	0	0	0	0	0		0	0	0	0	0	0	0	0	0	0	0	0	0	0	0	0	0	0	0	0	0	0	0	0	0	0	0	0	0	0	0	0	0	0	0	0	0	0	0	0
CASSEGPQNRAFF	0.00030519	1	0	0	0	0	0	0		0	0	0	0	0	0	0	0	0	0	0	0	0	0	0	0	0	0	0	0	0	0	0	0	0	0	0	0	0	0	0	0	0	0	0	0	0	0	0	0
CASSARTSGGRETQYF	0.00030519	1	0	0	0	0	0	0		0	0	0	0	0	0	0	0	0	0	0	0	0	0	0	0	0	0	0	0	0	0	0	0	0	0	0	0	0	0	0	0	0	0	0	0	0	0	0	0
CASSYVPNYGYTF	0.0327633	9	8.177e-05	6.978e-05	8.037e-05	0	0	0		0	0	0	0	0	0	0	0	0	0	0	0	0	0	0	0	0	0	0	0	0	0	0	0	0	0	0	0	0	0	0	0	0	0	0	0	0	0	0	0
CAWTANTEAFF	0.0238402	12	0	0	0	0	0	0		0	0	0	0	0	0	0	0	0	0	0	0	0	0	0	0	0	0	0	0	0	0	0	0	0	0	0	0	0	0	0	0	0	0	0	0	0	0	0	0
CASSPDRDPRNTIYF	0.0210319	14	0	0	0	0	0	0		0	0	0	0	0	0	0	0	0	0	0	0	0	0	0	0	0	0	0	0	0	0	0	0	0	0	0	0	0	0	0	0	0	0	0	0	0	0	0	0
CASSYSGSDEQFF	0.0162464	14	0	0	0	0	0	0		0	0	0	0	0	0	0	0	0	0	0	0	0	0	0	0	0	0	0	0	0	0	0	0	0	0	0	0	0	0	0	0	0	0	0	0	0	0	0	0
CASTRFASGYNEQFF	0.00345814	10	0	0	0	0	0	0		0	0	0	0	0	0	0	0	0	0	0	0	0	0	0	0	0	0	0	0	0	0	0	0	0	0	0	0	0	0	0	0	0	0	0	0	0	0	0	0
CASSLTGNEQYF	0.00166393	8	0	5.81e-06	6.7e-06	0	0	0		0	0	0	0	0	0	0	0	0	0	0	0	0	0	0	0	0	0	0	0	0	0	1.881e-05	0	0	0	0	0	0	0	0	1.476e-05	0	0	0	0	0	0	0	0
CAWSPSGVTDTQYF	0.00538495	12	0	0	0	0	0	0		0	0	0	0	0	0	0	0	0	0	0	0	0	0	0	0	0	0	0	0	0	0	0	0	0	0	0	0	0	0	0	0	0	0	0	0	0	0	0	0
CASSPEWDPVRGTQYF	0.00260015	10	0	0	0	0	0	0		0	0	0	0	0	0	0	0	0	0	0	0	0	0	0	0	0	0	0	0	0	0	0	0	0	0	0	0	0	0	0	0	0	0	0	0	0	0	0	0
CASSSANYGYTF	0.00449921	12	0	0	6.7e-06	0	0	0		0	0	0	0	0	0	0	0	0	0	0	0	0	0	0	0	0	0	0	0	0	0	0	0	0	0	0	0	0	0	0	0	0	0	0	0	0	0	0	0
CATSLSETKATYEQYF	0.00634094	14	0	0	0	0	0	0		0	0	0	0	0	0	0	0	0	0	0	0	0	0	0	0	0	0	0	0	0	0	0	0	0	0	0	0	0	0	0	0	0	0	0	0	0	0	0	0
CASSKREVDTGELFF	0.00626454	12	0	0	0	0	0	0		0	0	0	0	0	0	0	0	0	0	0	0	0	0	0	0	0	0	0	0	0	0	0	0	0	0	0	0	0	0	0	0	0	0	0	0	0	0	0	0
CASSSTGGGATQYF	0.0005002	3	0	0	0	0	0	0		0	0	0	0	0	0	0	0	0	0	0	0	0	0	0	0	0	0	0	0	0	0	0	0	0	0	0	0	0	0	0	0	0	0	0	0	0	0	0	0
CASSESQPQHF	0.00038365	3	0	0	0	0	0	0		0	0	0	0	0	0	0	0	0	0	0	0	0	0	0	0	0	0	0	0	0	0	0	0	0	0	0	0	0	0	0	0	0	0	0	0	0	3.171e-05	0	0
CASSPRGRQGDEQFF	0.00036532	2	0	0	0	0	0	0		0	0	0	0	0	0	0	0	0	0	0	0	0	0	0	0	0	0	0	0	0	0	0	0	0	0	0	0	0	0	0	0	0	0	0	0	0	0	0	0
CASSGGTSGSLREQYF	0.00042588	2	0	0	0	0	0	0		0	0	0	0	0	0	0	0	0	0	0	0	0	0	0	0	0	0	0	0	0	0	0	0	0	0	0	0	0	0	0	0	0	0	0	0	0	0	0	0
CASSLWTSGFYNEQFF	0.00172669	2	0	0	0	0	0	0		0	0	0	0	0	0	0	0	0	0	0	0	0	0	0	0	0	0	0	0	0	0	0	0	0	0	0	0	0	0	0	0	0	0	0	0	0	0	0	0
CASSAGDRVTEAFF	0.00096507	2	0	0	0	0	0	0		0	0	0	0	0	0	0	0	0	0	0	0	0	0	0	0	0	0	0	0	0	0	0	0	0	0	0	0	0	0	0	0	0	0	0	0	0	0	0	0
CASSLGQSNQPQHF	0.00037143	10	2.044e-05	5.81e-06	1.339e-05	0	0	5.6212e-06		0	0	0	0	1.904e-05	1.043e-05	0	0	0	0	0	0	0	0	0	0	0	0	0	0	0	0	0	0	0	0	0	0	2.089e-05	0	0	0	0	0	0	0	0	1.585e-05	0	0
CASSYSGGGTEAFF	0.00024318	5	0	5.81e-06	6.7e-06	8.17e-06	0	0		0	0	0	0	1.904e-05	0	0	0	0	0	0	0	0	0	0	0	0	0	0	0	0	0	0	0	0	0	0	0	0	0	0	0	0	0	0	0	0	0	0	0
CASSLGDGSYEQYF	0.00025281	4	0	5.81e-06	6.7e-06	0	0	0		0	0	0	0	0	0	0	0	0	0	0	0	0	0	0	0	0	3.684e-05	0	0	0	0	0	0	0	0	0	0	0	0	0	0	0	0	0	0	0	0	0	0
CASSQAGGGTEAFF	0.00021389	2	0	0	0	0	1.22826e-05	2.24848e-05		0	0	0	0	0	1.043e-05	0	0	0	0	0	0	0	0	0	0	0	0	0	0	0	0	0	0	0	0	0	0	0	0	0	0	0	0	0	0	0	0	0	0
CASSLGLRGQPQHF	0.00022047	2	0	0	0	0	0	0		0	0	0	0	0	0	0	0	0	0	1.701e-05	0	0	0	0	0	0	0	0	0	0	0	0	0	0	0	0	0	0	0	0	0	0	0	0	0	0	0	0	0
CASSGQGKTEAFF	0.00022188	2	0	0	0	0	0	0		0	0	0	0	0	0	0	0	0	0	0	0	0	0	0	0	0	1.842e-05	0	0	0	0	0	0	0	0	0	0	0	0	0	0	0	0	0	0	0	0	0	0
CASRKLAGGTDTQYF	0.00022188	2	0	0	0	0	0	0		0	0	0	0	0	0	0	0	0	0	0	0	0	0	0	0	0	1.842e-05	0	0	0	0	0	0	0	0	0	0	0	0	0	0	0	0	0	0	0	0	0	0
CSVEWQSEAFF	0.00020346	1	0	0	0	0	0	0		0	0	0	0	0	0	0	0	0	0	0	0	0	0	0	0	0	0	0	0	0	0	0	0	0	0	0	0	0	0	0	0	0	0	0	0	0	0	0	0
CSASILAGYQETQYF	0.00020346	1	0	0	0	0	0	0		0	0	0	0	0	0	0	0	0	0	0	0	0	0	0	0	0	0	0	0	0	0	0	0	0	0	0	0	0	0	0	0	0	0	0	0	0	0	0	0
CSARPGQGDYGYTF	0.00020346	1	0	0	0	0	0	0		0	0	0	0	0	0	0	0	0	0	0	0	0	0	0	0	0	0	0	0	0	0	0	0	0	0	0	0	0	0	0	0	0	0	0	0	0	0	0	0
CSANPGRGDTEAFF	0.00020346	1	0	0	0	0	0	0		0	0	0	0	0	0	0	0	0	0	0	0	0	0	0	0	0	0	0	0	0	0	0	0	0	0	0	0	0	0	0	0	0	0	0	0	0	0	0	0
CATSDQGVAFF	0.00020346	1	0	0	0	0	0	0		0	0	0	0	0	0	0	0	0	0	0	0	0	0	0	0	0	0	0	0	0	0	0	0	0	0	0	0	0	0	0	0	0	0	0	0	0	0	0	0
CASSYSGTGGTFF	0.00020346	1	0	0	0	0	0	0		0	0	0	0	0	0	0	0	0	0	0	0	0	0	0	0	0	0	0	0	0	0	0	0	0	0	0	0	0	0	0	0	0	0	0	0	0	0	0	0
CASSVGAGGGYTF	0.00020346	1	0	0	0	0	0	0		0	0	0	0	0	0	0	0	0	0	0	0	0	0	0	0	0	0	0	0	0	0	0	0	0	0	0	0	0	0	0	0	0	0	0	0	0	0	0	0
CASSTGGLVGGELFF	0.00020346	1	0	0	0	0	0	0		0	0	0	0	0	0	0	0	0	0	0	0	0	0	0	0	0	0	0	0	0	0	0	0	0	0	0	0	0	0	0	0	0	0	0	0	0	0	0	0
CASSSRPWQGNRETQYF	0.00020346	1	0	0	0	0	0	0		0	0	0	0	0	0	0	0	0	0	0	0	0	0	0	0	0	0	0	0	0	0	0	0	0	0	0	0	0	0	0	0	0	0	0	0	0	0	0	0
CASSRQGRYTEAFF	0.00020346	1	0	0	0	0	0	0		0	0	0	0	0	0	0	0	0	0	0	0	0	0	0	0	0	0	0	0	0	0	0	0	0	0	0	0	0	0	0	0	0	0	0	0	0	0	0	0
CASSRGGQGQGYTF	0.00020346	1	0	0	0	0	0	0		0	0	0	0	0	0	0	0	0	0	0	0	0	0	0	0	0	0	0	0	0	0	0	0	0	0	0	0	0	0	0	0	0	0	0	0	0	0	0	0
CASSRDPSSGNTIYF	0.00020346	1	0	0	0	0	0	0		0	0	0	0	0	0	0	0	0	0	0	0	0	0	0	0	0	0	0	0	0	0	0	0	0	0	0	0	0	0	0	0	0	0	0	0	0	0	0	0
CASSQTPEGSSYGYTF	0.00020346	1	0	0	0	0	0	0		0	0	0	0	0	0	0	0	0	0	0	0	0	0	0	0	0	0	0	0	0	0	0	0	0	0	0	0	0	0	0	0	0	0	0	0	0	0	0	0
CASSQQTDMNTEAFF	0.00020346	1	0	0	0	0	0	0		0	0	0	0	0	0	0	0	0	0	0	0	0	0	0	0	0	0	0	0	0	0	0	0	0	0	0	0	0	0	0	0	0	0	0	0	0	0	0	0
CASSQESVYTGELFF	0.00020346	1	0	0	0	0	0	0		0	0	0	0	0	0	0	0	0	0	0	0	0	0	0	0	0	0	0	0	0	0	0	0	0	0	0	0	0	0	0	0	0	0	0	0	0	0	0	0
CASSQENRGMKYGYTF	0.00020346	1	0	0	0	0	0	0		0	0	0	0	0	0	0	0	0	0	0	0	0	0	0	0	0	0	0	0	0	0	0	0	0	0	0	0	0	0	0	0	0	0	0	0	0	0	0	0
CASSPTSPRETQYF	0.00020346	1	0	0	0	0	0	0		0	0	0	0	0	0	0	0	0	0	0	0	0	0	0	0	0	0	0	0	0	0	0	0	0	0	0	0	0	0	0	0	0	0	0	0	0	0	0	0
CASSPPPSGRGTGELFF	0.00020346	1	0	0	0	0	0	0		0	0	0	0	0	0	0	0	0	0	0	0	0	0	0	0	0	0	0	0	0	0	0	0	0	0	0	0	0	0	0	0	0	0	0	0	0	0	0	0
CASSPKGAPDTQYF	0.00020346	1	0	0	0	0	0	0		0	0	0	0	0	0	0	0	0	0	0	0	0	0	0	0	0	0	0	0	0	0	0	0	0	0	0	0	0	0	0	0	0	0	0	0	0	0	0	0
CASSPIGQGDYGYTF	0.00020346	1	0	0	0	0	0	0		0	0	0	0	0	0	0	0	0	0	0	0	0	0	0	0	0	0	0	0	0	0	0	0	0	0	0	0	0	0	0	0	0	0	0	0	0	0	0	0
CASSPGLAGGGNTQYF	0.00020346	1	0	0	0	0	0	0		0	0	0	0	0	0	0	0	0	0	0	0	0	0	0	0	0	0	0	0	0	0	0	0	0	0	0	0	0	0	0	0	0	0	0	0	0	0	0	0
CASSPDTAGYTF	0.00020346	1	0	0	0	0	0	0		0	0	0	0	0	0	0	0	0	0	0	0	0	0	0	0	0	0	0	0	0	0	0	0	0	0	0	0	0	0	0	0	0	0	0	0	0	0	0	0
CASSNGGQMNTEAFF	0.00020346	1	0	0	0	0	0	0		0	0	0	0	0	0	0	0	0	0	0	0	0	0	0	0	0	0	0	0	0	0	0	0	0	0	0	0	0	0	0	0	0	0	0	0	0	0	0	0
CASSLRTNQEVQFF	0.00020346	1	0	0	0	0	0	0		0	0	0	0	0	0	0	0	0	0	0	0	0	0	0	0	0	0	0	0	0	0	0	0	0	0	0	0	0	0	0	0	0	0	0	0	0	0	0	0
CASSLRRTDTEAFF	0.00020346	1	0	0	0	0	0	0		0	0	0	0	0	0	0	0	0	0	0	0	0	0	0	0	0	0	0	0	0	0	0	0	0	0	0	0	0	0	0	0	0	0	0	0	0	0	0	0
CASSLGQGASTEAFF	0.00020346	1	0	0	0	0	0	0		0	0	0	0	0	0	0	0	0	0	0	0	0	0	0	0	0	0	0	0	0	0	0	0	0	0	0	0	0	0	0	0	0	0	0	0	0	0	0	0
CASSHDRAPQETQYF	0.00020346	1	0	0	0	0	0	0		0	0	0	0	0	0	0	0	0	0	0	0	0	0	0	0	0	0	0	0	0	0	0	0	0	0	0	0	0	0	0	0	0	0	0	0	0	0	0	0
CASSGAGGTQETQYF	0.00020346	1	0	0	0	0	0	0		0	0	0	0	0	0	0	0	0	0	0	0	0	0	0	0	0	0	0	0	0	0	0	0	0	0	0	0	0	0	0	0	0	0	0	0	0	0	0	0
CASSFYETQYF	0.00020346	1	0	0	0	0	0	0		0	0	0	0	0	0	0	0	0	0	0	0	0	0	0	0	0	0	0	0	0	0	0	0	0	0	0	0	0	0	0	0	0	0	0	0	0	0	0	0
CASSFSQGQLNEQFF	0.00020346	1	0	0	0	0	0	0		0	0	0	0	0	0	0	0	0	0	0	0	0	0	0	0	0	0	0	0	0	0	0	0	0	0	0	0	0	0	0	0	0	0	0	0	0	0	0	0
CASSFLSGTGGPTSYGYTF	0.00020346	1	0	0	0	0	0	0		0	0	0	0	0	0	0	0	0	0	0	0	0	0	0	0	0	0	0	0	0	0	0	0	0	0	0	0	0	0	0	0	0	0	0	0	0	0	0	0
CASSELGPAYEQYF	0.00020346	1	0	0	0	0	0	0		0	0	0	0	0	0	0	0	0	0	0	0	0	0	0	0	0	0	0	0	0	0	0	0	0	0	0	0	0	0	0	0	0	0	0	0	0	0	0	0
CASSEGGTGVWSNQPQHF	0.00020346	1	0	0	0	0	0	0		0	0	0	0	0	0	0	0	0	0	0	0	0	0	0	0	0	0	0	0	0	0	0	0	0	0	0	0	0	0	0	0	0	0	0	0	0	0	0	0
CASSEALRGAGGYEQYF	0.00020346	1	0	0	0	0	0	0		0	0	0	0	0	0	0	0	0	0	0	0	0	0	0	0	0	0	0	0	0	0	0	0	0	0	0	0	0	0	0	0	0	0	0	0	0	0	0	0
CASRSLGLTGNQPQHF	0.00020346	1	0	0	0	0	0	0		0	0	0	0	0	0	0	0	0	0	0	0	0	0	0	0	0	0	0	0	0	0	0	0	0	0	0	0	0	0	0	0	0	0	0	0	0	0	0	0
CASRRGLNSPLHF	0.00020346	1	0	0	0	0	0	0		0	0	0	0	0	0	0	0	0	0	0	0	0	0	0	0	0	0	0	0	0	0	0	0	0	0	0	0	0	0	0	0	0	0	0	0	0	0	0	0
CASRQGSGDEKLFF	0.00020346	1	0	0	0	0	0	0		0	0	0	0	0	0	0	0	0	0	0	0	0	0	0	0	0	0	0	0	0	0	0	0	0	0	0	0	0	0	0	0	0	0	0	0	0	0	0	0
CASRPAEAGGGTGELFF	0.00020346	1	0	0	0	0	0	0		0	0	0	0	0	0	0	0	0	0	0	0	0	0	0	0	0	0	0	0	0	0	0	0	0	0	0	0	0	0	0	0	0	0	0	0	0	0	0	0
CASRIDRGTTEAFF	0.00020346	1	0	0	0	0	0	0		0	0	0	0	0	0	0	0	0	0	0	0	0	0	0	0	0	0	0	0	0	0	0	0	0	0	0	0	0	0	0	0	0	0	0	0	0	0	0	0
CASRGRDFPRGTGELFF	0.00020346	1	0	0	0	0	0	0		0	0	0	0	0	0	0	0	0	0	0	0	0	0	0	0	0	0	0	0	0	0	0	0	0	0	0	0	0	0	0	0	0	0	0	0	0	0	0	0
CASPGATKERTEAFF	0.00020346	1	0	0	0	0	0	0		0	0	0	0	0	0	0	0	0	0	0	0	0	0	0	0	0	0	0	0	0	0	0	0	0	0	0	0	0	0	0	0	0	0	0	0	0	0	0	0
CASNSTGRNNQPQHF	0.00020346	1	0	0	0	0	0	0		0	0	0	0	0	0	0	0	0	0	0	0	0	0	0	0	0	0	0	0	0	0	0	0	0	0	0	0	0	0	0	0	0	0	0	0	0	0	0	0
CASGSHWGTGELFF	0.00020346	1	0	0	0	0	0	0		0	0	0	0	0	0	0	0	0	0	0	0	0	0	0	0	0	0	0	0	0	0	0	0	0	0	0	0	0	0	0	0	0	0	0	0	0	0	0	0
CASGRQGPDTQYF	0.00020346	1	0	0	0	0	0	0		0	0	0	0	0	0	0	0	0	0	0	0	0	0	0	0	0	0	0	0	0	0	0	0	0	0	0	0	0	0	0	0	0	0	0	0	0	0	0	0
CASGRELFF	0.00020346	1	0	0	0	0	0	0		0	0	0	0	0	0	0	0	0	0	0	0	0	0	0	0	0	0	0	0	0	0	0	0	0	0	0	0	0	0	0	0	0	0	0	0	0	0	0	0
CASGDGSYNEQFF	0.00020346	1	0	0	0	0	0	0		0	0	0	0	0	0	0	0	0	0	0	0	0	0	0	0	0	0	0	0	0	0	0	0	0	0	0	0	0	0	0	0	0	0	0	0	0	0	0	0
CASGTEAFF	0.0241678	5	1.022e-05	0	0	0	0	0		0	0	0	0	0	0	0	0	0	0	0	0	0	0	0	0	0	0	0	0	0	0	0	0	0	0	0	0	0	3.591e-05	0	0	0	0	0	0	0	0	0	0
CASRLDTNYGYTF	0.0115178	4	0	0	0	0	0	0		0	0	0	0	0	0	0	0	0	0	0	0	0	0	0	0	0	0	0	0	0	0	0	0	0	0	0	0	0	0	0	0	0	0	0	0	0	0	0	0
CASLLAGGPGQFF	0.00898154	5	0	0	0	0	0	0		0	0	0	0	0	0	0	0	0	0	0	0	0	0	0	0	0	0	0	0	0	0	0	0	0	0	0	0	0	0	0	0	0	0	0	0	0	0	0	0
CASSLEAVNTEAFF	0.00253628	6	0	0	0	0	0	0		0	0	0	0	0	0	0	0	0	0	0	0	0	0	0	0	0	0	0	0	0	0	0	1.161e-05	0	0	0	0	0	0	0	0	0	0	0	0	0	0	0	0
CASSQETVGTMNTEAFF	0.0053512	10	0	0	0	0	0	0		0	0	0	0	0	0	0	0	0	0	0	0	0	0	0	0	0	0	0	0	0	0	0	0	0	0	0	0	0	0	0	0	0	0	0	0	0	0	0	0
CASSLDLGGTDTQYF	0.00264539	10	1.022e-05	0	0	0	0	0		0	0	0	0	0	0	0	0	0	0	0	0	0	0	0	0	0	0	0	0	0	0	0	0	0	0	0	0	0	0	0	0	0	0	0	0	0	0	0	0
CASSHFEGDTDTQYF	0.00180688	3	0	0	0	0	0	0		0	0	0	0	0	0	0	0	0	0	0	0	0	0	0	0	0	0	0	0	0	0	0	0	0	0	0	0	0	0	0	0	0	0	0	0	0	0	0	0
CASSWGWGSNQPQHF	0.00916594	13	0	0	0	0	0	0		0	0	0	0	0	0	0	0	0	0	0	0	0	0	0	0	0	0	0	0	0	0	0	0	0	0	0	0	0	0	0	0	0	0	0	0	0	0	0	0
CASSLVRGGEVQETQYF	0.00477172	13	0	0	0	0	0	0		0	0	0	0	0	0	0	0	0	0	0	0	0	0	0	0	0	0	0	0	0	0	0	0	0	0	0	0	0	0	0	0	0	0	0	0	0	0	0	0
CSARDPPKVGQFF	0.00422899	9	0	0	0	0	0	0		0	0	0	0	0	0	0	0	0	0	0	0	0	0	0	0	0	0	0	0	0	0	0	0	0	0	0	0	0	0	0	0	0	0	0	0	0	0	0	0
CSAEGGGAGEKLFF	0.00150827	3	0	0	0	0	0	0		0	0	0	0	0	0	0	0	0	0	0	0	0	0	0	0	0	0	0	0	0	0	0	0	0	0	0	0	0	0	0	0	0	0	0	0	0	0	0	0
CSARVAGVYNEQFF	0.00067557	4	0	0	0	0	0	0		0	0	0	0	0	0	0	0	0	0	0	0	0	0	0	0	0	0	0	0	0	0	0	0	0	0	0	0	0	0	0	0	0	0	0	0	0	0	1.096e-05	0
CASSLSSGGLSYEQYF	0.00037521	2	0	0	0	0	0	0		0	0	0	0	0	0	0	0	0	0	0	0	0	0	0	0	0	0	0	0	0	0	0	0	0	0	0	0	0	0	0	0	0	0	0	0	0	0	0	0
CASSHHSGGSYNEQFF	0.00396151	11	0	0	0	0	0	0		0	0	0	0	0	0	0	0	0	0	0	0	0	0	0	0	0	0	0	0	0	0	0	0	0	0	0	0	0	0	0	0	0	0	0	0	0	0	0	0
CASSLKVTEETQYF	0.00215871	8	0	0	0	0	0	0		0	0	0	0	0	0	0	0	0	0	0	0	0	0	0	0	0	0	0	0	0	0	0	0	0	0	0	0	0	0	0	0	0	0	0	0	0	0	0	0
CASSPWTGLLGETQYF	0.00267948	9	0	0	0	0	0	0		0	0	0	0	0	0	0	0	0	0	0	0	0	0	0	0	0	0	0	0	0	0	0	0	0	0	0	0	0	0	0	0	0	0	0	0	0	0	0	0
CASSSAGALAKNIQYF	0.00069519	4	0	0	0	0	0	0		0	0	0	0	0	0	0	0	0	0	0	0	0	0	0	0	0	0	0	0	0	0	0	0	0	0	0	0	0	0	0	0	0	0	0	0	0	0	0	0
CASSYRVNTEAFF	0.0015167	12	1.022e-05	5.81e-06	0	1.634e-05	0	0		0	0	0	0	0	0	0	0	0	0	0	0	0	0	0	0	0	1.842e-05	0	0	0	0	1.881e-05	0	0	0	0	0	0	0	1.146e-05	0	0	0	0	0	0	0	0	0
CASSPEGQPRETQYF	0.00226438	9	0	0	0	0	0	0		0	0	0	0	0	0	0	0	0	0	0	0	0	0	0	0	0	0	0	0	0	0	0	0	0	0	0	0	0	0	0	0	0	0	0	0	0	0	0	0
CSARSVGVKQETQYF	0.00939657	12	0	0	0	0	0	0		0	0	0	0	0	0	0	0	0	0	0	0	0	0	0	0	0	0	0	0	0	0	0	0	0	0	0	0	0	0	0	0	0	0	0	0	0	0	0	0
CASSLGVLGTEAFF	0.00074403	4	0	0	0	0	0	0		0	0	0	0	0	0	0	0	0	0	0	0	0	0	0	0	0	0	0	0	0	0	0	0	0	0	0	0	0	0	0	0	0	0	0	0	0	0	0	0
CASSPFGFRGDSDYGYTF	0.00043747	2	0	0	0	0	0	0		0	0	0	0	0	0	0	0	0	0	0	0	0	0	0	0	0	0	0	0	0	0	0	0	0	0	0	0	0	0	0	0	0	0	0	0	0	0	0	0
CASSPSSYEQYF	0.00209824	23	2.044e-05	2.326e-05	2.009e-05	1.634e-05	2.45652e-05	5.6212e-05		0	0	0	0	0	4.171e-05	0	0	0	0	1.701e-05	0	0	0	0	0	3.409e-05	3.684e-05	0	0	0	0	3.762e-05	2.322e-05	0	0	0	0	0	1.796e-05	2.292e-05	2.951e-05	1.988e-05	0	0	0	0	0	3.288e-05	0
CASSPDTNEQFF	0.00155187	9	0	5.81e-06	0	8.17e-06	0	0		0	0	0	0	0	0	0	0	0	0	0	0	0	0	0	0	0	0	0	0	0	0	0	0	0	0	0	0	0	0	0	0	0	0	0	0	0	0	0	0
CSDGQVNTGELFF	0.00122964	5	0	0	0	0	0	0		0	0	0	0	0	0	0	0	0	0	0	0	0	0	0	0	0	0	0	0	0	0	0	0	0	0	0	0	0	0	0	0	0	0	0	0	0	0	0	0
CASSSLRVAYLSEQYF	0.0002696	2	0	0	0	0	0	0		0	0	0	0	0	0	0	0	0	0	0	0	0	0	0	0	0	0	0	0	0	0	0	0	0	0	0	0	0	0	0	0	0	0	0	0	0	0	0	0
CASSLVVYGKAFNSPLHF	0.0002696	2	0	0	0	0	0	0		0	0	0	0	0	0	0	0	0	0	0	0	0	0	0	0	0	0	0	0	0	0	0	0	0	0	0	0	0	0	0	0	0	0	0	0	0	0	0	0
CASSPEDSSRETQYF	0.00202091	6	0	0	0	0	0	0		0	0	0	0	0	0	0	0	0	0	0	0	0	0	0	0	0	0	0	0	0	0	0	0	0	0	0	0	0	0	0	0	0	0	0	0	0	0	0	0
CSARGLAGEYNEQFF	0.00083594	2	0	0	0	0	0	0		0	0	0	0	0	0	0	0	0	0	0	0	0	0	0	0	0	0	0	0	0	0	0	0	0	0	0	0	0	0	0	0	0	0	0	0	0	0	0	0
CSARGDLLTDTQYF	0.00083594	2	0	0	0	0	0	0		0	0	0	0	0	0	0	0	0	0	0	0	0	0	0	0	0	0	0	0	0	0	0	0	0	0	0	0	0	0	0	0	0	0	0	0	0	0	0	0
CASSLGASGSSDEQFF	0.00083594	2	0	0	0	0	0	0		0	0	0	0	0	0	0	0	0	0	0	0	0	0	0	0	0	0	0	0	0	0	0	0	0	0	0	0	0	0	0	0	0	0	0	0	0	0	0	0
CASSFAAGVTRAKNIQYF	0.00241859	7	0	0	0	0	0	0		0	0	0	0	0	0	0	0	0	0	0	0	0	0	0	0	0	0	0	0	0	0	0	0	0	0	0	0	0	0	0	0	0	0	0	0	0	0	0	0
CASRAPSTDTQYF	0.00160723	6	0	0	0	0	0	0		0	0	0	0	0	0	0	0	0	0	0	0	0	0	0	0	0	0	0	0	0	0	0	0	0	0	0	0	0	0	0	0	0	0	0	0	0	0	0	0
CASSLRFWGSSASYNEQFF	0.00095085	5	0	0	0	0	0	0		0	0	0	0	0	0	0	0	0	0	0	0	0	0	0	0	0	0	0	0	0	0	0	0	0	0	0	0	0	0	0	0	0	0	0	0	0	0	0	0
CASRPHRAPQETQYF	0.00068375	4	0	0	0	0	0	0		0	0	0	0	0	0	0	0	0	0	0	0	0	0	0	0	0	0	0	0	0	0	0	0	0	0	0	0	0	0	0	0	0	0	0	0	0	0	0	0
CSAPAIHSSYNEQFF	0.00041207	3	0	0	0	0	0	0		0	0	0	0	0	0	0	0	0	0	0	0	0	0	0	0	0	0	0	0	0	0	0	0	0	0	0	0	0	0	0	0	0	0	0	0	0	0	0	0
CASSLIRVSPYNEQFF	0.0005173	3	0	0	0	0	0	0		0	0	0	0	0	0	0	0	0	0	0	0	0	0	0	0	0	0	0	0	0	0	0	0	0	0	0	0	0	0	0	0	0	0	0	0	0	0	0	0
CASSITSGSYNEQFF	0.0005173	3	0	0	0	0	0	0		0	0	0	0	0	0	0	0	0	0	0	0	0	0	0	0	0	0	0	0	0	0	0	0	0	0	0	0	0	0	0	0	0	0	0	0	0	0	0	0
CASNRGGETQYF	0.00068524	3	0	5.81e-06	0	0	0	0		0	0	0	0	0	0	0	0	0	0	0	0	0	0	0	0	0	0	0	0	0	0	0	0	0	0	0	0	0	0	0	0	0	0	0	0	0	0	0	0
CASSLTSGSYNEQFF	0.00125794	17	1.022e-05	1.163e-05	6.7e-06	1.634e-05	0	5.6212e-06		0	0	0	0	0	2.085e-05	0	0	0	0	1.701e-05	0	0	0	0	0	0	0	0	0	0	0	1.881e-05	0	0	0	0	0	0	1.796e-05	0	1.476e-05	0	0	0	0	0	0	2.192e-05	0
CASSISGRGETQYF	0.00149966	4	0	0	0	0	0	0		0	0	0	0	0	0	0	0	0	0	0	0	0	0	0	0	0	0	0	0	0	0	0	0	0	0	0	0	0	0	0	0	0	0	0	0	0	0	0	0
CSVGTGGTNEKLFF	0.00137461	4	0	0	0	0	0	0		0	0	0	0	0	0	0	0	0	0	0	0	0	0	0	0	0	0	0	0	0	0	0	0	0	0	0	0	0	0	0	0	0	0	0	0	0	0	0	0
CSAMAETGRNQPQHF	0.00137461	4	0	0	0	0	0	0		0	0	0	0	0	0	0	0	0	0	0	0	0	0	0	0	0	0	0	0	0	0	0	0	0	0	0	0	0	0	0	0	0	0	0	0	0	0	0	0
CASSLSGAHYYGYTF	0.00255381	4	0	0	0	0	0	0		0	0	0	0	0	0	0	0	0	0	0	0	0	0	0	0	0	0	0	0	0	0	0	0	0	0	0	0	0	0	0	0	0	0	0	0	0	0	0	0
CASSSRGPETQYF	0.00040154	3	0	0	0	0	0	0		0	0	0	0	0	0	0	0	0	0	0	0	0	0	0	0	0	0	0	0	0	0	0	0	0	0	0	0	0	0	0	0	0	0	0	0	0	0	1.096e-05	0
CASSLVYRGGTEAFF	0.00127292	3	0	0	0	0	0	0		0	0	0	0	0	0	0	0	0	0	0	0	0	0	0	0	0	0	0	0	0	0	0	0	0	0	0	0	0	0	0	0	0	0	0	0	0	0	0	0
CASSFIGLGNGAGELFF	0.00094919	2	0	0	0	0	0	0		0	0	0	0	0	0	0	0	0	0	0	0	0	0	0	0	0	0	0	0	0	0	0	0	0	0	0	0	0	0	0	0	0	0	0	0	0	0	0	0
CASSSLVFWTEGPYNEQFF	0.00213006	6	0	0	0	0	0	0		0	0	0	0	0	0	0	0	0	0	0	0	0	0	0	0	0	0	0	0	0	0	0	0	0	0	0	0	0	0	0	0	0	0	0	0	0	0	0	0
CASSLDSGTEAFF	0.00080829	3	0	1.163e-05	0	0	0	0		0	0	0	0	0	0	0	0	0	0	0	0	0	0	0	0	0	0	0	0	0	0	0	0	0	0	0	0	0	0	0	0	0	0	0	0	0	0	0	0
CASSQELRGSTYGYTF	0.00121081	3	0	0	0	0	0	0		0	0	0	0	0	0	0	0	0	0	0	0	0	0	0	0	0	0	0	0	0	0	0	0	0	0	0	0	0	0	0	0	0	0	0	0	0	0	0	0
CASSFFGAISTDTQYF	0.00042359	3	0	0	0	0	0	0		0	0	0	0	0	0	0	0	0	0	0	0	0	0	0	0	0	0	0	0	0	0	0	0	0	0	0	0	0	0	0	0	0	0	0	0	0	0	0	0
CASSLGDTQYF	0.00389041	25	5.11e-05	4.652e-05	4.688e-05	6.538e-05	1.22826e-05	5.6212e-06		0	0	0	0	1.904e-05	3.128e-05	0.002849	0	0	0	0	6.513e-05	0	0	0	0	3.409e-05	1.842e-05	0	0	0	0	3.762e-05	2.322e-05	0	0	0	0	0	3.591e-05	4.584e-05	1.476e-05	0	0	0	0	0	1.585e-05	2.192e-05	0
CASSHRVNQPQHF	0.00042814	4	0	0	0	0	0	0		0	0	0	0	0	0	0	0	0	0	0	2.171e-05	0	0	0	0	0	0	0	0	0	0	0	0	0	0	0	0	0	0	0	0	0	0	0	0	0	0	0	0
CASSGWTGSTDTQYF	0.00040643	3	0	0	0	0	0	0		0	0	0	0	0	0	0	0	0	0	0	0	0	0	0	0	0	0	0	0	0	0	0	0	0	0	0	0	0	0	0	0	0	0	0	0	0	0	0	0
CSARPGSYNEQFF	0.00024643	2	0	0	0	0	0	0		0	0	0	0	0	0	0	0	0	0	0	0	0	0	0	0	0	0	0	0	0	0	0	0	0	0	0	0	0	0	0	0	0	0	0	0	0	0	0	0
CASSPPAQGNGYTF	0.00024643	2	0	0	0	0	0	0		0	0	0	0	0	0	0	0	0	0	0	0	0	0	0	0	0	0	0	0	0	0	0	0	0	0	0	0	0	0	0	0	0	0	0	0	0	0	0	0
CSARSGTGEFEQYF	0.00032415	2	0	0	0	0	0	0		0	0	0	0	0	0	0	0	0	0	0	0	0	0	0	0	0	0	0	0	0	0	0	0	0	0	0	0	0	0	0	0	0	0	0	0	0	0	0	0
CASSQNGGGFDEQYF	0.00032415	2	0	0	0	0	0	0		0	0	0	0	0	0	0	0	0	0	0	0	0	0	0	0	0	0	0	0	0	0	0	0	0	0	0	0	0	0	0	0	0	0	0	0	0	0	0	0
CASSQDYSDNQPQHF	0.00063592	2	0	0	0	0	0	0		0	0	0	0	0	0	0	0	0	0	0	0	0	0	0	0	0	0	0	0	0	0	0	0	0	0	0	0	0	0	0	0	0	0	0	0	0	0	0	0
CASSLELGGGELFF	0.00063592	2	0	0	0	0	0	0		0	0	0	0	0	0	0	0	0	0	0	0	0	0	0	0	0	0	0	0	0	0	0	0	0	0	0	0	0	0	0	0	0	0	0	0	0	0	0	0
CASSLAGGQETQYF	0.00095512	19	7.155e-05	2.326e-05	4.688e-05	4.903e-05	0	1.12424e-05		0	0	0	0	3.808e-05	3.128e-05	0	0	0	0	3.401e-05	0	0	0	0	0	1.704e-05	0	0	0	0	0	0	0	0	0	0	0	0	3.591e-05	2.292e-05	4.427e-05	5.964e-05	0	0	0	0	0	1.096e-05	0
CASSPTDTQYF	0.00057904	16	1.022e-05	1.744e-05	3.349e-05	8.17e-06	0	0		0	0	0	0	0	1.043e-05	0	0	0	0	0	0	0	0	0	0	1.704e-05	0	0	0	0	0	1.881e-05	0	0	0	0	0	0	0	1.146e-05	1.476e-05	0	0	0	0	0	1.585e-05	1.096e-05	0
CASRRNEKLFF	0.0004078	6	1.022e-05	1.163e-05	6.7e-06	0	3.68478e-05	0.000146151		0	0	0	0	0	1.043e-05	0	0	0	0	0	0	0	0	0	0	0	0	0	0	0	0	0	0	0	0	0	0	0	0	0	0	0	0	0	0	0	0	0	0
CASSLTFTGELFF	0.00027753	3	0	0	0	0	0	0		0	0	0	0	0	0	0	0	0	0	0	0	0	0	0	0	0	0	0	0	0	0	0	0	0	0	0	0	0	0	0	0	0	0	0	0	0	0	0	0
CASSTRHSGVYEQYF	0.00026173	2	0	0	0	0	0	0		0	0	0	0	0	0	0	0	0	0	0	0	0	0	0	0	0	0	0	0	0	0	0	0	0	0	0	0	0	0	0	0	0	0	0	0	0	0	0	0
CASSQGAGRTYNEQFF	0.00026173	2	0	0	0	0	0	0		0	0	0	0	0	0	0	0	0	0	0	0	0	0	0	0	0	0	0	0	0	0	0	0	0	0	0	0	0	0	0	0	0	0	0	0	0	0	0	0
CASSLSSANPGETQYF	0.00026173	2	0	0	0	0	0	0		0	0	0	0	0	0	0	0	0	0	0	0	0	0	0	0	0	0	0	0	0	0	0	0	0	0	0	0	0	0	0	0	0	0	0	0	0	0	0	0
CASSLDTGWGSNQPQHF	0.00026173	2	0	0	0	0	0	0		0	0	0	0	0	0	0	0	0	0	0	0	0	0	0	0	0	0	0	0	0	0	0	0	0	0	0	0	0	0	0	0	0	0	0	0	0	0	0	0
CARSLTSGDQETQYF	0.00026173	2	0	0	0	0	0	0		0	0	0	0	0	0	0	0	0	0	0	0	0	0	0	0	0	0	0	0	0	0	0	0	0	0	0	0	0	0	0	0	0	0	0	0	0	0	0	0
CASSPRLAGGRNEQFF	0.00088505	3	0	0	0	0	0	0		0	0	0	0	0	0	0	0	0	0	0	2.171e-05	0	0	0	0	0	0	0	0	0	0	0	0	0	0	0	0	0	0	0	0	0	0	0	0	0	0	0	0
CAWNARTGYSSYNSPLHF	0.00086334	2	0	0	0	0	0	0		0	0	0	0	0	0	0	0	0	0	0	0	0	0	0	0	0	0	0	0	0	0	0	0	0	0	0	0	0	0	0	0	0	0	0	0	0	0	0	0
CASSLNTDTQYF	0.00063747	18	5.11e-05	5.81e-06	3.349e-05	3.269e-05	0	0		0	0	0	0	1.904e-05	1.043e-05	0	0	0	0	0	0	0	0	0	0	1.704e-05	3.684e-05	0	0	0	0	0	1.161e-05	0	0	0	0	0	8.978e-05	4.584e-05	0	0	0	0	0	0	3.171e-05	2.192e-05	0
CASSLLETQYF	0.00029115	12	0	1.163e-05	6.7e-06	1.634e-05	0	0		0	0	0	0	0	3.128e-05	0	0	0	0	1.701e-05	0	0	0	0	0	0	1.842e-05	0	0	0	0	0	1.161e-05	0	0	0	0	0	0	3.438e-05	1.476e-05	0	0	0	0	0	0	0	0
CASSLGQGGTEAFF	0.00066442	11	1.022e-05	5.81e-06	1.339e-05	1.634e-05	9.82608e-05	5.05908e-05		0	0	0	0	0	0	0	0	0	0	0	0	0	0	0	0	1.704e-05	0	0	0	0	0	0	2.322e-05	0	0	0	0	0	0	1.146e-05	0	0	0	0	0	0	0	0	0
CASSWGNTEAFF	0.0056438	10	0	2.326e-05	6.7e-06	8.17e-06	0.000601847	0.000219227		0	0	0	0	0	1.043e-05	0	0	0	0	0	0	0	0	0	0.00529101	0	0	0	0	0	0	0	0	0	0	0	0	0	1.796e-05	2.292e-05	0	0	0	0	0	0	0	0	0
CASSQSSYEQYF	0.0002135	9	0	1.163e-05	6.7e-06	1.634e-05	0	0		0	0	0	0	0	2.085e-05	0	0	0	0	0	0	0	0	0	0	0	0	0	0	0	0	0	0	0	0	0	0	2.089e-05	0	1.146e-05	0	0	0	0	0	0	0	1.096e-05	0
CASSPGQTYEQYF	0.00024057	9	0	5.81e-06	2.009e-05	0	0	0		0	0	0	0	0	0	0	0	0	0	3.401e-05	0	0	0	0	0	0	1.842e-05	0	0	0	0	0	1.161e-05	0	0	0	0	0	0	0	0	1.988e-05	0	0	0	0	0	0	0
CASSPSQETQYF	0.00024788	8	1.022e-05	1.744e-05	2.679e-05	2.452e-05	0	5.6212e-06		0	0	0	0	0	0	0	0	0	0	3.401e-05	0	0	0	0	0	0	0	0	0	0	0	0	0	0	0	0	0	0	0	0	0	0	0	0	0	0	0	0	0
CASSLLGNTEAFF	0.00023826	8	2.044e-05	5.81e-06	2.009e-05	8.17e-06	0	0		0	0	0	0	0	0	0	0	0	0	0	0	0	0	0	0	0	0	0	0	0	0	0	0	0	0	0	0	0	0	3.438e-05	1.476e-05	0	0	0	0	0	0	3.288e-05	0
CASSHYEQYF	0.00023196	8	2.044e-05	0	1.339e-05	1.634e-05	0	5.6212e-06		0	0	0	0	0	0	0	0	0	0	0	2.171e-05	0	0	0	0	0	0	0	0	0	0	0	2.322e-05	0	0	0	0	0	0	0	0	0	0	0	0	0	0	2.192e-05	0
CASSSRDSSYEQYF	0.00020785	7	1.022e-05	1.744e-05	0	0	0	0		0	0	0	0	0	0	0	0	0	0	3.401e-05	0	0	0	0	0	0	0	0	0	0	0	0	0	0	0	0	0	0	0	0	0	0	0	0	0	0	0	0	0
CASSFNSNQPQHF	0.00020241	6	0	0	0	8.17e-06	0	0		0	0	0	0	0	0	0	0	0	0	0	0	0	0	0	0	0	0	0	0	0	0	1.881e-05	3.483e-05	0	0	0	0	0	0	2.292e-05	0	0	0	0	0	0	0	0	0
CASSLGSYNSPLHF	0.00014899	5	1.022e-05	0	0	8.17e-06	0	0		0	0	0	0	0	0	0	0	0	0	1.701e-05	0	0	0	0	0	0	0	0	0	0	0	0	0	0	0	0	0	0	0	0	0	0	0	0	0	0	0	0	0
CATSRDGGKEETQYF	0.00258496	4	0	0	6.7e-06	0	8.59782e-05	4.49696e-05		0	0	0	0	0	0	0	0	0	0	0	0	0	0	0	0	0	0	0	0	0	0	0	0	0	0	0	0	0	0	0	0	0	0	0	0	0	0	0	0
CASSYVQGSQPQHF	0.0001257	4	0	5.81e-06	6.7e-06	0	0	0		0	0	0	0	0	0	0	0	0	0	0	0	0	0	0	0	0	0	0	0	0	0	0	0	0	0	0	0	0	0	1.146e-05	0	0	0	0	0	0	0	0	0
CASSTGVNQPQHF	0.00014882	4	0	0	0	0	0	0		0	0	0	0	0	0	0	0	0	0	0	0	0	0	0	0	0	0	0	0	0	0	0	0	0	0	0	0	0	0	0	0	0	0	0	0	0	1.585e-05	0	0
CASSPGAQETQYF	0.0001408	4	0	0	0	8.17e-06	0	0		0	0	0	0	1.904e-05	0	0	0	0	0	0	0	0	0	0	0	0	0	0	0	0	0	0	0	0	0	0	0	0	0	0	0	0	0	0	0	0	0	0	0
CASSLVDEAFF	0.00013189	4	0	0	6.7e-06	0	0	0		0	0	0	0	0	0	0	0	0	0	0	0	0	0	0	0	0	0	0	0	0	0	0	1.161e-05	0	0	0	0	0	0	0	0	0	0	0	0	0	0	0	0
CASSLGVTSTDTQYF	0.00013502	4	0	5.81e-06	0	0	0	0		0	0	0	0	0	1.043e-05	0	0	0	0	0	0	0	0	0	0	1.704e-05	0	0	0	0	0	0	0	0	0	0	0	0	0	0	0	0	0	0	0	0	0	0	0
CSARSTDTQYF	0.00014057	3	0	0	0	0	0	0		0	0	0	0	0	0	0	0	0	0	0	0	0	0	0	0	0	0	0	0	0	0	0	0	0	0	0	0	2.089e-05	1.796e-05	0	0	0	0	0	0	0	0	0	0
CASSQDQRGGTDTQYF	0.00012639	3	0	0	0	0	0	0		0	0	0	0	0	0	0	0	0	0	0	0	0	0	0	0	0	0	0	0	0	0	0	0	0	0	0	0	0	0	1.146e-05	0	0	0	0	0	0	0	0	0
CASSPVGGQPQHF	0.00012291	3	1.022e-05	0	0	0	0	0		0	0	0	0	0	0	0	0	0	0	0	0	0	0	0	0	0	0	0	0	0	0	0	0	0	0	0	0	0	0	0	0	0	0	0	0	0	0	1.096e-05	0
CASSLVSGYGYTF	0.00012759	3	0	0	0	0	0	0		0	0	0	0	0	1.043e-05	0	0	0	0	0	0	0	0	0	0	0	0	0	0	0	0	0	0	0	0	0	0	0	0	0	0	0	0	0	0	0	0	0	0
CASSLGAANTEAFF	0.00012028	3	0	0	6.7e-06	0	0	1.12424e-05		0	0	0	0	0	0	0	0	0	0	0	0	0	0	0	0	0	0	0	0	0	0	0	0	0	0	0	0	0	0	0	0	0	0	0	0	0	0	0	0
CASSLDLAKNIQYF	0.00012033	3	0	0	0	8.17e-06	0	0		0	0	0	0	0	1.043e-05	0	0	0	0	0	0	0	0	0	0	0	0	0	0	0	0	0	0	0	0	0	0	0	0	0	0	0	0	0	0	0	0	0	0
CASSFAGNYGYTF	0.00012075	3	0	5.81e-06	0	0	0	0		0	0	0	0	0	0	0	0	0	0	0	0	0	0	0	0	0	0	0	0	0	0	0	0	0	0	0	0	0	0	0	0	0	0	0	0	0	0	0	0
CSARTRGTDTQYF	0.00011269	2	0	0	0	0	0	0		0	0	0	0	0	0	0	0	0	0	0	0	0	0	0	0	0	0	0	0	0	0	0	0	0	0	0	0	0	0	0	0	0	0	0	0	0	0	1.096e-05	0
CSARATGGYEQYF	0.00010843	2	0	0	6.7e-06	0	0	0		0	0	0	0	0	0	0	0	0	0	0	0	0	0	0	0	0	0	0	0	0	0	0	0	0	0	0	0	0	0	0	0	0	0	0	0	0	0	0	0
CSARAGGGTDTQYF	0.00011269	2	0	0	0	0	0	0		0	0	0	0	0	0	0	0	0	0	0	0	0	0	0	0	0	0	0	0	0	0	0	0	0	0	0	0	0	0	0	0	0	0	0	0	0	0	1.096e-05	0
CASSYGTANTGELFF	0.00010843	2	0	0	6.7e-06	0	0	0		0	0	0	0	0	0	0	0	0	0	0	0	0	0	0	0	0	0	0	0	0	0	0	0	0	0	0	0	0	0	0	0	0	0	0	0	0	0	0	0
CASSVGQQETQYF	0.00011648	2	0	0	0	0	0	0		0	0	0	0	0	0	0	0	0	0	0	0	0	0	0	0	0	0	0	0	0	0	0	0	0	0	0	0	0	0	0	1.476e-05	0	0	0	0	0	0	0	0
CASSSDRGDSYNEQFF	0.0001099	2	0	0	0	8.17e-06	0	0		0	0	0	0	0	0	0	0	0	0	0	0	0	0	0	0	0	0	0	0	0	0	0	0	0	0	0	0	0	0	0	0	0	0	0	0	0	0	0	0
CASSPGTGLNYGYTF	0.00011216	2	0	0	0	0	0	0		0	0	0	0	0	1.043e-05	0	0	0	0	0	0	0	0	0	0	0	0	0	0	0	0	0	0	0	0	0	0	0	0	0	0	0	0	0	0	0	0	0	0
CASSNRGGYTF	0.00010843	2	0	0	6.7e-06	0	0	0		0	0	0	0	0	0	0	0	0	0	0	0	0	0	0	0	0	0	0	0	0	0	0	0	0	0	0	0	0	0	0	0	0	0	0	0	0	0	0	0
CASSLWGEKLFF	0.00011877	2	0	0	0	0	0	0		0	0	0	0	0	0	0	0	0	0	0	0	0	0	0	0	1.704e-05	0	0	0	0	0	0	0	0	0	0	0	0	0	0	0	0	0	0	0	0	0	0	0
CASSLVPGDYEQYF	0.00010754	2	0	5.81e-06	0	0	0	0		0	0	0	0	0	0	0	0	0	0	0	0	0	0	0	0	0	0	0	0	0	0	0	0	0	0	0	0	0	0	0	0	0	0	0	0	0	0	0	0
CASSLVDSTDTQYF	0.00011768	2	0	0	0	0	0	0		0	0	0	0	0	0	0	0	0	0	0	0	0	0	0	0	0	0	0	0	0	0	0	0	0	0	0	0	0	0	0	0	0	0	0	0	0	0	0	0
CASSLPGENIQYF	0.00011195	2	1.022e-05	0	0	0	0	0		0	0	0	0	0	0	0	0	0	0	0	0	0	0	0	0	0	0	0	0	0	0	0	0	0	0	0	0	0	0	0	0	0	0	0	0	0	0	0	0
CASSLGPATDTQYF	0.00010843	2	0	0	6.7e-06	0	0	0		0	0	0	0	0	0	0	0	0	0	0	0	0	0	0	0	0	0	0	0	0	0	0	0	0	0	0	0	0	0	0	0	0	0	0	0	0	0	0	0
CASSLERATYEQYF	0.00011359	2	0	0	0	0	0	0		0	0	0	0	0	0	0	0	0	0	0	0	0	0	0	0	0	0	0	0	0	0	0	0	0	0	0	0	0	0	0	0	0	0	0	0	0	0	0	0
CASSLDLAGSTDTQYF	0.00012015	2	0	0	0	0	0	0		0	0	0	0	0	0	0	0	0	0	0	0	0	0	0	0	0	1.842e-05	0	0	0	0	0	0	0	0	0	0	0	0	0	0	0	0	0	0	0	0	0	0
CASSGGQVNTEAFF	0.00011334	2	0	0	0	0	0	0		0	0	0	0	0	0	0	0	0	0	0	0	0	0	0	0	0	0	0	0	0	0	0	1.161e-05	0	0	0	0	0	0	0	0	0	0	0	0	0	0	0	0
CASSFGDGSYEQYF	0.00012077	2	0	0	0	0	0	0		0	0	0	0	1.904e-05	0	0	0	0	0	0	0	0	0	0	0	0	0	0	0	0	0	0	0	0	0	0	0	0	0	0	0	0	0	0	0	0	0	0	0
CASSFGAGGYNEQFF	0.00010754	2	0	5.81e-06	0	0	0	0		0	0	0	0	0	0	0	0	0	0	0	0	0	0	0	0	0	0	0	0	0	0	0	0	0	0	0	0	0	0	0	0	0	0	0	0	0	0	0	0
CASRLEGGYEQYF	0.00011758	2	0	0	0	0	0	0		0	0	0	0	0	0	0	0	0	0	0	0	0	0	0	0	0	0	0	0	0	0	0	0	0	0	0	0	0	0	0	0	0	0	0	0	0	1.585e-05	0	0
CSVEEQGGGGPQHF	0.00010173	1	0	0	0	0	0	0		0	0	0	0	0	0	0	0	0	0	0	0	0	0	0	0	0	0	0	0	0	0	0	0	0	0	0	0	0	0	0	0	0	0	0	0	0	0	0	0
CSVDSGTYNEQFF	0.00010173	1	0	0	0	0	0	0		0	0	0	0	0	0	0	0	0	0	0	0	0	0	0	0	0	0	0	0	0	0	0	0	0	0	0	0	0	0	0	0	0	0	0	0	0	0	0	0
CSPGVGDGQADGYTF	0.00010173	1	0	0	0	0	0	0		0	0	0	0	0	0	0	0	0	0	0	0	0	0	0	0	0	0	0	0	0	0	0	0	0	0	0	0	0	0	0	0	0	0	0	0	0	0	0	0
CSGSGTRLGNEQFF	0.00010173	1	0	0	0	0	0	0		0	0	0	0	0	0	0	0	0	0	0	0	0	0	0	0	0	0	0	0	0	0	0	0	0	0	0	0	0	0	0	0	0	0	0	0	0	0	0	0
CSGRTFNEQFF	0.00010173	1	0	0	0	0	0	0		0	0	0	0	0	0	0	0	0	0	0	0	0	0	0	0	0	0	0	0	0	0	0	0	0	0	0	0	0	0	0	0	0	0	0	0	0	0	0	0
CSAYAWSSYNEQFF	0.00010173	1	0	0	0	0	0	0		0	0	0	0	0	0	0	0	0	0	0	0	0	0	0	0	0	0	0	0	0	0	0	0	0	0	0	0	0	0	0	0	0	0	0	0	0	0	0	0
CSATWAGVRGGYTF	0.00010173	1	0	0	0	0	0	0		0	0	0	0	0	0	0	0	0	0	0	0	0	0	0	0	0	0	0	0	0	0	0	0	0	0	0	0	0	0	0	0	0	0	0	0	0	0	0	0
CSATNTGTSGRPYNEQFF	0.00010173	1	0	0	0	0	0	0		0	0	0	0	0	0	0	0	0	0	0	0	0	0	0	0	0	0	0	0	0	0	0	0	0	0	0	0	0	0	0	0	0	0	0	0	0	0	0	0
CSATLTRGPEAFF	0.00010173	1	0	0	0	0	0	0		0	0	0	0	0	0	0	0	0	0	0	0	0	0	0	0	0	0	0	0	0	0	0	0	0	0	0	0	0	0	0	0	0	0	0	0	0	0	0	0
CSASTGTRNGGAQYF	0.00010173	1	0	0	0	0	0	0		0	0	0	0	0	0	0	0	0	0	0	0	0	0	0	0	0	0	0	0	0	0	0	0	0	0	0	0	0	0	0	0	0	0	0	0	0	0	0	0
CSASSYGVSYNEQFF	0.00010173	1	0	0	0	0	0	0		0	0	0	0	0	0	0	0	0	0	0	0	0	0	0	0	0	0	0	0	0	0	0	0	0	0	0	0	0	0	0	0	0	0	0	0	0	0	0	0
CSASSGGREQYF	0.00010173	1	0	0	0	0	0	0		0	0	0	0	0	0	0	0	0	0	0	0	0	0	0	0	0	0	0	0	0	0	0	0	0	0	0	0	0	0	0	0	0	0	0	0	0	0	0	0
CSASRLATQYF	0.00010173	1	0	0	0	0	0	0		0	0	0	0	0	0	0	0	0	0	0	0	0	0	0	0	0	0	0	0	0	0	0	0	0	0	0	0	0	0	0	0	0	0	0	0	0	0	0	0
CSASLAPGQTTGLAGIVYNEQFF	0.00010173	1	0	0	0	0	0	0		0	0	0	0	0	0	0	0	0	0	0	0	0	0	0	0	0	0	0	0	0	0	0	0	0	0	0	0	0	0	0	0	0	0	0	0	0	0	0	0
CSASIQTSYNEQFF	0.00010173	1	0	0	0	0	0	0		0	0	0	0	0	0	0	0	0	0	0	0	0	0	0	0	0	0	0	0	0	0	0	0	0	0	0	0	0	0	0	0	0	0	0	0	0	0	0	0
CSASEQGVGEAFF	0.00010173	1	0	0	0	0	0	0		0	0	0	0	0	0	0	0	0	0	0	0	0	0	0	0	0	0	0	0	0	0	0	0	0	0	0	0	0	0	0	0	0	0	0	0	0	0	0	0
CSARWREGLFLAQFF	0.00010173	1	0	0	0	0	0	0		0	0	0	0	0	0	0	0	0	0	0	0	0	0	0	0	0	0	0	0	0	0	0	0	0	0	0	0	0	0	0	0	0	0	0	0	0	0	0	0
CSARTGNYNEQFF	0.00010173	1	0	0	0	0	0	0		0	0	0	0	0	0	0	0	0	0	0	0	0	0	0	0	0	0	0	0	0	0	0	0	0	0	0	0	0	0	0	0	0	0	0	0	0	0	0	0
CSARSERDSRTDTQYF	0.00010173	1	0	0	0	0	0	0		0	0	0	0	0	0	0	0	0	0	0	0	0	0	0	0	0	0	0	0	0	0	0	0	0	0	0	0	0	0	0	0	0	0	0	0	0	0	0	0
CSARPSGVGNEQFF	0.00010173	1	0	0	0	0	0	0		0	0	0	0	0	0	0	0	0	0	0	0	0	0	0	0	0	0	0	0	0	0	0	0	0	0	0	0	0	0	0	0	0	0	0	0	0	0	0	0
CSARNPLSETQYF	0.00010173	1	0	0	0	0	0	0		0	0	0	0	0	0	0	0	0	0	0	0	0	0	0	0	0	0	0	0	0	0	0	0	0	0	0	0	0	0	0	0	0	0	0	0	0	0	0	0
CSARLGGHDANSPLHF	0.00010173	1	0	0	0	0	0	0		0	0	0	0	0	0	0	0	0	0	0	0	0	0	0	0	0	0	0	0	0	0	0	0	0	0	0	0	0	0	0	0	0	0	0	0	0	0	0	0
CSARLDRGLPSTDTQYF	0.00010173	1	0	0	0	0	0	0		0	0	0	0	0	0	0	0	0	0	0	0	0	0	0	0	0	0	0	0	0	0	0	0	0	0	0	0	0	0	0	0	0	0	0	0	0	0	0	0
CSARLAGYSYNEQFF	0.00010173	1	0	0	0	0	0	0		0	0	0	0	0	0	0	0	0	0	0	0	0	0	0	0	0	0	0	0	0	0	0	0	0	0	0	0	0	0	0	0	0	0	0	0	0	0	0	0
CSARGSSGSAYEQYF	0.00010173	1	0	0	0	0	0	0		0	0	0	0	0	0	0	0	0	0	0	0	0	0	0	0	0	0	0	0	0	0	0	0	0	0	0	0	0	0	0	0	0	0	0	0	0	0	0	0
CSARGRDTLNYGYTF	0.00010173	1	0	0	0	0	0	0		0	0	0	0	0	0	0	0	0	0	0	0	0	0	0	0	0	0	0	0	0	0	0	0	0	0	0	0	0	0	0	0	0	0	0	0	0	0	0	0
CSARDQQQPNYGYTF	0.00010173	1	0	0	0	0	0	0		0	0	0	0	0	0	0	0	0	0	0	0	0	0	0	0	0	0	0	0	0	0	0	0	0	0	0	0	0	0	0	0	0	0	0	0	0	0	0	0
CSARDPNGRSSYEQYF	0.00010173	1	0	0	0	0	0	0		0	0	0	0	0	0	0	0	0	0	0	0	0	0	0	0	0	0	0	0	0	0	0	0	0	0	0	0	0	0	0	0	0	0	0	0	0	0	0	0
CSARDLRAQGPQHF	0.00010173	1	0	0	0	0	0	0		0	0	0	0	0	0	0	0	0	0	0	0	0	0	0	0	0	0	0	0	0	0	0	0	0	0	0	0	0	0	0	0	0	0	0	0	0	0	0	0
CSARDLKGPSEKLFF	0.00010173	1	0	0	0	0	0	0		0	0	0	0	0	0	0	0	0	0	0	0	0	0	0	0	0	0	0	0	0	0	0	0	0	0	0	0	0	0	0	0	0	0	0	0	0	0	0	0
CSARDLEGTYEQYF	0.00010173	1	0	0	0	0	0	0		0	0	0	0	0	0	0	0	0	0	0	0	0	0	0	0	0	0	0	0	0	0	0	0	0	0	0	0	0	0	0	0	0	0	0	0	0	0	0	0
CSARDGGAQHYNEQFF	0.00010173	1	0	0	0	0	0	0		0	0	0	0	0	0	0	0	0	0	0	0	0	0	0	0	0	0	0	0	0	0	0	0	0	0	0	0	0	0	0	0	0	0	0	0	0	0	0	0
CSAPTGASYGYTF	0.00010173	1	0	0	0	0	0	0		0	0	0	0	0	0	0	0	0	0	0	0	0	0	0	0	0	0	0	0	0	0	0	0	0	0	0	0	0	0	0	0	0	0	0	0	0	0	0	0
CSAPSGGTAGANVLTF	0.00010173	1	0	0	0	0	0	0		0	0	0	0	0	0	0	0	0	0	0	0	0	0	0	0	0	0	0	0	0	0	0	0	0	0	0	0	0	0	0	0	0	0	0	0	0	0	0	0
CSAPHRGLASYNEQFF	0.00010173	1	0	0	0	0	0	0		0	0	0	0	0	0	0	0	0	0	0	0	0	0	0	0	0	0	0	0	0	0	0	0	0	0	0	0	0	0	0	0	0	0	0	0	0	0	0	0
CSALTPGGDYGYTF	0.00010173	1	0	0	0	0	0	0		0	0	0	0	0	0	0	0	0	0	0	0	0	0	0	0	0	0	0	0	0	0	0	0	0	0	0	0	0	0	0	0	0	0	0	0	0	0	0	0
CSAKVWGRANYGYTF	0.00010173	1	0	0	0	0	0	0		0	0	0	0	0	0	0	0	0	0	0	0	0	0	0	0	0	0	0	0	0	0	0	0	0	0	0	0	0	0	0	0	0	0	0	0	0	0	0	0
CSAKTENTEAFF	0.00010173	1	0	0	0	0	0	0		0	0	0	0	0	0	0	0	0	0	0	0	0	0	0	0	0	0	0	0	0	0	0	0	0	0	0	0	0	0	0	0	0	0	0	0	0	0	0	0
CSAKDLKGPSEKLFF	0.00010173	1	0	0	0	0	0	0		0	0	0	0	0	0	0	0	0	0	0	0	0	0	0	0	0	0	0	0	0	0	0	0	0	0	0	0	0	0	0	0	0	0	0	0	0	0	0	0
CSAEGQGATLEQYF	0.00010173	1	0	0	0	0	0	0		0	0	0	0	0	0	0	0	0	0	0	0	0	0	0	0	0	0	0	0	0	0	0	0	0	0	0	0	0	0	0	0	0	0	0	0	0	0	0	0
CSAAPSGGKRELFF	0.00010173	1	0	0	0	0	0	0		0	0	0	0	0	0	0	0	0	0	0	0	0	0	0	0	0	0	0	0	0	0	0	0	0	0	0	0	0	0	0	0	0	0	0	0	0	0	0	0
CPQGGRDYGYTF	0.00010173	1	0	0	0	0	0	0		0	0	0	0	0	0	0	0	0	0	0	0	0	0	0	0	0	0	0	0	0	0	0	0	0	0	0	0	0	0	0	0	0	0	0	0	0	0	0	0
CAWVGGWGIGTEAFF	0.00010173	1	0	0	0	0	0	0		0	0	0	0	0	0	0	0	0	0	0	0	0	0	0	0	0	0	0	0	0	0	0	0	0	0	0	0	0	0	0	0	0	0	0	0	0	0	0	0
CAWSVRGGTQYF	0.00010173	1	0	0	0	0	0	0		0	0	0	0	0	0	0	0	0	0	0	0	0	0	0	0	0	0	0	0	0	0	0	0	0	0	0	0	0	0	0	0	0	0	0	0	0	0	0	0
CAWSVGGHGYTF	0.00010173	1	0	0	0	0	0	0		0	0	0	0	0	0	0	0	0	0	0	0	0	0	0	0	0	0	0	0	0	0	0	0	0	0	0	0	0	0	0	0	0	0	0	0	0	0	0	0
CATTPGDRGRGQPQHF	0.00010173	1	0	0	0	0	0	0		0	0	0	0	0	0	0	0	0	0	0	0	0	0	0	0	0	0	0	0	0	0	0	0	0	0	0	0	0	0	0	0	0	0	0	0	0	0	0	0
CATSRSVLGGEFTDTQYF	0.00010173	1	0	0	0	0	0	0		0	0	0	0	0	0	0	0	0	0	0	0	0	0	0	0	0	0	0	0	0	0	0	0	0	0	0	0	0	0	0	0	0	0	0	0	0	0	0	0
CATSREPQGEDTQYF	0.00010173	1	0	0	0	0	0	0		0	0	0	0	0	0	0	0	0	0	0	0	0	0	0	0	0	0	0	0	0	0	0	0	0	0	0	0	0	0	0	0	0	0	0	0	0	0	0	0
CATSREGQGPTAQHF	0.00010173	1	0	0	0	0	0	0		0	0	0	0	0	0	0	0	0	0	0	0	0	0	0	0	0	0	0	0	0	0	0	0	0	0	0	0	0	0	0	0	0	0	0	0	0	0	0	0
CATSKGAPELYEQYF	0.00010173	1	0	0	0	0	0	0		0	0	0	0	0	0	0	0	0	0	0	0	0	0	0	0	0	0	0	0	0	0	0	0	0	0	0	0	0	0	0	0	0	0	0	0	0	0	0	0
CATSGQGRTYEQYF	0.00010173	1	0	0	0	0	0	0		0	0	0	0	0	0	0	0	0	0	0	0	0	0	0	0	0	0	0	0	0	0	0	0	0	0	0	0	0	0	0	0	0	0	0	0	0	0	0	0
CATSEGQGKTNEKLFF	0.00010173	1	0	0	0	0	0	0		0	0	0	0	0	0	0	0	0	0	0	0	0	0	0	0	0	0	0	0	0	0	0	0	0	0	0	0	0	0	0	0	0	0	0	0	0	0	0	0
CATSDPTGGFTDTQYF	0.00010173	1	0	0	0	0	0	0		0	0	0	0	0	0	0	0	0	0	0	0	0	0	0	0	0	0	0	0	0	0	0	0	0	0	0	0	0	0	0	0	0	0	0	0	0	0	0	0
CATSDPLGGQGMETQYF	0.00010173	1	0	0	0	0	0	0		0	0	0	0	0	0	0	0	0	0	0	0	0	0	0	0	0	0	0	0	0	0	0	0	0	0	0	0	0	0	0	0	0	0	0	0	0	0	0	0
CATRPDISNQPQHF	0.00010173	1	0	0	0	0	0	0		0	0	0	0	0	0	0	0	0	0	0	0	0	0	0	0	0	0	0	0	0	0	0	0	0	0	0	0	0	0	0	0	0	0	0	0	0	0	0	0
CATRKTDSYEQYF	0.00010173	1	0	0	0	0	0	0		0	0	0	0	0	0	0	0	0	0	0	0	0	0	0	0	0	0	0	0	0	0	0	0	0	0	0	0	0	0	0	0	0	0	0	0	0	0	0	0
CASYGVYEQYF	0.00010173	1	0	0	0	0	0	0		0	0	0	0	0	0	0	0	0	0	0	0	0	0	0	0	0	0	0	0	0	0	0	0	0	0	0	0	0	0	0	0	0	0	0	0	0	0	0	0
CASTYPDRVGEQFF	0.00010173	1	0	0	0	0	0	0		0	0	0	0	0	0	0	0	0	0	0	0	0	0	0	0	0	0	0	0	0	0	0	0	0	0	0	0	0	0	0	0	0	0	0	0	0	0	0	0
CASTVLAGSTDTQYF	0.00010173	1	0	0	0	0	0	0		0	0	0	0	0	0	0	0	0	0	0	0	0	0	0	0	0	0	0	0	0	0	0	0	0	0	0	0	0	0	0	0	0	0	0	0	0	0	0	0
CASTSSYGTFNQPQHF	0.00010173	1	0	0	0	0	0	0		0	0	0	0	0	0	0	0	0	0	0	0	0	0	0	0	0	0	0	0	0	0	0	0	0	0	0	0	0	0	0	0	0	0	0	0	0	0	0	0
CASTRTSGGVGELFF	0.00010173	1	0	0	0	0	0	0		0	0	0	0	0	0	0	0	0	0	0	0	0	0	0	0	0	0	0	0	0	0	0	0	0	0	0	0	0	0	0	0	0	0	0	0	0	0	0	0
CASTPRPVQTQYF	0.00010173	1	0	0	0	0	0	0		0	0	0	0	0	0	0	0	0	0	0	0	0	0	0	0	0	0	0	0	0	0	0	0	0	0	0	0	0	0	0	0	0	0	0	0	0	0	0	0
CASTPGQGAGANVLTF	0.00010173	1	0	0	0	0	0	0		0	0	0	0	0	0	0	0	0	0	0	0	0	0	0	0	0	0	0	0	0	0	0	0	0	0	0	0	0	0	0	0	0	0	0	0	0	0	0	0
CASTIQGGPVNTEAFF	0.00010173	1	0	0	0	0	0	0		0	0	0	0	0	0	0	0	0	0	0	0	0	0	0	0	0	0	0	0	0	0	0	0	0	0	0	0	0	0	0	0	0	0	0	0	0	0	0	0
CASSYYPGRRDGYTF	0.00010173	1	0	0	0	0	0	0		0	0	0	0	0	0	0	0	0	0	0	0	0	0	0	0	0	0	0	0	0	0	0	0	0	0	0	0	0	0	0	0	0	0	0	0	0	0	0	0
CASSYSTIGGSYEQYF	0.00010173	1	0	0	0	0	0	0		0	0	0	0	0	0	0	0	0	0	0	0	0	0	0	0	0	0	0	0	0	0	0	0	0	0	0	0	0	0	0	0	0	0	0	0	0	0	0	0
CASSYSSGRGGSPLHF	0.00010173	1	0	0	0	0	0	0		0	0	0	0	0	0	0	0	0	0	0	0	0	0	0	0	0	0	0	0	0	0	0	0	0	0	0	0	0	0	0	0	0	0	0	0	0	0	0	0
CASSYSRDRGLGNTIYF	0.00010173	1	0	0	0	0	0	0		0	0	0	0	0	0	0	0	0	0	0	0	0	0	0	0	0	0	0	0	0	0	0	0	0	0	0	0	0	0	0	0	0	0	0	0	0	0	0	0
CASSYSPGTANEKLFF	0.00010173	1	0	0	0	0	0	0		0	0	0	0	0	0	0	0	0	0	0	0	0	0	0	0	0	0	0	0	0	0	0	0	0	0	0	0	0	0	0	0	0	0	0	0	0	0	0	0
CASSYSGRGFF	0.00010173	1	0	0	0	0	0	0		0	0	0	0	0	0	0	0	0	0	0	0	0	0	0	0	0	0	0	0	0	0	0	0	0	0	0	0	0	0	0	0	0	0	0	0	0	0	0	0
CASSYSGFGEKLFF	0.00010173	1	0	0	0	0	0	0		0	0	0	0	0	0	0	0	0	0	0	0	0	0	0	0	0	0	0	0	0	0	0	0	0	0	0	0	0	0	0	0	0	0	0	0	0	0	0	0
CASSYPTATEAFF	0.00010173	1	0	0	0	0	0	0		0	0	0	0	0	0	0	0	0	0	0	0	0	0	0	0	0	0	0	0	0	0	0	0	0	0	0	0	0	0	0	0	0	0	0	0	0	0	0	0
CASSYPSGDWGQETQYF	0.00010173	1	0	0	0	0	0	0		0	0	0	0	0	0	0	0	0	0	0	0	0	0	0	0	0	0	0	0	0	0	0	0	0	0	0	0	0	0	0	0	0	0	0	0	0	0	0	0
CASSYEEGTEAFF	0.00010173	1	0	0	0	0	0	0		0	0	0	0	0	0	0	0	0	0	0	0	0	0	0	0	0	0	0	0	0	0	0	0	0	0	0	0	0	0	0	0	0	0	0	0	0	0	0	0
CASSYDLGGGPSYNEQFF	0.00010173	1	0	0	0	0	0	0		0	0	0	0	0	0	0	0	0	0	0	0	0	0	0	0	0	0	0	0	0	0	0	0	0	0	0	0	0	0	0	0	0	0	0	0	0	0	0	0
CASSWTSNYGYTF	0.00010173	1	0	0	0	0	0	0		0	0	0	0	0	0	0	0	0	0	0	0	0	0	0	0	0	0	0	0	0	0	0	0	0	0	0	0	0	0	0	0	0	0	0	0	0	0	0	0
CASSWDRESGTEAFF	0.00010173	1	0	0	0	0	0	0		0	0	0	0	0	0	0	0	0	0	0	0	0	0	0	0	0	0	0	0	0	0	0	0	0	0	0	0	0	0	0	0	0	0	0	0	0	0	0	0
CASSWDGYYGYTF	0.00010173	1	0	0	0	0	0	0		0	0	0	0	0	0	0	0	0	0	0	0	0	0	0	0	0	0	0	0	0	0	0	0	0	0	0	0	0	0	0	0	0	0	0	0	0	0	0	0
CASSVWSGSPVEQFF	0.00010173	1	0	0	0	0	0	0		0	0	0	0	0	0	0	0	0	0	0	0	0	0	0	0	0	0	0	0	0	0	0	0	0	0	0	0	0	0	0	0	0	0	0	0	0	0	0	0
CASSVGRAGGQGTQYF	0.00010173	1	0	0	0	0	0	0		0	0	0	0	0	0	0	0	0	0	0	0	0	0	0	0	0	0	0	0	0	0	0	0	0	0	0	0	0	0	0	0	0	0	0	0	0	0	0	0
CASSVGERFTEAFF	0.00010173	1	0	0	0	0	0	0		0	0	0	0	0	0	0	0	0	0	0	0	0	0	0	0	0	0	0	0	0	0	0	0	0	0	0	0	0	0	0	0	0	0	0	0	0	0	0	0
CASSVEVALDSEQFF	0.00010173	1	0	0	0	0	0	0		0	0	0	0	0	0	0	0	0	0	0	0	0	0	0	0	0	0	0	0	0	0	0	0	0	0	0	0	0	0	0	0	0	0	0	0	0	0	0	0
CASSVDPGQGWTGELFF	0.00010173	1	0	0	0	0	0	0		0	0	0	0	0	0	0	0	0	0	0	0	0	0	0	0	0	0	0	0	0	0	0	0	0	0	0	0	0	0	0	0	0	0	0	0	0	0	0	0
CASSVDKRLNTGELFF	0.00010173	1	0	0	0	0	0	0		0	0	0	0	0	0	0	0	0	0	0	0	0	0	0	0	0	0	0	0	0	0	0	0	0	0	0	0	0	0	0	0	0	0	0	0	0	0	0	0
CASSVDHGPRDEQYF	0.00010173	1	0	0	0	0	0	0		0	0	0	0	0	0	0	0	0	0	0	0	0	0	0	0	0	0	0	0	0	0	0	0	0	0	0	0	0	0	0	0	0	0	0	0	0	0	0	0
CASSVDGSSGGPAADTQYF	0.00010173	1	0	0	0	0	0	0		0	0	0	0	0	0	0	0	0	0	0	0	0	0	0	0	0	0	0	0	0	0	0	0	0	0	0	0	0	0	0	0	0	0	0	0	0	0	0	0
CASSVARGGPREEQFF	0.00010173	1	0	0	0	0	0	0		0	0	0	0	0	0	0	0	0	0	0	0	0	0	0	0	0	0	0	0	0	0	0	0	0	0	0	0	0	0	0	0	0	0	0	0	0	0	0	0
CASSTTAGLMFNEQFF	0.00010173	1	0	0	0	0	0	0		0	0	0	0	0	0	0	0	0	0	0	0	0	0	0	0	0	0	0	0	0	0	0	0	0	0	0	0	0	0	0	0	0	0	0	0	0	0	0	0
CASSTSGTGIEAEQFF	0.00010173	1	0	0	0	0	0	0		0	0	0	0	0	0	0	0	0	0	0	0	0	0	0	0	0	0	0	0	0	0	0	0	0	0	0	0	0	0	0	0	0	0	0	0	0	0	0	0
CASSTNLWVGPSSYNEQFF	0.00010173	1	0	0	0	0	0	0		0	0	0	0	0	0	0	0	0	0	0	0	0	0	0	0	0	0	0	0	0	0	0	0	0	0	0	0	0	0	0	0	0	0	0	0	0	0	0	0
CASSTGQFGNTIYF	0.00010173	1	0	0	0	0	0	0		0	0	0	0	0	0	0	0	0	0	0	0	0	0	0	0	0	0	0	0	0	0	0	0	0	0	0	0	0	0	0	0	0	0	0	0	0	0	0	0
CASSSYSEQFF	0.00010173	1	0	0	0	0	0	0		0	0	0	0	0	0	0	0	0	0	0	0	0	0	0	0	0	0	0	0	0	0	0	0	0	0	0	0	0	0	0	0	0	0	0	0	0	0	0	0
CASSSVTYQPQHF	0.00010173	1	0	0	0	0	0	0		0	0	0	0	0	0	0	0	0	0	0	0	0	0	0	0	0	0	0	0	0	0	0	0	0	0	0	0	0	0	0	0	0	0	0	0	0	0	0	0
CASSSSLTPNTEAFF	0.00010173	1	0	0	0	0	0	0		0	0	0	0	0	0	0	0	0	0	0	0	0	0	0	0	0	0	0	0	0	0	0	0	0	0	0	0	0	0	0	0	0	0	0	0	0	0	0	0
CASSSRTGAKGWNGYTF	0.00010173	1	0	0	0	0	0	0		0	0	0	0	0	0	0	0	0	0	0	0	0	0	0	0	0	0	0	0	0	0	0	0	0	0	0	0	0	0	0	0	0	0	0	0	0	0	0	0
CASSSRRRARETQYF	0.00010173	1	0	0	0	0	0	0		0	0	0	0	0	0	0	0	0	0	0	0	0	0	0	0	0	0	0	0	0	0	0	0	0	0	0	0	0	0	0	0	0	0	0	0	0	0	0	0
CASSSRAGYSSYEQYF	0.00010173	1	0	0	0	0	0	0		0	0	0	0	0	0	0	0	0	0	0	0	0	0	0	0	0	0	0	0	0	0	0	0	0	0	0	0	0	0	0	0	0	0	0	0	0	0	0	0
CASSSPRGSKHNEQFF	0.00010173	1	0	0	0	0	0	0		0	0	0	0	0	0	0	0	0	0	0	0	0	0	0	0	0	0	0	0	0	0	0	0	0	0	0	0	0	0	0	0	0	0	0	0	0	0	0	0
CASSSGTILAKNIQYF	0.00010173	1	0	0	0	0	0	0		0	0	0	0	0	0	0	0	0	0	0	0	0	0	0	0	0	0	0	0	0	0	0	0	0	0	0	0	0	0	0	0	0	0	0	0	0	0	0	0
CASSSGRERIYYTGELFF	0.00010173	1	0	0	0	0	0	0		0	0	0	0	0	0	0	0	0	0	0	0	0	0	0	0	0	0	0	0	0	0	0	0	0	0	0	0	0	0	0	0	0	0	0	0	0	0	0	0
CASSSGQGVYQPQHF	0.00010173	1	0	0	0	0	0	0		0	0	0	0	0	0	0	0	0	0	0	0	0	0	0	0	0	0	0	0	0	0	0	0	0	0	0	0	0	0	0	0	0	0	0	0	0	0	0	0
CASSSGQGTFQETQYF	0.00010173	1	0	0	0	0	0	0		0	0	0	0	0	0	0	0	0	0	0	0	0	0	0	0	0	0	0	0	0	0	0	0	0	0	0	0	0	0	0	0	0	0	0	0	0	0	0	0
CASSSGQASYNEQFF	0.00010173	1	0	0	0	0	0	0		0	0	0	0	0	0	0	0	0	0	0	0	0	0	0	0	0	0	0	0	0	0	0	0	0	0	0	0	0	0	0	0	0	0	0	0	0	0	0	0
CASSSGPARQRNEQFF	0.00010173	1	0	0	0	0	0	0		0	0	0	0	0	0	0	0	0	0	0	0	0	0	0	0	0	0	0	0	0	0	0	0	0	0	0	0	0	0	0	0	0	0	0	0	0	0	0	0
CASSSGGEGIGNQPQHF	0.00010173	1	0	0	0	0	0	0		0	0	0	0	0	0	0	0	0	0	0	0	0	0	0	0	0	0	0	0	0	0	0	0	0	0	0	0	0	0	0	0	0	0	0	0	0	0	0	0
CASSSGDTHTLAKNIQYF	0.00010173	1	0	0	0	0	0	0		0	0	0	0	0	0	0	0	0	0	0	0	0	0	0	0	0	0	0	0	0	0	0	0	0	0	0	0	0	0	0	0	0	0	0	0	0	0	0	0
CASSSEGVSSNQPQHF	0.00010173	1	0	0	0	0	0	0		0	0	0	0	0	0	0	0	0	0	0	0	0	0	0	0	0	0	0	0	0	0	0	0	0	0	0	0	0	0	0	0	0	0	0	0	0	0	0	0
CASSSDRDGTDTQYF	0.00010173	1	0	0	0	0	0	0		0	0	0	0	0	0	0	0	0	0	0	0	0	0	0	0	0	0	0	0	0	0	0	0	0	0	0	0	0	0	0	0	0	0	0	0	0	0	0	0
CASSRERRTEAFF	0.00010173	1	0	0	0	0	0	0		0	0	0	0	0	0	0	0	0	0	0	0	0	0	0	0	0	0	0	0	0	0	0	0	0	0	0	0	0	0	0	0	0	0	0	0	0	0	0	0
CASSRDRENIQYF	0.00010173	1	0	0	0	0	0	0		0	0	0	0	0	0	0	0	0	0	0	0	0	0	0	0	0	0	0	0	0	0	0	0	0	0	0	0	0	0	0	0	0	0	0	0	0	0	0	0
CASSRAGGPPHEQYF	0.00010173	1	0	0	0	0	0	0		0	0	0	0	0	0	0	0	0	0	0	0	0	0	0	0	0	0	0	0	0	0	0	0	0	0	0	0	0	0	0	0	0	0	0	0	0	0	0	0
CASSRAANYGYTF	0.00010173	1	0	0	0	0	0	0		0	0	0	0	0	0	0	0	0	0	0	0	0	0	0	0	0	0	0	0	0	0	0	0	0	0	0	0	0	0	0	0	0	0	0	0	0	0	0	0
CASSQVAGGRFF	0.00010173	1	0	0	0	0	0	0		0	0	0	0	0	0	0	0	0	0	0	0	0	0	0	0	0	0	0	0	0	0	0	0	0	0	0	0	0	0	0	0	0	0	0	0	0	0	0	0
CASSQTGGTDTQYF	0.00010173	1	0	0	0	0	0	0		0	0	0	0	0	0	0	0	0	0	0	0	0	0	0	0	0	0	0	0	0	0	0	0	0	0	0	0	0	0	0	0	0	0	0	0	0	0	0	0
CASSQRESYETQYF	0.00010173	1	0	0	0	0	0	0		0	0	0	0	0	0	0	0	0	0	0	0	0	0	0	0	0	0	0	0	0	0	0	0	0	0	0	0	0	0	0	0	0	0	0	0	0	0	0	0
CASSQGVQERATDTQYF	0.00010173	1	0	0	0	0	0	0		0	0	0	0	0	0	0	0	0	0	0	0	0	0	0	0	0	0	0	0	0	0	0	0	0	0	0	0	0	0	0	0	0	0	0	0	0	0	0	0
CASSQGRGRHTGELFF	0.00010173	1	0	0	0	0	0	0		0	0	0	0	0	0	0	0	0	0	0	0	0	0	0	0	0	0	0	0	0	0	0	0	0	0	0	0	0	0	0	0	0	0	0	0	0	0	0	0
CASSQGGGGVHEQYF	0.00010173	1	0	0	0	0	0	0		0	0	0	0	0	0	0	0	0	0	0	0	0	0	0	0	0	0	0	0	0	0	0	0	0	0	0	0	0	0	0	0	0	0	0	0	0	0	0	0
CASSQDWTGGSNYGYTF	0.00010173	1	0	0	0	0	0	0		0	0	0	0	0	0	0	0	0	0	0	0	0	0	0	0	0	0	0	0	0	0	0	0	0	0	0	0	0	0	0	0	0	0	0	0	0	0	0	0
CASSQDSEYNSPLHF	0.00010173	1	0	0	0	0	0	0		0	0	0	0	0	0	0	0	0	0	0	0	0	0	0	0	0	0	0	0	0	0	0	0	0	0	0	0	0	0	0	0	0	0	0	0	0	0	0	0
CASSQDRGYDEQYF	0.00010173	1	0	0	0	0	0	0		0	0	0	0	0	0	0	0	0	0	0	0	0	0	0	0	0	0	0	0	0	0	0	0	0	0	0	0	0	0	0	0	0	0	0	0	0	0	0	0
CASSQDQGSNNEQFF	0.00010173	1	0	0	0	0	0	0		0	0	0	0	0	0	0	0	0	0	0	0	0	0	0	0	0	0	0	0	0	0	0	0	0	0	0	0	0	0	0	0	0	0	0	0	0	0	0	0
CASSQDLSQETQYF	0.00010173	1	0	0	0	0	0	0		0	0	0	0	0	0	0	0	0	0	0	0	0	0	0	0	0	0	0	0	0	0	0	0	0	0	0	0	0	0	0	0	0	0	0	0	0	0	0	0
CASSQDIITRETQYF	0.00010173	1	0	0	0	0	0	0		0	0	0	0	0	0	0	0	0	0	0	0	0	0	0	0	0	0	0	0	0	0	0	0	0	0	0	0	0	0	0	0	0	0	0	0	0	0	0	0
CASSQDGQGKGGLETQYF	0.00010173	1	0	0	0	0	0	0		0	0	0	0	0	0	0	0	0	0	0	0	0	0	0	0	0	0	0	0	0	0	0	0	0	0	0	0	0	0	0	0	0	0	0	0	0	0	0	0
CASSQAPTPSSYNEQFF	0.00010173	1	0	0	0	0	0	0		0	0	0	0	0	0	0	0	0	0	0	0	0	0	0	0	0	0	0	0	0	0	0	0	0	0	0	0	0	0	0	0	0	0	0	0	0	0	0	0
CASSQALGGDSYGYTF	0.00010173	1	0	0	0	0	0	0		0	0	0	0	0	0	0	0	0	0	0	0	0	0	0	0	0	0	0	0	0	0	0	0	0	0	0	0	0	0	0	0	0	0	0	0	0	0	0	0
CASSQADRGGEAFF	0.00010173	1	0	0	0	0	0	0		0	0	0	0	0	0	0	0	0	0	0	0	0	0	0	0	0	0	0	0	0	0	0	0	0	0	0	0	0	0	0	0	0	0	0	0	0	0	0	0
CASSPVEGALGYTF	0.00010173	1	0	0	0	0	0	0		0	0	0	0	0	0	0	0	0	0	0	0	0	0	0	0	0	0	0	0	0	0	0	0	0	0	0	0	0	0	0	0	0	0	0	0	0	0	0	0
CASSPSRGPTSEQYF	0.00010173	1	0	0	0	0	0	0		0	0	0	0	0	0	0	0	0	0	0	0	0	0	0	0	0	0	0	0	0	0	0	0	0	0	0	0	0	0	0	0	0	0	0	0	0	0	0	0
CASSPSLTGPNYGYTF	0.00010173	1	0	0	0	0	0	0		0	0	0	0	0	0	0	0	0	0	0	0	0	0	0	0	0	0	0	0	0	0	0	0	0	0	0	0	0	0	0	0	0	0	0	0	0	0	0	0
CASSPSKTGKTNYGYTF	0.00010173	1	0	0	0	0	0	0		0	0	0	0	0	0	0	0	0	0	0	0	0	0	0	0	0	0	0	0	0	0	0	0	0	0	0	0	0	0	0	0	0	0	0	0	0	0	0	0
CASSPSGLRSHEQFF	0.00010173	1	0	0	0	0	0	0		0	0	0	0	0	0	0	0	0	0	0	0	0	0	0	0	0	0	0	0	0	0	0	0	0	0	0	0	0	0	0	0	0	0	0	0	0	0	0	0
CASSPRQGGNTEAFF	0.00010173	1	0	0	0	0	0	0		0	0	0	0	0	0	0	0	0	0	0	0	0	0	0	0	0	0	0	0	0	0	0	0	0	0	0	0	0	0	0	0	0	0	0	0	0	0	0	0
CASSPRQGDTGELFF	0.00010173	1	0	0	0	0	1.22826e-05	0		0	0	0	0	0	0	0	0	0	0	0	0	0	0	0	0	0	0	0	0	0	0	0	0	0	0	0	0	0	0	0	0	0	0	0	0	0	0	0	0
CASSPRGSTPYNEQFF	0.00010173	1	0	0	0	0	0	0		0	0	0	0	0	0	0	0	0	0	0	0	0	0	0	0	0	0	0	0	0	0	0	0	0	0	0	0	0	0	0	0	0	0	0	0	0	0	0	0
CASSPRGLAGGDTQYF	0.00010173	1	0	0	0	0	0	0		0	0	0	0	0	0	0	0	0	0	0	0	0	0	0	0	0	0	0	0	0	0	0	0	0	0	0	0	0	0	0	0	0	0	0	0	0	0	0	0
CASSPRGGRYQETQYF	0.00010173	1	0	0	0	0	0	0		0	0	0	0	0	0	0	0	0	0	0	0	0	0	0	0	0	0	0	0	0	0	0	0	0	0	0	0	0	0	0	0	0	0	0	0	0	0	0	0
CASSPPVRVTGELFF	0.00010173	1	0	0	0	0	0	0		0	0	0	0	0	0	0	0	0	0	0	0	0	0	0	0	0	0	0	0	0	0	0	0	0	0	0	0	0	0	0	0	0	0	0	0	0	0	0	0
CASSPPRVPRGLENSPLHF	0.00010173	1	0	0	0	0	0	0		0	0	0	0	0	0	0	0	0	0	0	0	0	0	0	0	0	0	0	0	0	0	0	0	0	0	0	0	0	0	0	0	0	0	0	0	0	0	0	0
CASSPPRETTDTQYF	0.00010173	1	0	0	0	0	0	0		0	0	0	0	0	0	0	0	0	0	0	0	0	0	0	0	0	0	0	0	0	0	0	0	0	0	0	0	0	0	0	0	0	0	0	0	0	0	0	0
CASSPPPGQGSDEQFF	0.00010173	1	0	0	0	0	0	0		0	0	0	0	0	0	0	0	0	0	0	0	0	0	0	0	0	0	0	0	0	0	0	0	0	0	0	0	0	0	0	0	0	0	0	0	0	0	0	0
CASSPPLRGGNTEAFF	0.00010173	1	0	0	0	0	0	0		0	0	0	0	0	0	0	0	0	0	0	0	0	0	0	0	0	0	0	0	0	0	0	0	0	0	0	0	0	0	0	0	0	0	0	0	0	0	0	0
CASSPPEGYVKNIQYF	0.00010173	1	0	0	0	0	0	0		0	0	0	0	0	0	0	0	0	0	0	0	0	0	0	0	0	0	0	0	0	0	0	0	0	0	0	0	0	0	0	0	0	0	0	0	0	0	0	0
CASSPPDKTQNTIYF	0.00010173	1	0	0	0	0	0	0		0	0	0	0	0	0	0	0	0	0	0	0	0	0	0	0	0	0	0	0	0	0	0	0	0	0	0	0	0	0	0	0	0	0	0	0	0	0	0	0
CASSPPASKNIQYF	0.00010173	1	0	0	0	0	0	0		0	0	0	0	0	0	0	0	0	0	0	0	0	0	0	0	0	0	0	0	0	0	0	0	0	0	0	0	0	0	0	0	0	0	0	0	0	0	0	0
CASSPPAGSRNEQFF	0.00010173	1	0	0	0	0	0	0		0	0	0	0	0	0	0	0	0	0	0	0	0	0	0	0	0	0	0	0	0	0	0	0	0	0	0	0	0	0	0	0	0	0	0	0	0	0	0	0
CASSPLRSGEETQYF	0.00010173	1	0	0	0	0	0	0		0	0	0	0	0	0	0	0	0	0	0	0	0	0	0	0	0	0	0	0	0	0	0	0	0	0	0	0	0	0	0	0	0	0	0	0	0	0	0	0
CASSPLRGSYSNQPQHF	0.00010173	1	0	0	0	0	0	0		0	0	0	0	0	0	0	0	0	0	0	0	0	0	0	0	0	0	0	0	0	0	0	0	0	0	0	0	0	0	0	0	0	0	0	0	0	0	0	0
CASSPITKGQATIF	0.00010173	1	0	0	0	0	0	0		0	0	0	0	0	0	0	0	0	0	0	0	0	0	0	0	0	0	0	0	0	0	0	0	0	0	0	0	0	0	0	0	0	0	0	0	0	0	0	0
CASSPIQGRNTEAFF	0.00010173	1	0	0	0	0	0	0		0	0	0	0	0	0	0	0	0	0	0	0	0	0	0	0	0	0	0	0	0	0	0	0	0	0	0	0	0	0	0	0	0	0	0	0	0	0	0	0
CASSPGTGGWDEQYF	0.00010173	1	0	0	0	0	0	0		0	0	0	0	0	0	0	0	0	0	0	0	0	0	0	0	0	0	0	0	0	0	0	0	0	0	0	0	0	0	0	0	0	0	0	0	0	0	0	0
CASSPGRQAIYGYTF	0.00010173	1	0	0	0	0	0	0		0	0	0	0	0	0	0	0	0	0	0	0	0	0	0	0	0	0	0	0	0	0	0	0	0	0	0	0	0	0	0	0	0	0	0	0	0	0	0	0
CASSPGQVHAPYEQYF	0.00010173	1	0	0	0	0	0	0		0	0	0	0	0	0	0	0	0	0	0	0	0	0	0	0	0	0	0	0	0	0	0	0	0	0	0	0	0	0	0	0	0	0	0	0	0	0	0	0
CASSPGLAGGPGTDTQYF	0.00010173	1	0	0	0	0	0	0		0	0	0	0	0	0	0	0	0	0	0	0	0	0	0	0	0	0	0	0	0	0	0	0	0	0	0	0	0	0	0	0	0	0	0	0	0	0	0	0
CASSPFQGNYGYTF	0.00010173	1	0	0	0	0	0	0		0	0	0	0	0	0	0	0	0	0	0	0	0	0	0	0	0	0	0	0	0	0	0	0	0	0	0	0	0	0	0	0	0	0	0	0	0	0	0	0
CASSPEGQGAIEKLFF	0.00010173	1	0	0	0	0	0	0		0	0	0	0	0	0	0	0	0	0	0	0	0	0	0	0	0	0	0	0	0	0	0	0	0	0	0	0	0	0	0	0	0	0	0	0	0	0	0	0
CASSPEESSYNSPLHF	0.00010173	1	0	0	0	0	0	0		0	0	0	0	0	0	0	0	0	0	0	0	0	0	0	0	0	0	0	0	0	0	0	0	0	0	0	0	0	0	0	0	0	0	0	0	0	0	0	0
CASSPEAGTAYEQYF	0.00010173	1	0	0	0	0	0	0		0	0	0	0	0	0	0	0	0	0	0	0	0	0	0	0	0	0	0	0	0	0	0	0	0	0	0	0	0	0	0	0	0	0	0	0	0	0	0	0
CASSPALRRKAFF	0.00010173	1	0	0	0	0	0	0		0	0	0	0	0	0	0	0	0	0	0	0	0	0	0	0	0	0	0	0	0	0	0	0	0	0	0	0	0	0	0	0	0	0	0	0	0	0	0	0
CASSPAGLGGNQPQHF	0.00010173	1	0	0	0	0	0	0		0	0	0	0	0	0	0	0	0	0	0	0	0	0	0	0	0	0	0	0	0	0	0	0	0	0	0	0	0	0	0	0	0	0	0	0	0	0	0	0
CASSNFGRINEKLFF	0.00010173	1	0	0	0	0	0	0		0	0	0	0	0	0	0	0	0	0	0	0	0	0	0	0	0	0	0	0	0	0	0	0	0	0	0	0	0	0	0	0	0	0	0	0	0	0	0	0
CASSMVLGQGYNEQFF	0.00010173	1	0	0	0	0	0	0		0	0	0	0	0	0	0	0	0	0	0	0	0	0	0	0	0	0	0	0	0	0	0	0	0	0	0	0	0	0	0	0	0	0	0	0	0	0	0	0
CASSMTSAEQYF	0.00010173	1	0	0	0	0	0	0		0	0	0	0	0	0	0	0	0	0	0	0	0	0	0	0	0	0	0	0	0	0	0	0	0	0	0	0	0	0	0	0	0	0	0	0	0	0	0	0
CASSMRKASGRYLRDEQYF	0.00010173	1	0	0	0	0	0	0		0	0	0	0	0	0	0	0	0	0	0	0	0	0	0	0	0	0	0	0	0	0	0	0	0	0	0	0	0	0	0	0	0	0	0	0	0	0	0	0
CASSMGFQETQYF	0.00010173	1	0	0	0	0	0	0		0	0	0	0	0	0	0	0	0	0	0	0	0	0	0	0	0	0	0	0	0	0	0	0	0	0	0	0	0	0	0	0	0	0	0	0	0	0	0	0
CASSLVGVRHSGNTIYF	0.00010173	1	0	0	0	0	0	0		0	0	0	0	0	0	0	0	0	0	0	0	0	0	0	0	0	0	0	0	0	0	0	0	0	0	0	0	0	0	0	0	0	0	0	0	0	0	0	0
CASSLVGREGANTGELFF	0.00010173	1	0	0	0	0	0	0		0	0	0	0	0	0	0	0	0	0	0	0	0	0	0	0	0	0	0	0	0	0	0	0	0	0	0	0	0	0	0	0	0	0	0	0	0	0	0	0
CASSLTPGSGNTIYF	0.00010173	1	0	0	0	0	0	0		0	0	0	0	0	0	0	0	0	0	0	0	0	0	0	0	0	0	0	0	0	0	0	0	0	0	0	0	0	0	0	0	0	0	0	0	0	0	0	0
CASSLTGLAATDTQYF	0.00010173	1	0	0	0	0	0	0		0	0	0	0	0	0	0	0	0	0	0	0	0	0	0	0	0	0	0	0	0	0	0	0	0	0	0	0	0	0	0	0	0	0	0	0	0	0	0	0
CASSLSQGGEAFF	0.00010173	1	0	0	0	0	0	0		0	0	0	0	0	0	0	0	0	0	0	0	0	0	0	0	0	0	0	0	0	0	0	0	0	0	0	0	0	0	0	0	0	0	0	0	0	0	0	0
CASSLSGVGRSFYEQYF	0.00010173	1	0	0	0	0	0	0		0	0	0	0	0	0	0	0	0	0	0	0	0	0	0	0	0	0	0	0	0	0	0	0	0	0	0	0	0	0	0	0	0	0	0	0	0	0	0	0
CASSLSGDSRTGYTF	0.00010173	1	0	0	0	0	0	0		0	0	0	0	0	0	0	0	0	0	0	0	0	0	0	0	0	0	0	0	0	0	0	0	0	0	0	0	0	0	0	0	0	0	0	0	0	0	0	0
CASSLRTSGRGGETQYF	0.00010173	1	0	0	0	0	0	0		0	0	0	0	0	0	0	0	0	0	0	0	0	0	0	0	0	0	0	0	0	0	0	0	0	0	0	0	0	0	0	0	0	0	0	0	0	0	0	0
CASSLRTSGGITDTQYF	0.00010173	1	0	0	0	0	0	0		0	0	0	0	0	0	0	0	0	0	0	0	0	0	0	0	0	0	0	0	0	0	0	0	0	0	0	0	0	0	0	0	0	0	0	0	0	0	0	0
CASSLRGGYQPQHF	0.00010173	1	0	0	0	0	0	0		0	0	0	0	0	0	0	0	0	0	0	0	0	0	0	0	0	0	0	0	0	0	0	0	0	0	0	0	0	0	0	0	0	0	0	0	0	0	0	0
CASSLRASGNSPGAQYF	0.00010173	1	0	0	0	0	0	0		0	0	0	0	0	0	0	0	0	0	0	0	0	0	0	0	0	0	0	0	0	0	0	0	0	0	0	0	0	0	0	0	0	0	0	0	0	0	0	0
CASSLRALGYNEQFF	0.00010173	1	0	0	0	0	0	0		0	0	0	0	0	0	0	0	0	0	0	0	0	0	0	0	0	0	0	0	0	0	0	0	0	0	0	0	0	0	0	0	0	0	0	0	0	0	0	0
CASSLRAGLAGLVRNTGELFF	0.00010173	1	0	0	0	0	0	0		0	0	0	0	0	0	0	0	0	0	0	0	0	0	0	0	0	0	0	0	0	0	0	0	0	0	0	0	0	0	0	0	0	0	0	0	0	0	0	0
CASSLPQFGEAFF	0.00010173	1	0	0	0	0	0	0		0	0	0	0	0	0	0	0	0	0	0	0	0	0	0	0	0	0	0	0	0	0	0	0	0	0	0	0	0	0	0	0	0	0	0	0	0	0	0	0
CASSLNLNEQYF	0.00010173	1	0	0	0	0	0	0		0	0	0	0	0	0	0	0	0	0	0	0	0	0	0	0	0	0	0	0	0	0	0	0	0	0	0	0	0	0	0	0	0	0	0	0	0	0	0	0
CASSLLGQVNTEAFF	0.00010173	1	0	0	0	0	0	0		0	0	0	0	0	0	0	0	0	0	0	0	0	0	0	0	0	0	0	0	0	0	0	0	0	0	0	0	0	0	0	0	0	0	0	0	0	0	0	0
CASSLGWIRNIQYF	0.00010173	1	0	0	0	0	0	0		0	0	0	0	0	0	0	0	0	0	0	0	0	0	0	0	0	0	0	0	0	0	0	0	0	0	0	0	0	0	0	0	0	0	0	0	0	0	0	0
CASSLGVGTGYYF	0.00010173	1	0	0	0	0	0	0		0	0	0	0	0	0	0	0	0	0	0	0	0	0	0	0	0	0	0	0	0	0	0	0	0	0	0	0	0	0	0	0	0	0	0	0	0	0	0	0
CASSLGVAGGLTDTQYF	0.00010173	1	0	0	0	0	0	0		0	0	0	0	0	0	0	0	0	0	0	0	0	0	0	0	0	0	0	0	0	0	0	0	0	0	0	0	0	0	0	0	0	0	0	0	0	0	0	0
CASSLGRRQFQETQYF	0.00010173	1	0	0	0	0	0	0		0	0	0	0	0	0	0	0	0	0	0	0	0	0	0	0	0	0	0	0	0	0	0	0	0	0	0	0	0	0	0	0	0	0	0	0	0	0	0	0
CASSLGQTSIHGYTF	0.00010173	1	0	0	0	0	0	0		0	0	0	0	0	0	0	0	0	0	0	0	0	0	0	0	0	0	0	0	0	0	0	0	0	0	0	0	0	0	0	0	0	0	0	0	0	0	0	0
CASSLGLSHNEQFF	0.00010173	1	0	0	0	0	0	0		0	0	0	0	0	0	0	0	0	0	0	0	0	0	0	0	0	0	0	0	0	0	0	0	0	0	0	0	0	0	0	0	0	0	0	0	0	0	0	0
CASSLGLGGGLETQYF	0.00010173	1	0	0	0	0	0	0		0	0	0	0	0	0	0	0	0	0	0	0	0	0	0	0	0	0	0	0	0	0	0	0	0	0	0	0	0	0	0	0	0	0	0	0	0	0	0	0
CASSLGGQGSDYGYTF	0.00010173	1	0	0	0	0	0	0		0	0	0	0	0	0	0	0	0	0	0	0	0	0	0	0	0	0	0	0	0	0	0	0	0	0	0	0	0	0	0	0	0	0	0	0	0	0	0	0
CASSLGGFGTGITDTQYF	0.00010173	1	0	0	0	0	0	0		0	0	0	0	0	0	0	0	0	0	0	0	0	0	0	0	0	0	0	0	0	0	0	0	0	0	0	0	0	0	0	0	0	0	0	0	0	0	0	0
CASSLGGAETGELFF	0.00010173	1	0	0	0	0	0	0		0	0	0	0	0	0	0	0	0	0	0	0	0	0	0	0	0	0	0	0	0	0	0	0	0	0	0	0	0	0	0	0	0	0	0	0	0	0	0	0
CASSLFPTSPYNEQFF	0.00010173	1	0	0	0	0	0	0		0	0	0	0	0	0	0	0	0	0	0	0	0	0	0	0	0	0	0	0	0	0	0	0	0	0	0	0	0	0	0	0	0	0	0	0	0	0	0	0
CASSLESGTGGLGYTF	0.00010173	1	0	0	0	0	0	0		0	0	0	0	0	0	0	0	0	0	0	0	0	0	0	0	0	0	0	0	0	0	0	0	0	0	0	0	0	0	0	0	0	0	0	0	0	0	0	0
CASSLDRQARDTDTQYF	0.00010173	1	0	0	0	0	0	0		0	0	0	0	0	0	0	0	0	0	0	0	0	0	0	0	0	0	0	0	0	0	0	0	0	0	0	0	0	0	0	0	0	0	0	0	0	0	0	0
CASSLASLITEAFF	0.00010173	1	0	0	0	0	0	0		0	0	0	0	0	0	0	0	0	0	0	0	0	0	0	0	0	0	0	0	0	0	0	0	0	0	0	0	0	0	0	0	0	0	0	0	0	0	0	0
CASSLAQGELFF	0.00010173	1	0	0	0	0	0	0		0	0	0	0	0	0	0	0	0	0	0	0	0	0	0	0	0	0	0	0	0	0	0	0	0	0	0	0	0	0	0	0	0	0	0	0	0	0	0	0
CASSLAMSGVGTEAFF	0.00010173	1	0	0	0	0	0	0		0	0	0	0	0	0	0	0	0	0	0	0	0	0	0	0	0	0	0	0	0	0	0	0	0	0	0	0	0	0	0	0	0	0	0	0	0	0	0	0
CASSLALGGGPMNEQFF	0.00010173	1	0	0	0	0	0	0		0	0	0	0	0	0	0	0	0	0	0	0	0	0	0	0	0	0	0	0	0	0	0	0	0	0	0	0	0	0	0	0	0	0	0	0	0	0	0	0
CASSLALAGFAYEQYF	0.00010173	1	0	0	0	0	0	0		0	0	0	0	0	0	0	0	0	0	0	0	0	0	0	0	0	0	0	0	0	0	0	0	0	0	0	0	0	0	0	0	0	0	0	0	0	0	0	0
CASSLAGTSGGAKRTEQFF	0.00010173	1	0	0	0	0	0	0		0	0	0	0	0	0	0	0	0	0	0	0	0	0	0	0	0	0	0	0	0	0	0	0	0	0	0	0	0	0	0	0	0	0	0	0	0	0	0	0
CASSLAGGGGANVLTF	0.00010173	1	0	0	0	0	0	0		0	0	0	0	0	0	0	0	0	0	0	0	0	0	0	0	0	0	0	0	0	0	0	0	0	0	0	0	0	0	0	0	0	0	0	0	0	0	0	0
CASSLAFVSYNEQFF	0.00010173	1	0	0	0	0	0	0		0	0	0	0	0	0	0	0	0	0	0	0	0	0	0	0	0	0	0	0	0	0	0	0	0	0	0	0	0	0	0	0	0	0	0	0	0	0	0	0
CASSKLASEYYEQYF	0.00010173	1	0	0	0	0	0	0		0	0	0	0	0	0	0	0	0	0	0	0	0	0	0	0	0	0	0	0	0	0	0	0	0	0	0	0	0	0	0	0	0	0	0	0	0	0	0	0
CASSKEGLFTGTDQETQYF	0.00010173	1	0	0	0	0	0	0		0	0	0	0	0	0	0	0	0	0	0	0	0	0	0	0	0	0	0	0	0	0	0	0	0	0	0	0	0	0	0	0	0	0	0	0	0	0	0	0
CASSISTQNIQYF	0.00010173	1	0	0	0	0	0	0		0	0	0	0	0	0	0	0	0	0	0	0	0	0	0	0	0	0	0	0	0	0	0	0	0	0	0	0	0	0	0	0	0	0	0	0	0	0	0	0
CASSISPGGPYEQYF	0.00010173	1	0	0	0	0	0	5.6212e-06		0	0	0	0	0	0	0	0	0	0	0	0	0	0	0	0	0	0	0	0	0	0	0	0	0	0	0	0	0	0	0	0	0	0	0	0	0	0	0	0
CASSIIGDRAYNEQFF	0.00010173	1	0	0	0	0	0	0		0	0	0	0	0	0	0	0	0	0	0	0	0	0	0	0	0	0	0	0	0	0	0	0	0	0	0	0	0	0	0	0	0	0	0	0	0	0	0	0
CASSIELYEQYF	0.00010173	1	0	0	0	0	0	0		0	0	0	0	0	0	0	0	0	0	0	0	0	0	0	0	0	0	0	0	0	0	0	0	0	0	0	0	0	0	0	0	0	0	0	0	0	0	0	0
CASSHSSGPPGELFF	0.00010173	1	0	0	0	0	0	0		0	0	0	0	0	0	0	0	0	0	0	0	0	0	0	0	0	0	0	0	0	0	0	0	0	0	0	0	0	0	0	0	0	0	0	0	0	0	0	0
CASSHQTADSGNTIYF	0.00010173	1	0	0	0	0	0	0		0	0	0	0	0	0	0	0	0	0	0	0	0	0	0	0	0	0	0	0	0	0	0	0	0	0	0	0	0	0	0	0	0	0	0	0	0	0	0	0
CASSHPDTDTQYF	0.00010173	1	0	0	0	0	0	0		0	0	0	0	0	0	0	0	0	0	0	0	0	0	0	0	0	0	0	0	0	0	0	0	0	0	0	0	0	0	0	0	0	0	0	0	0	0	0	0
CASSHADEKLFF	0.00010173	1	0	0	0	0	0	0		0	0	0	0	0	0	0	0	0	0	0	0	0	0	0	0	0	0	0	0	0	0	0	0	0	0	0	0	0	0	0	0	0	0	0	0	0	0	0	0
CASSGSRAVSYNEQFF	0.00010173	1	0	0	0	0	0	0		0	0	0	0	0	0	0	0	0	0	0	0	0	0	0	0	0	0	0	0	0	0	0	0	0	0	0	0	0	0	0	0	0	0	0	0	0	0	0	0
CASSGRRGDSHSTGELFF	0.00010173	1	0	0	0	0	0	0		0	0	0	0	0	0	0	0	0	0	0	0	0	0	0	0	0	0	0	0	0	0	0	0	0	0	0	0	0	0	0	0	0	0	0	0	0	0	0	0
CASSGQGRLSNQPQHF	0.00010173	1	0	0	0	0	0	0		0	0	0	0	0	0	0	0	0	0	0	0	0	0	0	0	0	0	0	0	0	0	0	0	0	0	0	0	0	0	0	0	0	0	0	0	0	0	0	0
CASSGGAGGPLSTDTQYF	0.00010173	1	0	0	0	0	0	0		0	0	0	0	0	0	0	0	0	0	0	0	0	0	0	0	0	0	0	0	0	0	0	0	0	0	0	0	0	0	0	0	0	0	0	0	0	0	0	0
CASSGDIQYDQPQHF	0.00010173	1	0	0	0	0	0	0		0	0	0	0	0	0	0	0	0	0	0	0	0	0	0	0	0	0	0	0	0	0	0	0	0	0	0	0	0	0	0	0	0	0	0	0	0	0	0	0
CASSFYSRLQYNEQFF	0.00010173	1	0	0	0	0	0	0		0	0	0	0	0	0	0	0	0	0	0	0	0	0	0	0	0	0	0	0	0	0	0	0	0	0	0	0	0	0	0	0	0	0	0	0	0	0	0	0
CASSFTTGPSTEAFF	0.00010173	1	0	0	0	0	0	0		0	0	0	0	0	0	0	0	0	0	0	0	0	0	0	0	0	0	0	0	0	0	0	0	0	0	0	0	0	0	0	0	0	0	0	0	0	0	0	0
CASSFSDQTTEAFF	0.00010173	1	0	0	0	0	0	0		0	0	0	0	0	0	0	0	0	0	0	0	0	0	0	0	0	0	0	0	0	0	0	0	0	0	0	0	0	0	0	0	0	0	0	0	0	0	0	0
CASSFRGGQRPYNEQFF	0.00010173	1	0	0	0	0	0	0		0	0	0	0	0	0	0	0	0	0	0	0	0	0	0	0	0	0	0	0	0	0	0	0	0	0	0	0	0	0	0	0	0	0	0	0	0	0	0	0
CASSFQTDTEQFF	0.00010173	1	0	0	0	0	0	0		0	0	0	0	0	0	0	0	0	0	0	0	0	0	0	0	0	0	0	0	0	0	0	0	0	0	0	0	0	0	0	0	0	0	0	0	0	0	0	0
CASSFQRGQHSTDTQYF	0.00010173	1	0	0	0	0	0	0		0	0	0	0	0	0	0	0	0	0	0	0	0	0	0	0	0	0	0	0	0	0	0	0	0	0	0	0	0	0	0	0	0	0	0	0	0	0	0	0
CASSFQKWEETQYF	0.00010173	1	0	0	0	0	0	0		0	0	0	0	0	0	0	0	0	0	0	0	0	0	0	0	0	0	0	0	0	0	0	0	0	0	0	0	0	0	0	0	0	0	0	0	0	0	0	0
CASSFLPGGETQYF	0.00010173	1	0	0	0	0	0	0		0	0	0	0	0	0	0	0	0	0	0	0	0	0	0	0	0	0	0	0	0	0	0	0	0	0	0	0	0	0	0	0	0	0	0	0	0	0	0	0
CASSFLGAAAGELFF	0.00010173	1	0	0	0	0	0	0		0	0	0	0	0	0	0	0	0	0	0	0	0	0	0	0	0	0	0	0	0	0	0	0	0	0	0	0	0	0	0	0	0	0	0	0	0	0	0	0
CASSFHHHSGTGTYEQYF	0.00010173	1	0	0	0	0	0	0		0	0	0	0	0	0	0	0	0	0	0	0	0	0	0	0	0	0	0	0	0	0	0	0	0	0	0	0	0	0	0	0	0	0	0	0	0	0	0	0
CASSFDFGTSGRAFWTGELFF	0.00010173	1	0	0	0	0	0	0		0	0	0	0	0	0	0	0	0	0	0	0	0	0	0	0	0	0	0	0	0	0	0	0	0	0	0	0	0	0	0	0	0	0	0	0	0	0	0	0
CASSFAGTGAEKLFF	0.00010173	1	0	0	0	0	0	0		0	0	0	0	0	0	0	0	0	0	0	0	0	0	0	0	0	0	0	0	0	0	0	0	0	0	0	0	0	0	0	0	0	0	0	0	0	0	0	0
CASSEYYGSLYGSEISGNTIYF	0.00010173	1	0	0	0	0	0	0		0	0	0	0	0	0	0	0	0	0	0	0	0	0	0	0	0	0	0	0	0	0	0	0	0	0	0	0	0	0	0	0	0	0	0	0	0	0	0	0
CASSEVPMASYNEQFF	0.00010173	1	0	0	0	0	0	0		0	0	0	0	0	0	0	0	0	0	0	0	0	0	0	0	0	0	0	0	0	0	0	0	0	0	0	0	0	0	0	0	0	0	0	0	0	0	0	0
CASSEVGTGISGNTIYF	0.00010173	1	0	0	0	0	0	0		0	0	0	0	0	0	0	0	0	0	0	0	0	0	0	0	0	0	0	0	0	0	0	0	0	0	0	0	0	0	0	0	0	0	0	0	0	0	0	0
CASSETSGGATELFF	0.00010173	1	0	0	0	0	0	0		0	0	0	0	0	0	0	0	0	0	0	0	0	0	0	0	0	0	0	0	0	0	0	0	0	0	0	0	0	0	0	0	0	0	0	0	0	0	0	0
CASSEPRTSQETQYF	0.00010173	1	0	0	0	0	0	0		0	0	0	0	0	0	0	0	0	0	0	0	0	0	0	0	0	0	0	0	0	0	0	0	0	0	0	0	0	0	0	0	0	0	0	0	0	0	0	0
CASSEDRYQETQYF	0.00010173	1	0	0	0	0	0	0		0	0	0	0	0	0	0	0	0	0	0	0	0	0	0	0	0	0	0	0	0	0	0	0	0	0	0	0	0	0	0	0	0	0	0	0	0	0	0	0
CASSDFYEGQFAYEQYF	0.00010173	1	0	0	0	0	0	0		0	0	0	0	0	0	0	0	0	0	0	0	0	0	0	0	0	0	0	0	0	0	0	0	0	0	0	0	0	0	0	0	0	0	0	0	0	0	0	0
CASSATTGAREKLFF	0.00010173	1	0	0	0	0	0	0		0	0	0	0	0	0	0	0	0	0	0	0	0	0	0	0	0	0	0	0	0	0	0	0	0	0	0	0	0	0	0	0	0	0	0	0	0	0	0	0
CASSATSGNYNEQFF	0.00010173	1	0	0	0	0	0	0		0	0	0	0	0	0	0	0	0	0	0	0	0	0	0	0	0	0	0	0	0	0	0	0	0	0	0	0	0	0	0	0	0	0	0	0	0	0	0	0
CASSATGTGGSYEQYF	0.00010173	1	0	0	0	0	0	0		0	0	0	0	0	0	0	0	0	0	0	0	0	0	0	0	0	0	0	0	0	0	0	0	0	0	0	0	0	0	0	0	0	0	0	0	0	0	0	0
CASSASDKEKLFF	0.00010173	1	0	0	0	0	0	0		0	0	0	0	0	0	0	0	0	0	0	0	0	0	0	0	0	0	0	0	0	0	0	0	0	0	0	0	0	0	0	0	0	0	0	0	0	0	0	0
CASSAITPYEQYF	0.00010173	1	0	0	0	0	0	0		0	0	0	0	0	0	0	0	0	0	0	0	0	0	0	0	0	0	0	0	0	0	0	0	0	0	0	0	0	0	0	0	0	0	0	0	0	0	0	0
CASSADRAYYGYTF	0.00010173	1	0	0	0	0	0	0		0	0	0	0	0	0	0	0	0	0	0	0	0	0	0	0	0	0	0	0	0	0	0	0	0	0	0	0	0	0	0	0	0	0	0	0	0	0	0	0
CASRWTVSNQPQHF	0.00010173	1	0	0	0	0	0	0		0	0	0	0	0	0	0	0	0	0	0	0	0	0	0	0	0	0	0	0	0	0	0	0	0	0	0	0	0	0	0	0	0	0	0	0	0	0	0	0
CASRWDRRVAEAFF	0.00010173	1	0	0	0	0	0	0		0	0	0	0	0	0	0	0	0	0	0	0	0	0	0	0	0	0	0	0	0	0	0	0	0	0	0	0	0	0	0	0	0	0	0	0	0	0	0	0
CASRVSGFEAFF	0.00010173	1	0	0	0	0	0	0		0	0	0	0	0	0	0	0	0	0	0	0	0	0	0	0	0	0	0	0	0	0	0	0	0	0	0	0	0	0	0	0	0	0	0	0	0	0	0	0
CASRTSDSYEQYF	0.00010173	1	0	0	0	0	0	0		0	0	0	0	0	0	0	0	0	0	0	0	0	0	0	0	0	0	0	0	0	0	0	0	0	0	0	0	0	0	0	0	0	0	0	0	0	0	0	0
CASRTGVVPSETQYF	0.00010173	1	0	0	0	0	0	0		0	0	0	0	0	0	0	0	0	0	0	0	0	0	0	0	0	0	0	0	0	0	0	0	0	0	0	0	0	0	0	0	0	0	0	0	0	0	0	0
CASRTAGKDTQYF	0.00010173	1	0	0	0	0	0	0		0	0	0	0	0	0	0	0	0	0	0	0	0	0	0	0	0	0	0	0	0	0	0	0	0	0	0	0	0	0	0	0	0	0	0	0	0	0	0	0
CASRSTGIPEAFF	0.00010173	1	0	0	0	0	0	0		0	0	0	0	0	0	0	0	0	0	0	0	0	0	0	0	0	0	0	0	0	0	0	0	0	0	0	0	0	0	0	0	0	0	0	0	0	0	0	0
CASRRSTLDSNQPQHF	0.00010173	1	0	0	0	0	0	0		0	0	0	0	0	0	0	0	0	0	0	0	0	0	0	0	0	0	0	0	0	0	0	0	0	0	0	0	0	0	0	0	0	0	0	0	0	0	0	0
CASRRGLAYPEQFF	0.00010173	1	0	0	0	0	0	0		0	0	0	0	0	0	0	0	0	0	0	0	0	0	0	0	0	0	0	0	0	0	0	0	0	0	0	0	0	0	0	0	0	0	0	0	0	0	0	0
CASRRAGGSYNEQFF	0.00010173	1	0	0	0	0	0	0		0	0	0	0	0	0	0	0	0	0	0	0	0	0	0	0	0	0	0	0	0	0	0	0	0	0	0	0	0	0	0	0	0	0	0	0	0	0	0	0
CASRQDGDRDDGYTF	0.00010173	1	0	0	0	0	0	0		0	0	0	0	0	0	0	0	0	0	0	0	0	0	0	0	0	0	0	0	0	0	0	0	0	0	0	0	0	0	0	0	0	0	0	0	0	0	0	0
CASRPPSPLHF	0.00010173	1	0	0	0	0	0	0		0	0	0	0	0	0	0	0	0	0	0	0	0	0	0	0	0	0	0	0	0	0	0	0	0	0	0	0	0	0	0	0	0	0	0	0	0	0	0	0
CASRPFPGTSRTDTQYF	0.00010173	1	0	0	0	0	0	0		0	0	0	0	0	0	0	0	0	0	0	0	0	0	0	0	0	0	0	0	0	0	0	0	0	0	0	0	0	0	0	0	0	0	0	0	0	0	0	0
CASRPAGTDNEQFF	0.00010173	1	0	0	0	0	0	0		0	0	0	0	0	0	0	0	0	0	0	0	0	0	0	0	0	0	0	0	0	0	0	0	0	0	0	0	0	0	0	0	0	0	0	0	0	0	0	0
CASRNGRQGGETQYF	0.00010173	1	0	0	0	0	0	0		0	0	0	0	0	0	0	0	0	0	0	0	0	0	0	0	0	0	0	0	0	0	0	0	0	0	0	0	0	0	0	0	0	0	0	0	0	0	0	0
CASRLVTDTQYF	0.00010173	1	0	0	0	0	0	0		0	0	0	0	0	0	0	0	0	0	0	0	0	0	0	0	0	0	0	0	0	0	0	0	0	0	0	0	0	0	0	0	0	0	0	0	0	0	0	0
CASRLQDGRWNYGYTF	0.00010173	1	0	0	0	0	0	0		0	0	0	0	0	0	0	0	0	0	0	0	0	0	0	0	0	0	0	0	0	0	0	0	0	0	0	0	0	0	0	0	0	0	0	0	0	0	0	0
CASRLPRSGRMEAFF	0.00010173	1	0	0	0	0	0	0		0	0	0	0	0	0	0	0	0	0	0	0	0	0	0	0	0	0	0	0	0	0	0	0	0	0	0	0	0	0	0	0	0	0	0	0	0	0	0	0
CASRLGGGSQETQYF	0.00010173	1	0	0	0	0	0	0		0	0	0	0	0	0	0	0	0	0	0	0	0	0	0	0	0	0	0	0	0	0	0	0	0	0	0	0	0	0	0	0	0	0	0	0	0	0	0	0
CASRLGGAQEETQYF	0.00010173	1	0	0	0	0	0	0		0	0	0	0	0	0	0	0	0	0	0	0	0	0	0	0	0	0	0	0	0	0	0	0	0	0	0	0	0	0	0	0	0	0	0	0	0	0	0	0
CASRKNTATNEKLFF	0.00010173	1	0	0	0	0	0	0		0	0	0	0	0	0	0	0	0	0	0	0	0	0	0	0	0	0	0	0	0	0	0	0	0	0	0	0	0	0	0	0	0	0	0	0	0	0	0	0
CASRKGITMNTEAFF	0.00010173	1	0	0	0	0	0	0		0	0	0	0	0	0	0	0	0	0	0	0	0	0	0	0	0	0	0	0	0	0	0	0	0	0	0	0	0	0	0	0	0	0	0	0	0	0	0	0
CASRKDGTGSNYGYTF	0.00010173	1	0	0	0	0	0	0		0	0	0	0	0	0	0	0	0	0	0	0	0	0	0	0	0	0	0	0	0	0	0	0	0	0	0	0	0	0	0	0	0	0	0	0	0	0	0	0
CASRGVQETQYF	0.00010173	1	0	0	0	0	0	0		0	0	0	0	0	0	0	0	0	0	0	0	0	0	0	0	0	0	0	0	0	0	0	0	0	0	0	0	0	0	0	0	0	0	0	0	0	0	0	0
CASRGGGPYNSPLHF	0.00010173	1	0	0	0	0	0	0		0	0	0	0	0	0	0	0	0	0	0	0	0	0	0	0	0	0	0	0	0	0	0	0	0	0	0	0	0	0	0	0	0	0	0	0	0	0	0	0
CASRDRQMSSYEQYF	0.00010173	1	0	0	0	0	0	0		0	0	0	0	0	0	0	0	0	0	0	0	0	0	0	0	0	0	0	0	0	0	0	0	0	0	0	0	0	0	0	0	0	0	0	0	0	0	0	0
CASPRTGSNTGELFF	0.00010173	1	0	0	0	0	0	0		0	0	0	0	0	0	0	0	0	0	0	0	0	0	0	0	0	0	0	0	0	0	0	0	0	0	0	0	0	0	0	0	0	0	0	0	0	0	0	0
CASNLLAGGPQFF	0.00010173	1	0	0	0	0	0	0		0	0	0	0	0	0	0	0	0	0	0	0	0	0	0	0	0	0	0	0	0	0	0	0	0	0	0	0	0	0	0	0	0	0	0	0	0	0	0	0
CASNGDRGTEAFF	0.00010173	1	0	0	0	0	0	0		0	0	0	0	0	0	0	0	0	0	0	0	0	0	0	0	0	0	0	0	0	0	0	0	0	0	0	0	0	0	0	0	0	0	0	0	0	0	0	0
CASLALGLAGAHEQFF	0.00010173	1	0	0	0	0	0	0		0	0	0	0	0	0	0	0	0	0	0	0	0	0	0	0	0	0	0	0	0	0	0	0	0	0	0	0	0	0	0	0	0	0	0	0	0	0	0	0
CASKEGPAETQYF	0.00010173	1	0	0	0	0	0	0		0	0	0	0	0	0	0	0	0	0	0	0	0	0	0	0	0	0	0	0	0	0	0	0	0	0	0	0	0	0	0	0	0	0	0	0	0	0	0	0
CASKDGSYNEQFF	0.00010173	1	0	0	0	0	0	0		0	0	0	0	0	0	0	0	0	0	0	0	0	0	0	0	0	0	0	0	0	0	0	0	0	0	0	0	0	0	0	0	0	0	0	0	0	0	0	0
CASGRGTSEGEQYF	0.00010173	1	0	0	0	0	0	0		0	0	0	0	0	0	0	0	0	0	0	0	0	0	0	0	0	0	0	0	0	0	0	0	0	0	0	0	0	0	0	0	0	0	0	0	0	0	0	0
CASGKVGLAGLTDTQYF	0.00010173	1	0	0	0	0	0	0		0	0	0	0	0	0	0	0	0	0	0	0	0	0	0	0	0	0	0	0	0	0	0	0	0	0	0	0	0	0	0	0	0	0	0	0	0	0	0	0
CASGGRQEYQETQYF	0.00010173	1	0	0	0	0	0	0		0	0	0	0	0	0	0	0	0	0	0	0	0	0	0	0	0	0	0	0	0	0	0	0	0	0	0	0	0	0	0	0	0	0	0	0	0	0	0	0
CASGEGDNEQFF	0.00010173	1	0	0	0	0	0	0		0	0	0	0	0	0	0	0	0	0	0	0	0	0	0	0	0	0	0	0	0	0	0	0	0	0	0	0	0	0	0	0	0	0	0	0	0	0	0	0
CASASLPMDSYEQYF	0.00010173	1	0	0	0	0	0	0		0	0	0	0	0	0	0	0	0	0	0	0	0	0	0	0	0	0	0	0	0	0	0	0	0	0	0	0	0	0	0	0	0	0	0	0	0	0	0	0
CAQSPPGFDEQYF	0.00010173	1	0	0	0	0	0	0		0	0	0	0	0	0	0	0	0	0	0	0	0	0	0	0	0	0	0	0	0	0	0	0	0	0	0	0	0	0	0	0	0	0	0	0	0	0	0	0
CAISVAGGLQYEQYF	0.00010173	1	0	0	0	0	0	0		0	0	0	0	0	0	0	0	0	0	0	0	0	0	0	0	0	0	0	0	0	0	0	0	0	0	0	0	0	0	0	0	0	0	0	0	0	0	0	0
CAISESALAASGNTIYF	0.00010173	1	0	0	0	0	0	0		0	0	0	0	0	0	0	0	0	0	0	0	0	0	0	0	0	0	0	0	0	0	0	0	0	0	0	0	0	0	0	0	0	0	0	0	0	0	0	0
CAISEGGTGGYEQYF	0.00010173	1	0	0	0	0	0	0		0	0	0	0	0	0	0	0	0	0	0	0	0	0	0	0	0	0	0	0	0	0	0	0	0	0	0	0	0	0	0	0	0	0	0	0	0	0	0	0
CAISARGLGEGRWNTEAFF	0.00010173	1	0	0	0	0	0	0		0	0	0	0	0	0	0	0	0	0	0	0	0	0	0	0	0	0	0	0	0	0	0	0	0	0	0	0	0	0	0	0	0	0	0	0	0	0	0	0
CAISAESFYEQYF	0.00010173	1	0	0	0	0	0	0		0	0	0	0	0	0	0	0	0	0	0	0	0	0	0	0	0	0	0	0	0	0	0	0	0	0	0	0	0	0	0	0	0	0	0	0	0	0	0	0
CAIRGTGYEQYF	0.00010173	1	0	0	0	0	0	0		0	0	0	0	0	0	0	0	0	0	0	0	0	0	0	0	0	0	0	0	0	0	0	0	0	0	0	0	0	0	0	0	0	0	0	0	0	0	0	0
CAIRAEQETQYF	0.00010173	1	0	0	0	0	0	0		0	0	0	0	0	0	0	0	0	0	0	0	0	0	0	0	0	0	0	0	0	0	0	0	0	0	0	0	0	0	0	0	0	0	0	0	0	0	0	0
CAILTGVNEQFF	0.00010173	1	0	0	0	0	0	0		0	0	0	0	0	0	0	0	0	0	0	0	0	0	0	0	0	0	0	0	0	0	0	0	0	0	0	0	0	0	0	0	0	0	0	0	0	0	0	0
CAIGGSGGYTF	0.00010173	1	0	0	0	0	0	0		0	0	0	0	0	0	0	0	0	0	0	0	0	0	0	0	0	0	0	0	0	0	0	0	0	0	0	0	0	0	0	0	0	0	0	0	0	0	0	0
CAIAGLDNEQFF	0.00010173	1	0	0	0	0	0	0		0	0	0	0	0	0	0	0	0	0	0	0	0	0	0	0	0	0	0	0	0	0	0	0	0	0	0	0	0	0	0	0	0	0	0	0	0	0	0	0
CACTRTGGGAPYEQYF	0.00010173	1	0	0	0	0	0	0		0	0	0	0	0	0	0	0	0	0	0	0	0	0	0	0	0	0	0	0	0	0	0	0	0	0	0	0	0	0	0	0	0	0	0	0	0	0	0	0
CAADGQGRDEQYF	0.00010173	1	0	0	0	0	0	0		0	0	0	0	0	0	0	0	0	0	0	0	0	0	0	0	0	0	0	0	0	0	0	0	0	0	0	0	0	0	0	0	0	0	0	0	0	0	0	0
CASSVTGQGLDTQYF	0.0124436	1	0	0	0	0	0	0		0	0	0	0	0	0	0	0	0	0	0	0	0	0	0	0	0	0	0	0	0	0	0	0	0	0	0	0	0	0	0	0	0	0	0	0	0	0	0	0
CASSLAGRPSGNTIYF	0.0228087	4	0	0	0	0	0	0		0	0	0	0	0	0	0	0	0	0	0	0	0	0	0	0	0	0	0	0	0	0	0	0	0	0	0	0	0	0	0	0	0	0	0	0	0	0	0	0
CSVSGQETQYF	0.0190329	2	0	0	0	0	0	0		0	0	0	0	0	0	0	0	0	0	0	0	0	0	0	0	0	0	0	0	0	0	0	0	0	0	0	0	0	0	0	0	0	0	0	0	0	0	0	0
CASSQDGGYGYTF	0.00236438	2	0	0	0	0	0	0		0	0	0	0	0	0	0	0	0	0	0	0	0	0	0	0	0	0	0	0	0	0	0	0	0	0	0	0	0	0	0	0	3.976e-05	0	0	0	0	0	0	0
CAWRAGGTDTQYF	0.0100693	3	0	0	0	0	0	0		0	0	0	0	0	0	0	0	0	0	0	0	0	0	0	0	0	0	0	0	0	0	0	0	0	0	0	0	0	0	0	0	0	0	0	0	0	0	0	0
CASSLGQGYEQYF	0.00212066	21	2.044e-05	5.233e-05	3.349e-05	4.086e-05	0	1.68636e-05		0	0	0	0	3.808e-05	3.128e-05	0	0	0	0	0	0	0	0	0	0	1.704e-05	1.842e-05	0	0	0	0	3.762e-05	1.161e-05	0	0	0	0	2.089e-05	5.387e-05	1.146e-05	0	0	0	0	0	0	1.585e-05	3.288e-05	0
CSAESWGQGGMETQYF	0.00435636	2	0	0	0	0	0	0		0	0	0	0	0	0	0	0	0	0	0	0	0	0	0	0	0	0	0	0	0	0	0	0	0	0	0	0	0	0	0	0	0	0	0	0	0	0	0	0
CAISDGTGYLGSPLHF	0.00329867	2	0	0	0	0	0	0		0	0	0	0	0	0	0	0	0	0	0	0	0	0	0	0	0	0	0	0	0	0	0	0	0	0	0	0	0	0	0	0	0	0	0	0	0	0	0	0
CASSDEFSSYNSPLHF	0.00313681	2	0	0	0	0	0	0		0	0	0	0	0	0	0	0	0	0	0	0	0	0	0	0	0	0	0	0	0	0	0	0	0	0	0	0	0	0	0	0	0	0	0	0	0	0	0	0
CASTGGDREQFF	0.00265121	2	0	0	0	0	0	0		0	0	0	0	0	0	0	0	0	0	0	0	0	0	0	0	0	0	0	0	0	0	0	0	0	0	0	0	0	0	0	0	0	0	0	0	0	0	0	0
CSVEDSSYEQYF	0.00135629	2	0	0	0	0	0	5.6212e-06		0	0	0	0	0	0	0	0	0	0	0	0	0	0	0	0	0	0	0	0	0	0	0	0	0	0	0	0	0	0	0	0	0	0	0	0	0	0	0	0
CASSQQGANTEAFF	0.0008707	2	0	0	0	0	2.45652e-05	1.68636e-05		0	0	0	0	0	0	0	0	0	0	0	0	0	0	0	0	0	0	0	0	0	0	0	0	0	0	0	0	0	0	0	0	0	0	0	0	0	0	0	0
CSATVSFNTEAFF	0.00054697	1	0	0	0	0	0	0		0	0	0	0	0	0	0	0	0	0	0	0	0	0	0	0	0	0	0	0	0	0	0	0	0	0	0	0	0	0	0	0	0	0	0	0	0	0	0	0
CASSHHAGIEAFF	0.00054697	1	0	0	0	0	0	0		0	0	0	0	0	0	0	0	0	0	0	0	0	0	0	0	0	0	0	0	0	0	0	0	0	0	0	0	0	0	0	0	0	0	0	0	0	0	0	0
CASSKAGTGGEVYEQYF	0.00714952	12	0	0	0	0	0	0		0	0	0	0	0	0	0	0	0	0	0	0	0	0	0	0	0	0	0	0	0	0	0	0	0	0	0	0	0	0	0	0	0	0	0	0	0	0	0	0
CASEGTYNEQFF	0.00375436	9	0	0	0	0	0	0		0	0	0	0	0	0	0	0	0	0	0	0	0	0	0	0	0	0	0	0	0	0	0	0	0	0	0	0	0	0	0	0	0	0	0	0	0	0	0	0
CSARDVVRAFYGYTF	0.00972697	11	0	0	0	0	0	0		0	0	0	0	0	0	0	0	0	0	0	0	0	0	0	0	0	0	0	0	0	0	0	0	0	0	0	0	0	0	0	0	0	0	0	0	0	0	0	0
CASSSLQGTYSGNTIYF	0.00509484	12	0	0	0	0	0	0		0	0	0	0	0	0	0	0	0	0	0	0	0	0	0	0	0	0	0	0	0	0	0	0	0	0	0	0	0	0	0	0	0	0	0	0	0	0	0	0
CASSYWVMGTEAFF	0.00122183	4	0	0	0	0	0	0		0	0	0	0	0	0	0	0	0	0	0	0	0	0	0	0	0	0	0	0	0	0	0	0	0	0	0	0	0	0	0	0	0	0	0	0	0	0	0	0
CASSIEASYEQYF	0.00523343	7	0	0	0	0	0	0		0	0	0	0	0	0	0	0	0	0	0	0	0	0	0	0	0	0	0	0	0	0	0	0	0	0	0	0	0	0	0	0	0	0	0	0	0	0	0	0
CASSMNTEAFF	0.00063667	7	2.044e-05	0	0	8.17e-06	0	0		0	0	0	0	1.904e-05	1.043e-05	0	0	0	0	0	0	0	0	0	0	0	0	0	0	0	0	0	0	0	0	0	0	0	0	0	0	1.988e-05	0	0	0	0	0	0	0
CASSYSNQPQHF	0.00135915	15	1.022e-05	2.326e-05	1.339e-05	2.452e-05	4.91304e-05	0		0	0	0	0	0	0	0	0	0	0	3.401e-05	2.171e-05	0	0	0	0	1.704e-05	1.842e-05	0	0	0	0	0	0	0	0	0	0	0	3.591e-05	1.146e-05	0	1.988e-05	0	0	0	0	0	1.096e-05	0
CAWSEKGRVTNQPQHF	0.00334753	3	0	0	0	0	0	0		0	0	0	0	0	0	0	0	0	0	0	0	0	0	0	0	0	0	0	0	0	0	0	0	0	0	0	0	0	0	0	0	0	0	0	0	0	0	0	0
CASSLAGSGETQYF	0.00093759	6	0	0	6.7e-06	0	0	0		0	0	0	0	0	0	0	0	0	0	0	0	0	0	0	0	1.704e-05	0	0	0	0	0	0	0	0	0	0	0	0	0	1.146e-05	0	0	0	0	0	0	0	0	0
CASSGQTNTGELFF	0.0031792	4	0	5.81e-06	0	0	0	0		0	0	0	0	0	0	0	0	0	0	0	0	0	0	0	0	0	0	0	0	0	0	0	0	0	0	0	0	0	0	1.146e-05	0	0	0	0	0	0	0	0	0
CASTALGVGTEAFF	0.00251447	2	0	0	0	0	0	0		0	0	0	0	0	0	0	0	0	0	0	0	0	0	0	0	0	0	0	0	0	0	0	0	0	0	0	0	0	0	0	0	0	0	0	0	0	0	0	0
CSAREGLSAYEQYF	0.00240177	4	0	2.907e-05	2.009e-05	0	0	0		0	0	0	0	0	0	0	0	0	0	0	0	0	0	0	0	0	0	0	0	0	0	0	0	0	0	0	0	0	0	0	0	0	0	0	0	0	0	0	0
CASRGQGMNTEAFF	0.00190569	6	1.022e-05	5.81e-06	6.7e-06	0	0	0		0	0	0	0	0	0	0	0	0	0	0	0	0	0	0	0	0	0	0	0	0	0	0	0	0	0	0	0	0	0	0	0	0	0	0	0	0	0	0	0
CSAARAAGGTGANVLTF	0.00121955	2	0	0	0	0	0	0		0	0	0	0	0	0	0	0	0	0	0	0	0	0	0	0	0	0	0	0	0	0	0	0	0	0	0	0	0	0	0	0	0	0	0	0	0	0	0	0
CAIGGYGYGYTF	0.00117184	2	0	0	0	0	0	0		0	0	0	0	0	0	0	0	0	0	0	0	0	0	0	0	0	0	0	0	0	0	0	0	0	0	0	0	0	0	0	0	0	0	0	0	0	0	0	0
CASSLSGYNEQFF	0.00051354	8	0	5.81e-06	0	0	0	0		0	0	0	0	0	0	0	0	0	0	0	0	0	0	0	0	0	1.842e-05	0	0	0	0	0	0	0	0	0	0	0	0	0	1.476e-05	1.988e-05	0	0	0	0	0	0	0
CASSSLAGGQETQYF	0.00049847	6	0	5.81e-06	0	1.634e-05	6.1413e-05	0		0	0	0	0	3.808e-05	0	0	0	0	0	0	0	0	0	0	0	1.704e-05	0	0	0	0	0	0	0	0	0	0	0	0	0	0	0	0	0	0	0	0	0	1.096e-05	0
CASSWGETQYF	0.00271438	2	0	0	0	0	1.22826e-05	0		0	0	0	0	0	0	0	0	0	0	0	0	0	0	0	0	0	0	0	0	0	0	0	0	0	0	0	0	0	0	0	0	0	0	0	0	0	0	0	0
CASSTPGATEAFF	0.00042119	2	0	0	0	0	0	0		0	0	0	0	0	0	0	0	0	0	0	0	0	0	0	0	0	0	0	0	0	0	0	0	0	0	0	0	0	0	0	0	0	0	0	0	0	0	1.096e-05	0
CASSLDYNSPLHF	0.00043111	2	0	0	0	0	0	0		0	0	0	0	0	0	0	0	0	0	0	0	0	0	0	0	0	0	0	0	0	0	0	0	0	0	0	0	2.089e-05	0	0	0	0	0	0	0	0	0	0	0
CSVGSPLGNTEAFF	0.00041023	1	0	0	0	0	0	0		0	0	0	0	0	0	0	0	0	0	0	0	0	0	0	0	0	0	0	0	0	0	0	0	0	0	0	0	0	0	0	0	0	0	0	0	0	0	0	0
CSAFTGARGAEAFF	0.00041023	1	0	0	0	0	0	0		0	0	0	0	0	0	0	0	0	0	0	0	0	0	0	0	0	0	0	0	0	0	0	0	0	0	0	0	0	0	0	0	0	0	0	0	0	0	0	0
CATSIKAGTEAFF	0.00041023	1	0	0	0	0	0	0		0	0	0	0	0	0	0	0	0	0	0	0	0	0	0	0	0	0	0	0	0	0	0	0	0	0	0	0	0	0	0	0	0	0	0	0	0	0	0	0
CASSYQFGAFF	0.00041023	1	0	0	0	0	0	0		0	0	0	0	0	0	0	0	0	0	0	0	0	0	0	0	0	0	0	0	0	0	0	0	0	0	0	0	0	0	0	0	0	0	0	0	0	0	0	0
CASSTSGEPQHF	0.00041023	1	0	0	0	0	0	0		0	0	0	0	0	0	0	0	0	0	0	0	0	0	0	0	0	0	0	0	0	0	0	0	0	0	0	0	0	0	0	0	0	0	0	0	0	0	0	0
CASSQDFGEMWNQPQHF	0.00041023	1	0	0	0	0	0	0		0	0	0	0	0	0	0	0	0	0	0	0	0	0	0	0	0	0	0	0	0	0	0	0	0	0	0	0	0	0	0	0	0	0	0	0	0	0	0	0
CASSPRIWAGDTEAFF	0.00041023	1	0	0	0	0	0	0		0	0	0	0	0	0	0	0	0	0	0	0	0	0	0	0	0	0	0	0	0	0	0	0	0	0	0	0	0	0	0	0	0	0	0	0	0	0	0	0
CASSPGRASGDGNEQFF	0.00041023	1	0	0	0	0	0	0		0	0	0	0	0	0	0	0	0	0	0	0	0	0	0	0	0	0	0	0	0	0	0	0	0	0	0	0	0	0	0	0	0	0	0	0	0	0	0	0
CASSMESSGNTIYF	0.00041023	1	0	0	0	0	0	0		0	0	0	0	0	0	0	0	0	0	0	0	0	0	0	0	0	0	0	0	0	0	0	0	0	0	0	0	0	0	0	0	0	0	0	0	0	0	0	0
CASSLGLIEPQHF	0.00041023	1	0	0	0	0	0	0		0	0	0	0	0	0	0	0	0	0	0	0	0	0	0	0	0	0	0	0	0	0	0	0	0	0	0	0	0	0	0	0	0	0	0	0	0	0	0	0
CASSFRRGRPNTGELFF	0.00041023	1	0	0	0	0	0	0		0	0	0	0	0	0	0	0	0	0	0	0	0	0	0	0	0	0	0	0	0	0	0	0	0	0	0	0	0	0	0	0	0	0	0	0	0	0	0	0
CASRNSFGYEQYF	0.00041023	1	0	0	0	0	0	0		0	0	0	0	0	0	0	0	0	0	0	0	0	0	0	0	0	0	0	0	0	0	0	0	0	0	0	0	0	0	0	0	0	0	0	0	0	0	0	0
CASSLEGQHTDTQYF	0.00642799	12	0	0	0	0	0	0		0	0	0	0	0	0	0	0	0	0	0	0	0	0	0	0	0	0	0	0	0	0	0	0	0	0	0	0	0	0	0	0	0	0	0	0	0	0	0	0
CASSIGWGTEAFF	0.0008749	4	0	0	0	0	0	0		0	0	0	0	0	0	0	0	0	0	0	0	0	0	0	0	0	0	0	0	0	0	0	0	0	0	0	0	0	0	0	0	0	0	0	0	0	0	0	0
CASSRDRSEAFF	0.0017682	4	0	0	0	0	0	0		0	0	0	0	0	1.043e-05	0	0	0	0	0	0	0	0	0	0	0	0	0	0	0	0	0	0	0	0	0	0	0	0	0	0	0	0	0	0	0	1.585e-05	0	0
CASSPGQGIYGYTF	0.00310379	7	0	0	0	0	0	0		0	0	0	0	0	0	0	0	0	0	0	0	0	0	0	0	0	0	0	0	0	0	0	0	0	0	0	0	0	0	0	0	0	0	0	0	0	0	0	0
CASSTQREKLFF	0.00506473	8	0	0	0	0	0	0		0	0	0	0	0	0	0	0	0	0	0	0	0	0	0	0	0	0	0	0	0	0	0	0	0	0	0	0	0	0	0	0	0	0	0	0	0	0	0	0
CASSQETQYF	0.00177905	14	0	5.233e-05	2.679e-05	0	0	5.6212e-06		0	0	0	0	3.808e-05	4.171e-05	0	0	0	0	0	0	0	0	0	0	0	1.842e-05	0	0	0	0	1.881e-05	0	0	0	0	0	2.089e-05	0	0	4.427e-05	0	0	0	0	0	0	0	0
CATYTPTDTQYF	0.00230941	7	0	0	0	0	0	0		0	0	0	0	0	0	0	0	0	0	0	0	0	0	0	0	0	0	0	0	0	0	0	0	0	0	0	0	0	0	0	0	0	0	0	0	0	0	0	0
CSAAGSNEAFF	0.00262803	5	0	0	0	0	0	0		0	0	0	0	0	0	0	0	0	0	0	0	0	0	0	0	0	0	0	0	0	0	0	0	0	0	0	0	0	0	0	0	0	0	0	0	0	0	0	0
CASSELGSSEGYEQYF	0.00214965	4	0	0	0	0	0	0		0	0	0	0	0	0	0	0	0	0	0	0	0	0	0	0	0	0	0	0	0	0	0	0	0	0	0	0	0	0	0	0	0	0	0	0	0	0	0	0
CSARDRDRSSGNTIYF	0.00078281	3	0	0	0	0	0	0		0	0	0	0	0	0	0	0	0	0	0	0	0	0	0	0	0	0	0	0	0	0	0	0	0	0	0	0	0	0	0	0	0	0	0	0	0	0	0	0
CASSLSPHDRESTEAFF	0.00334891	2	0	0	0	0	0	0		0	0	0	0	0	0	0	0	0	0	0	0	0	0	0	0	0	0	0	0	0	0	0	0	0	0	0	0	0	0	0	0	0	0	0	0	0	0	0	0
CAWGQGALYSNQPQHF	0.00189213	2	0	0	0	0	0	0		0	0	0	0	0	0	0	0	0	0	0	0	0	0	0	0	0	0	0	0	0	0	0	0	0	0	0	0	0	0	0	0	0	0	0	0	0	0	0	0
CASSADGQANQPQHF	0.0015684	2	0	0	0	0	0	0		0	0	0	0	0	0	0	0	0	0	0	0	0	0	0	0	0	0	0	0	0	0	0	0	0	0	0	0	0	0	0	0	0	0	0	0	0	0	0	0
CASSPVGTGAYEQYF	0.00124467	2	0	0	0	0	0	0		0	0	0	0	0	0	0	0	0	0	0	0	0	0	0	0	0	0	0	0	0	0	0	0	0	0	0	0	0	0	0	0	0	0	0	0	0	0	0	0
CASSRGGYGYTF	0.0011369	6	0	0	6.7e-06	0	0	0		0	0	0	0	0	1.043e-05	0	0	0	0	1.701e-05	0	0	0	0	0	0	0	0	0	0	0	0	0	0	0	0	0	0	0	0	0	0	0	0	0	0	0	0	0
CASSLDRGQQETQYF	0.00108281	2	0	0	0	0	0	0		0	0	0	0	0	0	0	0	0	0	0	0	0	0	0	0	0	0	0	0	0	0	0	0	0	0	0	0	0	0	0	0	0	0	0	0	0	0	0	0
CASSLRDLGTEAFF	0.00092094	2	0	0	0	0	0	0		0	0	0	0	0	0	0	0	0	0	0	0	0	0	0	0	0	0	0	0	0	0	0	0	0	0	0	0	0	0	0	0	0	0	0	0	0	0	0	0
CAWSGQGQPQHF	0.00075908	2	0	0	0	0	0	0		0	0	0	0	0	0	0	0	0	0	0	0	0	0	0	0	0	0	0	0	0	0	0	0	0	0	0	0	0	0	0	0	0	0	0	0	0	0	0	0
CASSQEPGDSYNEQFF	0.00075908	2	0	0	0	0	0	0		0	0	0	0	0	0	0	0	0	0	0	0	0	0	0	0	0	0	0	0	0	0	0	0	0	0	0	0	0	0	0	0	0	0	0	0	0	0	0	0
CASRQGQGYEQYF	0.00075908	2	0	0	0	0	0	0		0	0	0	0	0	0	0	0	0	0	0	0	0	0	0	0	0	0	0	0	0	0	0	0	0	0	0	0	0	0	0	0	0	0	0	0	0	0	0	0
CSVRAASTDTQYF	0.00059721	2	0	0	0	0	0	0		0	0	0	0	0	0	0	0	0	0	0	0	0	0	0	0	0	0	0	0	0	0	0	0	0	0	0	0	0	0	0	0	0	0	0	0	0	0	0	0
CASSLEGGTGNEQYF	0.00059721	2	0	0	0	0	0	0		0	0	0	0	0	0	0	0	0	0	0	0	0	0	0	0	0	0	0	0	0	0	0	0	0	0	0	0	0	0	0	0	0	0	0	0	0	0	0	0
CASGTTGSYEQYF	0.00059721	2	0	0	0	0	0	0		0	0	0	0	0	0	0	0	0	0	0	0	0	0	0	0	0	0	0	0	0	0	0	0	0	0	0	0	0	0	0	0	0	0	0	0	0	0	0	0
CASSPGTGGNQPQHF	0.00058928	13	1.022e-05	1.163e-05	6.7e-06	1.634e-05	0	0		0	0	0	0	0	0	0	0	0	0	1.701e-05	0	0	0	0	0	0	0	0	0	0	0	0	1.161e-05	0	0	0	0	0	0	0	1.476e-05	0	0	0	0	0	0	0	0
CSARSGNTEAFF	0.00048203	6	0	0	0	8.17e-06	0	0		0	0	0	0	0	0	0	0	0	0	0	0	0	0	0	0	0	0	0	0	0	0	0	1.161e-05	0	0	0	0	0	0	1.146e-05	0	0	0	0	0	0	0	0	0
CASSYSSNYGYTF	0.00050476	5	0	0	0	0	0	0		0	0	0	0	0	0	0	0	0	0	3.401e-05	0	0	0	0	0	0	0	0	0	0	0	0	0	0	0	0	0	0	0	0	0	0	0	0	0	0	0	0	0
CASSLSGGAVETQYF	0.00045115	3	0	0	0	0	0	0		0	0	0	0	0	0	0	0	0	0	0	0	0	0	0	0	0	0	0	0	0	0	0	0	0	0	0	0	0	0	0	0	0	0	0	0	0	0	0	0
CASSAGSSYNEQFF	0.00044875	3	0	0	1.339e-05	0	0	0		0	0	0	0	0	0	0	0	0	0	0	0	0	0	0	0	0	0	0	0	0	0	0	0	0	0	0	0	0	0	0	0	0	0	0	0	0	0	0	0
CSARSLTSGGTDTGELFF	0.00043535	2	0	0	0	0	0	0		0	0	0	0	0	0	0	0	0	0	0	0	0	0	0	0	0	0	0	0	0	0	0	0	0	0	0	0	0	0	0	0	0	0	0	0	0	0	0	0
CASSQRQGGNEKLFF	0.00043535	2	0	0	0	0	0	0		0	0	0	0	0	0	0	0	0	0	0	0	0	0	0	0	0	0	0	0	0	0	0	0	0	0	0	0	0	0	0	0	0	0	0	0	0	0	0	0
CASSNAMDYPNTEAFF	0.00043535	2	0	0	0	0	0	0		0	0	0	0	0	0	0	0	0	0	0	0	0	0	0	0	0	0	0	0	0	0	0	0	0	0	0	0	0	0	0	0	0	0	0	0	0	0	0	0
CASSLTGEGSSSPLHF	0.00085227	2	0	0	0	0	0	0		0	0	0	0	0	0	0	0	0	0	0	0	0	0	0	0	0	0	0	0	0	0	0	0	0	0	0	0	0	0	0	0	0	0	0	0	0	0	0	0
CASSPGFSKHYEQYF	0.00041818	2	0	0	0	0	0	0		0	0	0	0	0	0	0	0	0	0	0	0	0	0	0	0	0	0	0	0	0	0	0	0	0	0	0	0	0	0	0	0	0	0	0	0	0	0	0	0
CASSAGKLTQYF	0.00041818	2	0	0	0	0	0	0		0	0	0	0	0	0	0	0	0	0	0	0	0	0	0	0	0	0	0	0	0	0	0	0	0	0	0	0	0	0	0	0	0	0	0	0	0	0	0	0
CSARATSGRGETQYF	0.00049591	2	0	0	0	0	0	0		0	0	0	0	0	0	0	0	0	0	0	0	0	0	0	0	0	0	0	0	0	0	0	0	0	0	0	0	0	0	0	0	0	0	0	0	0	0	0	0
CASSYPGVEKLFF	0.00123477	3	0	0	0	0	0	0		0	0	0	0	0	0	0	0	0	0	0	0	0	0	0	0	0	0	0	0	0	0	0	0	0	0	0	0	0	0	0	0	0	0	0	0	0	0	0	0
CSALPRSRQETQYF	0.00043349	2	0	0	0	0	0	0		0	0	0	0	0	0	0	0	0	0	0	0	0	0	0	0	0	0	0	0	0	0	0	0	0	0	0	0	0	0	0	0	0	0	0	0	0	0	0	0
CASSEEGGSHQPQHF	0.00043349	2	0	0	0	0	0	0		0	0	0	0	0	0	0	0	0	0	0	0	0	0	0	0	0	0	0	0	0	0	0	0	0	0	0	0	0	0	0	0	0	0	0	0	0	0	0	0
CASSLGQGAYEQYF	0.00093555	22	5.11e-05	5.815e-05	2.679e-05	4.903e-05	0	1.12424e-05		0	0	0	0	3.808e-05	0	0	0	0	0	1.701e-05	2.171e-05	0	0	0	0	0	3.684e-05	0	0	0	0	9.404e-05	2.322e-05	0	0	0	0	0	3.591e-05	3.438e-05	1.476e-05	1.988e-05	0	0	0	0	3.171e-05	1.096e-05	0
CASSLGTEAFF	0.00154736	19	2.044e-05	2.326e-05	6.028e-05	2.452e-05	0	2.24848e-05		0	0	0	0	0	3.128e-05	0	0	0	0	0	0	0	0	0	0	0	3.684e-05	0	0	0	0	3.762e-05	2.322e-05	0	0	0	0	0	1.796e-05	2.292e-05	1.476e-05	1.988e-05	0	0	0	0	0	6.575e-05	0
CASSLTGGTEAFF	0.00059087	17	1.022e-05	5.81e-06	2.679e-05	2.452e-05	8.59782e-05	1.12424e-05		0	0	0	0	0	0	0	0	0	0	0	2.171e-05	0	0	0	0	1.704e-05	1.842e-05	0	0	0	0	3.762e-05	1.161e-05	0	0	0	0	0	1.796e-05	1.146e-05	0	0	0	0	0	0	0	0	0
CASSLGGNEKLFF	0.00043973	10	3.066e-05	0	1.339e-05	0	0	0		0	0	0	0	0	1.043e-05	0	0	0	0	0	2.171e-05	0	0	0	0	0	0	0	0	0	0	0	0	0	0	0	0	2.089e-05	0	1.146e-05	0	0	0	0	0	0	0	0	0
CASSSQGNTEAFF	0.00037252	6	2.044e-05	0	1.339e-05	1.634e-05	0	0		0	0	0	0	0	0	0	0	0	0	0	0	0	0	0	0	0	0	0	0	0	0	0	0	0	0	0	0	0	3.591e-05	0	0	0	0	0	0	0	0	0	0
CASSQYSNQPQHF	0.00032132	4	0	0	0	8.17e-06	0	0		0	0	0	0	0	0	0	0	0	0	0	2.171e-05	0	0	0	0	0	0	0	0	0	0	0	0	0	0	0	0	0	1.796e-05	0	0	0	0	0	0	0	0	0	0
CASSLAGGPSYEQYF	0.00032142	4	0	1.163e-05	0	1.634e-05	0	0		0	0	0	0	0	0	0	0	0	0	0	0	0	0	0	0	0	0	0	0	0	0	0	0	0	0	0	0	0	0	0	0	0	0	0	0	0	0	0	0
CSARVGGTYEQYF	0.0002983	3	0	0	0	0	0	0		0	0	0	0	0	0	0	0	0	0	0	0	0	0	0	0	0	0	0	0	0	0	0	1.161e-05	0	0	0	0	0	0	0	0	0	0	0	0	0	0	0	0
CASSVTGNTIYF	0.0002904	3	1.022e-05	0	6.7e-06	0	0	0		0	0	0	0	0	0	0	0	0	0	0	0	0	0	0	0	0	0	0	0	0	0	0	0	0	0	0	0	0	0	0	0	0	0	0	0	0	0	0	0
CASSLGTSNEQFF	0.00031046	3	0	0	0	0	0	0		0	0	0	0	0	0	0	0	0	0	1.701e-05	0	0	0	0	0	0	0	0	0	0	0	0	0	0	0	0	0	0	0	0	0	0	0	0	0	0	0	0	0
CSVGGGYQETQYF	0.00028669	2	0	0	0	0	0	0		0	0	0	0	0	0	0	0	0	0	0	0	0	0	0	0	0	0	0	0	0	0	0	0	0	0	0	0	0	0	0	0	0	0	0	0	0	0	0	0
CSASGGIYEQYF	0.00028934	2	0	0	0	0	0	0		0	0	0	0	0	0	0	0	0	0	0	0	0	0	0	0	0	0	0	0	0	0	0	0	0	0	0	0	0	0	0	0	0	0	0	0	0	1.585e-05	0	0
CATSRAPQGNQPQHF	0.00028371	2	1.022e-05	0	0	0	0	0		0	0	0	0	0	0	0	0	0	0	0	0	0	0	0	0	0	0	0	0	0	0	0	0	0	0	0	0	0	0	0	0	0	0	0	0	0	0	0	0
CASSQVPAGANVLTF	0.00028444	2	0	0	0	0	0	0		0	0	0	0	0	0	0	0	0	0	0	0	0	0	0	0	0	0	0	0	0	0	0	0	0	0	0	0	0	0	0	0	0	0	0	0	0	0	1.096e-05	0
CASSQGAGGEQYF	0.00028018	2	0	0	6.7e-06	0	0	0		0	0	0	0	0	0	0	0	0	0	0	0	0	0	0	0	0	0	0	0	0	0	0	0	0	0	0	0	0	0	0	0	0	0	0	0	0	0	0	0
CASSPLSTEAFF	0.0002851	2	0	0	0	0	0	0		0	0	0	0	0	0	0	0	0	0	0	0	0	0	0	0	0	0	0	0	0	0	0	1.161e-05	0	0	0	0	0	0	0	0	0	0	0	0	0	0	0	0
CASSPLSGGNQPQHF	0.00028534	2	0	0	0	0	0	0		0	0	0	0	0	0	0	0	0	0	0	0	0	0	0	0	0	0	0	0	0	0	0	0	0	0	0	0	0	0	0	0	0	0	0	0	0	0	0	0
CASSGQGPNTEAFF	0.0002793	2	0	5.81e-06	0	0	0	0		0	0	0	0	0	0	0	0	0	0	0	0	0	0	0	0	0	0	0	0	0	0	0	0	0	0	0	0	0	0	0	0	0	0	0	0	0	0	0	0
CASSETALNTEAFF	0.00028018	2	0	0	6.7e-06	0	0	0		0	0	0	0	0	0	0	0	0	0	0	0	0	0	0	0	0	0	0	0	0	0	0	0	0	0	0	0	0	0	0	0	0	0	0	0	0	0	0	0
CASRTGVNTEAFF	0.00028669	2	0	0	0	0	1.22826e-05	0		0	0	0	0	0	0	0	0	0	0	0	0	0	0	0	0	0	0	0	0	0	0	0	0	0	0	0	0	0	0	0	0	0	0	0	0	0	0	0	0
RASSLGSGRGSTDTQYF	0.00027349	1	0	0	0	0	0	0		0	0	0	0	0	0	0	0	0	0	0	0	0	0	0	0	0	0	0	0	0	0	0	0	0	0	0	0	0	0	0	0	0	0	0	0	0	0	0	0
CWQGGFLNQPQHF	0.00027349	1	0	0	0	0	0	0		0	0	0	0	0	0	0	0	0	0	0	0	0	0	0	0	0	0	0	0	0	0	0	0	0	0	0	0	0	0	0	0	0	0	0	0	0	0	0	0
CSVYRGSTEAFF	0.00027349	1	0	0	0	0	0	0		0	0	0	0	0	0	0	0	0	0	0	0	0	0	0	0	0	0	0	0	0	0	0	0	0	0	0	0	0	0	0	0	0	0	0	0	0	0	0	0
CSVTGRYSYEQYF	0.00027349	1	0	0	0	0	0	0		0	0	0	0	0	0	0	0	0	0	0	0	0	0	0	0	0	0	0	0	0	0	0	0	0	0	0	0	0	0	0	0	0	0	0	0	0	0	0	0
CSVRTSSDEQFF	0.00027349	1	0	0	0	0	0	0		0	0	0	0	0	0	0	0	0	0	0	0	0	0	0	0	0	0	0	0	0	0	0	0	0	0	0	0	0	0	0	0	0	0	0	0	0	0	0	0
CSVRRGNTEAFF	0.00027349	1	0	0	0	0	0	0		0	0	0	0	0	0	0	0	0	0	0	0	0	0	0	0	0	0	0	0	0	0	0	0	0	0	0	0	0	0	0	0	0	0	0	0	0	0	0	0
CSVERMGVSGYTF	0.00027349	1	0	0	0	0	0	0		0	0	0	0	0	0	0	0	0	0	0	0	0	0	0	0	0	0	0	0	0	0	0	0	0	0	0	0	0	0	0	0	0	0	0	0	0	0	0	0
CSVELVLPNEQFF	0.00027349	1	0	0	0	0	0	0		0	0	0	0	0	0	0	0	0	0	0	0	0	0	0	0	0	0	0	0	0	0	0	0	0	0	0	0	0	0	0	0	0	0	0	0	0	0	0	0
CSVEEWSRGNTEAFF	0.00027349	1	0	0	0	0	0	0		0	0	0	0	0	0	0	0	0	0	0	0	0	0	0	0	0	0	0	0	0	0	0	0	0	0	0	0	0	0	0	0	0	0	0	0	0	0	0	0
CSAVVDGEAFF	0.00027349	1	0	0	0	0	0	0		0	0	0	0	0	0	0	0	0	0	0	0	0	0	0	0	0	0	0	0	0	0	0	0	0	0	0	0	0	0	0	0	0	0	0	0	0	0	0	0
CSATHGLAGNNEQFF	0.00027349	1	0	0	0	0	0	0		0	0	0	0	0	0	0	0	0	0	0	0	0	0	0	0	0	0	0	0	0	0	0	0	0	0	0	0	0	0	0	0	0	0	0	0	0	0	0	0
CSASDRGDVETQYF	0.00027349	1	0	0	0	0	0	0		0	0	0	0	0	0	0	0	0	0	0	0	0	0	0	0	0	0	0	0	0	0	0	0	0	0	0	0	0	0	0	0	0	0	0	0	0	0	0	0
CSARTSSETQYF	0.00027349	1	0	0	0	0	0	0		0	0	0	0	0	0	0	0	0	0	0	0	0	0	0	0	0	0	0	0	0	0	0	0	0	0	0	0	0	0	0	0	0	0	0	0	0	0	0	0
CSARPWTGRNYGYTF	0.00027349	1	0	0	0	0	0	0		0	0	0	0	0	0	0	0	0	0	0	0	0	0	0	0	0	0	0	0	0	0	0	0	0	0	0	0	0	0	0	0	0	0	0	0	0	0	0	0
CSARLGDRDTEAFF	0.00027349	1	0	0	0	0	0	0		0	0	0	0	0	0	0	0	0	0	0	0	0	0	0	0	0	0	0	0	0	0	0	0	0	0	0	0	0	0	0	0	0	0	0	0	0	0	0	0
CSARHGQSGEKLFF	0.00027349	1	0	0	0	0	0	0		0	0	0	0	0	0	0	0	0	0	0	0	0	0	0	0	0	0	0	0	0	0	0	0	0	0	0	0	0	0	0	0	0	0	0	0	0	0	0	0
CSARGQGGGTDTQYF	0.00027349	1	0	0	0	0	0	0		0	0	0	0	0	0	0	0	0	0	0	0	0	0	0	0	0	0	0	0	0	0	0	0	0	0	0	0	0	0	0	0	0	0	0	0	0	0	0	0
CSARGQAVEAFF	0.00027349	1	0	0	0	0	0	0		0	0	0	0	0	0	0	0	0	0	0	0	0	0	0	0	0	0	0	0	0	0	0	0	0	0	0	0	0	0	0	0	0	0	0	0	0	0	0	0
CSARGLEGAASPLHF	0.00027349	1	0	0	0	0	0	0		0	0	0	0	0	0	0	0	0	0	0	0	0	0	0	0	0	0	0	0	0	0	0	0	0	0	0	0	0	0	0	0	0	0	0	0	0	0	0	0
CSARDYGLWGVEAFF	0.00027349	1	0	0	0	0	0	0		0	0	0	0	0	0	0	0	0	0	0	0	0	0	0	0	0	0	0	0	0	0	0	0	0	0	0	0	0	0	0	0	0	0	0	0	0	0	0	0
CSARDLIASGSLETQYF	0.00027349	1	0	0	0	0	0	0		0	0	0	0	0	0	0	0	0	0	0	0	0	0	0	0	0	0	0	0	0	0	0	0	0	0	0	0	0	0	0	0	0	0	0	0	0	0	0	0
CSAQSPGGGGGSNQPQHF	0.00027349	1	0	0	0	0	0	0		0	0	0	0	0	0	0	0	0	0	0	0	0	0	0	0	0	0	0	0	0	0	0	0	0	0	0	0	0	0	0	0	0	0	0	0	0	0	0	0
CSAFGTGATGELFF	0.00027349	1	0	0	0	0	0	0		0	0	0	0	0	0	0	0	0	0	0	0	0	0	0	0	0	0	0	0	0	0	0	0	0	0	0	0	0	0	0	0	0	0	0	0	0	0	0	0
CAWTGADTQYF	0.00027349	1	0	0	0	0	0	0		0	0	0	0	0	0	0	0	0	0	0	0	0	0	0	0	0	0	0	0	0	0	0	0	0	0	0	0	0	0	0	0	0	0	0	0	0	0	0	0
CAWSRAQQETQYF	0.00027349	1	0	0	0	0	0	0		0	0	0	0	0	0	0	0	0	0	0	0	0	0	0	0	0	0	0	0	0	0	0	0	0	0	0	0	0	0	0	0	0	0	0	0	0	0	0	0
CAWSIGQGINIQYF	0.00027349	1	0	0	0	0	0	0		0	0	0	0	0	0	0	0	0	0	0	0	0	0	0	0	0	0	0	0	0	0	0	0	0	0	0	0	0	0	0	0	0	0	0	0	0	0	0	0
CAVTGTRRGGYTF	0.00027349	1	0	0	0	0	0	0		0	0	0	0	0	0	0	0	0	0	0	0	0	0	0	0	0	0	0	0	0	0	0	0	0	0	0	0	0	0	0	0	0	0	0	0	0	0	0	0
CATVEGPVVYEQYF	0.00027349	1	0	0	0	0	0	0		0	0	0	0	0	0	0	0	0	0	0	0	0	0	0	0	0	0	0	0	0	0	0	0	0	0	0	0	0	0	0	0	0	0	0	0	0	0	0	0
CATSSRTSGNEQFF	0.00027349	1	0	0	0	0	0	0		0	0	0	0	0	0	0	0	0	0	0	0	0	0	0	0	0	0	0	0	0	0	0	0	0	0	0	0	0	0	0	0	0	0	0	0	0	0	0	0
CATSGTARNPEAFF	0.00027349	1	0	0	0	0	0	0		0	0	0	0	0	0	0	0	0	0	0	0	0	0	0	0	0	0	0	0	0	0	0	0	0	0	0	0	0	0	0	0	0	0	0	0	0	0	0	0
CATSEHDLRVEQFF	0.00027349	1	0	0	0	0	0	0		0	0	0	0	0	0	0	0	0	0	0	0	0	0	0	0	0	0	0	0	0	0	0	0	0	0	0	0	0	0	0	0	0	0	0	0	0	0	0	0
CATGTPYEQYF	0.00027349	1	0	0	0	0	0	0		0	0	0	0	0	0	0	0	0	0	0	0	0	0	0	0	0	0	0	0	0	0	0	0	0	0	0	0	0	0	0	0	0	0	0	0	0	0	0	0
CASTWGEGTEAFF	0.00027349	1	0	0	0	0	0	0		0	0	0	0	0	0	0	0	0	0	0	0	0	0	0	0	0	0	0	0	0	0	0	0	0	0	0	0	0	0	0	0	0	0	0	0	0	0	0	0
CASTRTRYSNQPQHF	0.00027349	1	0	0	0	0	0	0		0	0	0	0	0	0	0	0	0	0	0	0	0	0	0	0	0	0	0	0	0	0	0	0	0	0	0	0	0	0	0	0	0	0	0	0	0	0	0	0
CASTPTTAPRDGYTF	0.00027349	1	0	0	0	0	0	0		0	0	0	0	0	0	0	0	0	0	0	0	0	0	0	0	0	0	0	0	0	0	0	0	0	0	0	0	0	0	0	0	0	0	0	0	0	0	0	0
CASTPRIVGVNQPQHF	0.00027349	1	0	0	0	0	0	0		0	0	0	0	0	0	0	0	0	0	0	0	0	0	0	0	0	0	0	0	0	0	0	0	0	0	0	0	0	0	0	0	0	0	0	0	0	0	0	0
CASSYWTATWSPLHF	0.00027349	1	0	0	0	0	0	0		0	0	0	0	0	0	0	0	0	0	0	0	0	0	0	0	0	0	0	0	0	0	0	0	0	0	0	0	0	0	0	0	0	0	0	0	0	0	0	0
CASSYGAVHYGYTF	0.00027349	1	0	0	0	0	0	0		0	0	0	0	0	0	0	0	0	0	0	0	0	0	0	0	0	0	0	0	0	0	0	0	0	0	0	0	0	0	0	0	0	0	0	0	0	0	0	0
CASSWSRNTGELFF	0.00027349	1	0	0	0	0	0	0		0	0	0	0	0	0	0	0	0	0	0	0	0	0	0	0	0	0	0	0	0	0	0	0	0	0	0	0	0	0	0	0	0	0	0	0	0	0	0	0
CASSWGEGNTGELFF	0.00027349	1	0	0	0	0	0	0		0	0	0	0	0	0	0	0	0	0	0	0	0	0	0	0	0	0	0	0	0	0	0	0	0	0	0	0	0	0	0	0	0	0	0	0	0	0	0	0
CASSVRLAIQETQYF	0.00027349	1	0	0	0	0	0	0		0	0	0	0	0	0	0	0	0	0	0	0	0	0	0	0	0	0	0	0	0	0	0	0	0	0	0	0	0	0	0	0	0	0	0	0	0	0	0	0
CASSVAYSNQPQHF	0.00027349	1	0	0	0	0	0	0		0	0	0	0	0	0	0	0	0	0	0	0	0	0	0	0	0	0	0	0	0	0	0	0	0	0	0	0	0	0	0	0	0	0	0	0	0	0	0	0
CASSVASSDTQYF	0.00027349	1	0	0	0	0	0	0		0	0	0	0	0	0	0	0	0	0	0	0	0	0	0	0	0	0	0	0	0	0	0	0	0	0	0	0	0	0	0	0	0	0	0	0	0	0	0	0
CASSVAEGLADTQYF	0.00027349	1	0	0	0	0	0	0		0	0	0	0	0	0	0	0	0	0	0	0	0	0	0	0	0	0	0	0	0	0	0	0	0	0	0	0	0	0	0	0	0	0	0	0	0	0	0	0
CASSTTRTGANVLTF	0.00027349	1	0	0	0	0	0	0		0	0	0	0	0	0	0	0	0	0	0	0	0	0	0	0	0	0	0	0	0	0	0	0	0	0	0	0	0	0	0	0	0	0	0	0	0	0	0	0
CASSTTGGISEKLFF	0.00027349	1	0	0	0	0	0	0		0	0	0	0	0	0	0	0	0	0	0	0	0	0	0	0	0	0	0	0	0	0	0	0	0	0	0	0	0	0	0	0	0	0	0	0	0	0	0	0
CASSTGDTNYGYTF	0.00027349	1	0	0	0	0	0	0		0	0	0	0	0	0	0	0	0	0	0	0	0	0	0	0	0	0	0	0	0	0	0	0	0	0	0	0	0	0	0	0	0	0	0	0	0	0	0	0
CASSTGAMNTEAFF	0.00027349	1	0	0	0	0	0	0		0	0	0	0	0	0	0	0	0	0	0	0	0	0	0	0	0	0	0	0	0	0	0	0	0	0	0	0	0	0	0	0	0	0	0	0	0	0	0	0
CASSSTSYLNTEAFF	0.00027349	1	0	0	0	0	0	0		0	0	0	0	0	0	0	0	0	0	0	0	0	0	0	0	0	0	0	0	0	0	0	0	0	0	0	0	0	0	0	0	0	0	0	0	0	0	0	0
CASSSSIGTQYF	0.00027349	1	0	0	0	0	0	0		0	0	0	0	0	0	0	0	0	0	0	0	0	0	0	0	0	0	0	0	0	0	0	0	0	0	0	0	0	0	0	0	0	0	0	0	0	0	0	0
CASSSSGVIKETQYF	0.00027349	1	0	0	0	0	0	0		0	0	0	0	0	0	0	0	0	0	0	0	0	0	0	0	0	0	0	0	0	0	0	0	0	0	0	0	0	0	0	0	0	0	0	0	0	0	0	0
CASSSRQGTQYF	0.00027349	1	0	0	0	0	0	0		0	0	0	0	0	0	0	0	0	0	0	0	0	0	0	0	0	0	0	0	0	0	0	0	0	0	0	0	0	0	0	0	0	0	0	0	0	0	0	0
CASSSPLEANYGYTF	0.00027349	1	0	0	0	0	0	0		0	0	0	0	0	0	0	0	0	0	0	0	0	0	0	0	0	0	0	0	0	0	0	0	0	0	0	0	0	0	0	0	0	0	0	0	0	0	0	0
CASSSHRVGQPQHF	0.00027349	1	0	0	0	0	0	0		0	0	0	0	0	0	0	0	0	0	0	0	0	0	0	0	0	0	0	0	0	0	0	0	0	0	0	0	0	0	0	0	0	0	0	0	0	0	0	0
CASSRTSGGEQGNEQFF	0.00027349	1	0	0	0	0	0	0		0	0	0	0	0	0	0	0	0	0	0	0	0	0	0	0	0	0	0	0	0	0	0	0	0	0	0	0	0	0	0	0	0	0	0	0	0	0	0	0
CASSRPGTGLTGELFF	0.00027349	1	0	0	0	0	0	0		0	0	0	0	0	0	0	0	0	0	0	0	0	0	0	0	0	0	0	0	0	0	0	0	0	0	0	0	0	0	0	0	0	0	0	0	0	0	0	0
CASSRGSAADTQYF	0.00027349	1	0	0	0	0	0	0		0	0	0	0	0	0	0	0	0	0	0	0	0	0	0	0	0	0	0	0	0	0	0	0	0	0	0	0	0	0	0	0	0	0	0	0	0	0	0	0
CASSREEANGYTF	0.00027349	1	0	0	0	0	0	0		0	0	0	0	0	0	0	0	0	0	0	0	0	0	0	0	0	0	0	0	0	0	0	0	0	0	0	0	0	0	0	0	0	0	0	0	0	0	0	0
CASSRDTGTEAFF	0.00027349	1	0	0	0	0	0	0		0	0	0	0	0	0	0	0	0	0	0	0	0	0	0	0	0	0	0	0	0	0	0	0	0	0	0	0	0	0	0	0	0	0	0	0	0	0	0	0
CASSQVRNTIYF	0.00027349	1	0	0	0	0	0	0		0	0	0	0	0	0	0	0	0	0	0	0	0	0	0	0	0	0	0	0	0	0	0	0	0	0	0	0	0	0	0	0	0	0	0	0	0	0	0	0
CASSQVNAGELFF	0.00027349	1	0	0	0	0	0	0		0	0	0	0	0	0	0	0	0	0	0	0	0	0	0	0	0	0	0	0	0	0	0	0	0	0	0	0	0	0	0	0	0	0	0	0	0	0	0	0
CASSQSGSRINQPQHF	0.00027349	1	0	0	0	0	0	0		0	0	0	0	0	0	0	0	0	0	0	0	0	0	0	0	0	0	0	0	0	0	0	0	0	0	0	0	0	0	0	0	0	0	0	0	0	0	0	0
CASSQFRGTTRDEGYGYTF	0.00027349	1	0	0	0	0	0	0		0	0	0	0	0	0	0	0	0	0	0	0	0	0	0	0	0	0	0	0	0	0	0	0	0	0	0	0	0	0	0	0	0	0	0	0	0	0	0	0
CASSQETYGYTF	0.00027349	1	0	0	0	0	0	0		0	0	0	0	0	0	0	0	0	0	0	0	0	0	0	0	0	0	0	0	0	0	0	0	0	0	0	0	0	0	0	0	0	0	0	0	0	0	0	0
CASSQEPRVVAGNTIYF	0.00027349	1	0	0	0	0	0	0		0	0	0	0	0	0	0	0	0	0	0	0	0	0	0	0	0	0	0	0	0	0	0	0	0	0	0	0	0	0	0	0	0	0	0	0	0	0	0	0
CASSQEFEETKNIQYF	0.00027349	1	0	0	0	0	0	0		0	0	0	0	0	0	0	0	0	0	0	0	0	0	0	0	0	0	0	0	0	0	0	0	0	0	0	0	0	0	0	0	0	0	0	0	0	0	0	0
CASSQDRWGTGELFF	0.00027349	1	0	0	0	0	0	0		0	0	0	0	0	0	0	0	0	0	0	0	0	0	0	0	0	0	0	0	0	0	0	0	0	0	0	0	0	0	0	0	0	0	0	0	0	0	0	0
CASSQDLTGQETQYF	0.00027349	1	0	0	0	0	0	0		0	0	0	0	0	0	0	0	0	0	0	0	0	0	0	0	0	0	0	0	0	0	0	0	0	0	0	0	0	0	0	0	0	0	0	0	0	0	0	0
CASSQDLFGTQYF	0.00027349	1	0	0	0	0	0	0		0	0	0	0	0	0	0	0	0	0	0	0	0	0	0	0	0	0	0	0	0	0	0	0	0	0	0	0	0	0	0	0	0	0	0	0	0	0	0	0
CASSQDGQGISSYEQYF	0.00027349	1	0	0	0	0	0	0		0	0	0	0	0	0	0	0	0	0	0	0	0	0	0	0	0	0	0	0	0	0	0	0	0	0	0	0	0	0	0	0	0	0	0	0	0	0	0	0
CASSQDGGGQGSFGSEAFF	0.00027349	1	0	0	0	0	0	0		0	0	0	0	0	0	0	0	0	0	0	0	0	0	0	0	0	0	0	0	0	0	0	0	0	0	0	0	0	0	0	0	0	0	0	0	0	0	0	0
CASSPWGRNSNQPQHF	0.00027349	1	0	0	0	0	0	0		0	0	0	0	0	0	0	0	0	0	0	0	0	0	0	0	0	0	0	0	0	0	0	0	0	0	0	0	0	0	0	0	0	0	0	0	0	0	0	0
CASSPVGASVSYNEQFF	0.00027349	1	0	0	0	0	0	0		0	0	0	0	0	0	0	0	0	0	0	0	0	0	0	0	0	0	0	0	0	0	0	0	0	0	0	0	0	0	0	0	0	0	0	0	0	0	0	0
CASSPSDRLNTEAFF	0.00027349	1	0	0	0	0	0	0		0	0	0	0	0	0	0	0	0	0	0	0	0	0	0	0	0	0	0	0	0	0	0	0	0	0	0	0	0	0	0	0	0	0	0	0	0	0	0	0
CASSPPREVVHEQYF	0.00027349	1	0	0	0	0	0	0		0	0	0	0	0	0	0	0	0	0	0	0	0	0	0	0	0	0	0	0	0	0	0	0	0	0	0	0	0	0	0	0	0	0	0	0	0	0	0	0
CASSPLVDTEAFF	0.00027349	1	0	0	0	0	0	0		0	0	0	0	0	0	0	0	0	0	0	0	0	0	0	0	0	0	0	0	0	0	0	0	0	0	0	0	0	0	0	0	0	0	0	0	0	0	0	0
CASSPGGGGTTEAFF	0.00027349	1	0	0	0	0	0	0		0	0	0	0	0	0	0	0	0	0	0	0	0	0	0	0	0	0	0	0	0	0	0	0	0	0	0	0	0	0	0	0	0	0	0	0	0	0	0	0
CASSMTWREGHNEQFF	0.00027349	1	0	0	0	0	0	0		0	0	0	0	0	0	0	0	0	0	0	0	0	0	0	0	0	0	0	0	0	0	0	0	0	0	0	0	0	0	0	0	0	0	0	0	0	0	0	0
CASSLVYSGNTIYF	0.00027349	1	0	0	0	0	0	0		0	0	0	0	0	0	0	0	0	0	0	0	0	0	0	0	0	0	0	0	0	0	0	0	0	0	0	0	0	0	0	0	0	0	0	0	0	0	0	0
CASSLVGTRNTGELFF	0.00027349	1	0	0	0	0	0	0		0	0	0	0	0	0	0	0	0	0	0	0	0	0	0	0	0	0	0	0	0	0	0	0	0	0	0	0	0	0	0	0	0	0	0	0	0	0	0	0
CASSLTGQSGTEAFF	0.00027349	1	0	0	0	0	0	0		0	0	0	0	0	0	0	0	0	0	0	0	0	0	0	0	0	0	0	0	0	0	0	0	0	0	0	0	0	0	0	0	0	0	0	0	0	0	0	0
CASSLSRGQPQHF	0.00027349	1	0	0	0	0	0	0		0	0	0	0	0	0	0	0	0	0	0	0	0	0	0	0	0	0	0	0	0	0	0	0	0	0	0	0	0	0	0	0	0	0	0	0	0	0	0	0
CASSLSQGGNSPLHF	0.00027349	1	0	0	0	0	0	0		0	0	0	0	0	0	0	0	0	0	0	0	0	0	0	0	0	0	0	0	0	0	0	0	0	0	0	0	0	0	0	0	0	0	0	0	0	0	0	0
CASSLSDRPGNTIYF	0.00027349	1	0	0	0	0	0	0		0	0	0	0	0	0	0	0	0	0	0	0	0	0	0	0	0	0	0	0	0	0	0	0	0	0	0	0	0	0	0	0	0	0	0	0	0	0	0	0
CASSLSAGTKMAFF	0.00027349	1	0	0	0	0	0	0		0	0	0	0	0	0	0	0	0	0	0	0	0	0	0	0	0	0	0	0	0	0	0	0	0	0	0	0	0	0	0	0	0	0	0	0	0	0	0	0
CASSLRSGGGETQYF	0.00027349	1	0	0	0	0	0	0		0	0	0	0	0	0	0	0	0	0	0	0	0	0	0	0	0	0	0	0	0	0	0	0	0	0	0	0	0	0	0	0	0	0	0	0	0	0	0	0
CASSLRGRGQGETQYF	0.00027349	1	0	0	0	0	0	0		0	0	0	0	0	0	0	0	0	0	0	0	0	0	0	0	0	0	0	0	0	0	0	0	0	0	0	0	0	0	0	0	0	0	0	0	0	0	0	0
CASSLRGAHTEAFF	0.00027349	1	0	0	0	0	0	0		0	0	0	0	0	0	0	0	0	0	0	0	0	0	0	0	0	0	0	0	0	0	0	0	0	0	0	0	0	0	0	0	0	0	0	0	0	0	0	0
CASSLRDSNSNEQFF	0.00027349	1	0	0	0	0	0	0		0	0	0	0	0	0	0	0	0	0	0	0	0	0	0	0	0	0	0	0	0	0	0	0	0	0	0	0	0	0	0	0	0	0	0	0	0	0	0	0
CASSLRDRQPQHF	0.00027349	1	0	0	0	0	0	0		0	0	0	0	0	0	0	0	0	0	0	0	0	0	0	0	0	0	0	0	0	0	0	0	0	0	0	0	0	0	0	0	0	0	0	0	0	0	0	0
CASSLQRELTDTQYF	0.00027349	1	0	0	0	0	0	0		0	0	0	0	0	0	0	0	0	0	0	0	0	0	0	0	0	0	0	0	0	0	0	0	0	0	0	0	0	0	0	0	0	0	0	0	0	0	0	0
CASSLPGHRGTNTEAFF	0.00027349	1	0	0	0	0	0	0		0	0	0	0	0	0	0	0	0	0	0	0	0	0	0	0	0	0	0	0	0	0	0	0	0	0	0	0	0	0	0	0	0	0	0	0	0	0	0	0
CASSLNRGRNTGELFF	0.00027349	1	0	0	0	0	0	0		0	0	0	0	0	0	0	0	0	0	0	0	0	0	0	0	0	0	0	0	0	0	0	0	0	0	0	0	0	0	0	0	0	0	0	0	0	0	0	0
CASSLLLAGGPDTQYF	0.00027349	1	0	0	0	0	0	0		0	0	0	0	0	0	0	0	0	0	0	0	0	0	0	0	0	0	0	0	0	0	0	0	0	0	0	0	0	0	0	0	0	0	0	0	0	0	0	0
CASSLGTSGGSDTQYF	0.00027349	1	0	0	0	0	0	0		0	0	0	0	0	0	0	0	0	0	0	0	0	0	0	0	0	0	0	0	0	0	0	0	0	0	0	0	0	0	0	0	0	0	0	0	0	0	0	0
CASSLGTGGSGNNQPQHF	0.00027349	1	0	0	0	0	0	0		0	0	0	0	0	0	0	0	0	0	0	0	0	0	0	0	0	0	0	0	0	0	0	0	0	0	0	0	0	0	0	0	0	0	0	0	0	0	0	0
CASSLGQSGGTEAFF	0.00027349	1	0	0	0	0	0	0		0	0	0	0	0	0	0	0	0	0	0	0	0	0	0	0	0	0	0	0	0	0	0	0	0	0	0	0	0	0	0	0	0	0	0	0	0	0	0	0
CASSLGQHANYGYTF	0.00027349	1	0	0	0	0	0	0		0	0	0	0	0	0	0	0	0	0	0	0	0	0	0	0	0	0	0	0	0	0	0	0	0	0	0	0	0	0	0	0	0	0	0	0	0	0	0	0
CASSLEWGLAGGPADEQFF	0.00027349	1	0	0	0	0	0	0		0	0	0	0	0	0	0	0	0	0	0	0	0	0	0	0	0	0	0	0	0	0	0	0	0	0	0	0	0	0	0	0	0	0	0	0	0	0	0	0
CASSLEGLSEAFF	0.00027349	1	0	0	0	0	0	0		0	0	0	0	0	0	0	0	0	0	0	0	0	0	0	0	0	0	0	0	0	0	0	0	0	0	0	0	0	0	0	0	0	0	0	0	0	0	0	0
CASSLDSGLGGYTF	0.00027349	1	0	0	0	0	0	0		0	0	0	0	0	0	0	0	0	0	0	0	0	0	0	0	0	0	0	0	0	0	0	0	0	0	0	0	0	0	0	0	0	0	0	0	0	0	0	0
CASSLDRGKSGYTF	0.00027349	1	0	0	0	0	0	0		0	0	0	0	0	0	0	0	0	0	0	0	0	0	0	0	0	0	0	0	0	0	0	0	0	0	0	0	0	0	0	0	0	0	0	0	0	0	0	0
CASSLDQRSGQPQHF	0.00027349	1	0	0	0	0	0	0		0	0	0	0	0	0	0	0	0	0	0	0	0	0	0	0	0	0	0	0	0	0	0	0	0	0	0	0	0	0	0	0	0	0	0	0	0	0	0	0
CASSLALVILRDTEAFF	0.00027349	1	0	0	0	0	0	0		0	0	0	0	0	0	0	0	0	0	0	0	0	0	0	0	0	0	0	0	0	0	0	0	0	0	0	0	0	0	0	0	0	0	0	0	0	0	0	0
CASSLAGGSGELFF	0.00027349	1	0	0	0	0	0	0		0	0	0	0	0	0	0	0	0	0	0	0	0	0	0	0	0	0	0	0	0	0	0	0	0	0	0	0	0	0	0	0	0	0	0	0	0	0	0	0
CASSKPTGTQEAFF	0.00027349	1	0	0	0	0	0	0		0	0	0	0	0	0	0	0	0	0	0	0	0	0	0	0	0	0	0	0	0	0	0	0	0	0	0	0	0	0	0	0	0	0	0	0	0	0	0	0
CASSIRGGRGYTF	0.00027349	1	0	0	0	0	0	0		0	0	0	0	0	0	0	0	0	0	0	0	0	0	0	0	0	0	0	0	0	0	0	0	0	0	0	0	0	0	0	0	0	0	0	0	0	0	0	0
CASSIQGRGSNQPQHF	0.00027349	1	0	0	0	0	0	0		0	0	0	0	0	0	0	0	0	0	0	0	0	0	0	0	0	0	0	0	0	0	0	0	0	0	0	0	0	0	0	0	0	0	0	0	0	0	0	0
CASSIGDTNQPQHF	0.00027349	1	0	0	0	0	0	0		0	0	0	0	0	0	0	0	0	0	0	0	0	0	0	0	0	0	0	0	0	0	0	0	0	0	0	0	0	0	0	0	0	0	0	0	0	0	0	0
CASSIAFRNYEQYF	0.00027349	1	0	0	0	0	0	0		0	0	0	0	0	0	0	0	0	0	0	0	0	0	0	0	0	0	0	0	0	0	0	0	0	0	0	0	0	0	0	0	0	0	0	0	0	0	0	0
CASSHRTSGTQETQYF	0.00027349	1	0	0	0	0	0	0		0	0	0	0	0	0	0	0	0	0	0	0	0	0	0	0	0	0	0	0	0	0	0	0	0	0	0	0	0	0	0	0	0	0	0	0	0	0	0	0
CASSHQQGLNTEAFF	0.00027349	1	0	0	0	0	0	0		0	0	0	0	0	0	0	0	0	0	0	0	0	0	0	0	0	0	0	0	0	0	0	0	0	0	0	0	0	0	0	0	0	0	0	0	0	0	0	0
CASSFSQVVQSRANVLTF	0.00027349	1	0	0	0	0	0	0		0	0	0	0	0	0	0	0	0	0	0	0	0	0	0	0	0	0	0	0	0	0	0	0	0	0	0	0	0	0	0	0	0	0	0	0	0	0	0	0
CASSFSGGPDTQYF	0.00027349	1	0	0	0	0	0	0		0	0	0	0	0	0	0	0	0	0	0	0	0	0	0	0	0	0	0	0	0	0	0	0	0	0	0	0	0	0	0	0	0	0	0	0	0	0	0	0
CASSFLRGNEQFF	0.00027349	1	0	0	0	0	0	0		0	0	0	0	0	0	0	0	0	0	0	0	0	0	0	0	0	0	0	0	0	0	0	0	0	0	0	0	0	0	0	0	0	0	0	0	0	0	0	0
CASSFDRVSNTGELFF	0.00027349	1	0	0	0	0	0	0		0	0	0	0	0	0	0	0	0	0	0	0	0	0	0	0	0	0	0	0	0	0	0	0	0	0	0	0	0	0	0	0	0	0	0	0	0	0	0	0
CASSEYKRNTIYF	0.00027349	1	0	0	0	0	0	0		0	0	0	0	0	0	0	0	0	0	0	0	0	0	0	0	0	0	0	0	0	0	0	0	0	0	0	0	0	0	0	0	0	0	0	0	0	0	0	0
CASSESSSGYGYTF	0.00027349	1	0	0	0	0	0	0		0	0	0	0	0	0	0	0	0	0	0	0	0	0	0	0	0	0	0	0	0	0	0	0	0	0	0	0	0	0	0	0	0	0	0	0	0	0	0	0
CASSEGLAIEQFF	0.00027349	1	0	0	0	0	0	0		0	0	0	0	0	0	0	0	0	0	0	0	0	0	0	0	0	0	0	0	0	0	0	0	0	0	0	0	0	0	0	0	0	0	0	0	0	0	0	0
CASSEFGTGGTEAFF	0.00027349	1	0	0	0	0	0	0		0	0	0	0	0	0	0	0	0	0	0	0	0	0	0	0	0	0	0	0	0	0	0	0	0	0	0	0	0	0	0	0	0	0	0	0	0	0	0	0
CASSDWTGQFRGYTF	0.00027349	1	0	0	0	0	0	0		0	0	0	0	0	0	0	0	0	0	0	0	0	0	0	0	0	0	0	0	0	0	0	0	0	0	0	0	0	0	0	0	0	0	0	0	0	0	0	0
CASSDLTGGPYNEQFF	0.00027349	1	0	0	0	0	0	0		0	0	0	0	0	0	0	0	0	0	0	0	0	0	0	0	0	0	0	0	0	0	0	0	0	0	0	0	0	0	0	0	0	0	0	0	0	0	0	0
CASSDHQNTEAFF	0.00027349	1	0	0	0	0	0	0		0	0	0	0	0	0	0	0	0	0	0	0	0	0	0	0	0	0	0	0	0	0	0	0	0	0	0	0	0	0	0	0	0	0	0	0	0	0	0	0
CASSAVQSTDTQYF	0.00027349	1	0	0	0	0	0	0		0	0	0	0	0	0	0	0	0	0	0	0	0	0	0	0	0	0	0	0	0	0	0	0	0	0	0	0	0	0	0	0	0	0	0	0	0	0	0	0
CASSANPSGAHYNEQFF	0.00027349	1	0	0	0	0	0	0		0	0	0	0	0	0	0	0	0	0	0	0	0	0	0	0	0	0	0	0	0	0	0	0	0	0	0	0	0	0	0	0	0	0	0	0	0	0	0	0
CASSAMGRGQPQHF	0.00027349	1	0	0	0	0	0	0		0	0	0	0	0	0	0	0	0	0	0	0	0	0	0	0	0	0	0	0	0	0	0	0	0	0	0	0	0	0	0	0	0	0	0	0	0	0	0	0
CASSAGTGFGQYF	0.00027349	1	0	0	0	0	0	0		0	0	0	0	0	0	0	0	0	0	0	0	0	0	0	0	0	0	0	0	0	0	0	0	0	0	0	0	0	0	0	0	0	0	0	0	0	0	0	0
CASSAGTGEMYEQFF	0.00027349	1	0	0	0	0	0	0		0	0	0	0	0	0	0	0	0	0	0	0	0	0	0	0	0	0	0	0	0	0	0	0	0	0	0	0	0	0	0	0	0	0	0	0	0	0	0	0
CASRTPTSAYGYTF	0.00027349	1	0	0	0	0	0	0		0	0	0	0	0	0	0	0	0	0	0	0	0	0	0	0	0	0	0	0	0	0	0	0	0	0	0	0	0	0	0	0	0	0	0	0	0	0	0	0
CASRSPKGYGYTF	0.00027349	1	0	0	0	0	0	0		0	0	0	0	0	0	0	0	0	0	0	0	0	0	0	0	0	0	0	0	0	0	0	0	0	0	0	0	0	0	0	0	0	0	0	0	0	0	0	0
CASRRLYKEQFF	0.00027349	1	0	0	0	0	0	0		0	0	0	0	0	0	0	0	0	0	0	0	0	0	0	0	0	0	0	0	0	0	0	0	0	0	0	0	0	0	0	0	0	0	0	0	0	0	0	0
CASRQSSGANVLTF	0.00027349	1	0	0	0	0	0	0		0	0	0	0	0	0	0	0	0	0	0	0	0	0	0	0	0	0	0	0	0	0	0	0	0	0	0	0	0	0	0	0	0	0	0	0	0	0	0	0
CASRPHYRELRSYNSPLHF	0.00027349	1	0	0	0	0	0	0		0	0	0	0	0	0	0	0	0	0	0	0	0	0	0	0	0	0	0	0	0	0	0	0	0	0	0	0	0	0	0	0	0	0	0	0	0	0	0	0
CASRLYRDGRSNEKLFF	0.00027349	1	0	0	0	0	0	0		0	0	0	0	0	0	0	0	0	0	0	0	0	0	0	0	0	0	0	0	0	0	0	0	0	0	0	0	0	0	0	0	0	0	0	0	0	0	0	0
CASRHDGNTEAFF	0.00027349	1	0	0	0	0	0	0		0	0	0	0	0	0	0	0	0	0	0	0	0	0	0	0	0	0	0	0	0	0	0	0	0	0	0	0	0	0	0	0	0	0	0	0	0	0	0	0
CASRDRGDEKLFF	0.00027349	1	0	0	0	0	0	0		0	0	0	0	0	0	0	0	0	0	0	0	0	0	0	0	0	0	0	0	0	0	0	0	0	0	0	0	0	0	0	0	0	0	0	0	0	0	0	0
CASRAGVLIIGELFF	0.00027349	1	0	0	0	0	0	0		0	0	0	0	0	0	0	0	0	0	0	0	0	0	0	0	0	0	0	0	0	0	0	0	0	0	0	0	0	0	0	0	0	0	0	0	0	0	0	0
CASPEGRGNNTEAFF	0.00027349	1	0	0	0	0	0	0		0	0	0	0	0	0	0	0	0	0	0	0	0	0	0	0	0	0	0	0	0	0	0	0	0	0	0	0	0	0	0	0	0	0	0	0	0	0	0	0
CASNGQGVTEAFF	0.00027349	1	0	0	0	0	0	0		0	0	0	0	0	0	0	0	0	0	0	0	0	0	0	0	0	0	0	0	0	0	0	0	0	0	0	0	0	0	0	0	0	0	0	0	0	0	0	0
CASMRSGANVLTF	0.00027349	1	0	0	0	0	0	0		0	0	0	0	0	0	0	0	0	0	0	0	0	0	0	0	0	0	0	0	0	0	0	0	0	0	0	0	0	0	0	0	0	0	0	0	0	0	0	0
CASKGGVYNEQFF	0.00027349	1	0	0	0	0	0	0		0	0	0	0	0	0	0	0	0	0	0	0	0	0	0	0	0	0	0	0	0	0	0	0	0	0	0	0	0	0	0	0	0	0	0	0	0	0	0	0
CASKGGKPMNTEAFF	0.00027349	1	0	0	0	0	0	0		0	0	0	0	0	0	0	0	0	0	0	0	0	0	0	0	0	0	0	0	0	0	0	0	0	0	0	0	0	0	0	0	0	0	0	0	0	0	0	0
CASIAAAKNYEQYF	0.00027349	1	0	0	0	0	0	0		0	0	0	0	0	0	0	0	0	0	0	0	0	0	0	0	0	0	0	0	0	0	0	0	0	0	0	0	0	0	0	0	0	0	0	0	0	0	0	0
CASGSYTDTGELFF	0.00027349	1	0	0	0	0	0	0		0	0	0	0	0	0	0	0	0	0	0	0	0	0	0	0	0	0	0	0	0	0	0	0	0	0	0	0	0	0	0	0	0	0	0	0	0	0	0	0
CASGSTGTANTGELFF	0.00027349	1	0	0	0	0	0	0		0	0	0	0	0	0	0	0	0	0	0	0	0	0	0	0	0	0	0	0	0	0	0	0	0	0	0	0	0	0	0	0	0	0	0	0	0	0	0	0
CASGSRKSQPQHF	0.00027349	1	0	0	0	0	0	0		0	0	0	0	0	0	0	0	0	0	0	0	0	0	0	0	0	0	0	0	0	0	0	0	0	0	0	0	0	0	0	0	0	0	0	0	0	0	0	0
CASGLDRGYYGYTF	0.00027349	1	0	0	0	0	0	0		0	0	0	0	0	0	0	0	0	0	0	0	0	0	0	0	0	0	0	0	0	0	0	0	0	0	0	0	0	0	0	0	0	0	0	0	0	0	0	0
CASEGQGTPNNEQFF	0.00027349	1	0	0	0	0	0	0		0	0	0	0	0	0	0	0	0	0	0	0	0	0	0	0	0	0	0	0	0	0	0	0	0	0	0	0	0	0	0	0	0	0	0	0	0	0	0	0
CASEDRGNAFF	0.00027349	1	0	0	0	0	0	0		0	0	0	0	0	0	0	0	0	0	0	0	0	0	0	0	0	0	0	0	0	0	0	0	0	0	0	0	0	0	0	0	0	0	0	0	0	0	0	0
CASALSVQETQYF	0.00027349	1	0	0	0	0	0	0		0	0	0	0	0	0	0	0	0	0	0	0	0	0	0	0	0	0	0	0	0	0	0	0	0	0	0	0	0	0	0	0	0	0	0	0	0	0	0	0
CASSKTSGGPSTQYF	0.0035626	8	0	0	0	0	0	0		0	0	0	0	0	0	0	0	0	0	0	0	0	0	0	0	0	0	0	0	0	0	0	0	0	0	0	0	0	0	0	0	0	0	0	0	0	0	0	0
CASSYGPRQFGYTF	0.0020812	7	0	0	0	0	0	0		0	0	0	0	0	0	0	0	0	0	0	0	0	0	0	0	0	0	0	0	0	0	0	0	0	0	0	0	0	0	0	0	0	0	0	0	0	0	0	0
CASSPGREVIREQYF	0.00310052	9	0	0	0	0	0	0		0	0	0	0	0	0	0	0	0	0	0	0	0	0	0	0	0	0	0	0	0	0	0	0	0	0	0	0	0	0	0	0	0	0	0	0	0	0	0	0
CASSPAGLQRGGPTDTQYF	0.00113775	6	0	0	0	0	0	0		0	0	0	0	0	0	0	0	0	0	0	0	0	0	0	0	0	0	0	0	0	0	0	0	0	0	0	0	0	0	0	0	0	0	0	0	0	0	0	0
CAWVLRAGVEQYF	0.00065208	3	0	0	0	0	0	0		0	0	0	0	0	0	0	0	0	0	0	0	0	0	0	0	0	0	0	0	0	0	0	0	0	0	0	0	0	0	0	0	0	0	0	0	0	0	0	0
CASSLANLGGEKFNEQFF	0.00065208	3	0	0	0	0	0	0		0	0	0	0	0	0	0	0	0	0	0	0	0	0	0	0	0	0	0	0	0	0	0	0	0	0	0	0	0	0	0	0	0	0	0	0	0	0	0	0
CASSLVLAGRETQYF	0.00062834	3	0	0	0	0	0	0		0	0	0	0	0	0	0	0	0	0	0	0	0	0	0	0	0	0	0	0	0	0	0	0	0	0	0	0	0	0	0	0	0	0	0	0	0	0	0	0
CASSYSPDGGYTF	0.00044931	3	0	0	0	0	0	0		0	0	0	0	0	0	0	0	0	0	0	0	0	0	0	0	0	0	0	0	0	0	0	0	0	0	0	0	0	0	0	0	0	0	0	0	0	0	0	0
CASSRTSGADTQYF	0.00134354	5	1.022e-05	0	0	0	0	0		0	0	0	0	0	0	0	0	0	0	0	0	0	0	0	0	0	0	0	0	0	0	0	0	0	0	0	0	0	0	0	0	0	0	0	0	0	0	0	0
CASSLPGLPGTDTQYF	0.00030461	2	0	0	0	0	0	0		0	0	0	0	0	0	0	0	0	0	0	0	0	0	0	0	0	0	0	0	0	0	0	0	0	0	0	0	0	0	0	0	0	0	0	0	0	0	0	0
CSASLAEETQYF	0.00418083	9	0	0	0	0	0	0		0	0	0	0	0	0	0	0	0	0	0	0	0	0	0	0	0	0	0	0	0	0	0	0	0	0	0	0	0	0	0	0	0	0	0	0	0	0	0	0
CASSTTSGSYNEQFF	0.00284991	10	0	0	0	8.17e-06	0	0		0	0	0	0	0	0	0	0	0	0	0	0	0	0	0	0	0	0	0	0	0	0	0	0	0	0	0	0	0	0	0	0	0	0	0	0	0	0	0	0
CASSVGGSGYTF	0.00205804	4	0	0	0	0	0	0		0	0	0	0	0	0	0	0	0	0	0	0	0	0	0	0	0	0	0	0	0	0	0	0	0	0	0	0	0	0	0	0	0	0	0	0	0	0	0	0
CASSAQGAYQPQHF	0.00170401	4	0	0	0	0	0	0		0	0	0	0	0	0	0	0	0	0	0	0	0	0	0	0	0	0	0	0	0	0	0	0	0	0	0	0	0	0	0	0	0	0	0	0	0	0	0	0
CSARDNSYEQYF	0.00090203	4	1.022e-05	0	0	0	0	1.12424e-05		0	0	0	0	0	2.085e-05	0	0	0	0	0	0	0	0	0	0	0	0	0	0	0	0	0	0	0	0	0	0	0	0	0	0	0	0	0	0	0	0	0	0
CASSQVSSGSSVTQYF	0.00087096	2	0	0	0	0	0	0		0	0	0	0	0	0	0	0	0	0	0	0	0	0	0	0	0	0	0	0	0	0	0	0	0	0	0	0	0	0	0	0	0	0	0	0	0	0	0	0
CASTTTGGRASEQYF	0.00340607	8	0	0	0	0	0	0		0	0	0	0	0	0	0	0	0	0	0	0	0	0	0	0	0	0	0	0	0	0	0	0	0	0	0	0	0	0	0	0	0	0	0	0	0	0	0	0
CSATSTILGYSNQPQHF	0.00109846	5	0	0	0	0	0	0		0	0	0	0	0	0	0	0	0	0	0	0	0	0	0	0	0	0	0	0	0	0	0	0	0	0	0	0	0	0	0	0	0	0	0	0	0	0	0	0
CSVFYGTSTYEQYF	0.00059178	4	0	0	0	0	0	0		0	0	0	0	0	0	0	0	0	0	0	0	0	0	0	0	0	0	0	0	0	0	0	0	0	0	0	0	0	0	0	0	0	0	0	0	0	0	0	0
CASSPLGGEAFF	0.00279248	4	0	0	0	0	0	0		0	0	0	0	0	0	0	0	0	0	0	0	0	0	0	0	0	0	0	0	0	0	0	0	0	0	0	0	0	0	0	0	0	0	0	0	0	0	0	0
CASSYGWESREQYF	0.00120684	4	0	0	0	0	0	0		0	0	0	0	0	0	0	0	0	0	0	0	0	0	0	0	0	0	0	0	0	0	0	0	0	0	0	0	0	0	0	0	0	0	0	0	0	0	0	0
CSARTGRSYEQYF	0.00135076	3	0	0	0	0	0	0		0	0	0	0	0	0	0	0	0	0	0	0	0	0	0	0	0	0	0	0	0	0	0	0	0	0	0	0	0	0	0	0	0	0	0	0	0	0	0	0
CSAGPHGGGGKQGQYF	0.00136582	5	0	0	0	0	0	0		0	0	0	0	0	0	0	0	0	0	0	0	0	0	0	0	0	0	0	0	0	0	0	0	0	0	0	0	0	0	0	0	0	0	0	0	0	0	0	0
CASSIDRGRGANTEAFF	0.00069269	3	0	0	0	0	0	0		0	0	0	0	0	0	0	0	0	0	0	0	0	0	0	0	0	0	0	0	0	0	0	0	0	0	0	0	0	0	0	0	0	0	0	0	0	0	0	0
CSASEDRTDTQYF	0.00042559	2	0	0	0	0	0	0		0	0	0	0	0	0	0	0	0	0	0	0	0	0	0	0	0	0	0	0	0	0	0	0	0	0	0	0	0	0	0	0	0	0	0	0	0	0	0	0
CASRPTGSVLETQYF	0.00042559	2	0	0	0	0	0	0		0	0	0	0	0	0	0	0	0	0	0	0	0	0	0	0	0	0	0	0	0	0	0	0	0	0	0	0	0	0	0	0	0	0	0	0	0	0	0	0
CASSFQGAEQYF	0.0009842	2	0	0	0	0	0	0		0	0	0	0	0	0	0	0	0	0	0	0	0	0	0	0	0	0	0	0	0	0	0	0	0	0	0	0	0	0	0	0	0	0	0	0	0	0	0	0
CASSFKGVYEQYF	0.0009842	2	0	0	0	0	0	0		0	0	0	0	0	0	0	0	0	0	0	0	0	0	0	0	0	0	0	0	0	0	0	0	0	0	0	0	0	0	0	0	0	0	0	0	0	0	0	0
CASSDILGTSNTGELFF	0.0009842	2	0	0	0	0	0	0		0	0	0	0	0	0	0	0	0	0	0	0	0	0	0	0	0	0	0	0	0	0	0	0	0	0	0	0	0	0	0	0	0	0	0	0	0	0	0	0
CAIRPDLSGNTIYF	0.00083167	2	0	0	0	0	0	0		0	0	0	0	0	0	0	0	0	0	0	0	0	0	0	0	0	0	0	0	0	0	0	0	0	0	0	0	0	0	0	0	0	0	0	0	0	0	0	0
CASSDSSGSTDTQYF	0.00115262	22	5.11e-05	1.744e-05	2.009e-05	3.269e-05	1.22826e-05	0		0	0	0	0	0	3.128e-05	0	0	0	0	0	2.171e-05	0	0	0	0	0	5.526e-05	0	0	0	0	1.881e-05	1.161e-05	0	0	0	0	4.177e-05	1.796e-05	1.146e-05	7.378e-05	1.988e-05	0	0	0	0	1.585e-05	1.096e-05	0
CSARGGTGVYGYTF	0.00118663	4	0	0	0	0	0	0		0	0	0	0	0	0	0	0	0	0	0	0	0	0	0	0	0	0	0	0	0	0	0	0	0	0	0	0	0	0	0	0	0	0	0	0	0	0	0	0
CASSLVTDTQYF	0.00064135	12	0	5.81e-06	0	2.452e-05	0	0		0	0	0	0	1.904e-05	2.085e-05	0	0	0	0	0	0	0	0	0	0	1.704e-05	1.842e-05	0	0	0	0	0	0	0	0	0	0	0	0	0	0	0	0	0	0	0	0	1.096e-05	0
CAWSVSLLEREKIYNEQFF	0.00048421	2	0	0	0	0	0	0		0	0	0	0	0	0	0	0	0	0	0	0	0	0	0	0	0	0	0	0	0	0	0	0	0	0	0	0	0	0	0	0	0	0	0	0	0	0	0	0
CASSEGTSGVSDTQYF	0.00048421	2	0	0	0	0	0	0		0	0	0	0	0	0	0	0	0	0	0	0	0	0	0	0	0	0	0	0	0	0	0	0	0	0	0	0	0	0	0	0	0	0	0	0	0	0	0	0
CASTPQGAETQYF	0.00191725	2	0	0	0	0	0	0		0	0	0	0	0	0	0	0	0	0	0	0	0	0	0	0	0	0	0	0	0	0	0	0	0	0	0	0	0	0	0	0	0	0	0	0	0	0	0	0
CASSESPSTDTQYF	0.00176859	3	0	0	0	0	0	0		0	0	0	0	0	0	0	0	0	0	0	0	0	0	0	0	0	0	0	0	0	0	0	0	0	0	0	0	0	0	0	0	0	0	0	0	0	0	0	0
CASSLQNLNQPQHF	0.00110793	2	0	0	0	0	0	0		0	0	0	0	0	0	0	0	0	0	0	0	0	0	0	0	0	0	0	0	0	0	0	0	0	0	0	0	0	0	0	0	0	0	0	0	0	0	0	0
CASSLEAGVNQPQHF	0.00094607	2	0	0	0	0	0	0		0	0	0	0	0	0	0	0	0	0	0	0	0	0	0	0	0	0	0	0	0	0	0	0	0	0	0	0	0	0	0	0	0	0	0	0	0	0	0	0
CAWSGFSSNQPQHF	0.0007842	2	0	0	0	0	0	0		0	0	0	0	0	0	0	0	0	0	0	0	0	0	0	0	0	0	0	0	0	0	0	0	0	0	0	0	0	0	0	0	0	0	0	0	0	0	0	0
CASSFGAGWSTDTQYF	0.00063256	3	1.022e-05	0	0	0	0	0		0	0	0	0	0	0	0	0	0	0	0	0	0	0	0	0	0	0	0	0	0	0	0	0	0	0	0	0	0	0	0	0	0	0	0	0	0	0	0	0
CAWSQTGQTTQYF	0.00062234	2	0	0	0	0	0	0		0	0	0	0	0	0	0	0	0	0	0	0	0	0	0	0	0	0	0	0	0	0	0	0	0	0	0	0	0	0	0	0	0	0	0	0	0	0	0	0
CASSVPGLAGTYEQYF	0.00062234	2	0	0	0	0	0	0		0	0	0	0	0	0	0	0	0	0	0	0	0	0	0	0	0	0	0	0	0	0	0	0	0	0	0	0	0	0	0	0	0	0	0	0	0	0	0	0
CASSQRGRSRGAQVTEAFF	0.00062234	2	0	0	0	0	0	0		0	0	0	0	0	0	0	0	0	0	0	0	0	0	0	0	0	0	0	0	0	0	0	0	0	0	0	0	0	0	0	0	0	0	0	0	0	0	0	0
CASSLRTSGGAGELFF	0.00072757	3	0	0	0	0	0	0		0	0	0	0	0	0	0	0	0	0	0	0	0	0	0	0	0	0	0	0	0	0	0	0	0	0	0	0	0	0	0	0	0	0	0	0	0	0	0	0
CASRPNTEAFF	0.00050161	4	0	1.163e-05	0	0	0	0		0	0	0	0	0	0	0	0	0	0	0	0	0	0	0	0	0	0	0	0	0	0	0	0	0	0	0	0	0	0	0	2.951e-05	0	0	0	0	0	0	0	0
CASSLAPISYEQYF	0.00046047	2	0	0	0	0	0	0		0	0	0	0	0	0	0	0	0	0	0	0	0	0	0	0	0	0	0	0	0	0	0	0	0	0	0	0	0	0	0	0	0	0	0	0	0	0	0	0
CASSILARGGNQPQHF	0.00046047	2	0	0	0	0	0	0		0	0	0	0	0	0	0	0	0	0	0	0	0	0	0	0	0	0	0	0	0	0	0	0	0	0	0	0	0	0	0	0	0	0	0	0	0	0	0	0
CASSEQRQDYGYTF	0.00046047	2	0	0	0	0	0	0		0	0	0	0	0	0	0	0	0	0	0	0	0	0	0	0	0	0	0	0	0	0	0	0	0	0	0	0	0	0	0	0	0	0	0	0	0	0	0	0
CASRTDLNQPQHF	0.00046047	2	0	0	0	0	0	0		0	0	0	0	0	0	0	0	0	0	0	0	0	0	0	0	0	0	0	0	0	0	0	0	0	0	0	0	0	0	0	0	0	0	0	0	0	0	0	0
CSARTGGVNSPLHF	0.0004433	3	0	0	0	0	0	0		0	0	0	0	0	0	0	0	0	0	0	0	0	0	0	0	0	0	0	0	0	0	0	0	0	0	0	0	0	0	0	0	0	0	0	0	0	0	0	0
CASSFRVEDTDTQYF	0.00094812	5	0	0	0	0	0	0		0	0	0	0	0	0	0	0	0	0	0	0	0	0	0	0	0	0	0	0	0	0	0	0	0	0	0	0	0	0	0	0	0	0	0	0	0	0	0	0
CASSDTYEQYF	0.0005257	6	0	5.81e-06	0	0	0	0		0	0	0	0	0	0	0	0	0	0	0	0	0	0	0	0	0	0	0	0	0	0	0	0	0	0	0	0	0	0	4.584e-05	0	0	0	0	0	0	0	0	0
CASSPGTGGYGYTF	0.00037418	7	0	0	1.339e-05	8.17e-06	2.45652e-05	0		0	0	0	0	1.904e-05	0	0	0	0	0	1.701e-05	0	0	0	0	0	0	0	0	0	0	0	0	0	0	0	0	0	0	1.796e-05	0	0	0	0	0	0	0	0	0	0
CSARDQQGWTEAFF	0.00029861	2	0	0	0	0	0	0		0	0	0	0	0	0	0	0	0	0	0	0	0	0	0	0	0	0	0	0	0	0	0	0	0	0	0	0	0	0	0	0	0	0	0	0	0	0	0	0
CASSRGTGFASAQYF	0.00029861	2	0	0	0	0	0	0		0	0	0	0	0	0	0	0	0	0	0	0	0	0	0	0	0	0	0	0	0	0	0	0	0	0	0	0	0	0	0	0	0	0	0	0	0	0	0	0
CASSPRTGTPYEQYF	0.00029861	2	0	0	0	0	0	0		0	0	0	0	0	0	0	0	0	0	0	0	0	0	0	0	0	0	0	0	0	0	0	0	0	0	0	0	0	0	0	0	0	0	0	0	0	0	0	0
CASSLYRRGSYEQYF	0.00029861	2	0	0	0	0	0	0		0	0	0	0	0	0	0	0	0	0	0	0	0	0	0	0	0	0	0	0	0	0	0	0	0	0	0	0	0	0	0	0	0	0	0	0	0	0	0	0
CASSWGSVLSPQETQYF	0.00028144	2	0	0	0	0	0	0		0	0	0	0	0	0	0	0	0	0	0	0	0	0	0	0	0	0	0	0	0	0	0	0	0	0	0	0	0	0	0	0	0	0	0	0	0	0	0	0
CASSFGFGRGGYEQYF	0.00051916	3	0	0	0	0	0	0		0	0	0	0	0	0	0	0	0	0	0	0	0	0	0	0	0	0	0	0	0	0	0	0	0	0	0	0	0	0	0	0	0	0	0	0	0	0	0	0
CASSLRGDEKLFF	0.00038083	4	0	5.81e-06	0	0	0	0		0	0	0	0	0	0	0	0	0	0	0	0	0	0	0	0	0	0	0	0	0	0	0	0	0	0	0	0	0	0	0	0	0	0	0	0	0	1.585e-05	0	0
CASSGNRGRVAKNIQYF	0.00035916	2	0	0	0	0	0	0		0	0	0	0	0	0	0	0	0	0	0	0	0	0	0	0	0	0	0	0	0	0	0	0	0	0	0	0	0	0	0	0	0	0	0	0	0	0	0	0
CASSLRDITGYTEAFF	0.00067093	2	0	0	0	0	0	0		0	0	0	0	0	0	0	0	0	0	0	0	0	0	0	0	0	0	0	0	0	0	0	0	0	0	0	0	0	0	0	0	0	0	0	0	0	0	0	0
CASSFGGSSYEQYF	0.00142588	26	8.177e-05	4.652e-05	8.707e-05	4.903e-05	0.000208804	0.000123666		0	0	0	0	3.808e-05	1.043e-05	0	0	0	0	1.701e-05	2.171e-05	0	0	0	0	0	1.842e-05	0	0	0	0	1.881e-05	3.483e-05	0	0	0	0	4.177e-05	1.796e-05	2.292e-05	1.476e-05	1.988e-05	0	0	0	0	3.171e-05	3.288e-05	0
CASSQAGGISYEQYF	0.0004238	3	0	0	0	0	0	0		0	0	0	0	0	0	0	0	0	0	0	0	0	0	0	0	0	0	0	0	0	0	0	0	0	0	0	0	0	0	0	0	0	0	0	0	0	0	0	0
CASLSAESSYNEQFF	0.00040384	2	0	0	0	0	0	0		0	0	0	0	0	0	0	0	0	0	0	0	0	0	0	0	0	0	0	0	0	0	0	0	0	0	0	0	0	0	0	0	0	0	0	0	0	0	0	0
CASSQVRASGGTTYNEQFF	0.00089836	2	0	0	0	0	0	0		0	0	0	0	0	0	0	0	0	0	0	0	0	0	0	0	0	0	0	0	0	0	0	0	0	0	0	0	0	0	0	0	0	0	0	0	0	0	0	0
CASSAVYSGNQPQHF	0.00089836	2	0	0	0	0	0	0		0	0	0	0	0	0	0	0	0	0	0	0	0	0	0	0	0	0	0	0	0	0	0	0	0	0	0	0	0	0	0	0	0	0	0	0	0	0	0	0
CASSLTYEQYF	0.00119626	27	4.088e-05	4.652e-05	6.7e-06	3.269e-05	6.1413e-05	6.74544e-05		0	0	0	0	3.808e-05	2.085e-05	0	0	0	0	1.701e-05	2.171e-05	0	0	0	0	3.409e-05	5.526e-05	0	0	0	0	5.642e-05	3.483e-05	0	0	0	0	4.177e-05	0	2.292e-05	5.902e-05	1.988e-05	0	0	0	0	4.756e-05	4.384e-05	0
CASSYQETQYF	0.00114133	17	4.088e-05	4.652e-05	2.009e-05	8.17e-06	1.22826e-05	5.6212e-06		0	0	0	0	0	2.085e-05	0	0	0	0	0	0	0	0	0	0	0	1.842e-05	0	0	0	0	1.881e-05	2.322e-05	0	0	0	0	0	1.796e-05	2.292e-05	0	5.964e-05	0	0	0	0	0	1.096e-05	0
CASSYGGWNTEAFF	0.00337492	16	0	2.326e-05	6.7e-06	8.17e-06	1.22826e-05	7.30756e-05		0	0	0	0	7.616e-05	0	0	0	0	0	0.00295928	0	0	0	0	0	1.704e-05	0	0	0	0	0	1.881e-05	1.161e-05	0	0	0	0	2.089e-05	0	2.292e-05	0	0	0	0	0	0	0	0	0
CASSLDRNTEAFF	0.00043011	12	4.088e-05	5.81e-06	2.679e-05	8.17e-06	0.000171956	0.000118045		0	0	0	0	0	0	0	0	0	0	0	0	0	0	0	0	0	0	0	0	0	0	0	0	0	0	0	0	0	3.591e-05	0	7.378e-05	0	0	0	0	0	0	2.192e-05	0
CASSLLNTEAFF	0.00032659	11	3.066e-05	3.489e-05	6.7e-06	0	0	0		0	0	0	0	0	0	0	0	0	0	0	0	0	0	0	0	1.704e-05	1.842e-05	0	0	0	0	0	0	0	0	0	0	0	1.796e-05	1.146e-05	0	0	0	0	0	0	0	0	0
CASSLGQYNEQFF	0.00027211	11	1.022e-05	1.163e-05	0	1.634e-05	0	0		0	0	0	0	0	1.043e-05	0	0	0	0	0	2.171e-05	0	0	0	0	0	0	0	0	0	0	0	1.161e-05	0	0	0	0	0	0	0	1.476e-05	0	0	0	0	0	1.585e-05	1.096e-05	0
CASSSNTDTQYF	0.00026505	10	3.066e-05	5.81e-06	6.7e-06	1.634e-05	0	0		0	0	0	0	1.904e-05	1.043e-05	0	0	0	0	0	0	0	0	0	0	0	0	0	0	0	0	0	1.161e-05	0	0	0	0	0	0	0	0	0	0	0	0	0	1.585e-05	0	0
CASSLGPSTDTQYF	0.00027762	8	3.066e-05	5.81e-06	6.7e-06	0	0	0		0	0	0	0	0	1.043e-05	0	0	0	0	0	0	0	0	0	0	0	0	0	0	0	0	0	1.161e-05	0	0	0	0	0	3.591e-05	0	0	3.976e-05	0	0	0	0	0	0	0
CASSSQGNYGYTF	0.00019446	7	1.022e-05	5.81e-06	6.7e-06	8.17e-06	0	0		0	0	0	0	0	0	0	0	0	0	0	0	0	0	0	0	0	0	0	0	0	0	0	0	0	0	0	0	0	0	0	0	0	0	0	0	0	1.585e-05	1.096e-05	0
CASSFGGGNQPQHF	0.00023004	6	0	1.163e-05	6.7e-06	0	0	0		0	0	0	0	3.808e-05	0	0	0	0	0	1.701e-05	0	0	0	0	0	0	0	0	0	0	0	0	0	0	0	0	0	0	0	0	0	1.988e-05	0	0	0	0	0	0	0
CSASRGQETQYF	0.00019542	5	1.022e-05	0	0	0	0	0		0	0	0	0	1.904e-05	0	0	0	0	0	0	0	0	0	0	0	0	0	0	0	0	0	0	0	0	0	0	0	0	1.796e-05	1.146e-05	0	0	0	0	0	0	0	0	0
CASSWGLNTEAFF	0.000178	5	0	1.163e-05	6.7e-06	8.17e-06	0	0		0	0	0	0	0	0	0	0	0	0	0	0	0	0	0	0	0	0	0	0	0	0	0	0	0	0	0	0	0	0	0	1.476e-05	0	0	0	0	0	0	0	0
CASSYGTSGYEQYF	0.00140812	4	0	0	0	0	0.000184239	0.000455317		0	0	0	0	0	0	0	0	0	0	0	0	0	0	0	0	0	0	0	0	0	0	0	0	0	0	0	0	0	0	0	0	0	0	0	0	0	0	0	0
CASSAGTGFYEQYF	0.00374609	4	0	0	6.7e-06	0	0	0		0	0	0	0	0	0	0	0	0	0	0	0	0	0	0	0	0	1.842e-05	0	0	0	0	0	0	0	0	0.00358423	0	0	0	0	0	0	0	0	0	0	0	0	0
CSVDRGSYNEQFF	0.0001477	2	0	0	0	0	0	0		0	0	0	0	0	0	0	0	0	0	0	0	0	0	0	0	0	0	0	0	0	0	0	0	0	0	0	0	0	0	0	0	0	0	0	0	0	0	1.096e-05	0
CASSWTVSNQPQHF	0.00014491	2	0	0	0	8.17e-06	0	0		0	0	0	0	0	0	0	0	0	0	0	0	0	0	0	0	0	0	0	0	0	0	0	0	0	0	0	0	0	0	0	0	0	0	0	0	0	0	0	0
CASSVGLAGGDEQFF	0.00015218	2	0	0	0	0	0	0		0	0	0	0	0	0	0	0	0	0	0	0	0	0	0	0	0	0	0	0	0	0	0	0	0	0	0	0	0	0	0	0	0	0	0	0	0	0	0	0
CASSSTRGYEQYF	0.00014256	2	0	5.81e-06	0	0	0	0		0	0	0	0	0	0	0	0	0	0	0	0	0	0	0	0	0	0	0	0	0	0	0	0	0	0	0	0	0	0	0	0	0	0	0	0	0	0	0	0
CASSRTSGGLDTQYF	0.0001547	2	0	0	0	0	0	0		0	0	0	0	0	0	0	0	0	0	0	0	0	0	0	0	0	0	0	0	0	0	0	0	0	0	0	0	0	1.796e-05	0	0	0	0	0	0	0	0	0	0
CASSLMSYEQYF	0.00015662	2	0	0	0	0	0	0		0	0	0	0	0	0	0	0	0	0	0	0	0	0	0	0	0	0	0	0	0	0	0	0	0	0	0	0	0	0	0	0	1.988e-05	0	0	0	0	0	0	0
CASSLGQANEQFF	0.00015014	2	0	0	1.339e-05	0	0	0		0	0	0	0	0	0	0	0	0	0	0	0	0	0	0	0	0	0	0	0	0	0	0	0	0	0	0	0	0	0	0	0	0	0	0	0	0	0	0	0
CASSGRAGNTIYF	0.0001486	2	0	0	0	0	0	0		0	0	0	0	0	0	0	0	0	0	0	0	0	0	0	0	0	0	0	0	0	0	0	0	0	0	0	0	0	0	0	0	0	0	0	0	0	0	0	0
RASSLRTGRLTHNEQFF	0.00013674	1	0	0	0	0	0	0		0	0	0	0	0	0	0	0	0	0	0	0	0	0	0	0	0	0	0	0	0	0	0	0	0	0	0	0	0	0	0	0	0	0	0	0	0	0	0	0
GAWSALAGARDTQYF	0.00013674	1	0	0	0	0	0	0		0	0	0	0	0	0	0	0	0	0	0	0	0	0	0	0	0	0	0	0	0	0	0	0	0	0	0	0	0	0	0	0	0	0	0	0	0	0	0	0
CTTRHEGSYEQYF	0.00013674	1	0	0	0	0	0	0		0	0	0	0	0	0	0	0	0	0	0	0	0	0	0	0	0	0	0	0	0	0	0	0	0	0	0	0	0	0	0	0	0	0	0	0	0	0	0	0
CTSSQTRTDRLNQPQHF	0.00013674	1	0	0	0	0	0	0		0	0	0	0	0	0	0	0	0	0	0	0	0	0	0	0	0	0	0	0	0	0	0	0	0	0	0	0	0	0	0	0	0	0	0	0	0	0	0	0
CSVVEATSYNEQFF	0.00013674	1	0	0	0	0	0	0		0	0	0	0	0	0	0	0	0	0	0	0	0	0	0	0	0	0	0	0	0	0	0	0	0	0	0	0	0	0	0	0	0	0	0	0	0	0	0	0
CSVEVVRPYGYTF	0.00013674	1	0	0	0	0	0	0		0	0	0	0	0	0	0	0	0	0	0	0	0	0	0	0	0	0	0	0	0	0	0	0	0	0	0	0	0	0	0	0	0	0	0	0	0	0	0	0
CSVEEGTSGAETQYF	0.00013674	1	0	0	0	0	0	0		0	0	0	0	0	0	0	0	0	0	0	0	0	0	0	0	0	0	0	0	0	0	0	0	0	0	0	0	0	0	0	0	0	0	0	0	0	0	0	0
CSVEDSGAGNYGYTF	0.00013674	1	0	0	0	0	0	0		0	0	0	0	0	0	0	0	0	0	0	0	0	0	0	0	0	0	0	0	0	0	0	0	0	0	0	0	0	0	0	0	0	0	0	0	0	0	0	0
CSATDNWRRFSSYNEQFF	0.00013674	1	0	0	0	0	0	0		0	0	0	0	0	0	0	0	0	0	0	0	0	0	0	0	0	0	0	0	0	0	0	0	0	0	0	0	0	0	0	0	0	0	0	0	0	0	0	0
CSARRGHYEQYF	0.00013674	1	0	0	0	0	0	0		0	0	0	0	0	0	0	0	0	0	0	0	0	0	0	0	0	0	0	0	0	0	0	0	0	0	0	0	0	0	0	0	0	0	0	0	0	0	0	0
CSARQGNEAFF	0.00013674	1	0	0	0	0	0	0		0	0	0	0	0	0	0	0	0	0	0	0	0	0	0	0	0	0	0	0	0	0	0	0	0	0	0	0	0	0	0	0	0	0	0	0	0	0	0	0
CSARGREGQASTDTQYF	0.00013674	1	0	0	0	0	0	0		0	0	0	0	0	0	0	0	0	0	0	0	0	0	0	0	0	0	0	0	0	0	0	0	0	0	0	0	0	0	0	0	0	0	0	0	0	0	0	0
CSAREGGVGFGYTF	0.00013674	1	0	0	0	0	0	0		0	0	0	0	0	0	0	0	0	0	0	0	0	0	0	0	0	0	0	0	0	0	0	0	0	0	0	0	0	0	0	0	0	0	0	0	0	0	0	0
CSARDPGQGADTQYF	0.00013674	1	0	0	0	0	0	0		0	0	0	0	0	0	0	0	0	0	0	0	0	0	0	0	0	0	0	0	0	0	0	0	0	0	0	0	0	0	0	0	0	0	0	0	0	0	0	0
CSARDMEQREAVEQYF	0.00013674	1	0	0	0	0	0	0		0	0	0	0	0	0	0	0	0	0	0	0	0	0	0	0	0	0	0	0	0	0	0	0	0	0	0	0	0	0	0	0	0	0	0	0	0	0	0	0
CSARDIDGNGYTF	0.00013674	1	0	0	0	0	0	0		0	0	0	0	0	0	0	0	0	0	0	0	0	0	0	0	0	0	0	0	0	0	0	0	0	0	0	0	0	0	0	0	0	0	0	0	0	0	0	0
CSAPGLSPSREQFF	0.00013674	1	0	0	0	0	0	0		0	0	0	0	0	0	0	0	0	0	0	0	0	0	0	0	0	0	0	0	0	0	0	0	0	0	0	0	0	0	0	0	0	0	0	0	0	0	0	0
CSANTDTQYF	0.00013674	1	0	0	0	0	0	0		0	0	0	0	0	0	0	0	0	0	0	0	0	0	0	0	0	0	0	0	0	0	0	0	0	0	0	0	0	0	0	0	0	0	0	0	0	0	0	0
CSALGRAGSKYNEQFF	0.00013674	1	0	0	0	0	0	0		0	0	0	0	0	0	0	0	0	0	0	0	0	0	0	0	0	0	0	0	0	0	0	0	0	0	0	0	0	0	0	0	0	0	0	0	0	0	0	0
CSAGLGTGGSFGYTF	0.00013674	1	0	0	0	0	0	0		0	0	0	0	0	0	0	0	0	0	0	0	0	0	0	0	0	0	0	0	0	0	0	0	0	0	0	0	0	0	0	0	0	0	0	0	0	0	0	0
CSAGGLAGSDNEQFF	0.00013674	1	0	0	0	0	0	0		0	0	0	0	0	0	0	0	0	0	0	0	0	0	0	0	0	0	0	0	0	0	0	0	0	0	0	0	0	0	0	0	0	0	0	0	0	0	0	0
CSAARDRGQETQYF	0.00013674	1	0	0	0	0	0	0		0	0	0	0	0	0	0	0	0	0	0	0	0	0	0	0	0	0	0	0	0	0	0	0	0	0	0	0	0	0	0	0	0	0	0	0	0	0	0	0
CAWSVLEQSSNTGELFF	0.00013674	1	0	0	0	0	0	0		0	0	0	0	0	0	0	0	0	0	0	0	0	0	0	0	0	0	0	0	0	0	0	0	0	0	0	0	0	0	0	0	0	0	0	0	0	0	0	0
CAWSSGFGNEQYF	0.00013674	1	0	0	0	0	0	0		0	0	0	0	0	0	0	0	0	0	0	0	0	0	0	0	0	0	0	0	0	0	0	0	0	0	0	0	0	0	0	0	0	0	0	0	0	0	0	0
CAWSNPFGGSGNTIYF	0.00013674	1	0	0	0	0	0	0		0	0	0	0	0	0	0	0	0	0	0	0	0	0	0	0	0	0	0	0	0	0	0	0	0	0	0	0	0	0	0	0	0	0	0	0	0	0	0	0
CAWLGLGQGNGYTF	0.00013674	1	0	0	0	0	0	0		0	0	0	0	0	0	0	0	0	0	0	0	0	0	0	0	0	0	0	0	0	0	0	0	0	0	0	0	0	0	0	0	0	0	0	0	0	0	0	0
CATTMTASGANVLTF	0.00013674	1	0	0	0	0	0	0		0	0	0	0	0	0	0	0	0	0	0	0	0	0	0	0	0	0	0	0	0	0	0	0	0	0	0	0	0	0	0	0	0	0	0	0	0	0	0	0
CATSRVGQNQETQYF	0.00013674	1	0	0	0	0	0	0		0	0	0	0	0	0	0	0	0	0	0	0	0	0	0	0	0	0	0	0	0	0	0	0	0	0	0	0	0	0	0	0	0	0	0	0	0	0	0	0
CATSKAWAGGQETQYF	0.00013674	1	0	0	0	0	0	0		0	0	0	0	0	0	0	0	0	0	0	0	0	0	0	0	0	0	0	0	0	0	0	0	0	0	0	0	0	0	0	0	0	0	0	0	0	0	0	0
CATGGTGGANEQFF	0.00013674	1	0	0	0	0	0	0		0	0	0	0	0	0	0	0	0	0	0	0	0	0	0	0	0	0	0	0	0	0	0	0	0	0	0	0	0	0	0	0	0	0	0	0	0	0	0	0
CASVPPRGGANEQFF	0.00013674	1	0	0	0	0	0	0		0	0	0	0	0	0	0	0	0	0	0	0	0	0	0	0	0	0	0	0	0	0	0	0	0	0	0	0	0	0	0	0	0	0	0	0	0	0	0	0
CASTKSPNRGYGYTF	0.00013674	1	0	0	0	0	0	0		0	0	0	0	0	0	0	0	0	0	0	0	0	0	0	0	0	0	0	0	0	0	0	0	0	0	0	0	0	0	0	0	0	0	0	0	0	0	0	0
CASSYTGGRPTDTQYF	0.00013674	1	0	0	0	0	0	0		0	0	0	0	0	0	0	0	0	0	0	0	0	0	0	0	0	0	0	0	0	0	0	0	0	0	0	0	0	0	0	0	0	0	0	0	0	0	0	0
CASSYSPWRGQFTDTQYF	0.00013674	1	0	0	0	0	0	0		0	0	0	0	0	0	0	0	0	0	0	0	0	0	0	0	0	0	0	0	0	0	0	0	0	0	0	0	0	0	0	0	0	0	0	0	0	0	0	0
CASSYLFGQGLAETQYF	0.00013674	1	0	0	0	0	0	0		0	0	0	0	0	0	0	0	0	0	0	0	0	0	0	0	0	0	0	0	0	0	0	0	0	0	0	0	0	0	0	0	0	0	0	0	0	0	0	0
CASSWSLSSGRGENEQFF	0.00013674	1	0	0	0	0	0	0		0	0	0	0	0	0	0	0	0	0	0	0	0	0	0	0	0	0	0	0	0	0	0	0	0	0	0	0	0	0	0	0	0	0	0	0	0	0	0	0
CASSWRGPDTQYF	0.00013674	1	0	0	0	0	0	0		0	0	0	0	0	0	0	0	0	0	0	0	0	0	0	0	0	0	0	0	0	0	0	0	0	0	0	0	0	0	0	0	0	0	0	0	0	0	0	0
CASSWGFAKNIQYF	0.00013674	1	0	0	0	0	0	0		0	0	0	0	0	0	0	0	0	0	0	0	0	0	0	0	0	0	0	0	0	0	0	0	0	0	0	0	0	0	0	0	0	0	0	0	0	0	0	0
CASSVGRGATTDTQYF	0.00013674	1	0	0	0	0	0	0		0	0	0	0	0	0	0	0	0	0	0	0	0	0	0	0	0	0	0	0	0	0	0	0	0	0	0	0	0	0	0	0	0	0	0	0	0	0	0	0
CASSTRDSSGNTIYF	0.00013674	1	0	0	0	0	0	0		0	0	0	0	0	0	0	0	0	0	0	0	0	0	0	0	0	0	0	0	0	0	0	0	0	0	0	0	0	0	0	0	0	0	0	0	0	0	0	0
CASSSQAGSLSYGYTF	0.00013674	1	0	0	0	0	0	0		0	0	0	0	0	0	0	0	0	0	0	0	0	0	0	0	0	0	0	0	0	0	0	0	0	0	0	0	0	0	0	0	0	0	0	0	0	0	0	0
CASSSPGTNYEQYF	0.00013674	1	0	0	0	0	0	0		0	0	0	0	0	0	0	0	0	0	0	0	0	0	0	0	0	0	0	0	0	0	0	0	0	0	0	0	0	0	0	0	0	0	0	0	0	0	0	0
CASSSPAEYGYTF	0.00013674	1	0	0	0	0	0	0		0	0	0	0	0	0	0	0	0	0	0	0	0	0	0	0	0	0	0	0	0	0	0	0	0	0	0	0	0	0	0	0	0	0	0	0	0	0	0	0
CASSSHRGADTQYF	0.00013674	1	0	0	0	0	0	0		0	0	0	0	0	0	0	0	0	0	0	0	0	0	0	0	0	0	0	0	0	0	0	0	0	0	0	0	0	0	0	0	0	0	0	0	0	0	0	0
CASSSESDNEQFF	0.00013674	1	0	0	0	0	0	0		0	0	0	0	0	0	0	0	0	0	0	0	0	0	0	0	0	0	0	0	0	0	0	0	0	0	0	0	0	0	0	0	0	0	0	0	0	0	0	0
CASSSARDRLLYQYF	0.00013674	1	0	0	0	0	0	0		0	0	0	0	0	0	0	0	0	0	0	0	0	0	0	0	0	0	0	0	0	0	0	0	0	0	0	0	0	0	0	0	0	0	0	0	0	0	0	0
CASSSAPRGSEQFF	0.00013674	1	0	0	0	0	0	0		0	0	0	0	0	0	0	0	0	0	0	0	0	0	0	0	0	0	0	0	0	0	0	0	0	0	0	0	0	0	0	0	0	0	0	0	0	0	0	0
CASSSAPGHSGANVLTF	0.00013674	1	0	0	0	0	0	0		0	0	0	0	0	0	0	0	0	0	0	0	0	0	0	0	0	0	0	0	0	0	0	0	0	0	0	0	0	0	0	0	0	0	0	0	0	0	0	0
CASSRTSGNEKLFF	0.00013674	1	0	0	0	0	0	0		0	0	0	0	0	0	0	0	0	0	0	0	0	0	0	0	0	0	0	0	0	0	0	0	0	0	0	0	0	0	0	0	0	0	0	0	0	0	0	0
CASSRLGGDTDTQYF	0.00013674	1	0	0	0	0	0	0		0	0	0	0	0	0	0	0	0	0	0	0	0	0	0	0	0	0	0	0	0	0	0	0	0	0	0	0	0	0	0	0	0	0	0	0	0	0	0	0
CASSRLGAGGLNEQFF	0.00013674	1	0	0	0	0	0	0		0	0	0	0	0	0	0	0	0	0	0	0	0	0	0	0	0	0	0	0	0	0	0	0	0	0	0	0	0	0	0	0	0	0	0	0	0	0	0	0
CASSRGRPSYEQYF	0.00013674	1	0	0	0	0	0	0		0	0	0	0	0	0	0	0	0	0	0	0	0	0	0	0	0	0	0	0	0	0	0	0	0	0	0	0	0	0	0	0	0	0	0	0	0	0	0	0
CASSRGQGAGLTEAFF	0.00013674	1	0	0	0	0	0	0		0	0	0	0	0	0	0	0	0	0	0	0	0	0	0	0	0	0	0	0	0	0	0	0	0	0	0	0	0	0	0	0	0	0	0	0	0	0	0	0
CASSRGGLGGEQFF	0.00013674	1	0	0	0	0	0	0		0	0	0	0	0	0	0	0	0	0	0	0	0	0	0	0	0	0	0	0	0	0	0	0	0	0	0	0	0	0	0	0	0	0	0	0	0	0	0	0
CASSQYLGADYGYTF	0.00013674	1	0	0	0	0	0	0		0	0	0	0	0	0	0	0	0	0	0	0	0	0	0	0	0	0	0	0	0	0	0	0	0	0	0	0	0	0	0	0	0	0	0	0	0	0	0	0
CASSQVKYGKAPNQPQHF	0.00013674	1	0	0	0	0	0	0		0	0	0	0	0	0	0	0	0	0	0	0	0	0	0	0	0	0	0	0	0	0	0	0	0	0	0	0	0	0	0	0	0	0	0	0	0	0	0	0
CASSQRRKGGQFF	0.00013674	1	0	0	0	0	0	0		0	0	0	0	0	0	0	0	0	0	0	0	0	0	0	0	0	0	0	0	0	0	0	0	0	0	0	0	0	0	0	0	0	0	0	0	0	0	0	0
CASSQMAPGTGELFF	0.00013674	1	0	0	0	0	0	0		0	0	0	0	0	0	0	0	0	0	0	0	0	0	0	0	0	0	0	0	0	0	0	0	0	0	0	0	0	0	0	0	0	0	0	0	0	0	0	0
CASSQKGTPTYNEQFF	0.00013674	1	0	0	0	0	0	0		0	0	0	0	0	0	0	0	0	0	0	0	0	0	0	0	0	0	0	0	0	0	0	0	0	0	0	0	0	0	0	0	0	0	0	0	0	0	0	0
CASSQGPDYEQYF	0.00013674	1	0	0	0	0	0	0		0	0	0	0	0	0	0	0	0	0	0	0	0	0	0	0	0	0	0	0	0	0	0	0	0	0	0	0	0	0	0	0	0	0	0	0	0	0	0	0
CASSQGGARGGTGELFF	0.00013674	1	0	0	0	0	0	0		0	0	0	0	0	0	0	0	0	0	0	0	0	0	0	0	0	0	0	0	0	0	0	0	0	0	0	0	0	0	0	0	0	0	0	0	0	0	0	0
CASSQEDEQYF	0.00013674	1	0	0	0	0	0	0		0	0	0	0	0	0	0	0	0	0	0	0	0	0	0	0	0	0	0	0	0	0	0	0	0	0	0	0	0	0	0	0	0	0	0	0	0	0	0	0
CASSQDWAGDSYEQYF	0.00013674	1	0	0	0	0	0	0		0	0	0	0	0	0	0	0	0	0	0	0	0	0	0	0	0	0	0	0	0	0	0	0	0	0	0	0	0	0	0	0	0	0	0	0	0	0	0	0
CASSQDRTGAHYNEQFF	0.00013674	1	0	0	0	0	0	0		0	0	0	0	0	0	0	0	0	0	0	0	0	0	0	0	0	0	0	0	0	0	0	0	0	0	0	0	0	0	0	0	0	0	0	0	0	0	0	0
CASSQDLREGGEQYF	0.00013674	1	0	0	0	0	0	0		0	0	0	0	0	0	0	0	0	0	0	0	0	0	0	0	0	0	0	0	0	0	0	0	0	0	0	0	0	0	0	0	0	0	0	0	0	0	0	0
CASSPWTSGGALNIQYF	0.00013674	1	0	0	0	0	0	0		0	0	0	0	0	0	0	0	0	0	0	0	0	0	0	0	0	0	0	0	0	0	0	0	0	0	0	0	0	0	0	0	0	0	0	0	0	0	0	0
CASSPVSDSLGTEAFF	0.00013674	1	0	0	0	0	0	0		0	0	0	0	0	0	0	0	0	0	0	0	0	0	0	0	0	0	0	0	0	0	0	0	0	0	0	0	0	0	0	0	0	0	0	0	0	0	0	0
CASSPSLAGANYEQFF	0.00013674	1	0	0	0	0	0	0		0	0	0	0	0	0	0	0	0	0	0	0	0	0	0	0	0	0	0	0	0	0	0	0	0	0	0	0	0	0	0	0	0	0	0	0	0	0	0	0
CASSPRTSGGAYTQYF	0.00013674	1	0	0	0	0	0	0		0	0	0	0	0	0	0	0	0	0	0	0	0	0	0	0	0	0	0	0	0	0	0	0	0	0	0	0	0	0	0	0	0	0	0	0	0	0	0	0
CASSPRTSGERYYEQYF	0.00013674	1	0	0	0	0	0	0		0	0	0	0	0	0	0	0	0	0	0	0	0	0	0	0	0	0	0	0	0	0	0	0	0	0	0	0	0	0	0	0	0	0	0	0	0	0	0	0
CASSPRTGGREQYF	0.00013674	1	0	0	0	0	0	0		0	0	0	0	0	0	0	0	0	0	0	0	0	0	0	0	0	0	0	0	0	0	0	0	0	0	0	0	0	0	0	0	0	0	0	0	0	0	0	0
CASSPRNGAESPLHF	0.00013674	1	0	0	0	0	0	0		0	0	0	0	0	0	0	0	0	0	0	0	0	0	0	0	0	0	0	0	0	0	0	0	0	0	0	0	0	0	0	0	0	0	0	0	0	0	0	0
CASSPQGADYGYTF	0.00013674	1	0	0	0	0	0	0		0	0	0	0	0	0	0	0	0	0	0	0	0	0	0	0	0	0	0	0	0	0	0	0	0	0	0	0	0	0	0	0	0	0	0	0	0	0	0	0
CASSPLHYSTSNEKLFF	0.00013674	1	0	0	0	0	0	0		0	0	0	0	0	0	0	0	0	0	0	0	0	0	0	0	0	0	0	0	0	0	0	0	0	0	0	0	0	0	0	0	0	0	0	0	0	0	0	0
CASSPEPNTEAFF	0.00013674	1	0	0	0	0	0	0		0	0	0	0	0	0	0	0	0	0	0	0	0	0	0	0	0	0	0	0	0	0	0	0	0	0	0	0	0	0	0	0	0	0	0	0	0	0	0	0
CASSMGGGTSTDTQYF	0.00013674	1	0	0	0	0	0	0		0	0	0	0	0	0	0	0	0	0	0	0	0	0	0	0	0	0	0	0	0	0	0	0	0	0	0	0	0	0	0	0	0	0	0	0	0	0	0	0
CASSLWGSPATNEKLFF	0.00013674	1	0	0	0	0	0	0		0	0	0	0	0	0	0	0	0	0	0	0	0	0	0	0	0	0	0	0	0	0	0	0	0	0	0	0	0	0	0	0	0	0	0	0	0	0	0	0
CASSLVGQGFYNEQFF	0.00013674	1	0	0	0	0	0	0		0	0	0	0	0	0	0	0	0	0	0	0	0	0	0	0	0	0	0	0	0	0	0	0	0	0	0	0	0	0	0	0	0	0	0	0	0	0	0	0
CASSLTGTETYEQYF	0.00013674	1	0	0	0	0	0	0		0	0	0	0	0	0	0	0	0	0	0	0	0	0	0	0	0	0	0	0	0	0	0	0	0	0	0	0	0	0	0	0	0	0	0	0	0	0	0	0
CASSLTGDHEQYF	0.00013674	1	0	0	0	0	0	0		0	0	0	0	0	0	0	0	0	0	0	0	0	0	0	0	0	0	0	0	0	0	0	0	0	0	0	0	0	0	0	0	0	0	0	0	0	0	0	0
CASSLSRAGLTNEKLFF	0.00013674	1	0	0	0	0	0	0		0	0	0	0	0	0	0	0	0	0	0	0	0	0	0	0	0	0	0	0	0	0	0	0	0	0	0	0	0	0	0	0	0	0	0	0	0	0	0	0
CASSLNPFRQGQFF	0.00013674	1	0	0	0	0	0	0		0	0	0	0	0	0	0	0	0	0	0	0	0	0	0	0	0	0	0	0	0	0	0	0	0	0	0	0	0	0	0	0	0	0	0	0	0	0	0	0
CASSLNAGSAKNIQYF	0.00013674	1	0	0	0	0	0	0		0	0	0	0	0	0	0	0	0	0	0	0	0	0	0	0	0	0	0	0	0	0	0	0	0	0	0	0	0	0	0	0	0	0	0	0	0	0	0	0
CASSLLAGPYEQFF	0.00013674	1	0	0	0	0	0	0		0	0	0	0	0	0	0	0	0	0	0	0	0	0	0	0	0	0	0	0	0	0	0	0	0	0	0	0	0	0	0	0	0	0	0	0	0	0	0	0
CASSLGSGANQPQHF	0.00013674	1	0	0	0	0	0	0		0	0	0	0	0	0	0	0	0	0	0	0	0	0	0	0	0	0	0	0	0	0	0	0	0	0	0	0	0	0	0	0	0	0	0	0	0	0	0	0
CASSLGGADEKLFF	0.00013674	1	0	0	0	0	0	0		0	0	0	0	0	0	0	0	0	0	0	0	0	0	0	0	0	0	0	0	0	0	0	0	0	0	0	0	0	0	0	0	0	0	0	0	0	0	0	0
CASSLGFRLANQETQYF	0.00013674	1	0	0	0	0	0	0		0	0	0	0	0	0	0	0	0	0	0	0	0	0	0	0	0	0	0	0	0	0	0	0	0	0	0	0	0	0	0	0	0	0	0	0	0	0	0	0
CASSLGDDRPQHF	0.00013674	1	0	0	0	0	0	0		0	0	0	0	0	0	0	0	0	0	0	0	0	0	0	0	0	0	0	0	0	0	0	0	0	0	0	0	0	0	0	0	0	0	0	0	0	0	0	0
CASSLETANTEAFF	0.00013674	1	0	0	0	0	0	0		0	0	0	0	0	0	0	0	0	0	0	0	0	0	0	0	0	0	0	0	0	0	0	0	0	0	0	0	0	0	0	0	0	0	0	0	0	0	0	0
CASSLEGSSTNEKLFF	0.00013674	1	0	0	0	0	0	0		0	0	0	0	0	0	0	0	0	0	0	0	0	0	0	0	0	0	0	0	0	0	0	0	0	0	0	0	0	0	0	0	0	0	0	0	0	0	0	0
CASSLEEPLGNQPQHF	0.00013674	1	0	0	0	0	0	0		0	0	0	0	0	0	0	0	0	0	0	0	0	0	0	0	0	0	0	0	0	0	0	0	0	0	0	0	0	0	0	0	0	0	0	0	0	0	0	0
CASSLDSEYEQYF	0.00013674	1	0	0	0	0	0	0		0	0	0	0	0	0	0	0	0	0	0	0	0	0	0	0	0	0	0	0	0	0	0	0	0	0	0	0	0	0	0	0	0	0	0	0	0	0	0	0
CASSLDGGGRKNIQYF	0.00013674	1	0	0	0	0	0	0		0	0	0	0	0	0	0	0	0	0	0	0	0	0	0	0	0	0	0	0	0	0	0	0	0	0	0	0	0	0	0	0	0	0	0	0	0	0	0	0
CASSKTGSGEQYF	0.00013674	1	0	0	0	0	0	0		0	0	0	0	0	0	0	0	0	0	0	0	0	0	0	0	0	0	0	0	0	0	0	0	0	0	0	0	0	0	0	0	0	0	0	0	0	0	0	0
CASSKLQDLNYGYTF	0.00013674	1	0	0	0	0	0	0		0	0	0	0	0	0	0	0	0	0	0	0	0	0	0	0	0	0	0	0	0	0	0	0	0	0	0	0	0	0	0	0	0	0	0	0	0	0	0	0
CASSIGLALHTDTQYF	0.00013674	1	0	0	0	0	0	0		0	0	0	0	0	0	0	0	0	0	0	0	0	0	0	0	0	0	0	0	0	0	0	0	0	0	0	0	0	0	0	0	0	0	0	0	0	0	0	0
CASSHLGGPYGYTF	0.00013674	1	0	0	0	0	0	0		0	0	0	0	0	0	0	0	0	0	0	0	0	0	0	0	0	0	0	0	0	0	0	0	0	0	0	0	0	0	0	0	0	0	0	0	0	0	0	0
CASSGTENYEQYF	0.00013674	1	0	0	0	0	0	0		0	0	0	0	0	0	0	0	0	0	0	0	0	0	0	0	0	0	0	0	0	0	0	0	0	0	0	0	0	0	0	0	0	0	0	0	0	0	0	0
CASSGPQGPCTDTQYF	0.00013674	1	0	0	0	0	0	0		0	0	0	0	0	0	0	0	0	0	0	0	0	0	0	0	0	0	0	0	0	0	0	0	0	0	0	0	0	0	0	0	0	0	0	0	0	0	0	0
CASSFTRDGQYNEQFF	0.00013674	1	0	0	0	0	0	0		0	0	0	0	0	0	0	0	0	0	0	0	0	0	0	0	0	0	0	0	0	0	0	0	0	0	0	0	0	0	0	0	0	0	0	0	0	0	0	0
CASSFTPPTFYEQYF	0.00013674	1	0	0	0	0	0	0		0	0	0	0	0	0	0	0	0	0	0	0	0	0	0	0	0	0	0	0	0	0	0	0	0	0	0	0	0	0	0	0	0	0	0	0	0	0	0	0
CASSFRGVGETQYF	0.00013674	1	0	0	0	0	0	0		0	0	0	0	0	0	0	0	0	0	0	0	0	0	0	0	0	0	0	0	0	0	0	0	0	0	0	0	0	0	0	0	0	0	0	0	0	0	0	0
CASSFRESEIF	0.00013674	1	0	0	0	0	0	0		0	0	0	0	0	0	0	0	0	0	0	0	0	0	0	0	0	0	0	0	0	0	0	0	0	0	0	0	0	0	0	0	0	0	0	0	0	0	0	0
CASSEGGGSDEQYF	0.00013674	1	0	0	0	0	0	0		0	0	0	0	0	0	0	0	0	0	0	0	0	0	0	0	0	0	0	0	0	0	0	0	0	0	0	0	0	0	0	0	0	0	0	0	0	0	0	0
CASSEERTGVFFPGNTIYF	0.00013674	1	0	0	0	0	0	0		0	0	0	0	0	0	0	0	0	0	0	0	0	0	0	0	0	0	0	0	0	0	0	0	0	0	0	0	0	0	0	0	0	0	0	0	0	0	0	0
CASSEAKGSDQPQHF	0.00013674	1	0	0	0	0	0	0		0	0	0	0	0	0	0	0	0	0	0	0	0	0	0	0	0	0	0	0	0	0	0	0	0	0	0	0	0	0	0	0	0	0	0	0	0	0	0	0
CASSDGQPYYGYTF	0.00013674	1	0	0	0	0	0	0		0	0	0	0	0	0	0	0	0	0	0	0	0	0	0	0	0	0	0	0	0	0	0	0	0	0	0	0	0	0	0	0	0	0	0	0	0	0	0	0
CASSAWDIVYNEQFF	0.00013674	1	0	0	0	0	0	0		0	0	0	0	0	0	0	0	0	0	0	0	0	0	0	0	0	0	0	0	0	0	0	0	0	0	0	0	0	0	0	0	0	0	0	0	0	0	0	0
CASSANDRAGNTIYF	0.00013674	1	0	0	0	0	0	0		0	0	0	0	0	0	0	0	0	0	0	0	0	0	0	0	0	0	0	0	0	0	0	0	0	0	0	0	0	0	0	0	0	0	0	0	0	0	0	0
CASSAGTYNTGELFF	0.00013674	1	0	0	0	0	0	0		0	0	0	0	0	0	0	0	0	0	0	0	0	0	0	0	0	0	0	0	0	0	0	0	0	0	0	0	0	0	0	0	0	0	0	0	0	0	0	0
CASSAGGEAFF	0.00013674	1	0	0	0	0	0	0		0	0	0	0	0	0	0	0	0	0	0	0	0	0	0	0	0	0	0	0	0	0	0	0	0	0	0	0	0	0	0	0	0	0	0	0	0	0	0	0
CASRTRTTGTPEKLFF	0.00013674	1	0	0	0	0	0	0		0	0	0	0	0	0	0	0	0	0	0	0	0	0	0	0	0	0	0	0	0	0	0	0	0	0	0	0	0	0	0	0	0	0	0	0	0	0	0	0
CASRTLQTSTDTQYF	0.00013674	1	0	0	0	0	0	0		0	0	0	0	0	0	0	0	0	0	0	0	0	0	0	0	0	0	0	0	0	0	0	0	0	0	0	0	0	0	0	0	0	0	0	0	0	0	0	0
CASRNLAGGPHTQYF	0.00013674	1	0	0	0	0	0	0		0	0	0	0	0	0	0	0	0	0	0	0	0	0	0	0	0	0	0	0	0	0	0	0	0	0	0	0	0	0	0	0	0	0	0	0	0	0	0	0
CASRLGRLAQYF	0.00013674	1	0	0	0	0	0	0		0	0	0	0	0	0	0	0	0	0	0	0	0	0	0	0	0	0	0	0	0	0	0	0	0	0	0	0	0	0	0	0	0	0	0	0	0	0	0	0
CASRGAEAALREQYF	0.00013674	1	0	0	0	0	0	0		0	0	0	0	0	0	0	0	0	0	0	0	0	0	0	0	0	0	0	0	0	0	0	0	0	0	0	0	0	0	0	0	0	0	0	0	0	0	0	0
CASRDRLSGGANVLTF	0.00013674	1	0	0	0	0	0	0		0	0	0	0	0	0	0	0	0	0	0	0	0	0	0	0	0	0	0	0	0	0	0	0	0	0	0	0	0	0	0	0	0	0	0	0	0	0	0	0
CASLGLNTGELFF	0.00013674	1	0	0	0	0	0	0		0	0	0	0	0	0	0	0	0	0	0	0	0	0	0	0	0	0	0	0	0	0	0	0	0	0	0	0	0	0	0	0	0	0	0	0	0	0	0	0
CASKDNYNEQFF	0.00013674	1	0	0	0	0	0	0		0	0	0	0	0	0	0	0	0	0	0	0	0	0	0	0	0	0	0	0	0	0	0	0	0	0	0	0	0	0	0	0	0	0	0	0	0	0	0	0
CASGSTGTTEAFF	0.00013674	1	0	0	0	0	0	0		0	0	0	0	0	0	0	0	0	0	0	0	0	0	0	0	0	0	0	0	0	0	0	0	0	0	0	0	0	0	0	0	0	0	0	0	0	0	0	0
CASAGVNSQPQHF	0.00013674	1	0	0	0	0	0	0		0	0	0	0	0	0	0	0	0	0	0	0	0	0	0	0	0	0	0	0	0	0	0	0	0	0	0	0	0	0	0	0	0	0	0	0	0	0	0	0
CAISGAGNTVVDEQYF	0.00013674	1	0	0	0	0	0	0		0	0	0	0	0	0	0	0	0	0	0	0	0	0	0	0	0	0	0	0	0	0	0	0	0	0	0	0	0	0	0	0	0	0	0	0	0	0	0	0
CAISESGRRINTEAFF	0.00013674	1	0	0	0	0	0	0		0	0	0	0	0	0	0	0	0	0	0	0	0	0	0	0	0	0	0	0	0	0	0	0	0	0	0	0	0	0	0	0	0	0	0	0	0	0	0	0
CAISEAKLTQETQYF	0.00013674	1	0	0	0	0	0	0		0	0	0	0	0	0	0	0	0	0	0	0	0	0	0	0	0	0	0	0	0	0	0	0	0	0	0	0	0	0	0	0	0	0	0	0	0	0	0	0
CAIRGGPRLAKNIQYF	0.00013674	1	0	0	0	0	0	0		0	0	0	0	0	0	0	0	0	0	0	0	0	0	0	0	0	0	0	0	0	0	0	0	0	0	0	0	0	0	0	0	0	0	0	0	0	0	0	0
CAIRDDAGRNTEAFF	0.00013674	1	0	0	0	0	0	0		0	0	0	0	0	0	0	0	0	0	0	0	0	0	0	0	0	0	0	0	0	0	0	0	0	0	0	0	0	0	0	0	0	0	0	0	0	0	0	0
CSANRGGNQPQHF	0.0171309	2	0	0	0	8.17e-06	0	0		0	0	0	0	0	0	0	0	0	0	0	0	0	0	0	0	0	0	0	0	0	0	0	0	0	0	0	0	0	0	0	0	0	0	0	0	0	0	0	0
CASSLDQGTEAFF	0.00335636	5	0	0	0	0	0	0		0	0	0	0	0	0	0	0	0	0	0	0	0	0	0	0	0	0	0	0	0	0	0	0	0	0	0	0	0	0	0	1.476e-05	0	0	0	0	0	0	0	0
CSVSEAFF	0.00083935	1	0	0	0	0	0	0		0	0	0	0	0	0	0	0	0	0	0	0	0	0	0	0	0	0	0	0	0	0	0	0	0	0	0	0	0	0	0	0	0	0	0	0	0	0	0	0
CASSSGVRDTEAFF	0.00067148	1	0	0	0	0	0	0		0	0	0	0	0	0	0	0	0	0	0	0	0	0	0	0	0	0	0	0	0	0	0	0	0	0	0	0	0	0	0	0	0	0	0	0	0	0	0	0
CASSLLSGEQYF	0.0005295	2	0	0	0	0	0	0		0	0	0	0	0	0	0	0	0	0	0	0	0	0	0	0	0	0	0	0	0	0	0	0	0	0	0	0	0	0	0	0	0	0	0	0	0	0	0	0
CAWSLWREAFF	0.00050361	1	0	0	0	0	0	0		0	0	0	0	0	0	0	0	0	0	0	0	0	0	0	0	0	0	0	0	0	0	0	0	0	0	0	0	0	0	0	0	0	0	0	0	0	0	0	0
CAVGGNTGELFF	0.00050361	1	0	0	0	0	0	0		0	0	0	0	0	0	0	0	0	0	0	0	0	0	0	0	0	0	0	0	0	0	0	0	0	0	0	0	0	0	0	0	0	0	0	0	0	0	0	0
CASTLDSGNTEAFF	0.00050361	1	0	0	0	0	0	0		0	0	0	0	0	0	0	0	0	0	0	0	0	0	0	0	0	0	0	0	0	0	0	0	0	0	0	0	0	0	0	0	0	0	0	0	0	0	0	0
CASSSPIGELFF	0.00050361	1	0	0	0	0	0	0		0	0	0	0	0	0	0	0	0	0	0	0	0	0	0	0	0	0	0	0	0	0	0	0	0	0	0	0	0	0	0	0	0	0	0	0	0	0	0	0
CASSSETRFAGELFF	0.00050361	1	0	0	0	0	0	0		0	0	0	0	0	0	0	0	0	0	0	0	0	0	0	0	0	0	0	0	0	0	0	0	0	0	0	0	0	0	0	0	0	0	0	0	0	0	0	0
CASSIWDRGNEAFF	0.00327975	6	0	0	0	0	0	0		0	0	0	0	0	0	0	0	0	0	0	0	0	0	0	0	0	0	0	0	0	0	0	0	0	0	0	0	0	0	0	0	0	0	0	0	0	0	0	0
CASSLDRFPGELFF	0.00200745	3	0	0	0	0	0	0		0	0	0	0	0	0	0	0	0	0	0	0	0	0	0	0	0	0	0	0	0	0	0	0	0	0	0	0	0	0	0	0	0	0	0	0	0	0	0	0
CSASPRLASSDIQYF	0.0011832	2	0	0	0	0	0	0		0	0	0	0	0	0	0	0	0	0	0	0	0	0	0	0	0	0	0	0	0	0	0	0	0	0	0	0	0	0	0	0	0	0	0	0	0	0	0	0
CAISESVPNYGYTF	0.00119502	4	0	0	0	0	0	0		0	0	0	0	0	0	0	0	0	0	0	0	0	0	0	0	0	0	0	0	0	0	0	0	0	0	0	0	0	0	0	0	0	0	0	0	0	0	0	0
CASSPGHSGNTIYF	0.00161346	21	4.088e-05	2.326e-05	2.679e-05	5.72e-05	1.22826e-05	1.12424e-05		0	0	0	0	3.808e-05	2.085e-05	0	0	0	0	0	0	0	0	0	0	0	7.368e-05	0	0	0	0	7.523e-05	3.483e-05	0	0	0	0	0	8.978e-05	2.292e-05	2.951e-05	0	0	0	0	0	1.585e-05	3.288e-05	0
CASSFLPTEAFF	0.00060283	2	0	0	0	0	0	0		0	0	0	0	0	0	0	0	0	0	0	0	0	0	0	0	0	0	0	0	0	0	0	0	0	0	0	0	0	0	0	0	0	0	0	0	0	0	0	0
CASSLGQGYGYTF	0.00053151	13	2.044e-05	2.326e-05	6.7e-06	1.634e-05	0	1.68636e-05		0	0	0	0	1.904e-05	0	0	0	0	0	0	0	0	0	0	0	0	0	0	0	0	0	0	2.322e-05	0	0	0	0	0	1.796e-05	0	1.476e-05	0	0	0	0	0	0	1.096e-05	0
CASSLAGSQETQYF	0.00046799	10	0	5.81e-06	6.7e-06	8.17e-06	0	1.68636e-05		0	0	0	0	0	0	0	0	0	0	1.701e-05	0	0	0	0	0	1.704e-05	0	0	0	0	0	0	0	0	0	0	0	0	0	2.292e-05	1.476e-05	1.988e-05	0	0	0	0	0	0	0
CASSVTENTEAFF	0.00037077	4	1.022e-05	0	0	0	0	0		0	0	0	0	0	0	0	0	0	0	0	0	0	0	0	0	0	0	0	0	0	0	0	1.161e-05	0	0	0	0	0	0	0	0	0	0	0	0	0	0	0	0
CASSFSGGTYEQYF	0.00038388	4	1.022e-05	0	0	0	0	0		0	0	0	0	0	0	0	0	0	0	0	0	0	0	0	0	0	0	0	0	0	0	0	0	0	0	0	0	0	1.796e-05	0	0	0	0	0	0	0	0	0	0
CASSVGLAETQYF	0.00039263	3	0	0	0	0	0	0		0	0	0	0	3.808e-05	0	0	0	0	0	0	0	0	0	0	0	0	0	0	0	0	0	1.881e-05	0	0	0	0	0	0	0	0	0	0	0	0	0	0	0	0	0
CASSPGQSGNTIYF	0.00035838	3	0	0	6.7e-06	0	0	0		0	0	0	0	0	0	0	0	0	0	0	0	0	0	0	0	0	0	0	0	0	0	0	0	0	0	0	0	0	0	0	0	0	0	0	0	0	0	0	0
CASSLRLGEKLFF	0.00037205	3	0	0	0	1.634e-05	0	0		0	0	0	0	0	0	0	0	0	0	0	0	0	0	0	0	0	0	0	0	0	0	0	0	0	0	0	0	0	0	0	0	0	0	0	0	0	0	0	0
CASSYPTGSYEQYF	0.00035455	2	0	0	0	0	0	0		0	0	0	0	0	0	0	0	0	0	0	0	0	0	0	0	0	0	0	0	0	0	1.881e-05	0	0	0	0	0	0	0	0	0	0	0	0	0	0	0	0	0
CASSVRNTEAFF	0.00035866	2	0	0	0	0	0	0		0	0	0	0	0	0	0	0	0	0	0	0	0	0	0	0	0	0	0	0	0	0	0	0	0	0	0	0	0	0	2.292e-05	0	0	0	0	0	0	0	0	0
CASSPLGTANQPQHF	0.00035659	2	0	0	0	0	0	0		0	0	0	0	0	2.085e-05	0	0	0	0	0	0	0	0	0	0	0	0	0	0	0	0	0	0	0	0	0	0	0	0	0	0	0	0	0	0	0	0	0	0
CASSPGTPNTGELFF	0.00035208	2	0	0	0	1.634e-05	0	0		0	0	0	0	0	0	0	0	0	0	0	0	0	0	0	0	0	0	0	0	0	0	0	0	0	0	0	0	0	0	0	0	0	0	0	0	0	0	0	0
CASSLTPGRPNTEAFF	0.00035278	2	0	0	0	0	0	0		0	0	0	0	0	0	0	0	0	0	0	0	0	0	0	0	1.704e-05	0	0	0	0	0	0	0	0	0	0	0	0	0	0	0	0	0	0	0	0	0	0	0
CASSESIDTQYF	0.0003476	2	0	0	0	0	0	0		0	0	0	0	0	0	0	0	0	0	0	0	0	0	0	0	0	0	0	0	0	0	0	0	0	0	0	0	0	0	0	0	0	0	0	0	0	0	0	0
CASSEPGQGRSYEQYF	0.0003467	2	0	0	0	0	0	0		0	0	0	0	0	0	0	0	0	0	0	0	0	0	0	0	0	0	0	0	0	0	0	0	0	0	0	0	0	0	0	0	0	0	0	0	0	0	1.096e-05	0
CSVTGTGDTGELFF	0.00033574	1	0	0	0	0	0	0		0	0	0	0	0	0	0	0	0	0	0	0	0	0	0	0	0	0	0	0	0	0	0	0	0	0	0	0	0	0	0	0	0	0	0	0	0	0	0	0
CSVKTALLPEAFF	0.00033574	1	0	0	0	0	0	0		0	0	0	0	0	0	0	0	0	0	0	0	0	0	0	0	0	0	0	0	0	0	0	0	0	0	0	0	0	0	0	0	0	0	0	0	0	0	0	0
CSASRENVETQYF	0.00033574	1	0	0	0	0	0	0		0	0	0	0	0	0	0	0	0	0	0	0	0	0	0	0	0	0	0	0	0	0	0	0	0	0	0	0	0	0	0	0	0	0	0	0	0	0	0	0
CSASREEAFF	0.00033574	1	0	0	0	0	0	0		0	0	0	0	0	0	0	0	0	0	0	0	0	0	0	0	0	0	0	0	0	0	0	0	0	0	0	0	0	0	0	0	0	0	0	0	0	0	0	0
CSARPTGANSYEQYF	0.00033574	1	0	0	0	0	0	0		0	0	0	0	0	0	0	0	0	0	0	0	0	0	0	0	0	0	0	0	0	0	0	0	0	0	0	0	0	0	0	0	0	0	0	0	0	0	0	0
CSAPDGRNTEAFF	0.00033574	1	0	0	0	0	0	0		0	0	0	0	0	0	0	0	0	0	0	0	0	0	0	0	0	0	0	0	0	0	0	0	0	0	0	0	0	0	0	0	0	0	0	0	0	0	0	0
CAWTRRPWDTEAFF	0.00033574	1	0	0	0	0	0	0		0	0	0	0	0	0	0	0	0	0	0	0	0	0	0	0	0	0	0	0	0	0	0	0	0	0	0	0	0	0	0	0	0	0	0	0	0	0	0	0
CAWSFGSGNTIYF	0.00033574	1	0	0	0	0	0	0		0	0	0	0	0	0	0	0	0	0	0	0	0	0	0	0	0	0	0	0	0	0	0	0	0	0	0	0	0	0	0	0	0	0	0	0	0	0	0	0
CATLRAGSYEQYF	0.00033574	1	0	0	0	0	0	0		0	0	0	0	0	0	0	0	0	0	0	0	0	0	0	0	0	0	0	0	0	0	0	0	0	0	0	0	0	0	0	0	0	0	0	0	0	0	0	0
CATKTGKDGYTF	0.00033574	1	0	0	0	0	0	0		0	0	0	0	0	0	0	0	0	0	0	0	0	0	0	0	0	0	0	0	0	0	0	0	0	0	0	0	0	0	0	0	0	0	0	0	0	0	0	0
CASSYSLAGGSNEQFF	0.00033574	1	0	0	0	0	0	0		0	0	0	0	0	0	0	0	0	0	0	0	0	0	0	0	0	0	0	0	0	0	0	0	0	0	0	0	0	0	0	0	0	0	0	0	0	0	0	0
CASSYERGAYEQYF	0.00033574	1	0	0	0	0	0	0		0	0	0	0	0	0	0	0	0	0	0	0	0	0	0	0	0	0	0	0	0	0	0	0	0	0	0	0	0	0	0	0	0	0	0	0	0	0	0	0
CASSWTITDTQYF	0.00033574	1	0	0	0	0	0	0		0	0	0	0	0	0	0	0	0	0	0	0	0	0	0	0	0	0	0	0	0	0	0	0	0	0	0	0	0	0	0	0	0	0	0	0	0	0	0	0
CASSSINRFPEAFF	0.00033574	1	0	0	0	0	0	0		0	0	0	0	0	0	0	0	0	0	0	0	0	0	0	0	0	0	0	0	0	0	0	0	0	0	0	0	0	0	0	0	0	0	0	0	0	0	0	0
CASSSHVNYGYTF	0.00033574	1	0	0	0	0	0	0		0	0	0	0	0	0	0	0	0	0	0	0	0	0	0	0	0	0	0	0	0	0	0	0	0	0	0	0	0	0	0	0	0	0	0	0	0	0	0	0
CASSSGFYGNEKLFF	0.00033574	1	0	0	0	0	0	0		0	0	0	0	0	0	0	0	0	0	0	0	0	0	0	0	0	0	0	0	0	0	0	0	0	0	0	0	0	0	0	0	0	0	0	0	0	0	0	0
CASSRTFYNEQFF	0.00033574	1	0	0	0	0	0	0		0	0	0	0	0	0	0	0	0	0	0	0	0	0	0	0	0	0	0	0	0	0	0	0	0	0	0	0	0	0	0	0	0	0	0	0	0	0	0	0
CASSQDRRVSQYF	0.00033574	1	0	0	0	0	0	0		0	0	0	0	0	0	0	0	0	0	0	0	0	0	0	0	0	0	0	0	0	0	0	0	0	0	0	0	0	0	0	0	0	0	0	0	0	0	0	0
CASSQDRGRKTQYF	0.00033574	1	0	0	0	0	0	0		0	0	0	0	0	0	0	0	0	0	0	0	0	0	0	0	0	0	0	0	0	0	0	0	0	0	0	0	0	0	0	0	0	0	0	0	0	0	0	0
CASSQDQPGQGNQPQHF	0.00033574	1	0	0	0	0	0	0		0	0	0	0	0	0	0	0	0	0	0	0	0	0	0	0	0	0	0	0	0	0	0	0	0	0	0	0	0	0	0	0	0	0	0	0	0	0	0	0
CASSPTIYGYTF	0.00033574	1	0	0	0	0	0	0		0	0	0	0	0	0	0	0	0	0	0	0	0	0	0	0	0	0	0	0	0	0	0	0	0	0	0	0	0	0	0	0	0	0	0	0	0	0	0	0
CASSPSGQGSTGELFF	0.00033574	1	0	0	0	0	0	0		0	0	0	0	0	0	0	0	0	0	0	0	0	0	0	0	0	0	0	0	0	0	0	0	0	0	0	0	0	0	0	0	0	0	0	0	0	0	0	0
CASSPSADRGGETQYF	0.00033574	1	0	0	0	0	0	0		0	0	0	0	0	0	0	0	0	0	0	0	0	0	0	0	0	0	0	0	0	0	0	0	0	0	0	0	0	0	0	0	0	0	0	0	0	0	0	0
CASSPLGRATEAFF	0.00033574	1	0	0	0	0	0	0		0	0	0	0	0	0	0	0	0	0	0	0	0	0	0	0	0	0	0	0	0	0	0	0	0	0	0	0	0	0	0	0	0	0	0	0	0	0	0	0
CASSPFEELLEAFF	0.00033574	1	0	0	0	0	0	0		0	0	0	0	0	0	0	0	0	0	0	0	0	0	0	0	0	0	0	0	0	0	0	0	0	0	0	0	0	0	0	0	0	0	0	0	0	0	0	0
CASSPAVMVNEQFF	0.00033574	1	0	0	0	0	0	0		0	0	0	0	0	0	0	0	0	0	0	0	0	0	0	0	0	0	0	0	0	0	0	0	0	0	0	0	0	0	0	0	0	0	0	0	0	0	0	0
CASSLYGGVGTEAFF	0.00033574	1	0	0	0	0	0	0		0	0	0	0	0	0	0	0	0	0	0	0	0	0	0	0	0	0	0	0	0	0	0	0	0	0	0	0	0	0	0	0	0	0	0	0	0	0	0	0
CASSLVGLETQYF	0.00033574	1	0	0	0	0	0	5.6212e-06		0	0	0	0	0	0	0	0	0	0	0	0	0	0	0	0	0	0	0	0	0	0	0	0	0	0	0	0	0	0	0	0	0	0	0	0	0	0	0	0
CASSLTGRNEKLFF	0.00033574	1	0	0	0	0	0	0		0	0	0	0	0	0	0	0	0	0	0	0	0	0	0	0	0	0	0	0	0	0	0	0	0	0	0	0	0	0	0	0	0	0	0	0	0	0	0	0
CASSLSEMGYTF	0.00033574	1	0	0	0	0	0	0		0	0	0	0	0	0	0	0	0	0	0	0	0	0	0	0	0	0	0	0	0	0	0	0	0	0	0	0	0	0	0	0	0	0	0	0	0	0	0	0
CASSLGAFANYGYTF	0.00033574	1	0	0	0	0	0	0		0	0	0	0	0	0	0	0	0	0	0	0	0	0	0	0	0	0	0	0	0	0	0	0	0	0	0	0	0	0	0	0	0	0	0	0	0	0	0	0
CASSLFRGAGYTF	0.00033574	1	0	0	0	0	0	0		0	0	0	0	0	0	0	0	0	0	0	0	0	0	0	0	0	0	0	0	0	0	0	0	0	0	0	0	0	0	0	0	0	0	0	0	0	0	0	0
CASSLDSGANTEAFF	0.00033574	1	0	0	0	0	0	0		0	0	0	0	0	0	0	0	0	0	0	0	0	0	0	0	0	0	0	0	0	0	0	0	0	0	0	0	0	0	0	0	0	0	0	0	0	0	0	0
CASSKGQGGRGAFF	0.00033574	1	0	0	0	0	0	0		0	0	0	0	0	0	0	0	0	0	0	0	0	0	0	0	0	0	0	0	0	0	0	0	0	0	0	0	0	0	0	0	0	0	0	0	0	0	0	0
CASSIFGGQASPDTIYF	0.00033574	1	0	0	0	0	0	0		0	0	0	0	0	0	0	0	0	0	0	0	0	0	0	0	0	0	0	0	0	0	0	0	0	0	0	0	0	0	0	0	0	0	0	0	0	0	0	0
CASSHREIIVNTEAFF	0.00033574	1	0	0	0	0	0	0		0	0	0	0	0	0	0	0	0	0	0	0	0	0	0	0	0	0	0	0	0	0	0	0	0	0	0	0	0	0	0	0	0	0	0	0	0	0	0	0
CASSHLRGVRGGTEAFF	0.00033574	1	0	0	0	0	0	0		0	0	0	0	0	0	0	0	0	0	0	0	0	0	0	0	0	0	0	0	0	0	0	0	0	0	0	0	0	0	0	0	0	0	0	0	0	0	0	0
CASSFNVMTTEAFF	0.00033574	1	0	0	0	0	0	0		0	0	0	0	0	0	0	0	0	0	0	0	0	0	0	0	0	0	0	0	0	0	0	0	0	0	0	0	0	0	0	0	0	0	0	0	0	0	0	0
CASSFGLRGGYTF	0.00033574	1	0	0	0	0	0	0		0	0	0	0	0	0	0	0	0	0	0	0	0	0	0	0	0	0	0	0	0	0	0	0	0	0	0	0	0	0	0	0	0	0	0	0	0	0	0	0
CASSETGTGGEKLFF	0.00033574	1	0	0	0	0	0	0		0	0	0	0	0	0	0	0	0	0	0	0	0	0	0	0	0	0	0	0	0	0	0	0	0	0	0	0	0	0	0	0	0	0	0	0	0	0	0	0
CASSASARRAEAFF	0.00033574	1	0	0	0	0	0	0		0	0	0	0	0	0	0	0	0	0	0	0	0	0	0	0	0	0	0	0	0	0	0	0	0	0	0	0	0	0	0	0	0	0	0	0	0	0	0	0
CASSALTGSTEAFF	0.00033574	1	0	0	0	0	0	0		0	0	0	0	0	0	0	0	0	0	0	0	0	0	0	0	0	0	0	0	0	0	0	0	0	0	0	0	0	0	0	0	0	0	0	0	0	0	0	0
CASRTGSVQGRGYTF	0.00033574	1	0	0	0	0	0	0		0	0	0	0	0	0	0	0	0	0	0	0	0	0	0	0	0	0	0	0	0	0	0	0	0	0	0	0	0	0	0	0	0	0	0	0	0	0	0	0
CASRREKTQYF	0.00033574	1	0	0	0	0	0	0		0	0	0	0	0	0	0	0	0	0	0	0	0	0	0	0	0	0	0	0	0	0	0	0	0	0	0	0	0	0	0	0	0	0	0	0	0	0	0	0
CASRPGTYANQPQHF	0.00033574	1	0	0	0	0	0	0		0	0	0	0	0	0	0	0	0	0	0	0	0	0	0	0	0	0	0	0	0	0	0	0	0	0	0	0	0	0	0	0	0	0	0	0	0	0	0	0
CASRIMGLDEQYF	0.00033574	1	0	0	0	0	0	0		0	0	0	0	0	0	0	0	0	0	0	0	0	0	0	0	0	0	0	0	0	0	0	0	0	0	0	0	0	0	0	0	0	0	0	0	0	0	0	0
CASRGQRTLTGELFF	0.00033574	1	0	0	0	0	0	0		0	0	0	0	0	0	0	0	0	0	0	0	0	0	0	0	0	0	0	0	0	0	0	0	0	0	0	0	0	0	0	0	0	0	0	0	0	0	0	0
CASNGDERPEAFF	0.00033574	1	0	0	0	0	0	0		0	0	0	0	0	0	0	0	0	0	0	0	0	0	0	0	0	0	0	0	0	0	0	0	0	0	0	0	0	0	0	0	0	0	0	0	0	0	0	0
CASMGTGMNTEAFF	0.00033574	1	0	0	0	0	0	0		0	0	0	0	0	0	0	0	0	0	0	0	0	0	0	0	0	0	0	0	0	0	0	0	0	0	0	0	0	0	0	0	0	0	0	0	0	0	0	0
CASHQGRNTEAFF	0.00033574	1	0	0	0	0	0	0		0	0	0	0	0	0	0	0	0	0	0	0	0	0	0	0	0	0	0	0	0	0	0	0	0	0	0	0	0	0	0	0	0	0	0	0	0	0	0	0
CAISSDTDTQYF	0.00033574	1	0	0	0	0	0	0		0	0	0	0	0	0	0	0	0	0	0	0	0	0	0	0	0	0	0	0	0	0	0	0	0	0	0	0	0	0	0	0	0	0	0	0	0	0	0	0
CAISPRDKFNEQFF	0.00033574	1	0	0	0	0	0	0		0	0	0	0	0	0	0	0	0	0	0	0	0	0	0	0	0	0	0	0	0	0	0	0	0	0	0	0	0	0	0	0	0	0	0	0	0	0	0	0
CAISLSILSTDTQYF	0.00033574	1	0	0	0	0	0	0		0	0	0	0	0	0	0	0	0	0	0	0	0	0	0	0	0	0	0	0	0	0	0	0	0	0	0	0	0	0	0	0	0	0	0	0	0	0	0	0
CAISERVVSNQPQHF	0.00033574	1	0	0	0	0	0	0		0	0	0	0	0	0	0	0	0	0	0	0	0	0	0	0	0	0	0	0	0	0	0	0	0	0	0	0	0	0	0	0	0	0	0	0	0	0	0	0
CAISEGHFLGEQFF	0.00033574	1	0	0	0	0	0	0		0	0	0	0	0	0	0	0	0	0	0	0	0	0	0	0	0	0	0	0	0	0	0	0	0	0	0	0	0	0	0	0	0	0	0	0	0	0	0	0
CASSLNNEQFF	0.295606	46	8.177e-05	2.907e-05	4.018e-05	3.269e-05	2.45652e-05	5.6212e-06		0	0	0.00274725	0.00440529	0.0016184	0.0186436	0.002849	0	0	0	0.00158169	0.00468933	0	0	0.00442478	0	0.00252258	0.00082891	0.0123457	0.0178571	0.00358423	0	0.0160429	0.0130395	0.00684932	0.00103734	0	0.0156863	0.00048036	0.00953458	0.00032088	0.0133682	0.00417454	0.0123457	0.00921659	0	0	0.00623078	0.00767132	0.00434783
CASRDGEYTDLGQFF	0.00384893	9	0	0	0	0	0	0		0	0	0	0	0	0	0	0	0	0	0	0	0	0	0	0	0	0	0	0	0	0	0	0	0	0	0	0	0	0	0	0	0	0	0	0	0	0	0	0
CASSIAGGPGSYEQYF	0.00242109	5	0	0	0	0	0	0		0	0	0	0	0	0	0	0	0	0	0	0	0	0	0	0	0	0	0	0	0	0	0	0	0	0	0	0	0	0	0	0	0	0	0	0	0	0	0	0
CASSTTGVREQYF	0.00303939	8	0	0	0	0	0	0		0	0	0	0	0	0	0	0	0	0	0	0	0	0	0	0	0	0	0	0	0	0	0	0	0	0	0	0	0	0	0	0	0	0	0	0	0	0	0	0
CASSQSIGVLLFF	0.00214063	7	0	0	0	0	0	0		0	0	0	0	0	0	0	0	0	0	0	0	0	0	0	0	0	0	0	0	0	0	0	0	0	0	0	0	0	0	0	0	0	0	0	0	0	0	0	0
CASRYSSGSDEQFF	0.00125922	6	0	0	0	0	0	0		0	0	0	0	0	0	0	0	0	0	0	0	0	0	0	0	0	0	0	0	0	0	0	0	0	0	0	0	0	0	0	0	0	0	0	0	0	0	0	0
CASSVQGNTYNEQFF	0.00195254	7	0	0	0	0	0	0		0	0	0	0	0	0	0	0	0	0	0	0	0	0	0	0	0	0	0	0	0	0	0	0	0	0	0	0	0	0	0	0	0	0	0	0	0	0	0	0
CASSTPPGLAIPDTQYF	0.00093091	4	0	0	0	0	0	0		0	0	0	0	0	0	0	0	0	0	0	0	0	0	0	0	0	0	0	0	0	0	0	0	0	0	0	0	0	0	0	0	0	0	0	0	0	0	0	0
CASSETGGSNQPQHF	0.00050963	6	0	5.81e-06	0	0	0	0		0	0	0	0	0	0	0	0	0	0	0	0	0	0	0	0	0	0	0	0	0	0	0	1.161e-05	0	0	0	0	0	0	0	0	0	0	0	0	0	1.585e-05	0	0
CASSQYRGSGEAFF	0.00031635	2	0	0	0	0	0	0		0	0	0	0	0	0	0	0	0	0	0	0	0	0	0	0	0	0	0	0	0	0	0	0	0	0	0	0	0	0	0	0	0	0	0	0	0	0	0	0
CASSLLGTPSTDTQYF	0.00031635	2	0	0	0	0	0	0		0	0	0	0	0	0	0	0	0	0	0	0	0	0	0	0	0	0	0	0	0	0	0	0	0	0	0	0	0	0	0	0	0	0	0	0	0	0	0	0
CASSHLAGGDSNEQFF	0.00031635	2	0	0	0	0	0	0		0	0	0	0	0	0	0	0	0	0	0	0	0	0	0	0	0	0	0	0	0	0	0	0	0	0	0	0	0	0	0	0	0	0	0	0	0	0	0	0
CASSMNSGPVEEAFF	0.00211347	5	0	0	0	0	0	0		0	0	0	0	0	0	0	0	0	0	0	0	0	0	0	0	0	0	0	0	0	0	0	0	0	0	0	0	0	0	0	0	0	0	0	0	0	0	0	0
CASSLAGAESYEQYF	0.00232291	6	0	0	0	0	0	0		0	0	0	0	0	0	0	0	0	0	0	0	0	0	0	0	0	0	0	0	0	0	0	0	0	0	0	0	0	0	0	0	0	0	0	0	0	0	0	0
CASRTGGTGYEQYF	0.00207874	6	0	0	0	0	0	0		0	0	0	0	0	0	0	0	0	0	0	0	0	0	0	0	0	0	0	0	0	0	0	0	0	0	0	0	0	0	0	0	0	0	0	0	0	0	0	0
CATSGTTPFYGYTF	0.00082384	4	0	0	0	0	0	0		0	0	0	0	0	0	0	0	0	0	0	0	0	0	0	0	0	0	0	0	0	0	0	0	0	0	0	0	0	0	0	0	0	0	0	0	0	0	0	0
CASTYRPGGEKLFF	0.00072381	3	0	0	0	0	0	0		0	0	0	0	0	0	0	0	0	0	0	0	0	0	0	0	0	0	0	0	0	0	0	0	0	0	0	0	0	0	0	0	0	0	0	0	0	0	0	0
CASSFGGGPNEKLFF	0.00045672	2	0	0	0	0	0	0		0	0	0	0	0	0	0	0	0	0	0	0	0	0	0	0	0	0	0	0	0	0	0	0	0	0	0	0	0	0	0	0	0	0	0	0	0	0	0	0
CAISEVQGGDQPQHF	0.00045672	2	0	0	0	0	0	0		0	0	0	0	0	0	0	0	0	0	0	0	0	0	0	0	0	0	0	0	0	0	0	0	0	0	0	0	0	0	0	0	0	0	0	0	0	0	0	0
CASSQTGTSVYEQYF	0.00139961	4	0	0	0	0	0	0		0	0	0	0	0	0	0	0	0	0	0	0	0	0	0	0	0	0	0	0	0	0	0	0	0	0	0	0	0	0	0	0	0	0	0	0	0	0	0	0
CASSLGTRDTEAFF	0.00128242	3	0	0	0	0	0	0		0	0	0	0	0	0	0	0	0	0	0	0	0	0	0	0	0	0	0	0	0	0	0	0	0	0	0	0	0	0	0	0	0	0	0	0	0	0	0	0
CSAREGVGTGELFF	0.00088245	4	0	0	0	0	0	0		0	0	0	0	0	0	0	0	0	0	0	0	0	0	0	0	0	0	0	0	0	0	0	0	0	0	0	0	0	0	0	0	0	0	0	0	0	0	0	0
CASSQDRAGGPSDTQYF	0.00078243	3	0	0	0	0	0	0		0	0	0	0	0	0	0	0	0	0	0	0	0	0	0	0	0	0	0	0	0	0	0	0	0	0	0	0	0	0	0	0	0	0	0	0	0	0	0	0
CASSLAGGYRGYTF	0.00051533	2	0	0	0	0	0	0		0	0	0	0	0	0	0	0	0	0	0	0	0	0	0	0	0	0	0	0	0	0	0	0	0	0	0	0	0	0	0	0	0	0	0	0	0	0	0	0
CASSYSPDQPQHF	0.0008116	3	0	0	0	0	0	0		0	0	0	0	0	0	0	0	0	0	0	0	0	0	0	0	0	0	0	0	0	0	0	0	0	0	0	0	0	0	0	0	0	0	0	0	0	0	0	0
CASSISEVETQYF	0.0004916	2	0	0	0	0	0	0		0	0	0	0	0	0	0	0	0	0	0	0	0	0	0	0	0	0	0	0	0	0	0	0	0	0	0	0	0	0	0	0	0	0	0	0	0	0	0	0
CASSQDRGQPQHF	0.00041552	8	1.022e-05	0	2.009e-05	0	0	1.12424e-05		0	0	0	0	0	0	0	0	0	0	0	0	0	0	0	0	1.704e-05	0	0	0	0	0	0	1.161e-05	0	0	0	0	0	0	0	0	0	0	0	0	0	1.585e-05	1.096e-05	0
CSAQTPEAGSRDEQFF	0.00032973	2	0	0	0	0	0	0		0	0	0	0	0	0	0	0	0	0	0	0	0	0	0	0	0	0	0	0	0	0	0	0	0	0	0	0	0	0	0	0	0	0	0	0	0	0	0	0
CSAPYGGARDYGYTF	0.00032973	2	0	0	0	0	0	0		0	0	0	0	0	0	0	0	0	0	0	0	0	0	0	0	0	0	0	0	0	0	0	0	0	0	0	0	0	0	0	0	0	0	0	0	0	0	0	0
CASSNRTSGRYEQYF	0.00032973	2	0	0	0	0	0	0		0	0	0	0	0	0	0	0	0	0	0	0	0	0	0	0	0	0	0	0	0	0	0	0	0	0	0	0	0	0	0	0	0	0	0	0	0	0	0	0
CASSERLAVAKNIQYF	0.00032973	2	0	0	0	0	0	0		0	0	0	0	0	0	0	0	0	0	0	0	0	0	0	0	0	0	0	0	0	0	0	0	0	0	0	0	0	0	0	0	0	0	0	0	0	0	0	0
CASSEMGLGTYEQYF	0.00045726	2	0	0	0	0	0	0		0	0	0	0	0	0	0	0	0	0	0	0	0	0	0	0	0	0	0	0	0	0	0	0	0	0	0	0	0	0	0	0	0	0	0	0	0	0	0	0
CASSHDWDSQETQYF	0.00069499	4	0	0	0	0	0	0		0	0	0	0	0	0	0	0	0	0	0	0	0	0	0	0	0	0	0	0	0	0	0	0	0	0	0	0	0	0	0	0	0	0	0	0	0	0	0	0
CAWTPGARANYEQYF	0.00053499	3	0	0	0	0	0	0		0	0	0	0	0	0	0	0	0	0	0	0	0	0	0	0	0	0	0	0	0	0	0	0	0	0	0	0	0	0	0	0	0	0	0	0	0	0	0	0
CSARDPTGSSGNTIYF	0.00031257	2	0	0	0	0	0	0		0	0	0	0	0	0	0	0	0	0	0	0	0	0	0	0	0	0	0	0	0	0	0	0	0	0	0	0	0	0	0	0	0	0	0	0	0	0	0	0
CSARIRVGQGYNEQFF	0.00065738	3	0	0	0	0	0	0		0	0	0	0	0	0	0	0	0	0	0	0	0	0	0	0	0	0	0	0	0	0	0	0	0	0	0	0	0	0	0	0	0	0	0	0	0	0	0	0
CASSWGTGTGFVQGKNIQYF	0.0011519	3	0	0	0	0	0	0		0	0	0	0	0	0	0	0	0	0	0	0	0	0	0	0	0	0	0	0	0	0	0	0	0	0	0	0	0	0	0	0	0	0	0	0	0	0	0	0
CASSQSNEQFF	0.00042145	4	0	0	0	0	0	0		0	0	0	0	0	0	0	0	0	0	0	0	0	0	0	0	0	0	0	0	0	0	0	0	0	0	0	0	0	1.796e-05	0	0	0	0	0	0	0	0	0	0
CSVGQGGDYTF	0.00039029	2	0	0	0	0	0	0		0	0	0	0	0	0	0	0	0	0	0	0	0	0	0	0	0	0	0	0	0	0	0	0	0	0	0	0	0	0	0	0	0	0	0	0	0	0	0	0
CAWSHDISYEQYF	0.00039029	2	0	0	0	0	0	0		0	0	0	0	0	0	0	0	0	0	0	0	0	0	0	0	0	0	0	0	0	0	0	0	0	0	0	0	0	0	0	0	0	0	0	0	0	0	0	0
CASGQPSTDTQYF	0.00039029	2	0	0	0	0	0	0		0	0	0	0	0	0	0	0	0	0	0	0	0	0	0	0	0	0	0	0	0	0	0	0	0	0	0	0	0	0	0	0	0	0	0	0	0	0	0	0
CAISESLGGTQYF	0.00039029	2	0	0	0	0	0	0		0	0	0	0	0	0	0	0	0	0	0	0	0	0	0	0	0	0	0	0	0	0	0	0	0	0	0	0	0	0	0	0	0	0	0	0	0	0	0	0
CSAEQTGEAFF	0.00070206	2	0	0	0	0	0	0		0	0	0	0	0	0	0	0	0	0	0	0	0	0	0	0	0	0	0	0	0	0	0	0	0	0	0	0	0	0	0	0	0	0	0	0	0	0	0	0
CASSYRDSYGYTF	0.00070206	2	0	0	0	0	0	0		0	0	0	0	0	0	0	0	0	0	0	0	0	0	0	0	0	0	0	0	0	0	0	0	0	0	0	0	0	0	0	0	0	0	0	0	0	0	0	0
CSARDLERGGANEQFF	0.00043496	2	0	0	0	0	0	0		0	0	0	0	0	0	0	0	0	0	0	0	0	0	0	0	0	0	0	0	0	0	0	0	0	0	0	0	0	0	0	0	0	0	0	0	0	0	0	0
CSAGPSGGAYEQYF	0.00043496	2	0	0	0	0	0	0		0	0	0	0	0	0	0	0	0	0	0	0	0	0	0	0	0	0	0	0	0	0	0	0	0	0	0	0	0	0	0	0	0	0	0	0	0	0	0	0
CATSREWDLPPAYGYTF	0.00043496	2	0	0	0	0	0	0		0	0	0	0	0	0	0	0	0	0	0	0	0	0	0	0	0	0	0	0	0	0	0	0	0	0	0	0	0	0	0	0	0	0	0	0	0	0	0	0
CSAREIQETQYF	0.0016911	2	0	0	0	0	0	0		0	0	0	0	0	0	0	0	0	0	0	0	0	0	0	0	0	0	0	0	0	0	0	0	0	0	0	0	0	0	0	0	0	0	0	0	0	0	0	0
CASSLGQNTGELFF	0.00809959	23	7.155e-05	5.233e-05	3.349e-05	8.172e-05	1.22826e-05	5.6212e-06		0	0	0	0	1.904e-05	3.128e-05	0	0	0	0	0	0	0	0	0	0	1.704e-05	3.684e-05	0	0	0	0	3.762e-05	1.161e-05	0	0	0.00716846	0	8.354e-05	3.591e-05	2.292e-05	1.476e-05	1.988e-05	0	0	0	0	1.585e-05	4.384e-05	0
CASSPSTDTQYF	0.00091691	20	0.00010221	6.396e-05	6.697e-05	4.903e-05	3.68478e-05	1.12424e-05		0	0	0	0	1.904e-05	4.171e-05	0	0	0	0	3.401e-05	2.171e-05	0	0	0	0	1.704e-05	0	0	0	0	0	7.523e-05	3.483e-05	0	0	0	0	0	1.796e-05	1.146e-05	2.951e-05	7.951e-05	0	0	0	0	0	4.384e-05	0
CASSGSSYEQYF	0.00034567	11	1.022e-05	2.326e-05	0	8.17e-06	0	0		0	0	0	0	1.904e-05	1.043e-05	0	0	0	0	0	0	0	0	0	0	1.704e-05	1.842e-05	0	0	0	0	0	0	0	0	0	0	0	0	0	0	0	0	0	0	0	1.585e-05	0	0
CASSEGETQYF	0.0003351	10	1.022e-05	0	6.7e-06	1.634e-05	0	1.12424e-05		0	0	0	0	0	2.085e-05	0	0	0	0	0	0	0	0	0	0	0	0	0	0	0	0	0	0	0	0	0	0	2.089e-05	1.796e-05	0	0	0	0	0	0	0	3.171e-05	1.096e-05	0
CSARLAGQETQYF	0.00042963	9	1.022e-05	5.81e-06	6.7e-06	0	0	0		0	0	0	0	0	1.043e-05	0	0	0	0	0	0	0	0	0	0	0	0	0	0	0	0	0	1.161e-05	0	0	0	0	0	0	0	0	0	0	0	0	0	0	1.096e-05	0
CSARDRDTEAFF	0.00027109	9	1.022e-05	1.163e-05	6.7e-06	0	0	0		0	0	0	0	0	0	0	0	0	0	1.701e-05	0	0	0	0	0	1.704e-05	0	0	0	0	0	0	1.161e-05	0	0	0	0	0	0	0	0	0	0	0	0	0	0	0	0
CASSQGTGGYGYTF	0.00028057	9	1.022e-05	5.81e-06	0	8.17e-06	0	0		0	0	0	0	1.904e-05	2.085e-05	0	0	0	0	0	0	0	0	0	0	0	0	0	0	0	0	0	0	0	0	0	0	2.089e-05	0	0	0	0	0	0	0	0	1.585e-05	0	0
CASSPRGGSYEQYF	0.0002603	8	1.022e-05	0	1.339e-05	0	0	0		0	0	0	0	0	1.043e-05	0	0	0	0	0	0	0	0	0	0	0	0	0	0	0	0	0	1.161e-05	0	0	0	0	0	0	1.146e-05	0	1.988e-05	0	0	0	0	0	0	0
CASSLGQGGYGYTF	0.00026657	8	0	5.81e-06	6.7e-06	2.452e-05	0	0		0	0	0	0	0	0	0	0	0	0	0	2.171e-05	0	0	0	0	0	0	0	0	0	0	0	0	0	0	0	0	0	0	0	0	0	0	0	0	0	0	1.096e-05	0
CASRSYEQYF	0.00035923	8	0	5.81e-06	0	0	0	2.24848e-05		0	0	0	0	0	0	0	0	0	0	0	0	0	0	0	0	0	7.368e-05	0	0	0	0	0	0	0	0	0	0	0	1.796e-05	1.146e-05	0	5.964e-05	0	0	0	0	0	1.096e-05	0
CASSLHYEQYF	0.00025821	7	0	0	2.009e-05	0	0	0		0	0	0	0	1.904e-05	0	0	0	0	0	0	0	0	0	0	0	0	0	0	0	0	0	0	1.161e-05	0	0	0	0	0	0	0	0	0	0	0	0	0	0	1.096e-05	0
CASSLRGGYGYTF	0.00036531	6	0	5.81e-06	0	0	0	9.55604e-05		0	0	0	0	0	0	0	0	0	0	0	0	0	0	0	0	1.704e-05	0	0	0	0	0	0	0	0	0	0	0	0	0	0	0	0	0	0	0	0	0	0	0
CASSLGTVYGYTF	0.00024792	6	0	0	0	1.634e-05	0	0		0	0	0	0	1.904e-05	1.043e-05	0	0	0	0	0	0	0	0	0	0	0	0	0	0	0	0	1.881e-05	0	0	0	0	0	0	0	0	0	0	0	0	0	0	0	0	0
CASSLDLNQPQHF	0.00025632	6	0	0	6.7e-06	8.17e-06	0	0		0	0	0	0	0	1.043e-05	0	0	0	0	0	0	0	0	0	0	0	0	0	0	0	0	0	2.322e-05	0	0	0	0	0	0	0	0	0	0	0	0	0	0	0	0
CASSTGTDTQYF	0.00021915	5	0	5.81e-06	6.7e-06	0	1.22826e-05	0		0	0	0	0	0	0	0	0	0	0	0	0	0	0	0	0	0	0	0	0	0	0	1.881e-05	0	0	0	0	0	0	0	0	0	0	0	0	0	0	0	0	0
CASSRSGNEQFF	0.00021952	5	0	0	0	8.17e-06	1.22826e-05	0		0	0	0	0	0	0	0	0	0	0	0	0	0	0	0	0	0	1.842e-05	0	0	0	0	0	0	0	0	0	0	0	0	0	0	0	0	0	0	0	0	0	0
CASSRDRIYGYTF	0.00020227	5	0	5.81e-06	6.7e-06	0	0	0		0	0	0	0	0	1.043e-05	0	0	0	0	0	0	0	0	0	0	0	0	0	0	0	0	0	0	0	0	0	0	0	0	1.146e-05	0	0	0	0	0	0	0	0	0
CASSLTGGSTDTQYF	0.00020683	5	1.022e-05	5.81e-06	0	8.17e-06	0	2.24848e-05		0	0	0	0	0	0	0	0	0	0	0	0	0	0	0	0	0	0	0	0	0	0	0	0	0	0	0	0	0	0	0	1.476e-05	0	0	0	0	0	0	0	0
CASSLSFYEQYF	0.00057961	5	0	5.81e-06	0	0	1.22826e-05	1.68636e-05		0	0	0	0	0	0	0	0	0	0	0	2.171e-05	0	0	0	0	0	0	0	0	0	0	0	1.161e-05	0	0	0	0	0	0	0	0	0	0	0	0	0	0	0.00037261	0
CASSLQGVETQYF	0.00021103	5	0	5.81e-06	6.7e-06	0	0	0		0	0	0	0	1.904e-05	0	0	0	0	0	0	0	0	0	0	0	0	0	0	0	0	0	0	1.161e-05	0	0	0	0	0	0	0	0	0	0	0	0	0	0	0	0
CASSLGGYTEAFF	0.00024466	5	0	1.744e-05	6.7e-06	3.269e-05	0	0		0	0	0	0	0	0	0	0	0	0	0	0	0	0	0	0	0	0	0	0	0	0	0	0	0	0	0	0	0	0	0	0	0	0	0	0	0	0	0	0
CASSLGANEQFF	0.00022412	5	0	5.81e-06	0	8.17e-06	0	0		0	0	0	0	1.904e-05	0	0	0	0	0	0	0	0	0	0	0	0	0	0	0	0	0	0	2.322e-05	0	0	0	0	0	0	0	0	0	0	0	0	0	0	0	0
CASSLEGDGYTF	0.00024292	5	0	0	6.7e-06	0	0	0		0	0	0	0	0	0	0	0	0	0	0	2.171e-05	0	0	0	0	0	0	0	0	0	0	0	0	0	0	0	0	0	0	0	1.476e-05	0	0	0	0	0	0	0	0
CSARDGYEQYF	0.00025924	4	1.022e-05	0	0	0	0	0		0	0	0	0	0	0	0	0	0	0	0	0	0	0	0	0	0	5.526e-05	0	0	0	0	0	0	0	0	0	0	0	0	0	0	0	0	0	0	0	0	0	0
CASSSGQAYEQYF	0.00019866	4	1.022e-05	5.81e-06	0	0	0	0		0	0	0	0	0	0	0	0	0	0	0	0	0	0	0	0	0	0	0	0	0	0	0	0	0	0	0	0	0	0	0	1.476e-05	0	0	0	0	0	0	0	0
CASSQVGGNEQYF	0.00023115	4	1.022e-05	0	0	0	0	0		0	0	0	0	1.904e-05	0	0	0	0	0	3.401e-05	0	0	0	0	0	0	0	0	0	0	0	0	0	0	0	0	0	0	0	0	0	0	0	0	0	0	0	0	0
CASSFGQGQETQYF	0.00019199	4	0	5.81e-06	6.7e-06	0	0	0		0	0	0	0	0	0	0	0	0	0	0	0	0	0	0	0	0	0	0	0	0	0	0	1.161e-05	0	0	0	0	0	0	0	0	0	0	0	0	0	0	0	0
CSARGGGSYNEQFF	0.00018391	3	1.022e-05	5.81e-06	0	0	0	0		0	0	0	0	0	0	0	0	0	0	0	0	0	0	0	0	0	0	0	0	0	0	0	0	0	0	0	0	0	0	0	0	0	0	0	0	0	0	0	0
CSALGETQYF	0.000194	3	0	0	0	8.17e-06	0	0		0	0	0	0	0	0	0	0	0	0	0	0	0	0	0	0	0	0	0	0	0	0	0	0	0	0	0	0	0	1.796e-05	0	0	0	0	0	0	0	0	0	0
CASSYTGGIYEQYF	0.00019628	3	0	0	6.7e-06	0	0	0		0	0	0	0	0	0	0	0	0	0	0	2.171e-05	0	0	0	0	0	0	0	0	0	0	0	0	0	0	0	0	0	0	0	0	0	0	0	0	0	0	0	0
CASSYSWGNQPQHF	0.00020166	3	0	0	0	0	0	0		0	0	0	0	1.904e-05	0	0	0	0	0	0	0	0	0	0	0	0	0	0	0	0	0	0	0	0	0	0	0	0	0	0	1.476e-05	0	0	0	0	0	0	0	0
CASSRDYTDTQYF	0.00018186	3	0	5.81e-06	0	8.17e-06	1.22826e-05	0		0	0	0	0	0	0	0	0	0	0	0	0	0	0	0	0	0	0	0	0	0	0	0	0	0	0	0	0	0	0	0	0	0	0	0	0	0	0	0	0
CASSPRTSGRYNEQFF	0.00019164	3	0	5.81e-06	0	0	0	0		0	0	0	0	0	0	0	0	0	0	0	0	0	0	0	0	0	0	0	0	0	0	0	0	0	0	0	0	0	1.796e-05	0	0	0	0	0	0	0	0	0	0
CASSLGQGFTGELFF	0.000187	3	0	0	0	8.17e-06	0	0		0	0	0	0	0	0	0	0	0	0	0	0	0	0	0	0	0	0	0	0	0	0	0	0	0	0	0	0	0	0	0	0	0	0	0	0	0	0	1.096e-05	0
CASSLEGATNEKLFF	0.00020714	3	0	0	0	2.452e-05	0	0		0	0	0	0	0	0	0	0	0	0	0	0	0	0	0	0	0	0	0	0	0	0	0	0	0	0	0	0	0	0	0	1.476e-05	0	0	0	0	0	0	0	0
CSARDRHYEQYF	0.00017604	2	0	0	0	8.17e-06	0	0		0	0	0	0	0	0	0	0	0	0	0	0	0	0	0	0	0	0	0	0	0	0	0	0	0	0	0	0	0	0	0	0	0	0	0	0	0	0	0	0
CASSYLGASTDTQYF	0.00018372	2	0	0	0	0	0	0		0	0	0	0	0	0	0	0	0	0	0	0	0	0	0	0	0	0	0	0	0	0	0	0	0	0	0	0	0	0	0	0	0	0	0	0	0	1.585e-05	0	0
CASSVVSDTQYF	0.00018629	2	0	0	0	0	0	0		0	0	0	0	0	0	0	0	0	0	0	0	0	0	0	0	0	1.842e-05	0	0	0	0	0	0	0	0	0	0	0	0	0	0	0	0	0	0	0	0	0	0
CASSTSGTTNTGELFF	0.0001795	2	0	1.163e-05	0	0	0	0		0	0	0	0	0	0	0	0	0	0	0	0	0	0	0	0	0	0	0	0	0	0	0	0	0	0	0	0	0	0	0	0	0	0	0	0	0	0	0	0
CASSQVLTDTQYF	0.00017604	2	0	0	0	8.17e-06	0	0		0	0	0	0	0	0	0	0	0	0	0	0	0	0	0	0	0	0	0	0	0	0	0	0	0	0	0	0	0	0	0	0	0	0	0	0	0	0	0	0
CASSQDSGGQPQHF	0.00018958	2	0	0	0	0	0	0		0	0	0	0	0	0	0	0	0	0	0	2.171e-05	0	0	0	0	0	0	0	0	0	0	0	0	0	0	0	0	0	0	0	0	0	0	0	0	0	0	0	0
CASSQDIAQPQHF	0.00017948	2	0	0	0	0	0	0		0	0	0	0	0	0	0	0	0	0	0	0	0	0	0	0	0	0	0	0	0	0	0	1.161e-05	0	0	0	0	0	0	0	0	0	0	0	0	0	0	0	0
CASSPRDRLFYGYTF	0.00018488	2	0	0	0	0	0	0		0	0	0	0	0	0	0	0	0	0	1.701e-05	0	0	0	0	0	0	0	0	0	0	0	0	0	0	0	0	0	0	0	0	0	0	0	0	0	0	0	0	0
CASSPGTGGNEQFF	0.00017604	2	0	0	0	8.17e-06	0	0		0	0	0	0	0	0	0	0	0	0	0	0	0	0	0	0	0	0	0	0	0	0	0	0	0	0	0	0	0	0	0	0	0	0	0	0	0	0	0	0
CASSPGLADSYNEQFF	0.00017809	2	1.022e-05	0	0	0	0	0		0	0	0	0	0	0	0	0	0	0	0	0	0	0	0	0	0	0	0	0	0	0	0	0	0	0	0	0	0	0	0	0	0	0	0	0	0	0	0	0
CASSLVGTGRETQYF	0.00018372	2	0	0	0	0	0	0		0	0	0	0	0	0	0	0	0	0	0	0	0	0	0	0	0	0	0	0	0	0	0	0	0	0	0	0	0	0	0	0	0	0	0	0	0	1.585e-05	0	0
CASSLSQGNEQFF	0.00018958	2	0	0	0	0	0	0		0	0	0	0	0	0	0	0	0	0	0	2.171e-05	0	0	0	0	0	0	0	0	0	0	0	0	0	0	0	0	0	0	0	0	0	0	0	0	0	0	0	0
CASSLGGVEETQYF	0.00018262	2	0	0	0	0	0	0		0	0	0	0	0	0	0	0	0	0	0	0	0	0	0	0	0	0	0	0	0	0	0	0	0	0	0	0	0	0	0	1.476e-05	0	0	0	0	0	0	0	0
CASSLAAGLNEKLFF	0.00018583	2	0	0	0	0	0	0		0	0	0	0	0	0	0	0	0	0	0	0	0	0	0	0	0	0	0	0	0	0	0	0	0	0	0	0	0	1.796e-05	0	0	0	0	0	0	0	0	0	0
CASSHTGDEQYF	0.00017457	2	0	0	6.7e-06	0	0	0		0	0	0	0	0	0	0	0	0	0	0	0	0	0	0	0	0	0	0	0	0	0	0	0	0	0	0	0	0	0	0	0	0	0	0	0	0	0	0	0
CASSHDSNYGYTF	0.00017883	2	0	0	0	0	0	0		0	0	0	0	0	0	0	0	0	0	0	0	0	0	0	0	0	0	0	0	0	0	0	0	0	0	0	0	0	0	0	0	0	0	0	0	0	0	1.096e-05	0
CASSGTGAGNTIYF	0.00017368	2	0	5.81e-06	0	0	0	0		0	0	0	0	0	0	0	0	0	0	0	0	0	0	0	0	0	0	0	0	0	0	0	0	0	0	0	0	0	0	0	0	0	0	0	0	0	0	0	0
CASSEGTSGYNEQFF	0.00017457	2	0	0	6.7e-06	0	0	0		0	0	0	0	0	0	0	0	0	0	0	0	0	0	0	0	0	0	0	0	0	0	0	0	0	0	0	0	0	0	0	0	0	0	0	0	0	0	0	0
CASRRTGGGQPQHF	0.00017457	2	0	0	6.7e-06	0	0	0		0	0	0	0	0	0	0	0	0	0	0	0	0	0	0	0	0	0	0	0	0	0	0	0	0	0	0	0	0	0	0	0	0	0	0	0	0	0	0	0
CTSSQERQSGRTQYF	0.00016787	1	0	0	0	0	0	0		0	0	0	0	0	0	0	0	0	0	0	0	0	0	0	0	0	0	0	0	0	0	0	0	0	0	0	0	0	0	0	0	0	0	0	0	0	0	0	0
CSVGPRGGGLEQYF	0.00016787	1	0	0	0	0	0	0		0	0	0	0	0	0	0	0	0	0	0	0	0	0	0	0	0	0	0	0	0	0	0	0	0	0	0	0	0	0	0	0	0	0	0	0	0	0	0	0
CSVEVGGGGYTF	0.00016787	1	0	0	0	0	0	0		0	0	0	0	0	0	0	0	0	0	0	0	0	0	0	0	0	0	0	0	0	0	0	0	0	0	0	0	0	0	0	0	0	0	0	0	0	0	0	0
CSVDDGHPNTEAFF	0.00016787	1	0	0	0	0	0	0		0	0	0	0	0	0	0	0	0	0	0	0	0	0	0	0	0	0	0	0	0	0	0	0	0	0	0	0	0	0	0	0	0	0	0	0	0	0	0	0
CSRRGQSEETQYF	0.00016787	1	0	0	0	0	0	0		0	0	0	0	0	0	0	0	0	0	0	0	0	0	0	0	0	0	0	0	0	0	0	0	0	0	0	0	0	0	0	0	0	0	0	0	0	0	0	0
CSGRTQSYEQYF	0.00016787	1	0	0	0	0	0	0		0	0	0	0	0	0	0	0	0	0	0	0	0	0	0	0	0	0	0	0	0	0	0	0	0	0	0	0	0	0	0	0	0	0	0	0	0	0	0	0
CSASRLYNSPLHF	0.00016787	1	0	0	0	0	0	0		0	0	0	0	0	0	0	0	0	0	0	0	0	0	0	0	0	0	0	0	0	0	0	0	0	0	0	0	0	0	0	0	0	0	0	0	0	0	0	0
CSASPSGRWAGYTF	0.00016787	1	0	0	0	0	0	0		0	0	0	0	0	0	0	0	0	0	0	0	0	0	0	0	0	0	0	0	0	0	0	0	0	0	0	0	0	0	0	0	0	0	0	0	0	0	0	0
CSASPFGGEETQYF	0.00016787	1	0	0	0	0	0	0		0	0	0	0	0	0	0	0	0	0	0	0	0	0	0	0	0	0	0	0	0	0	0	0	0	0	0	0	0	0	0	0	0	0	0	0	0	0	0	0
CSASKPSGEFYEQYF	0.00016787	1	0	0	0	0	0	0		0	0	0	0	0	0	0	0	0	0	0	0	0	0	0	0	0	0	0	0	0	0	0	0	0	0	0	0	0	0	0	0	0	0	0	0	0	0	0	0
CSASGTSGGPPYEQYF	0.00016787	1	0	0	0	0	0	0		0	0	0	0	0	0	0	0	0	0	0	0	0	0	0	0	0	0	0	0	0	0	0	0	0	0	0	0	0	0	0	0	0	0	0	0	0	0	0	0
CSASGPMGQRSGNTIYF	0.00016787	1	0	0	0	0	0	0		0	0	0	0	0	0	0	0	0	0	0	0	0	0	0	0	0	0	0	0	0	0	0	0	0	0	0	0	0	0	0	0	0	0	0	0	0	0	0	0
CSARSFLEAGALNEQFF	0.00016787	1	0	0	0	0	0	0		0	0	0	0	0	0	0	0	0	0	0	0	0	0	0	0	0	0	0	0	0	0	0	0	0	0	0	0	0	0	0	0	0	0	0	0	0	0	0	0
CSARRGEQYF	0.00016787	1	0	0	0	0	0	0		0	0	0	0	0	0	0	0	0	0	0	0	0	0	0	0	0	0	0	0	0	0	0	0	0	0	0	0	0	0	0	0	0	0	0	0	0	0	0	0
CSARQGAPGEQYF	0.00016787	1	0	0	0	0	0	0		0	0	0	0	0	0	0	0	0	0	0	0	0	0	0	0	0	0	0	0	0	0	0	0	0	0	0	0	0	0	0	0	0	0	0	0	0	0	0	0
CSARLDAGNEQFF	0.00016787	1	0	0	0	0	0	0		0	0	0	0	0	0	0	0	0	0	0	0	0	0	0	0	0	0	0	0	0	0	0	0	0	0	0	0	0	0	0	0	0	0	0	0	0	0	0	0
CSARIEGTGLLYF	0.00016787	1	0	0	0	0	0	0		0	0	0	0	0	0	0	0	0	0	0	0	0	0	0	0	0	0	0	0	0	0	0	0	0	0	0	0	0	0	0	0	0	0	0	0	0	0	0	0
CSARIAGSSYEQYF	0.00016787	1	0	0	0	0	0	0		0	0	0	0	0	0	0	0	0	0	0	0	0	0	0	0	0	0	0	0	0	0	0	0	0	0	0	0	0	0	0	0	0	0	0	0	0	0	0	0
CSARGGRGGSYEQYF	0.00016787	1	0	0	0	0	0	0		0	0	0	0	0	0	0	0	0	0	0	0	0	0	0	0	0	0	0	0	0	0	0	0	0	0	0	0	0	0	0	0	0	0	0	0	0	0	0	0
CSAREFGVLTDTQYF	0.00016787	1	0	0	0	0	0	0		0	0	0	0	0	0	0	0	0	0	0	0	0	0	0	0	0	0	0	0	0	0	0	0	0	0	0	0	0	0	0	0	0	0	0	0	0	0	0	0
CSARDSTGGSYEQYF	0.00016787	1	0	0	0	0	0	0		0	0	0	0	0	0	0	0	0	0	0	0	0	0	0	0	0	0	0	0	0	0	0	0	0	0	0	0	0	0	0	0	0	0	0	0	0	0	0	0
CSARDSKNEKLFF	0.00016787	1	0	0	0	0	0	0		0	0	0	0	0	0	0	0	0	0	0	0	0	0	0	0	0	0	0	0	0	0	0	0	0	0	0	0	0	0	0	0	0	0	0	0	0	0	0	0
CSARDSASGSSYEQYF	0.00016787	1	0	0	0	0	0	0		0	0	0	0	0	0	0	0	0	0	0	0	0	0	0	0	0	0	0	0	0	0	0	0	0	0	0	0	0	0	0	0	0	0	0	0	0	0	0	0
CSARDNNRVLSYEQYF	0.00016787	1	0	0	0	0	0	0		0	0	0	0	0	0	0	0	0	0	0	0	0	0	0	0	0	0	0	0	0	0	0	0	0	0	0	0	0	0	0	0	0	0	0	0	0	0	0	0
CSARDLQGSNQPQHF	0.00016787	1	0	0	0	0	0	0		0	0	0	0	0	0	0	0	0	0	0	0	0	0	0	0	0	0	0	0	0	0	0	0	0	0	0	0	0	0	0	0	0	0	0	0	0	0	0	0
CSARDIQVVGETQYF	0.00016787	1	0	0	0	0	0	0		0	0	0	0	0	0	0	0	0	0	0	0	0	0	0	0	0	0	0	0	0	0	0	0	0	0	0	0	0	0	0	0	0	0	0	0	0	0	0	0
CSARDGGSSLETQYF	0.00016787	1	0	0	0	0	0	0		0	0	0	0	0	0	0	0	0	0	0	0	0	0	0	0	0	0	0	0	0	0	0	0	0	0	0	0	0	0	0	0	0	0	0	0	0	0	0	0
CSAKDRGYGYTF	0.00016787	1	0	0	0	0	0	0		0	0	0	0	0	0	0	0	0	0	0	0	0	0	0	0	0	0	0	0	0	0	0	0	0	0	0	0	0	0	0	0	0	0	0	0	0	0	0	0
CSAISGTGGTGEQFF	0.00016787	1	0	0	0	0	0	0		0	0	0	0	0	0	0	0	0	0	0	0	0	0	0	0	0	0	0	0	0	0	0	0	0	0	0	0	0	0	0	0	0	0	0	0	0	0	0	0
CSAGGRGYEQYF	0.00016787	1	0	0	0	0	0	0		0	0	0	0	0	0	0	0	0	0	0	0	0	0	0	0	0	0	0	0	0	0	0	0	0	0	0	0	0	0	0	0	0	0	0	0	0	0	0	0
CSAGAGGIGGELFF	0.00016787	1	0	0	0	0	0	0		0	0	0	0	0	0	0	0	0	0	0	0	0	0	0	0	0	0	0	0	0	0	0	0	0	0	0	0	0	0	0	0	0	0	0	0	0	0	0	0
CSAEGLAGVVGGTDTQYF	0.00016787	1	0	0	0	0	0	0		0	0	0	0	0	0	0	0	0	0	0	0	0	0	0	0	0	0	0	0	0	0	0	0	0	0	0	0	0	0	0	0	0	0	0	0	0	0	0	0
CSAAPGAVNEQFF	0.00016787	1	0	0	0	0	0	0		0	0	0	0	0	0	0	0	0	0	0	0	0	0	0	0	0	0	0	0	0	0	0	0	0	0	0	0	0	0	0	0	0	0	0	0	0	0	0	0
CSAAPENTQYF	0.00016787	1	0	0	0	0	0	0		0	0	0	0	0	0	0	0	0	0	0	0	0	0	0	0	0	0	0	0	0	0	0	0	0	0	0	0	0	0	0	0	0	0	0	0	0	0	0	0
CSAAAYQTYEQYF	0.00016787	1	0	0	0	0	0	0		0	0	0	0	0	0	0	0	0	0	0	0	0	0	0	0	0	0	0	0	0	0	0	0	0	0	0	0	0	0	0	0	0	0	0	0	0	0	0	0
CAWRIRVDYRETQYF	0.00016787	1	0	0	0	0	0	0		0	0	0	0	0	0	0	0	0	0	0	0	0	0	0	0	0	0	0	0	0	0	0	0	0	0	0	0	0	0	0	0	0	0	0	0	0	0	0	0
CAVAGGPSYEQYF	0.00016787	1	0	0	0	0	0	0		0	0	0	0	0	0	0	0	0	0	0	0	0	0	0	0	0	0	0	0	0	0	0	0	0	0	0	0	0	0	0	0	0	0	0	0	0	0	0	0
CATSWTGIGELFF	0.00016787	1	0	0	0	0	0	0		0	0	0	0	0	0	0	0	0	0	0	0	0	0	0	0	0	0	0	0	0	0	0	0	0	0	0	0	0	0	0	0	0	0	0	0	0	0	0	0
CATSSRTGRETQYF	0.00016787	1	0	0	0	0	0	0		0	0	0	0	0	0	0	0	0	0	0	0	0	0	0	0	0	0	0	0	0	0	0	0	0	0	0	0	0	0	0	0	0	0	0	0	0	0	0	0
CATSSRHRGGNQPQHF	0.00016787	1	0	0	0	0	0	0		0	0	0	0	0	0	0	0	0	0	0	0	0	0	0	0	0	0	0	0	0	0	0	0	0	0	0	0	0	0	0	0	0	0	0	0	0	0	0	0
CATSRPDRGLGYGYTF	0.00016787	1	0	0	0	0	0	0		0	0	0	0	0	0	0	0	0	0	0	0	0	0	0	0	0	0	0	0	0	0	0	0	0	0	0	0	0	0	0	0	0	0	0	0	0	0	0	0
CATSREGQAYEQYF	0.00016787	1	0	0	0	0	0	0		0	0	0	0	0	0	0	0	0	0	0	0	0	0	0	0	0	0	0	0	0	0	0	0	0	0	0	0	0	0	0	0	0	0	0	0	0	0	0	0
CATSRDLSSTGELFF	0.00016787	1	0	0	0	0	0	0		0	0	0	0	0	0	0	0	0	0	0	0	0	0	0	0	0	0	0	0	0	0	0	0	0	0	0	0	0	0	0	0	0	0	0	0	0	0	0	0
CATSRDGTRVETQYF	0.00016787	1	0	0	0	0	0	0		0	0	0	0	0	0	0	0	0	0	0	0	0	0	0	0	0	0	0	0	0	0	0	0	0	0	0	0	0	0	0	0	0	0	0	0	0	0	0	0
CATSLGIARPNEQFF	0.00016787	1	0	0	0	0	0	0		0	0	0	0	0	0	0	0	0	0	0	0	0	0	0	0	0	0	0	0	0	0	0	0	0	0	0	0	0	0	0	0	0	0	0	0	0	0	0	0
CATSGGTGSSYEQYF	0.00016787	1	0	0	0	0	0	0		0	0	0	0	0	0	0	0	0	0	0	0	0	0	0	0	0	0	0	0	0	0	0	0	0	0	0	0	0	0	0	0	0	0	0	0	0	0	0	0
CATSDWQGTDTQYF	0.00016787	1	0	0	0	0	0	0		0	0	0	0	0	0	0	0	0	0	0	0	0	0	0	0	0	0	0	0	0	0	0	0	0	0	0	0	0	0	0	0	0	0	0	0	0	0	0	0
CATSDWDSTRHNEQFF	0.00016787	1	0	0	0	0	0	0		0	0	0	0	0	0	0	0	0	0	0	0	0	0	0	0	0	0	0	0	0	0	0	0	0	0	0	0	0	0	0	0	0	0	0	0	0	0	0	0
CATSDLRETESSNQPQHF	0.00016787	1	0	0	0	0	0	0		0	0	0	0	0	0	0	0	0	0	0	0	0	0	0	0	0	0	0	0	0	0	0	0	0	0	0	0	0	0	0	0	0	0	0	0	0	0	0	0
CATSDLQGGTFF	0.00016787	1	0	0	0	0	0	0		0	0	0	0	0	0	0	0	0	0	0	0	0	0	0	0	0	0	0	0	0	0	0	0	0	0	0	0	0	0	0	0	0	0	0	0	0	0	0	0
CASVDGFNEKLFF	0.00016787	1	0	0	0	0	0	0		0	0	0	0	0	0	0	0	0	0	0	0	0	0	0	0	0	0	0	0	0	0	0	0	0	0	0	0	0	0	0	0	0	0	0	0	0	0	0	0
CASTTPRGQVSTDTQYF	0.00016787	1	0	0	0	0	0	0		0	0	0	0	0	0	0	0	0	0	0	0	0	0	0	0	0	0	0	0	0	0	0	0	0	0	0	0	0	0	0	0	0	0	0	0	0	0	0	0
CASTRADEQYF	0.00016787	1	0	0	0	0	0	0		0	0	0	0	0	0	0	0	0	0	0	0	0	0	0	0	0	0	0	0	0	0	0	0	0	0	0	0	0	0	0	0	0	0	0	0	0	0	0	0
CASTPPGLAVMGSYEQYF	0.00016787	1	0	0	0	0	0	0		0	0	0	0	0	0	0	0	0	0	0	0	0	0	0	0	0	0	0	0	0	0	0	0	0	0	0	0	0	0	0	0	0	0	0	0	0	0	0	0
CASTPFESSYNEQFF	0.00016787	1	0	0	0	0	0	0		0	0	0	0	0	0	0	0	0	0	0	0	0	0	0	0	0	0	0	0	0	0	0	0	0	0	0	0	0	0	0	0	0	0	0	0	0	0	0	0
CASTNLGAGANQPQHF	0.00016787	1	0	0	0	0	0	0		0	0	0	0	0	0	0	0	0	0	0	0	0	0	0	0	0	0	0	0	0	0	0	0	0	0	0	0	0	0	0	0	0	0	0	0	0	0	0	0
CASTLDSGNTIYF	0.00016787	1	0	0	0	0	0	0		0	0	0	0	0	0	0	0	0	0	0	0	0	0	0	0	0	0	0	0	0	0	0	0	0	0	0	0	0	0	0	0	0	0	0	0	0	0	0	0
CASTDSYGYTF	0.00016787	1	0	0	0	0	0	0		0	0	0	0	0	0	0	0	0	0	0	0	0	0	0	0	0	0	0	0	0	0	0	0	0	0	0	0	0	0	0	0	0	0	0	0	0	0	0	0
CASTDSLGGNTEAFF	0.00016787	1	0	0	0	0	0	0		0	0	0	0	0	0	0	0	0	0	0	0	0	0	0	0	0	0	0	0	0	0	0	0	0	0	0	0	0	0	0	0	0	0	0	0	0	0	0	0
CASSYWAMKRGYTGELFF	0.00016787	1	0	0	0	0	0	0		0	0	0	0	0	0	0	0	0	0	0	0	0	0	0	0	0	0	0	0	0	0	0	0	0	0	0	0	0	0	0	0	0	0	0	0	0	0	0	0
CASSYSVGSSYNSPLHF	0.00016787	1	0	0	0	0	0	0		0	0	0	0	0	0	0	0	0	0	0	0	0	0	0	0	0	0	0	0	0	0	0	0	0	0	0	0	0	0	0	0	0	0	0	0	0	0	0	0
CASSYSPSGVYYNEQFF	0.00016787	1	0	0	0	0	0	0		0	0	0	0	0	0	0	0	0	0	0	0	0	0	0	0	0	0	0	0	0	0	0	0	0	0	0	0	0	0	0	0	0	0	0	0	0	0	0	0
CASSYSPGGDFGYTF	0.00016787	1	0	0	0	0	0	0		0	0	0	0	0	0	0	0	0	0	0	0	0	0	0	0	0	0	0	0	0	0	0	0	0	0	0	0	0	0	0	0	0	0	0	0	0	0	0	0
CASSYSAGLGAFF	0.00016787	1	0	0	0	0	0	0		0	0	0	0	0	0	0	0	0	0	0	0	0	0	0	0	0	0	0	0	0	0	0	0	0	0	0	0	0	0	0	0	0	0	0	0	0	0	0	0
CASSYRTSGSGEQYF	0.00016787	1	0	0	0	0	0	0		0	0	0	0	0	0	0	0	0	0	0	0	0	0	0	0	0	0	0	0	0	0	0	0	0	0	0	0	0	0	0	0	0	0	0	0	0	0	0	0
CASSYPGLAGPDTQYF	0.00016787	1	0	0	0	0	0	0		0	0	0	0	0	0	0	0	0	0	0	0	0	0	0	0	0	0	0	0	0	0	0	0	0	0	0	0	0	0	0	0	0	0	0	0	0	0	0	0
CASSYGAAGEQFF	0.00016787	1	0	0	0	0	0	0		0	0	0	0	0	0	0	0	0	0	0	0	0	0	0	0	0	0	0	0	0	0	0	0	0	0	0	0	0	0	0	0	0	0	0	0	0	0	0	0
CASSYDNMNTEAFF	0.00016787	1	0	0	0	0	0	0		0	0	0	0	0	0	0	0	0	0	0	0	0	0	0	0	0	0	0	0	0	0	0	0	0	0	0	0	0	0	0	0	0	0	0	0	0	0	0	0
CASSWRGQDLGGTGELFF	0.00016787	1	0	0	0	0	0	0		0	0	0	0	0	0	0	0	0	0	0	0	0	0	0	0	0	0	0	0	0	0	0	0	0	0	0	0	0	0	0	0	0	0	0	0	0	0	0	0
CASSWGTGTSSYGYTF	0.00016787	1	0	0	0	0	0	0		0	0	0	0	0	0	0	0	0	0	0	0	0	0	0	0	0	0	0	0	0	0	0	0	0	0	0	0	0	0	0	0	0	0	0	0	0	0	0	0
CASSWDRINSPLHF	0.00016787	1	0	0	0	0	0	0		0	0	0	0	0	0	0	0	0	0	0	0	0	0	0	0	0	0	0	0	0	0	0	0	0	0	0	0	0	0	0	0	0	0	0	0	0	0	0	0
CASSWDPNYGYTF	0.00016787	1	0	0	0	0	0	0		0	0	0	0	0	0	0	0	0	0	0	0	0	0	0	0	0	0	0	0	0	0	0	0	0	0	0	0	0	0	0	0	0	0	0	0	0	0	0	0
CASSVRRSLNGVAGRYQETQYF	0.00016787	1	0	0	0	0	0	0		0	0	0	0	0	0	0	0	0	0	0	0	0	0	0	0	0	0	0	0	0	0	0	0	0	0	0	0	0	0	0	0	0	0	0	0	0	0	0	0
CASSVQGALDEQYF	0.00016787	1	0	0	0	0	0	0		0	0	0	0	0	0	0	0	0	0	0	0	0	0	0	0	0	0	0	0	0	0	0	0	0	0	0	0	0	0	0	0	0	0	0	0	0	0	0	0
CASSVGSDQSNEQFF	0.00016787	1	0	0	0	0	0	0		0	0	0	0	0	0	0	0	0	0	0	0	0	0	0	0	0	0	0	0	0	0	0	0	0	0	0	0	0	0	0	0	0	0	0	0	0	0	0	0
CASSVDRDSGNTIYF	0.00016787	1	0	0	0	0	0	0		0	0	0	0	0	0	0	0	0	0	0	0	0	0	0	0	0	0	0	0	0	0	0	0	0	0	0	0	0	0	0	0	0	0	0	0	0	0	0	0
CASSVDGTENSPLHF	0.00016787	1	0	0	0	0	0	0		0	0	0	0	0	0	0	0	0	0	0	0	0	0	0	0	0	0	0	0	0	0	0	0	0	0	0	0	0	0	0	0	0	0	0	0	0	0	0	0
CASSTTGLVIQYF	0.00016787	1	0	0	0	0	0	0		0	0	0	0	0	0	0	0	0	0	0	0	0	0	0	0	0	0	0	0	0	0	0	0	0	0	0	0	0	0	0	0	0	0	0	0	0	0	0	0
CASSTSHGGVTGELFF	0.00016787	1	0	0	0	0	0	0		0	0	0	0	0	0	0	0	0	0	0	0	0	0	0	0	0	0	0	0	0	0	0	0	0	0	0	0	0	0	0	0	0	0	0	0	0	0	0	0
CASSSSGVGYEQYF	0.00016787	1	0	0	0	0	0	0		0	0	0	0	0	0	0	0	0	0	0	0	0	0	0	0	0	0	0	0	0	0	0	0	0	0	0	0	0	0	0	0	0	0	0	0	0	0	0	0
CASSSRGVNQPQHF	0.00016787	1	0	0	0	0	0	0		0	0	0	0	0	0	0	0	0	0	0	0	0	0	0	0	0	0	0	0	0	0	0	0	0	0	0	0	0	0	0	0	0	0	0	0	0	0	0	0
CASSSQGQTYGYTF	0.00016787	1	0	0	0	0	0	0		0	0	0	0	0	0	0	0	0	0	0	0	0	0	0	0	0	0	0	0	0	0	0	0	0	0	0	0	0	0	0	0	0	0	0	0	0	0	0	0
CASSSPLAETGGTSSGNTIYF	0.00016787	1	0	0	0	0	0	0		0	0	0	0	0	0	0	0	0	0	0	0	0	0	0	0	0	0	0	0	0	0	0	0	0	0	0	0	0	0	0	0	0	0	0	0	0	0	0	0
CASSSPGLVGDTQYF	0.00016787	1	0	0	0	0	0	0		0	0	0	0	0	0	0	0	0	0	0	0	0	0	0	0	0	0	0	0	0	0	0	0	0	0	0	0	0	0	0	0	0	0	0	0	0	0	0	0
CASSSPDREETQYF	0.00016787	1	0	0	0	0	0	0		0	0	0	0	0	0	0	0	0	0	0	0	0	0	0	0	0	0	0	0	0	0	0	0	0	0	0	0	0	0	0	0	0	0	0	0	0	0	0	0
CASSSLPIQGGSSYEQYF	0.00016787	1	0	0	0	0	0	0		0	0	0	0	0	0	0	0	0	0	0	0	0	0	0	0	0	0	0	0	0	0	0	0	0	0	0	0	0	0	0	0	0	0	0	0	0	0	0	0
CASSSFPTDSYEQYF	0.00016787	1	0	0	0	0	0	0		0	0	0	0	0	0	0	0	0	0	0	0	0	0	0	0	0	0	0	0	0	0	0	0	0	0	0	0	0	0	0	0	0	0	0	0	0	0	0	0
CASSRYLGQGRNIQYF	0.00016787	1	0	0	0	0	0	0		0	0	0	0	0	0	0	0	0	0	0	0	0	0	0	0	0	0	0	0	0	0	0	0	0	0	0	0	0	0	0	0	0	0	0	0	0	0	0	0
CASSRTSGRTSSYEQYF	0.00016787	1	0	0	0	0	0	0		0	0	0	0	0	0	0	0	0	0	0	0	0	0	0	0	0	0	0	0	0	0	0	0	0	0	0	0	0	0	0	0	0	0	0	0	0	0	0	0
CASSRPKTGYSNQPQHF	0.00016787	1	0	0	0	0	0	0		0	0	0	0	0	0	0	0	0	0	0	0	0	0	0	0	0	0	0	0	0	0	0	0	0	0	0	0	0	0	0	0	0	0	0	0	0	0	0	0
CASSRKGQGVYSNQPQHF	0.00016787	1	0	0	0	0	0	0		0	0	0	0	0	0	0	0	0	0	0	0	0	0	0	0	0	0	0	0	0	0	0	0	0	0	0	0	0	0	0	0	0	0	0	0	0	0	0	0
CASSRIHGGNEQFF	0.00016787	1	0	0	0	0	0	0		0	0	0	0	0	0	0	0	0	0	0	0	0	0	0	0	0	0	0	0	0	0	0	0	0	0	0	0	0	0	0	0	0	0	0	0	0	0	0	0
CASSRGQVYNSPLHF	0.00016787	1	0	0	0	0	0	0		0	0	0	0	0	0	0	0	0	0	0	0	0	0	0	0	0	0	0	0	0	0	0	0	0	0	0	0	0	0	0	0	0	0	0	0	0	0	0	0
CASSRGGTDLGDEQFF	0.00016787	1	0	0	0	0	0	0		0	0	0	0	0	0	0	0	0	0	0	0	0	0	0	0	0	0	0	0	0	0	0	0	0	0	0	0	0	0	0	0	0	0	0	0	0	0	0	0
CASSREIAGGPYEQYF	0.00016787	1	0	0	0	0	0	0		0	0	0	0	0	0	0	0	0	0	0	0	0	0	0	0	0	0	0	0	0	0	0	0	0	0	0	0	0	0	0	0	0	0	0	0	0	0	0	0
CASSRDTPRHYNEQFF	0.00016787	1	0	0	0	0	0	0		0	0	0	0	0	0	0	0	0	0	0	0	0	0	0	0	0	0	0	0	0	0	0	0	0	0	0	0	0	0	0	0	0	0	0	0	0	0	0	0
CASSRDRERSYNSPLHF	0.00016787	1	0	0	0	0	0	0		0	0	0	0	0	0	0	0	0	0	0	0	0	0	0	0	0	0	0	0	0	0	0	0	0	0	0	0	0	0	0	0	0	0	0	0	0	0	0	0
CASSRDHQETQYF	0.00016787	1	0	0	0	0	0	0		0	0	0	0	0	0	0	0	0	0	0	0	0	0	0	0	0	0	0	0	0	0	0	0	0	0	0	0	0	0	0	0	0	0	0	0	0	0	0	0
CASSQWLADTDTQYF	0.00016787	1	0	0	0	0	0	0		0	0	0	0	0	0	0	0	0	0	0	0	0	0	0	0	0	0	0	0	0	0	0	0	0	0	0	0	0	0	0	0	0	0	0	0	0	0	0	0
CASSQVQGDLTDTQYF	0.00016787	1	0	0	0	0	0	0		0	0	0	0	0	0	0	0	0	0	0	0	0	0	0	0	0	0	0	0	0	0	0	0	0	0	0	0	0	0	0	0	0	0	0	0	0	0	0	0
CASSQVPRGGTDTQYF	0.00016787	1	0	0	0	0	0	0		0	0	0	0	0	0	0	0	0	0	0	0	0	0	0	0	0	0	0	0	0	0	0	0	0	0	0	0	0	0	0	0	0	0	0	0	0	0	0	0
CASSQVLSSYNSPLHF	0.00016787	1	0	0	0	0	0	0		0	0	0	0	0	0	0	0	0	0	0	0	0	0	0	0	0	0	0	0	0	0	0	0	0	0	0	0	0	0	0	0	0	0	0	0	0	0	0	0
CASSQVGLTGLSGNTIYF	0.00016787	1	0	0	0	0	0	0		0	0	0	0	0	0	0	0	0	0	0	0	0	0	0	0	0	0	0	0	0	0	0	0	0	0	0	0	0	0	0	0	0	0	0	0	0	0	0	0
CASSQVGDRGRADGYTF	0.00016787	1	0	0	0	0	0	0		0	0	0	0	0	0	0	0	0	0	0	0	0	0	0	0	0	0	0	0	0	0	0	0	0	0	0	0	0	0	0	0	0	0	0	0	0	0	0	0
CASSQSRHDRGPYGYTF	0.00016787	1	0	0	0	0	0	0		0	0	0	0	0	0	0	0	0	0	0	0	0	0	0	0	0	0	0	0	0	0	0	0	0	0	0	0	0	0	0	0	0	0	0	0	0	0	0	0
CASSQRTSGSEQFF	0.00016787	1	0	0	0	0	0	0		0	0	0	0	0	0	0	0	0	0	0	0	0	0	0	0	0	0	0	0	0	0	0	0	0	0	0	0	0	0	0	0	0	0	0	0	0	0	0	0
CASSQRGNDNEQFF	0.00016787	1	0	0	0	0	0	0		0	0	0	0	0	0	0	0	0	0	0	0	0	0	0	0	0	0	0	0	0	0	0	0	0	0	0	0	0	0	0	0	0	0	0	0	0	0	0	0
CASSQPGTTADTQYF	0.00016787	1	0	0	0	0	0	0		0	0	0	0	0	0	0	0	0	0	0	0	0	0	0	0	0	0	0	0	0	0	0	0	0	0	0	0	0	0	0	0	0	0	0	0	0	0	0	0
CASSQNSVNTEAFF	0.00016787	1	0	0	0	0	0	0		0	0	0	0	0	0	0	0	0	0	0	0	0	0	0	0	0	0	0	0	0	0	0	0	0	0	0	0	0	0	0	0	0	0	0	0	0	0	0	0
CASSQLGGDEKLFF	0.00016787	1	0	0	0	0	0	0		0	0	0	0	0	0	0	0	0	0	0	0	0	0	0	0	0	0	0	0	0	0	0	0	0	0	0	0	0	0	0	0	0	0	0	0	0	0	0	0
CASSQHRGSYEQYF	0.00016787	1	0	0	0	0	0	0		0	0	0	0	0	0	0	0	0	0	0	0	0	0	0	0	0	0	0	0	0	0	0	0	0	0	0	0	0	0	0	0	0	0	0	0	0	0	0	0
CASSQGRGEIWNTEAFF	0.00016787	1	0	0	0	0	0	0		0	0	0	0	0	0	0	0	0	0	0	0	0	0	0	0	0	0	0	0	0	0	0	0	0	0	0	0	0	0	0	0	0	0	0	0	0	0	0	0
CASSQGGRANEQFF	0.00016787	1	0	0	0	0	0	0		0	0	0	0	0	0	0	0	0	0	0	0	0	0	0	0	0	0	0	0	0	0	0	0	0	0	0	0	0	0	0	0	0	0	0	0	0	0	0	0
CASSQEVGLNTEAFF	0.00016787	1	0	0	0	0	0	0		0	0	0	0	0	0	0	0	0	0	0	0	0	0	0	0	0	0	0	0	0	0	0	0	0	0	0	0	0	0	0	0	0	0	0	0	0	0	0	0
CASSQEVGDYTEAFF	0.00016787	1	0	0	0	0	0	0		0	0	0	0	0	0	0	0	0	0	0	0	0	0	0	0	0	0	0	0	0	0	0	0	0	0	0	0	0	0	0	0	0	0	0	0	0	0	0	0
CASSQERWGDGVRYEQYF	0.00016787	1	0	0	0	0	0	0		0	0	0	0	0	0	0	0	0	0	0	0	0	0	0	0	0	0	0	0	0	0	0	0	0	0	0	0	0	0	0	0	0	0	0	0	0	0	0	0
CASSQEGGGGGAQEQYF	0.00016787	1	0	0	0	0	0	0		0	0	0	0	0	0	0	0	0	0	0	0	0	0	0	0	0	0	0	0	0	0	0	0	0	0	0	0	0	0	0	0	0	0	0	0	0	0	0	0
CASSQDWKGGGYTF	0.00016787	1	0	0	0	0	0	0		0	0	0	0	0	0	0	0	0	0	0	0	0	0	0	0	0	0	0	0	0	0	0	0	0	0	0	0	0	0	0	0	0	0	0	0	0	0	0	0
CASSQDPSGNQPQHF	0.00016787	1	0	0	0	0	0	0		0	0	0	0	0	0	0	0	0	0	0	0	0	0	0	0	0	0	0	0	0	0	0	0	0	0	0	0	0	0	0	0	0	0	0	0	0	0	0	0
CASSQDPGSGANVLTF	0.00016787	1	0	0	0	0	0	0		0	0	0	0	0	0	0	0	0	0	0	0	0	0	0	0	0	0	0	0	0	0	0	0	0	0	0	0	0	0	0	0	0	0	0	0	0	0	0	0
CASSQDGPKANIQYF	0.00016787	1	0	0	0	0	0	0		0	0	0	0	0	0	0	0	0	0	0	0	0	0	0	0	0	0	0	0	0	0	0	0	0	0	0	0	0	0	0	0	0	0	0	0	0	0	0	0
CASSQDFGASGTYEQYF	0.00016787	1	0	0	0	0	0	0		0	0	0	0	0	0	0	0	0	0	0	0	0	0	0	0	0	0	0	0	0	0	0	0	0	0	0	0	0	0	0	0	0	0	0	0	0	0	0	0
CASSQAVWGANEKLFF	0.00016787	1	0	0	0	0	0	0		0	0	0	0	0	0	0	0	0	0	0	0	0	0	0	0	0	0	0	0	0	0	0	0	0	0	0	0	0	0	0	0	0	0	0	0	0	0	0	0
CASSQARTGDNSNQPQHF	0.00016787	1	0	0	0	0	0	0		0	0	0	0	0	0	0	0	0	0	0	0	0	0	0	0	0	0	0	0	0	0	0	0	0	0	0	0	0	0	0	0	0	0	0	0	0	0	0	0
CASSQAHGITNSPLHF	0.00016787	1	0	0	0	0	0	0		0	0	0	0	0	0	0	0	0	0	0	0	0	0	0	0	0	0	0	0	0	0	0	0	0	0	0	0	0	0	0	0	0	0	0	0	0	0	0	0
CASSQAETGATEAFF	0.00016787	1	0	0	0	0	0	0		0	0	0	0	0	0	0	0	0	0	0	0	0	0	0	0	0	0	0	0	0	0	0	0	0	0	0	0	0	0	0	0	0	0	0	0	0	0	0	0
CASSPYSGGAYNEQFF	0.00016787	1	0	0	0	0	0	0		0	0	0	0	0	0	0	0	0	0	0	0	0	0	0	0	0	0	0	0	0	0	0	0	0	0	0	0	0	0	0	0	0	0	0	0	0	0	0	0
CASSPTTGGGFDGQFF	0.00016787	1	0	0	0	0	0	0		0	0	0	0	0	0	0	0	0	0	0	0	0	0	0	0	0	0	0	0	0	0	0	0	0	0	0	0	0	0	0	0	0	0	0	0	0	0	0	0
CASSPTSGAEAFF	0.00016787	1	0	0	0	0	0	0		0	0	0	0	0	0	0	0	0	0	0	0	0	0	0	0	0	0	0	0	0	0	0	0	0	0	0	0	0	0	0	0	0	0	0	0	0	0	0	0
CASSPTRQGYNEQYF	0.00016787	1	0	0	0	0	0	0		0	0	0	0	0	0	0	0	0	0	0	0	0	0	0	0	0	0	0	0	0	0	0	0	0	0	0	0	0	0	0	0	0	0	0	0	0	0	0	0
CASSPTPGQGAEKLFF	0.00016787	1	0	0	0	0	0	0		0	0	0	0	0	0	0	0	0	0	0	0	0	0	0	0	0	0	0	0	0	0	0	0	0	0	0	0	0	0	0	0	0	0	0	0	0	0	0	0
CASSPTGGEYNEQFF	0.00016787	1	0	0	0	0	0	0		0	0	0	0	0	0	0	0	0	0	0	0	0	0	0	0	0	0	0	0	0	0	0	0	0	0	0	0	0	0	0	0	0	0	0	0	0	0	0	0
CASSPSLQGLNTEAFF	0.00016787	1	0	0	0	0	0	0		0	0	0	0	0	0	0	0	0	0	0	0	0	0	0	0	0	0	0	0	0	0	0	0	0	0	0	0	0	0	0	0	0	0	0	0	0	0	0	0
CASSPSLEGKYEQYF	0.00016787	1	0	0	0	0	0	0		0	0	0	0	0	0	0	0	0	0	0	0	0	0	0	0	0	0	0	0	0	0	0	0	0	0	0	0	0	0	0	0	0	0	0	0	0	0	0	0
CASSPRWESGNTIYF	0.00016787	1	0	0	0	0	0	0		0	0	0	0	0	0	0	0	0	0	0	0	0	0	0	0	0	0	0	0	0	0	0	0	0	0	0	0	0	0	0	0	0	0	0	0	0	0	0	0
CASSPRSGGTYEQYF	0.00016787	1	0	0	0	0	0	0		0	0	0	0	0	0	0	0	0	0	0	0	0	0	0	0	0	0	0	0	0	0	0	0	0	0	0	0	0	0	0	0	0	0	0	0	0	0	0	0
CASSPQPGELFF	0.00016787	1	0	0	0	0	0	0		0	0	0	0	0	0	0	0	0	0	0	0	0	0	0	0	0	0	0	0	0	0	0	0	0	0	0	0	0	0	0	0	0	0	0	0	0	0	0	0
CASSPPPGTAGNTIYF	0.00016787	1	0	0	0	0	0	0		0	0	0	0	0	0	0	0	0	0	0	0	0	0	0	0	0	0	0	0	0	0	0	0	0	0	0	0	0	0	0	0	0	0	0	0	0	0	0	0
CASSPPNGELFF	0.00016787	1	0	0	0	0	0	0		0	0	0	0	0	0	0	0	0	0	0	0	0	0	0	0	0	0	0	0	0	0	0	0	0	0	0	0	0	0	0	0	0	0	0	0	0	0	0	0
CASSPPGRAGDTQYF	0.00016787	1	0	0	0	0	0	0		0	0	0	0	0	0	0	0	0	0	0	0	0	0	0	0	0	0	0	0	0	0	0	0	0	0	0	0	0	0	0	0	0	0	0	0	0	0	0	0
CASSPPGGRAFF	0.00016787	1	0	0	0	0	0	0		0	0	0	0	0	0	0	0	0	0	0	0	0	0	0	0	0	0	0	0	0	0	0	0	0	0	0	0	0	0	0	0	0	0	0	0	0	0	0	0
CASSPNDRGRTEAFF	0.00016787	1	0	0	0	0	0	0		0	0	0	0	0	0	0	0	0	0	0	0	0	0	0	0	0	0	0	0	0	0	0	0	0	0	0	0	0	0	0	0	0	0	0	0	0	0	0	0
CASSPMGQVKETQYF	0.00016787	1	0	0	0	0	0	0		0	0	0	0	0	0	0	0	0	0	0	0	0	0	0	0	0	0	0	0	0	0	0	0	0	0	0	0	0	0	0	0	0	0	0	0	0	0	0	0
CASSPLVPRTGANTEAFF	0.00016787	1	0	0	0	0	0	0		0	0	0	0	0	0	0	0	0	0	0	0	0	0	0	0	0	0	0	0	0	0	0	0	0	0	0	0	0	0	0	0	0	0	0	0	0	0	0	0
CASSPLTGLNTGELFF	0.00016787	1	0	0	0	0	0	0		0	0	0	0	0	0	0	0	0	0	0	0	0	0	0	0	0	0	0	0	0	0	0	0	0	0	0	0	0	0	0	0	0	0	0	0	0	0	0	0
CASSPLRNEQFF	0.00016787	1	0	0	0	0	0	0		0	0	0	0	0	0	0	0	0	0	0	0	0	0	0	0	0	0	0	0	0	0	0	0	0	0	0	0	0	0	0	0	0	0	0	0	0	0	0	0
CASSPKIGQRLPNTIYF	0.00016787	1	0	0	0	0	0	0		0	0	0	0	0	0	0	0	0	0	0	0	0	0	0	0	0	0	0	0	0	0	0	0	0	0	0	0	0	0	0	0	0	0	0	0	0	0	0	0
CASSPIAGGGSEQFF	0.00016787	1	0	0	0	0	0	0		0	0	0	0	0	0	0	0	0	0	0	0	0	0	0	0	0	0	0	0	0	0	0	0	0	0	0	0	0	0	0	0	0	0	0	0	0	0	0	0
CASSPHRDLQFF	0.00016787	1	0	0	0	0	0	0		0	0	0	0	0	0	0	0	0	0	0	0	0	0	0	0	0	0	0	0	0	0	0	0	0	0	0	0	0	0	0	0	0	0	0	0	0	0	0	0
CASSPGTSDPSYNEQFF	0.00016787	1	0	0	0	0	0	0		0	0	0	0	0	0	0	0	0	0	0	0	0	0	0	0	0	0	0	0	0	0	0	0	0	0	0	0	0	0	0	0	0	0	0	0	0	0	0	0
CASSPGQGARTPLHF	0.00016787	1	0	0	0	0	0	0		0	0	0	0	0	0	0	0	0	0	0	0	0	0	0	0	0	0	0	0	0	0	0	0	0	0	0	0	0	0	0	0	0	0	0	0	0	0	0	0
CASSPERGVSTDTQYF	0.00016787	1	0	0	0	0	0	0		0	0	0	0	0	0	0	0	0	0	0	0	0	0	0	0	0	0	0	0	0	0	0	0	0	0	0	0	0	0	0	0	0	0	0	0	0	0	0	0
CASSMAFSGAYEQYF	0.00016787	1	0	0	0	0	0	0		0	0	0	0	0	0	0	0	0	0	0	0	0	0	0	0	0	0	0	0	0	0	0	0	0	0	0	0	0	0	0	0	0	0	0	0	0	0	0	0
CASSLYQRTNYGYTF	0.00016787	1	0	0	0	0	0	0		0	0	0	0	0	0	0	0	0	0	0	0	0	0	0	0	0	0	0	0	0	0	0	0	0	0	0	0	0	0	0	0	0	0	0	0	0	0	0	0
CASSLYLGTGGTGELFF	0.00016787	1	0	0	0	0	0	0		0	0	0	0	0	0	0	0	0	0	0	0	0	0	0	0	0	0	0	0	0	0	0	0	0	0	0	0	0	0	0	0	0	0	0	0	0	0	0	0
CASSLVRWVAAGDTQYF	0.00016787	1	0	0	0	0	0	0		0	0	0	0	0	0	0	0	0	0	0	0	0	0	0	0	0	0	0	0	0	0	0	0	0	0	0	0	0	0	0	0	0	0	0	0	0	0	0	0
CASSLVASGRAGELFF	0.00016787	1	0	0	0	0	0	0		0	0	0	0	0	0	0	0	0	0	0	0	0	0	0	0	0	0	0	0	0	0	0	0	0	0	0	0	0	0	0	0	0	0	0	0	0	0	0	0
CASSLTGRGPNEKLFF	0.00016787	1	0	0	0	0	0	0		0	0	0	0	0	0	0	0	0	0	0	0	0	0	0	0	0	0	0	0	0	0	0	0	0	0	0	0	0	0	0	0	0	0	0	0	0	0	0	0
CASSLTATADVSTDTQYF	0.00016787	1	0	0	0	0	0	0		0	0	0	0	0	0	0	0	0	0	0	0	0	0	0	0	0	0	0	0	0	0	0	0	0	0	0	0	0	0	0	0	0	0	0	0	0	0	0	0
CASSLTAGVVTGELFF	0.00016787	1	0	0	0	0	0	0		0	0	0	0	0	0	0	0	0	0	0	0	0	0	0	0	0	0	0	0	0	0	0	0	0	0	0	0	0	0	0	0	0	0	0	0	0	0	0	0
CASSLSWESGELFF	0.00016787	1	0	0	0	0	0	0		0	0	0	0	0	0	0	0	0	0	0	0	0	0	0	0	0	0	0	0	0	0	0	0	0	0	0	0	0	0	0	0	0	0	0	0	0	0	0	0
CASSLSLTGGGYTF	0.00016787	1	0	0	0	0	0	0		0	0	0	0	0	0	0	0	0	0	0	0	0	0	0	0	0	0	0	0	0	0	0	0	0	0	0	0	0	0	0	0	0	0	0	0	0	0	0	0
CASSLSLANIQYF	0.00016787	1	0	0	0	0	0	0		0	0	0	0	0	0	0	0	0	0	0	0	0	0	0	0	0	0	0	0	0	0	0	0	0	0	0	0	0	0	0	0	0	0	0	0	0	0	0	0
CASSLSGRADGYTF	0.00016787	1	0	0	0	0	0	0		0	0	0	0	0	0	0	0	0	0	0	0	0	0	0	0	0	0	0	0	0	0	0	0	0	0	0	0	0	0	0	0	0	0	0	0	0	0	0	0
CASSLRQGTDYEQYF	0.00016787	1	0	0	0	0	0	0		0	0	0	0	0	0	0	0	0	0	0	0	0	0	0	0	0	0	0	0	0	0	0	0	0	0	0	0	0	0	0	0	0	0	0	0	0	0	0	0
CASSLRDSSNEKLFF	0.00016787	1	0	0	0	0	0	0		0	0	0	0	0	0	0	0	0	0	0	0	0	0	0	0	0	0	0	0	0	0	0	0	0	0	0	0	0	0	0	0	0	0	0	0	0	0	0	0
CASSLRDGNTIYF	0.00016787	1	0	0	0	0	0	0		0	0	0	0	0	0	0	0	0	0	0	0	0	0	0	0	0	0	0	0	0	0	0	0	0	0	0	0	0	0	0	0	0	0	0	0	0	0	0	0
CASSLPGGSEQYF	0.00016787	1	0	0	0	0	0	0		0	0	0	0	0	0	0	0	0	0	0	0	0	0	0	0	0	0	0	0	0	0	0	0	0	0	0	0	0	0	0	0	0	0	0	0	0	0	0	0
CASSLPASGSETQYF	0.00016787	1	0	0	0	0	0	0		0	0	0	0	0	0	0	0	0	0	0	0	0	0	0	0	0	0	0	0	0	0	0	0	0	0	0	0	0	0	0	0	0	0	0	0	0	0	0	0
CASSLMTGSSYNSPLHF	0.00016787	1	0	0	0	0	0	0		0	0	0	0	0	0	0	0	0	0	0	0	0	0	0	0	0	0	0	0	0	0	0	0	0	0	0	0	0	0	0	0	0	0	0	0	0	0	0	0
CASSLLVGRSSYEQYF	0.00016787	1	0	0	0	0	0	0		0	0	0	0	0	0	0	0	0	0	0	0	0	0	0	0	0	0	0	0	0	0	0	0	0	0	0	0	0	0	0	0	0	0	0	0	0	0	0	0
CASSLLGGELSGYTF	0.00016787	1	0	0	0	0	0	0		0	0	0	0	0	0	0	0	0	0	0	0	0	0	0	0	0	0	0	0	0	0	0	0	0	0	0	0	0	0	0	0	0	0	0	0	0	0	0	0
CASSLKRASGYTF	0.00016787	1	0	0	0	0	0	0		0	0	0	0	0	0	0	0	0	0	0	0	0	0	0	0	0	0	0	0	0	0	0	0	0	0	0	0	0	0	0	0	0	0	0	0	0	0	0	0
CASSLIQGGETQYF	0.00016787	1	0	0	0	0	0	0		0	0	0	0	0	0	0	0	0	0	0	0	0	0	0	0	0	0	0	0	0	0	0	0	0	0	0	0	0	0	0	0	0	0	0	0	0	0	0	0
CASSLGRTSGKGETQYF	0.00016787	1	0	0	0	0	0	0		0	0	0	0	0	0	0	0	0	0	0	0	0	0	0	0	0	0	0	0	0	0	0	0	0	0	0	0	0	0	0	0	0	0	0	0	0	0	0	0
CASSLGRASGNTIYF	0.00016787	1	0	0	0	0	0	0		0	0	0	0	0	0	0	0	0	0	0	0	0	0	0	0	0	0	0	0	0	0	0	0	0	0	0	0	0	0	0	0	0	0	0	0	0	0	0	0
CASSLGGRQWNEQFF	0.00016787	1	0	0	0	0	0	0		0	0	0	0	0	0	0	0	0	0	0	0	0	0	0	0	0	0	0	0	0	0	0	0	0	0	0	0	0	0	0	0	0	0	0	0	0	0	0	0
CASSLGEQRVTGELFF	0.00016787	1	0	0	0	0	0	0		0	0	0	0	0	0	0	0	0	0	0	0	0	0	0	0	0	0	0	0	0	0	0	0	0	0	0	0	0	0	0	0	0	0	0	0	0	0	0	0
CASSLFQGSPYEQYF	0.00016787	1	0	0	0	0	0	0		0	0	0	0	0	0	0	0	0	0	0	0	0	0	0	0	0	0	0	0	0	0	0	0	0	0	0	0	0	0	0	0	0	0	0	0	0	0	0	0
CASSLEGQGHHGYTF	0.00016787	1	0	0	0	0	0	0		0	0	0	0	0	0	0	0	0	0	0	0	0	0	0	0	0	0	0	0	0	0	0	0	0	0	0	0	0	0	0	0	0	0	0	0	0	0	0	0
CASSLEAGGTFGYTF	0.00016787	1	0	0	0	0	0	0		0	0	0	0	0	0	0	0	0	0	0	0	0	0	0	0	0	0	0	0	0	0	0	0	0	0	0	0	0	0	0	0	0	0	0	0	0	0	0	0
CASSLDLATVNEKLFF	0.00016787	1	0	0	0	0	0	0		0	0	0	0	0	0	0	0	0	0	0	0	0	0	0	0	0	0	0	0	0	0	0	0	0	0	0	0	0	0	0	0	0	0	0	0	0	0	0	0
CASSLDGSGTYEQYF	0.00016787	1	0	0	0	0	0	0		0	0	0	0	0	0	0	0	0	0	0	0	0	0	0	0	0	0	0	0	0	0	0	0	0	0	0	0	0	0	0	0	0	0	0	0	0	0	0	0
CASSLATASNQPQHF	0.00016787	1	0	0	0	0	0	0		0	0	0	0	0	0	0	0	0	0	0	0	0	0	0	0	0	0	0	0	0	0	0	0	0	0	0	0	0	0	0	0	0	0	0	0	0	0	0	0
CASSLASQGTNTGELFF	0.00016787	1	0	0	0	0	0	0		0	0	0	0	0	0	0	0	0	0	0	0	0	0	0	0	0	0	0	0	0	0	0	0	0	0	0	0	0	0	0	0	0	0	0	0	0	0	0	0
CASSLARTRSQETQYF	0.00016787	1	0	0	0	0	0	0		0	0	0	0	0	0	0	0	0	0	0	0	0	0	0	0	0	0	0	0	0	0	0	0	0	0	0	0	0	0	0	0	0	0	0	0	0	0	0	0
CASSLAQPDSGYTF	0.00016787	1	0	0	0	0	0	0		0	0	0	0	0	0	0	0	0	0	0	0	0	0	0	0	0	0	0	0	0	0	0	0	0	0	0	0	0	0	0	0	0	0	0	0	0	0	0	0
CASSLAPGGETQYF	0.00016787	1	0	0	0	0	0	0		0	0	0	0	0	0	0	0	0	0	0	0	0	0	0	0	0	0	0	0	0	0	0	0	0	0	0	0	0	0	0	0	0	0	0	0	0	0	0	0
CASSLAGQGFQPQHF	0.00016787	1	0	0	0	0	0	0		0	0	0	0	0	0	0	0	0	0	0	0	0	0	0	0	0	0	0	0	0	0	0	0	0	0	0	0	0	0	0	0	0	0	0	0	0	0	0	0
CASSLAFGLNTEAFF	0.00016787	1	0	0	0	0	0	0		0	0	0	0	0	0	0	0	0	0	0	0	0	0	0	0	0	0	0	0	0	0	0	0	0	0	0	0	0	0	0	0	0	0	0	0	0	0	0	0
CASSKVLAGVLDTQYF	0.00016787	1	0	0	0	0	0	0		0	0	0	0	0	0	0	0	0	0	0	0	0	0	0	0	0	0	0	0	0	0	0	0	0	0	0	0	0	0	0	0	0	0	0	0	0	0	0	0
CASSKKSHASGTPGELFF	0.00016787	1	0	0	0	0	0	0		0	0	0	0	0	0	0	0	0	0	0	0	0	0	0	0	0	0	0	0	0	0	0	0	0	0	0	0	0	0	0	0	0	0	0	0	0	0	0	0
CASSISPPESYNSPLHF	0.00016787	1	0	0	0	0	0	0		0	0	0	0	0	0	0	0	0	0	0	0	0	0	0	0	0	0	0	0	0	0	0	0	0	0	0	0	0	0	0	0	0	0	0	0	0	0	0	0
CASSISETGSNSPLHF	0.00016787	1	0	0	0	0	0	0		0	0	0	0	0	0	0	0	0	0	0	0	0	0	0	0	0	0	0	0	0	0	0	0	0	0	0	0	0	0	0	0	0	0	0	0	0	0	0	0
CASSIQPGRLDGYTF	0.00016787	1	0	0	0	0	0	0		0	0	0	0	0	0	0	0	0	0	0	0	0	0	0	0	0	0	0	0	0	0	0	0	0	0	0	0	0	0	0	0	0	0	0	0	0	0	0	0
CASSINLGLAGAATPYNEQFF	0.00016787	1	0	0	0	0	0	0		0	0	0	0	0	0	0	0	0	0	0	0	0	0	0	0	0	0	0	0	0	0	0	0	0	0	0	0	0	0	0	0	0	0	0	0	0	0	0	0
CASSIGGSPLHF	0.00016787	1	0	0	0	0	0	0		0	0	0	0	0	0	0	0	0	0	0	0	0	0	0	0	0	0	0	0	0	0	0	0	0	0	0	0	0	0	0	0	0	0	0	0	0	0	0	0
CASSIAVYSGNTIYF	0.00016787	1	0	0	0	0	0	0		0	0	0	0	0	0	0	0	0	0	0	0	0	0	0	0	0	0	0	0	0	0	0	0	0	0	0	0	0	0	0	0	0	0	0	0	0	0	0	0
CASSIAGGSETQYF	0.00016787	1	0	0	0	0	0	0		0	0	0	0	0	0	0	0	0	0	0	0	0	0	0	0	0	0	0	0	0	0	0	0	0	0	0	0	0	0	0	0	0	0	0	0	0	0	0	0
CASSHTGLAGYGPTDTQYF	0.00016787	1	0	0	0	0	0	0		0	0	0	0	0	0	0	0	0	0	0	0	0	0	0	0	0	0	0	0	0	0	0	0	0	0	0	0	0	0	0	0	0	0	0	0	0	0	0	0
CASSHGRGDSGANVLTF	0.00016787	1	0	0	0	0	0	0		0	0	0	0	0	0	0	0	0	0	0	0	0	0	0	0	0	0	0	0	0	0	0	0	0	0	0	0	0	0	0	0	0	0	0	0	0	0	0	0
CASSHGQGETQYF	0.00016787	1	0	0	0	0	0	0		0	0	0	0	0	0	0	0	0	0	0	0	0	0	0	0	0	0	0	0	0	0	0	0	0	0	0	0	0	0	0	0	0	0	0	0	0	0	0	0
CASSGRLVVGNEQFF	0.00016787	1	0	0	0	0	0	0		0	0	0	0	0	0	0	0	0	0	0	0	0	0	0	0	0	0	0	0	0	0	0	0	0	0	0	0	0	0	0	0	0	0	0	0	0	0	0	0
CASSGRLAGGGETQYF	0.00016787	1	0	0	0	0	0	0		0	0	0	0	0	0	0	0	0	0	0	0	0	0	0	0	0	0	0	0	0	0	0	0	0	0	0	0	0	0	0	0	0	0	0	0	0	0	0	0
CASSGRGSLRDTGELFF	0.00016787	1	0	0	0	0	0	0		0	0	0	0	0	0	0	0	0	0	0	0	0	0	0	0	0	0	0	0	0	0	0	0	0	0	0	0	0	0	0	0	0	0	0	0	0	0	0	0
CASSGGDGTDTQYF	0.00016787	1	0	0	0	0	0	0		0	0	0	0	0	0	0	0	0	0	0	0	0	0	0	0	0	0	0	0	0	0	0	0	0	0	0	0	0	0	0	0	0	0	0	0	0	0	0	0
CASSGGAVYNEQFF	0.00016787	1	0	0	0	0	0	0		0	0	0	0	0	0	0	0	0	0	0	0	0	0	0	0	0	0	0	0	0	0	0	0	0	0	0	0	0	0	0	0	0	0	0	0	0	0	0	0
CASSGFVNQPQHF	0.00016787	1	0	0	0	0	0	0		0	0	0	0	0	0	0	0	0	0	0	0	0	0	0	0	0	0	0	0	0	0	0	0	0	0	0	0	0	0	0	0	0	0	0	0	0	0	0	0
CASSFYTEAFF	0.00016787	1	0	0	0	0	0	0		0	0	0	0	0	0	0	0	0	0	0	0	0	0	0	0	0	0	0	0	0	0	0	0	0	0	0	0	0	0	0	0	0	0	0	0	0	0	0	0
CASSFTSVADTQYF	0.00016787	1	0	0	0	0	0	0		0	0	0	0	0	0	0	0	0	0	0	0	0	0	0	0	0	0	0	0	0	0	0	0	0	0	0	0	0	0	0	0	0	0	0	0	0	0	0	0
CASSFTEYNEQFF	0.00016787	1	0	0	0	0	0	0		0	0	0	0	0	0	0	0	0	0	0	0	0	0	0	0	0	0	0	0	0	0	0	0	0	0	0	0	0	0	0	0	0	0	0	0	0	0	0	0
CASSFSPRQSAREKLFF	0.00016787	1	0	0	0	0	0	0		0	0	0	0	0	0	0	0	0	0	0	0	0	0	0	0	0	0	0	0	0	0	0	0	0	0	0	0	0	0	0	0	0	0	0	0	0	0	0	0
CASSFSGTPNYGYTF	0.00016787	1	0	0	0	0	0	0		0	0	0	0	0	0	0	0	0	0	0	0	0	0	0	0	0	0	0	0	0	0	0	0	0	0	0	0	0	0	0	0	0	0	0	0	0	0	0	0
CASSFPWTGRTYEQYF	0.00016787	1	0	0	0	0	0	0		0	0	0	0	0	0	0	0	0	0	0	0	0	0	0	0	0	0	0	0	0	0	0	0	0	0	0	0	0	0	0	0	0	0	0	0	0	0	0	0
CASSFPIQGQGGRETQYF	0.00016787	1	0	0	0	0	0	0		0	0	0	0	0	0	0	0	0	0	0	0	0	0	0	0	0	0	0	0	0	0	0	0	0	0	0	0	0	0	0	0	0	0	0	0	0	0	0	0
CASSFMLGAQHF	0.00016787	1	0	0	0	0	0	0		0	0	0	0	0	0	0	0	0	0	0	0	0	0	0	0	0	0	0	0	0	0	0	0	0	0	0	0	0	0	0	0	0	0	0	0	0	0	0	0
CASSFGIYGYTF	0.00016787	1	0	0	0	0	0	0		0	0	0	0	0	0	0	0	0	0	0	0	0	0	0	0	0	0	0	0	0	0	0	0	0	0	0	0	0	0	0	0	0	0	0	0	0	0	0	0
CASSFDSANYEQYF	0.00016787	1	0	0	0	0	0	0		0	0	0	0	0	0	0	0	0	0	0	0	0	0	0	0	0	0	0	0	0	0	0	0	0	0	0	0	0	0	0	0	0	0	0	0	0	0	0	0
CASSETAGAAYEQYF	0.00016787	1	0	0	0	0	0	0		0	0	0	0	0	0	0	0	0	0	0	0	0	0	0	0	0	0	0	0	0	0	0	0	0	0	0	0	0	0	0	0	0	0	0	0	0	0	0	0
CASSEDQSPQPQHF	0.00016787	1	0	0	0	0	0	0		0	0	0	0	0	0	0	0	0	0	0	0	0	0	0	0	0	0	0	0	0	0	0	0	0	0	0	0	0	0	0	0	0	0	0	0	0	0	0	0
CASSEASTTSTDTQYF	0.00016787	1	0	0	0	0	0	0		0	0	0	0	0	0	0	0	0	0	0	0	0	0	0	0	0	0	0	0	0	0	0	0	0	0	0	0	0	0	0	0	0	0	0	0	0	0	0	0
CASSDSQGRIRSNQPQHF	0.00016787	1	0	0	0	0	0	0		0	0	0	0	0	0	0	0	0	0	0	0	0	0	0	0	0	0	0	0	0	0	0	0	0	0	0	0	0	0	0	0	0	0	0	0	0	0	0	0
CASSDRRSYTF	0.00016787	1	0	0	0	0	0	0		0	0	0	0	0	0	0	0	0	0	0	0	0	0	0	0	0	0	0	0	0	0	0	0	0	0	0	0	0	0	0	0	0	0	0	0	0	0	0	0
CASSDKMGVGELFF	0.00016787	1	0	0	0	0	0	0		0	0	0	0	0	0	0	0	0	0	0	0	0	0	0	0	0	0	0	0	0	0	0	0	0	0	0	0	0	0	0	0	0	0	0	0	0	0	0	0
CASSDIGGETQYF	0.00016787	1	0	0	0	0	0	0		0	0	0	0	0	0	0	0	0	0	0	0	0	0	0	0	0	0	0	0	0	0	0	0	0	0	0	0	0	0	0	0	0	0	0	0	0	0	0	0
CASSDHRYSNQPQHF	0.00016787	1	0	0	0	0	0	0		0	0	0	0	0	0	0	0	0	0	0	0	0	0	0	0	0	0	0	0	0	0	0	0	0	0	0	0	0	0	0	0	0	0	0	0	0	0	0	0
CASSDGQGAVQPQHF	0.00016787	1	0	0	0	0	0	0		0	0	0	0	0	0	0	0	0	0	0	0	0	0	0	0	0	0	0	0	0	0	0	0	0	0	0	0	0	0	0	0	0	0	0	0	0	0	0	0
CASSATGRANYGYTF	0.00016787	1	0	0	0	0	0	0		0	0	0	0	0	0	0	0	0	0	0	0	0	0	0	0	0	0	0	0	0	0	0	0	0	0	0	0	0	0	0	0	0	0	0	0	0	0	0	0
CASSARGGDTQYF	0.00016787	1	0	0	0	0	0	0		0	0	0	0	0	0	0	0	0	0	0	0	0	0	0	0	0	0	0	0	0	0	0	0	0	0	0	0	0	0	0	0	0	0	0	0	0	0	0	0
CASSALGSLNTGELFF	0.00016787	1	0	0	0	0	0	0		0	0	0	0	0	0	0	0	0	0	0	0	0	0	0	0	0	0	0	0	0	0	0	0	0	0	0	0	0	0	0	0	0	0	0	0	0	0	0	0
CASSAGVISGTDTQYF	0.00016787	1	0	0	0	0	0	0		0	0	0	0	0	0	0	0	0	0	0	0	0	0	0	0	0	0	0	0	0	0	0	0	0	0	0	0	0	0	0	0	0	0	0	0	0	0	0	0
CASSAGTSAYNEQFF	0.00016787	1	0	0	0	0	0	0		0	0	0	0	0	0	0	0	0	0	0	0	0	0	0	0	0	0	0	0	0	0	0	0	0	0	0	0	0	0	0	0	0	0	0	0	0	0	0	0
CASSAGTGSSISYGYTF	0.00016787	1	0	0	0	0	0	0		0	0	0	0	0	0	0	0	0	0	0	0	0	0	0	0	0	0	0	0	0	0	0	0	0	0	0	0	0	0	0	0	0	0	0	0	0	0	0	0
CASRTGLERDEKLFF	0.00016787	1	0	0	0	0	0	0		0	0	0	0	0	0	0	0	0	0	0	0	0	0	0	0	0	0	0	0	0	0	0	0	0	0	0	0	0	0	0	0	0	0	0	0	0	0	0	0
CASRTEFGQGYYGYTF	0.00016787	1	0	0	0	0	0	0		0	0	0	0	0	0	0	0	0	0	0	0	0	0	0	0	0	0	0	0	0	0	0	0	0	0	0	0	0	0	0	0	0	0	0	0	0	0	0	0
CASRSRTTDTQYF	0.00016787	1	0	0	0	0	0	0		0	0	0	0	0	0	0	0	0	0	0	0	0	0	0	0	0	0	0	0	0	0	0	0	0	0	0	0	0	0	0	0	0	0	0	0	0	0	0	0
CASRSGTQDGYTF	0.00016787	1	0	0	0	0	0	0		0	0	0	0	0	0	0	0	0	0	0	0	0	0	0	0	0	0	0	0	0	0	0	0	0	0	0	0	0	0	0	0	0	0	0	0	0	0	0	0
CASRQNLNSNQPQHF	0.00016787	1	0	0	0	0	0	0		0	0	0	0	0	0	0	0	0	0	0	0	0	0	0	0	0	0	0	0	0	0	0	0	0	0	0	0	0	0	0	0	0	0	0	0	0	0	0	0
CASRPTRGTYNEQFF	0.00016787	1	0	0	0	0	0	0		0	0	0	0	0	0	0	0	0	0	0	0	0	0	0	0	0	0	0	0	0	0	0	0	0	0	0	0	0	0	0	0	0	0	0	0	0	0	0	0
CASRNGLAGGSDTQYF	0.00016787	1	0	0	0	0	0	0		0	0	0	0	0	0	0	0	0	0	0	0	0	0	0	0	0	0	0	0	0	0	0	0	0	0	0	0	0	0	0	0	0	0	0	0	0	0	0	0
CASRKTGYGYTF	0.00016787	1	0	0	0	0	0	0		0	0	0	0	0	0	0	0	0	0	0	0	0	0	0	0	0	0	0	0	0	0	0	0	0	0	0	0	0	0	0	0	0	0	0	0	0	0	0	0
CASRGTPTYEQYF	0.00016787	1	0	0	0	0	0	0		0	0	0	0	0	0	0	0	0	0	0	0	0	0	0	0	0	0	0	0	0	0	0	0	0	0	0	0	0	0	0	0	0	0	0	0	0	0	0	0
CASRGRGRHYGYTF	0.00016787	1	0	0	0	0	0	0		0	0	0	0	0	0	0	0	0	0	0	0	0	0	0	0	0	0	0	0	0	0	0	0	0	0	0	0	0	0	0	0	0	0	0	0	0	0	0	0
CASRDTNTNTGELFF	0.00016787	1	0	0	0	0	0	0		0	0	0	0	0	0	0	0	0	0	0	0	0	0	0	0	0	0	0	0	0	0	0	0	0	0	0	0	0	0	0	0	0	0	0	0	0	0	0	0
CASNSLSMNTEAFF	0.00016787	1	0	0	0	0	0	0		0	0	0	0	0	0	0	0	0	0	0	0	0	0	0	0	0	0	0	0	0	0	0	0	0	0	0	0	0	0	0	0	0	0	0	0	0	0	0	0
CASNRDRYTGELFF	0.00016787	1	0	0	0	0	0	0		0	0	0	0	0	0	0	0	0	0	0	0	0	0	0	0	0	0	0	0	0	0	0	0	0	0	0	0	0	0	0	0	0	0	0	0	0	0	0	0
CASNRDKNTEAFF	0.00016787	1	0	0	0	0	0	0		0	0	0	0	0	0	0	0	0	0	0	0	0	0	0	0	0	0	0	0	0	0	0	0	0	0	0	0	0	0	0	0	0	0	0	0	0	0	0	0
CASNFANQETQYF	0.00016787	1	0	0	0	0	0	0		0	0	0	0	0	0	0	0	0	0	0	0	0	0	0	0	0	0	0	0	0	0	0	0	0	0	0	0	0	0	0	0	0	0	0	0	0	0	0	0
CASMGVPNQPQHF	0.00016787	1	0	0	0	0	0	0		0	0	0	0	0	0	0	0	0	0	0	0	0	0	0	0	0	0	0	0	0	0	0	0	0	0	0	0	0	0	0	0	0	0	0	0	0	0	0	0
CASLVDRGTEAFF	0.00016787	1	0	0	0	0	0	0		0	0	0	0	0	0	0	0	0	0	0	0	0	0	0	0	0	0	0	0	0	0	0	0	0	0	0	0	0	0	0	0	0	0	0	0	0	0	0	0
CASKGRKGKNEQFF	0.00016787	1	0	0	0	0	0	0		0	0	0	0	0	0	0	0	0	0	0	0	0	0	0	0	0	0	0	0	0	0	0	0	0	0	0	0	0	0	0	0	0	0	0	0	0	0	0	0
CASIIDRDGAYEQYF	0.00016787	1	0	0	0	0	0	0		0	0	0	0	0	0	0	0	0	0	0	0	0	0	0	0	0	0	0	0	0	0	0	0	0	0	0	0	0	0	0	0	0	0	0	0	0	0	0	0
CASGRGTGILGETNEKLFF	0.00016787	1	0	0	0	0	0	0		0	0	0	0	0	0	0	0	0	0	0	0	0	0	0	0	0	0	0	0	0	0	0	0	0	0	0	0	0	0	0	0	0	0	0	0	0	0	0	0
CASGLVTGTGGFNTEAFF	0.00016787	1	0	0	0	0	0	0		0	0	0	0	0	0	0	0	0	0	0	0	0	0	0	0	0	0	0	0	0	0	0	0	0	0	0	0	0	0	0	0	0	0	0	0	0	0	0	0
CASGLAVAYNEQFF	0.00016787	1	0	0	0	0	0	0		0	0	0	0	0	0	0	0	0	0	0	0	0	0	0	0	0	0	0	0	0	0	0	0	0	0	0	0	0	0	0	0	0	0	0	0	0	0	0	0
CASGGRGRAGNEQFF	0.00016787	1	0	0	0	0	0	0		0	0	0	0	0	0	0	0	0	0	0	0	0	0	0	0	0	0	0	0	0	0	0	0	0	0	0	0	0	0	0	0	0	0	0	0	0	0	0	0
CASDSIHRDARNQPQHF	0.00016787	1	0	0	0	0	0	0		0	0	0	0	0	0	0	0	0	0	0	0	0	0	0	0	0	0	0	0	0	0	0	0	0	0	0	0	0	0	0	0	0	0	0	0	0	0	0	0
CANRWTGAYEAFF	0.00016787	1	0	0	0	0	0	0		0	0	0	0	0	0	0	0	0	0	0	0	0	0	0	0	0	0	0	0	0	0	0	0	0	0	0	0	0	0	0	0	0	0	0	0	0	0	0	0
CAISGSETDARSGANVLTF	0.00016787	1	0	0	0	0	0	0		0	0	0	0	0	0	0	0	0	0	0	0	0	0	0	0	0	0	0	0	0	0	0	0	0	0	0	0	0	0	0	0	0	0	0	0	0	0	0	0
CAISESKGANYGYTF	0.00016787	1	0	0	0	0	0	0		0	0	0	0	0	0	0	0	0	0	0	0	0	0	0	0	0	0	0	0	0	0	0	0	0	0	0	0	0	0	0	0	0	0	0	0	0	0	0	0
CAISDELAGAGTQYF	0.00016787	1	0	0	0	0	0	0		0	0	0	0	0	0	0	0	0	0	0	0	0	0	0	0	0	0	0	0	0	0	0	0	0	0	0	0	0	0	0	0	0	0	0	0	0	0	0	0
CAIRERDRGPTEAFF	0.00016787	1	0	0	0	0	0	0		0	0	0	0	0	0	0	0	0	0	0	0	0	0	0	0	0	0	0	0	0	0	0	0	0	0	0	0	0	0	0	0	0	0	0	0	0	0	0	0
CAGGTSGIPEQYF	0.00016787	1	0	0	0	0	0	0		0	0	0	0	0	0	0	0	0	0	0	0	0	0	0	0	0	0	0	0	0	0	0	0	0	0	0	0	0	0	0	0	0	0	0	0	0	0	0	0
CAGDRGFGQPQHF	0.00016787	1	0	0	0	0	0	0		0	0	0	0	0	0	0	0	0	0	0	0	0	0	0	0	0	0	0	0	0	0	0	0	0	0	0	0	0	0	0	0	0	0	0	0	0	0	0	0
CASSLGGSGTDTQYF	0.46407	49	0	5.81e-06	6.7e-06	1.634e-05	0	0		0	0	0.00274725	0.00440529	0.00020944	0.00859193	0.00854701	0.0202703	0.0021692	0.00343643	0.0197286	0.0189744	0	0.00584795	0.00884956	0	0.0207772	0.00698128	0.00925926	0.0133929	0	0.00363636	0.0157232	0.00377367	0.00684932	0.00103734	0.00358423	0.0196078	0.00277772	0.0091216	0.018061	0.00333466	0.0230395	0.00493827	0.00460829	0	0	0.00226718	0.005885	0.0173913
CASSADRGRGTDTQYF	0.386587	50	3.066e-05	5.81e-06	0	1.634e-05	1.22826e-05	1.12424e-05		0	0	0.00549451	0.0132159	0.00773024	0.00776818	0.00854701	0.00675676	0.0021692	0	0.0105106	0.00775042	0.0031746	0.00292398	0.0132743	0	0.00374979	0.0129863	0.0123457	0.00446429	0	0.00363636	0.0121497	0.00812791	0.00913242	0.00103734	0.00358423	0.00392157	0.00421879	0.00863679	0.0109328	0.0197424	0.0142332	0.00987654	0.00460829	0	0	0.0176935	0.00735351	0.0108696
CSAQGDSGYTF	0.0388616	20	0	0	0	0	0	0		0	0	0	0	0	5.214e-05	0	0	0	0	0	0.00030394	0	0.00292398	0	0	0.00032385	0.00088417	0	0	0	0	0	2.322e-05	0.00228311	0	0	0.00392157	0	0.00030525	0.0035526	0.0005607	0.001312	0	0	0	0	4.756e-05	0	0.00869565
CASSIGLVPMLFF	0.0704152	30	3.066e-05	3.489e-05	2.679e-05	2.452e-05	0	5.6212e-06		0	0	0	0	0.00100912	0.00087588	0	0	0	0	0.0016157	0.00136772	0	0	0	0	0.00066473	0.00110522	0	0	0	0	0.00133534	0.00105663	0	0	0	0	0.00133665	0.00026934	0.00237222	0.00956133	0.00385648	0	0	0	0	0.00065003	0.00052603	0.00869565
CASSPGPGDTQYF	0.0157262	2	0	0	0	0	0	0		0	0	0	0	0	0	0	0	0	0	0	0	0	0	0	0	0	0	0	0	0	0	0	0	0	0	0	0	0	0	0	0	0	0	0	0	0	0	0	0.00869565
CASLPFRQSRPYNEQFF	0.0164376	2	0	0	0	0	0	0		0	0	0	0	0	0	0	0	0	0	0	0	0	0	0	0	0	0	0	0	0	0	0	0	0	0	0	0	0	0	0	0	0	0	0	0	0	0	0	0.00869565
CASSEDWTGNIQYF	0.0832526	32	4.088e-05	1.744e-05	1.339e-05	2.452e-05	0	5.6212e-06		0	0	0	0	0.002856	0.00208542	0.002849	0.00675676	0	0	0.0055274	0.00948721	0	0	0	0	0.00074996	0.00213675	0.00308642	0	0	0	0.00110965	0.00251965	0	0	0	0	0.00027151	0.0021188	0.00075636	0.00147551	0.00077527	0	0	0	0	0.00315502	0.00172057	0.00652174
CASSPGTGSHNSPLHF	0.046433	31	2.044e-05	2.326e-05	1.339e-05	2.452e-05	1.22826e-05	0		0	0	0	0.00440529	0.00045696	0.00093844	0.002849	0	0	0	0.00295928	0.00138943	0	0	0.00442478	0	0.0018408	0.00012894	0	0	0	0	0.00060184	0.00095213	0	0	0	0	0.00054301	0.00093371	0.00033234	0.0010181	0.00312096	0.00246914	0	0	0	0.00161715	0.0009096	0.00652174
CSVTAGSNQPQHF	0.00771356	7	0	5.81e-06	0	8.17e-06	0.000380761	0.000168636		0	0	0	0	0	0	0	0	0	0	0	0	0	0	0	0	0	0	0	0	0	0	0	0	0	0	0	0	0	0	0	0	0	0	0	0	0	0	0	0.00652174
CASSLGGSKETQYF	0.00742381	7	1.022e-05	0	0	8.17e-06	3.68478e-05	5.6212e-06		0	0	0	0	0	0	0	0	0	0	0	0	0	0	0	0	0	0	0	0	0	0	0	0	0	0	0	0	0	0	0	0	0	0	0	0	0	0	0	0.00652174
CSALQDGKNTEAFF	0.00771699	5	0	5.81e-06	0	0	0.000221087	0.000539635		0	0	0	0	0	0	0	0	0	0	0	0	0	0	0	0	0	0	0	0	0	0	0	0	0	0	0	0	0	0	0	1.476e-05	0	0	0	0	0	0	0	0.00652174
CARQVPGETQYF	0.0147637	4	0	5.81e-06	0	8.17e-06	0	0		0	0	0	0	0	0	0	0	0	0	0	0	0	0	0	0	0	0	0	0	0	0	0	0	0	0	0	0	0	0	0	0	0	0	0	0	0	0	0	0.00652174
CASSQVNSPLHF	0.00687126	3	0	0	0	0	0	0		0	0	0	0	0	0	0	0	0	0	0	0	0	0	0	0	0	0	0	0	0	0	0	0	0	0	0	0	0	0	0	0	0	0	0	0	0	3.171e-05	0.00031781	0.00652174
CASSLGGASQETQYF	0.00876657	3	0	0	6.7e-06	0	0	0		0	0	0	0	0	0	0	0	0	0	0	0	0	0	0	0	0	0	0	0	0	0	0	0	0	0	0	0	0	0	0	0	0	0	0	0	0	0	0	0.00652174
CASSAASPIHHNSPLHF	0.00652174	1	0	0	0	0	0	0		0	0	0	0	0	0	0	0	0	0	0	0	0	0	0	0	0	0	0	0	0	0	0	0	0	0	0	0	0	0	0	0	0	0	0	0	0	0	0	0.00652174
CASTIAGRNEQFF	0.0773182	35	0	0	0	8.17e-06	0	0		0	0	0.00274725	0.00440529	0.0011424	0.00208542	0.002849	0	0	0	0.00034015	0.00073814	0	0	0	0	0.00032385	0.00044209	0.00308642	0	0	0	0.00253903	0.00062701	0.00228311	0	0	0.00392157	0.0001462	0.00034116	0.00092826	0.0002951	0.00139151	0	0.00460829	0	0	0.00337699	0.00046028	0.00434783
CASSYSYEQYF	0.0112739	29	7.155e-05	8.722e-05	2.679e-05	6.538e-05	0	0		0	0	0	0	9.52e-05	3.128e-05	0	0	0	0	0.00010204	8.684e-05	0	0	0	0.00529101	5.113e-05	5.526e-05	0	0	0	0	7.523e-05	5.806e-05	0	0	0	0	8.354e-05	5.387e-05	2.292e-05	2.951e-05	5.964e-05	0	0	0	0	3.171e-05	9.863e-05	0.00434783
CSAKIQGVDNSPLHF	0.0515043	28	1.022e-05	0	1.339e-05	8.17e-06	0	0		0	0	0	0	0.00013328	0.00083417	0	0.00675676	0	0	0.00113949	0.00119404	0	0.0116959	0	0	0.0111471	0.00014736	0	0	0	0	0.00054542	0.00027867	0	0	0	0	4.177e-05	0.00100553	1.146e-05	0.00010329	0.00045721	0	0	0	0	0.00147446	0.00039452	0.00434783
CASSQGRGSYEQYF	0.0100353	27	7.155e-05	4.07e-05	3.349e-05	8.989e-05	0	5.6212e-06		0	0	0	0	3.808e-05	0.00020854	0	0	0	0	5.102e-05	4.342e-05	0	0	0	0	1.704e-05	5.526e-05	0	0	0.00358423	0	5.642e-05	0.00022061	0	0	0	0	0.00010443	1.796e-05	2.292e-05	2.951e-05	3.976e-05	0	0	0	0	7.927e-05	5.48e-05	0.00434783
CASSQGLAGARSYEQYF	0.015591	26	5.11e-05	2.907e-05	3.349e-05	4.903e-05	0	0		0	0	0	0	0.00041888	4.171e-05	0.002849	0	0	0	0.00034015	0	0	0	0	0	0.00023862	0	0	0	0	0	7.523e-05	1.161e-05	0	0	0	0	2.089e-05	3.591e-05	6.876e-05	0.00035412	0.00021867	0	0	0	0	4.756e-05	2.192e-05	0.00434783
CASSPGQVSPLHF	0.0107467	25	6.132e-05	2.907e-05	5.358e-05	4.086e-05	2.45652e-05	5.6212e-06		0	0	0	0	0	4.171e-05	0	0	0	0	3.401e-05	2.171e-05	0	0	0	0	1.704e-05	1.842e-05	0	0	0	0	5.642e-05	9.289e-05	0	0	0	0	0.00020885	3.591e-05	4.584e-05	0	3.976e-05	0	0.00460829	0	0	0.00065003	1.096e-05	0.00434783
CSATSQGVGQPQHF	0.00499689	22	4.088e-05	2.326e-05	6.7e-06	5.72e-05	0.000122826	0.000163015		0	0	0	0	0	2.085e-05	0	0	0	0	1.701e-05	4.342e-05	0	0	0	0	1.704e-05	7.368e-05	0	0	0	0	1.881e-05	3.483e-05	0	0	0	0	0	3.591e-05	4.584e-05	0	0	0	0	0	0	1.585e-05	4.384e-05	0.00434783
CASSLQGAYEQYF	0.00637395	21	4.088e-05	4.07e-05	3.349e-05	4.903e-05	0	1.68636e-05		0	0	0	0	1.904e-05	2.085e-05	0	0	0	0	1.701e-05	2.171e-05	0	0	0	0	0	3.684e-05	0	0	0	0	0	4.645e-05	0	0	0	0	0	1.796e-05	4.584e-05	2.951e-05	5.964e-05	0	0	0	0	0	3.288e-05	0.00434783
CASSQDGQSSYEQYF	0.00465217	16	3.066e-05	2.326e-05	6.7e-06	8.17e-06	0	0		0	0	0	0	1.904e-05	1.043e-05	0	0	0	0	0	2.171e-05	0	0	0	0	0	0	0	0	0	0	1.881e-05	1.161e-05	0	0	0	0	4.177e-05	1.796e-05	2.292e-05	0	0	0	0	0	0	0	1.096e-05	0.00434783
CASSLGLAVYNEQFF	0.0198436	13	1.022e-05	5.81e-06	1.339e-05	0	1.22826e-05	1.12424e-05		0	0	0	0	3.808e-05	0.00029196	0	0	0	0	1.701e-05	0	0	0	0	0	0	0	0	0	0	0	0	0	0	0	0	0	0.00363401	0	2.292e-05	0.00032461	0.00811053	0	0	0	0	0	0	0.00434783
CASSPPGQIHYEQYF	0.00468759	12	2.044e-05	5.81e-06	1.339e-05	1.634e-05	1.22826e-05	0		0	0	0	0	0	1.043e-05	0	0	0	0	1.701e-05	0	0	0	0	0	0	0	0	0	0	0	0	0	0	0	0	0	0	0	0	1.476e-05	0	0	0	0	0	1.585e-05	0	0.00434783
CASSLDGWAMNTEAFF	0.00448847	9	2.044e-05	1.163e-05	2.009e-05	1.634e-05	0	0		0	0	0	0	0	0	0	0	0	0	1.701e-05	0	0	0	0	0	0	0	0	0	0	0	1.881e-05	0	0	0	0	0	2.089e-05	0	0	0	0	0	0	0	0	0	0	0.00434783
CASSSYRDSSSEQYF	0.00444642	8	0	5.81e-06	6.7e-06	1.634e-05	1.22826e-05	5.6212e-06		0	0	0	0	0	0	0	0	0	0	1.701e-05	0	0	0	0	0	1.704e-05	0	0	0	0	0	0	0	0	0	0	0	0	0	0	0	1.988e-05	0	0	0	0	0	0	0.00434783
CSATYNEQFF	0.00440054	6	1.022e-05	5.81e-06	0	8.17e-06	0	0		0	0	0	0	0	0	0	0	0	0	0	0	0	0	0	0	1.704e-05	0	0	0	0	0	0	0	0	0	0	0	0	0	1.146e-05	0	0	0	0	0	0	0	0	0.00434783
CASSERAGPNTDTQYF	0.0149824	6	0	0	0	0	0	0		0	0	0	0	0	0	0	0	0	0	8.504e-05	0	0	0	0	0	0	0	0	0	0	0	0	0	0	0	0	0	0	0	0	0.00060496	0	0	0	0	0	0	0	0.00434783
CASSLINSPLHF	0.0044142	5	0	1.744e-05	0	8.17e-06	0	0		0	0	0	0	0	0	0	0	0	0	0	0	0	0	0	0	1.704e-05	0	0	0	0	0	0	0	0	0	0	0	0	0	0	0	0	0	0	0	0	0	0	0.00434783
CASSLDRFEGYEQYF	0.00440615	5	0	0	0	8.17e-06	0	0		0	0	0	0	0	0	0	0	0	0	0	0	0	0	0	0	0	1.842e-05	0	0	0	0	0	0	0	0	0	0	0	0	0	0	1.988e-05	0	0	0	0	0	0	0.00434783
CASSSQGGAPLHF	0.00438782	4	0	0	0	8.17e-06	0	2.8106e-05		0	0	0	0	0	0	0	0	0	0	0	0	0	0	0	0	0	0	0	0	0	0	0	0	0	0	0	0	0	0	0	0	0	0	0	0	0	0	0	0.00434783
CASSLAVGDPRGEQFF	0.0402134	3	0	0	0	0	0	0		0	0	0	0	0	0	0	0	0	0	0	0	0	0	0	0	0	0	0	0	0	0	0	0	0	0	0	0	0	0	0	0	0	0	0	0	0	0	0	0.00434783
CASSVSSNTGELFF	0.00435364	2	0	5.81e-06	0	0	0	5.6212e-06		0	0	0	0	0	0	0	0	0	0	0	0	0	0	0	0	0	0	0	0	0	0	0	0	0	0	0	0	0	0	0	0	0	0	0	0	0	0	0	0.00434783
CASSSQAELYGYTF	0.0263761	2	0	0	0	0	0	0		0	0	0	0	0	0	0	0	0	0	0	0	0	0	0	0	0	0	0	0	0	0	0	0	0	0	0	0	0	0	0	0	0	0	0	0	0	0	0	0.00434783
CASSLRGYNEKLFF	0.00436483	2	0	0	0	0	0	0		0	0	0	0	0	0	0	0	0	0	1.701e-05	0	0	0	0	0	0	0	0	0	0	0	0	0	0	0	0	0	0	0	0	0	0	0	0	0	0	0	0	0.00434783
CASSHAHSANYGYTF	0.0259111	2	0	0	0	0	0	0		0	0	0	0	0	0	0	0	0	0	0	0	0	0	0	0	0	0	0	0	0	0	0	0	0	0	0	0	0	0	0	0	0	0	0	0	0	0	0	0.00434783
CASSEGLTSGRRYEQYF	0.00457309	2	0	0	0	0	0	0		0	0	0	0	0	0	0	0	0	0	0	0	0	0	0	0	0	0	0	0	0	0	0	0	0	0	0	0	0	0	0	0	0	0	0	0	0	0	0	0.00434783
CASLFVAGVQETQYF	0.00674272	2	0	0	0	0	0	0		0	0	0	0	0	0	0	0	0	0	0	0	0	0	0	0	0	0	0	0	0	0	0	0	0	0	0	0	0	0	0	0	0	0	0	0	0	0	0	0.00434783
CASGEANYGYTF	0.0116797	2	0	0	0	0	0	0		0	0	0	0	0	0	0	0	0	0	0	0	0	0	0	0	0	0	0	0	0	0	0	0	0	0	0	0	0	0	0	0	0	0	0	0	0	0	0	0.00434783
CSTGGVNSNQPQHF	0.00434783	1	0	0	0	0	0	0		0	0	0	0	0	0	0	0	0	0	0	0	0	0	0	0	0	0	0	0	0	0	0	0	0	0	0	0	0	0	0	0	0	0	0	0	0	0	0	0.00434783
CSASMGAKSGYTF	0.00434783	1	0	0	0	0	0	0		0	0	0	0	0	0	0	0	0	0	0	0	0	0	0	0	0	0	0	0	0	0	0	0	0	0	0	0	0	0	0	0	0	0	0	0	0	0	0	0.00434783
CASRLSRVDPQHF	0.00434783	1	0	0	0	0	0	0		0	0	0	0	0	0	0	0	0	0	0	0	0	0	0	0	0	0	0	0	0	0	0	0	0	0	0	0	0	0	0	0	0	0	0	0	0	0	0	0.00434783
CASNAGKTGELFF	0.00434783	1	0	0	0	0	0	0		0	0	0	0	0	0	0	0	0	0	0	0	0	0	0	0	0	0	0	0	0	0	0	0	0	0	0	0	0	0	0	0	0	0	0	0	0	0	0	0.00434783
CASADVWGQPQHF	0.00434783	1	0	0	0	0	0	0		0	0	0	0	0	0	0	0	0	0	0	0	0	0	0	0	0	0	0	0	0	0	0	0	0	0	0	0	0	0	0	0	0	0	0	0	0	0	0	0.00434783
CASSPVLQRGNTIYF	0.917768	40	0.00022486	0.00012211	0.00014734	6.538e-05	4.91304e-05	6.74544e-05		0.00389105	0.0130435	0.00549451	0.00881057	0.011881	0.0904238	0.002849	0.00675676	0	0	0.0130957	0.0503886	0	0	0.00442478	0	0.00412477	0.0237437	0	0	0	0	0.00660147	0.0055502	0	0	0	0	0.188885	0.0320333	0.0139468	0.00280348	0.00534738	0.00740741	0.00460829	0.00704225	0	0.0991534	0.0169207	0.00217391
CASSLGLAGDTQYF	0.308127	46	2.044e-05	1.744e-05	6.7e-06	2.452e-05	2.45652e-05	2.8106e-05		0	0	0.00274725	0.0132159	0.00375088	0.00402486	0	0.00675676	0	0	0.00882683	0.00091181	0	0.00292398	0.00442478	0	8.522e-05	0.00501032	0.00308642	0	0	0	0.00648862	0.00481869	0.00228311	0.00103734	0	0.00392157	0.00091894	0.0184048	0.00872106	0.0148289	0.0199185	0.00740741	0.0138249	0.00704225	0	0.0254146	0.00943572	0.00217391
CASSVTRRRQNTEAFF	0.100055	35	0	5.81e-06	0	0	0	0		0	0	0	0	0.00182784	0.00186645	0	0.00675676	0	0	5.102e-05	0.00091181	0	0	0.00442478	0	0.00020453	0.00071839	0.00617284	0.00446429	0	0	0.00457025	0.0058521	0.00228311	0	0	0	0.00029239	0.00100553	0.00421728	0.00981217	0.00039757	0.00246914	0.00460829	0	0	0.00057076	0.00656446	0.00217391
CSVVTNYRGLEQYF	0.0724108	30	3.066e-05	1.163e-05	2.679e-05	1.634e-05	0	1.12424e-05		0	0	0	0	1.904e-05	0.00029196	0	0	0	0	0.00081635	0	0	0	0	0	0	9.21e-05	0	0	0	0	0.00020688	0.00019739	0.00228311	0	0	0	0.00058478	5.387e-05	0.00030942	0.00028035	0.00385648	0.00246914	0.0230415	0	0	0.00394774	0.00825215	0.00217391
CASSVSGTQETQYF	0.124856	35	1.022e-05	3.489e-05	2.679e-05	1.634e-05	0	1.12424e-05		0	0	0.00274725	0	0.00205632	0.00093844	0.00569801	0.00675676	0	0	0.00146263	0.00864053	0	0	0	0	0.001534	0.00016578	0	0	0	0	0.00020688	0.00042962	0.00228311	0	0	0	0.00075186	0.00064641	0.00187944	0.00120992	0.0107942	0.00246914	0.00921659	0	0	0.00860894	0.00386854	0.00217391
CASSLRGGELFF	0.117581	31	2.044e-05	0	6.7e-06	8.17e-06	0	0		0	0	0	0	0.00232288	0.00175175	0.002849	0.0135135	0.0021692	0	0.00311235	0.00010855	0	0.00292398	0	0	0.00293165	0	0.00308642	0.00446429	0	0	0.00026331	0.0025661	0	0	0	0.00392157	0.00156638	0	0.00224616	0.0137518	0	0.00493827	0	0	0	0	0.00316716	0.00217391
CAISESGTGVTGELFF	0.0556181	31	0	0	6.7e-06	8.17e-06	0	0		0	0	0	0.00440529	9.52e-05	0.00010427	0	0	0	0	0.00056124	0.00015197	0	0	0	0	0.00064769	1.842e-05	0	0.00446429	0	0.00363636	0.00227572	0.00011611	0.00684932	0	0	0.00392157	8.354e-05	0.00691302	0.00020628	0.0001328	0.00013915	0	0	0	0	0.00026952	0.00036165	0.00217391
CASSEAEGTEAFF	0.0974841	32	1.022e-05	0	6.7e-06	8.17e-06	0	0		0	0	0	0	3.808e-05	0.00018769	0.002849	0	0	0	0.00374162	0.0002171	0	0	0	0	0.00042611	0.00011052	0.00617284	0	0	0	0	0.00426135	0.00456621	0	0	0.00392157	4.177e-05	0.00220858	0.00598212	0	0.0054269	0	0.00460829	0	0	0.00599296	0.00111782	0.00217391
CSGRRGVTDTQYF	0.0181678	29	3.066e-05	1.744e-05	1.339e-05	3.269e-05	1.22826e-05	1.68636e-05		0	0	0	0	0.00024752	0.00067776	0	0	0	0	0.00027212	0.00093352	0	0	0	0	0.00027271	0.00036841	0	0	0	0	0.00035734	0.00022061	0.00456621	0	0	0.00392157	0.00050124	0.00014365	0.00020628	0.00010329	0.00041745	0	0	0	0	0.00039636	0.00041644	0.00217391
CASSLPGSSYEQYF	0.00679388	6	1.022e-05	5.81e-06	0	0	0	0		0	0	0	0	0	0	0	0	0	0	0	0	0	0	0	0	0	0	0	0	0	0	0	0	0.00456621	0	0	0	0	0	0	0	0	0	0	0	0	0	2.192e-05	0.00217391
CASSKGTSGRSQDTQYF	0.169164	39	0	0	0	8.17e-06	0	0		0	0	0.00274725	0.00440529	0.00365568	0.00331582	0.00569801	0.00675676	0	0	0.00649682	0.00058617	0	0.00292398	0.00442478	0	0.00117607	0.0110338	0.00617284	0.00446429	0	0	0.00208764	0.00610754	0.00228311	0	0	0	0.00843758	0.00154421	0.00192528	0.00638897	0.00709671	0.00246914	0	0.00704225	0	0.00418556	0.00216989	0.00217391
CASSKLSLAVPYNEQFF	0.0253112	30	1.022e-05	1.744e-05	6.7e-06	8.17e-06	1.22826e-05	1.12424e-05		0	0	0	0	0.00043792	0.00030239	0.002849	0	0	0	0.00403075	0.00054275	0	0	0	0	0.00034089	0.00016578	0	0	0	0	0.00120369	0.00182297	0.00228311	0	0	0	0.00018797	0.00030525	0.00014898	0.0002951	0.00053673	0	0.00460829	0	0	0.00025367	0.00016439	0.00217391
CASSQDFPLAGVETQYF	0.00552796	24	2.044e-05	2.907e-05	1.339e-05	3.269e-05	0	0		0	0	0	0	3.808e-05	9.384e-05	0	0	0	0	5.102e-05	0	0	0	0	0	6.818e-05	0.00011052	0	0	0	0	5.642e-05	2.322e-05	0.00228311	0	0	0	0	7.182e-05	5.73e-05	5.902e-05	5.964e-05	0	0	0	0	1.585e-05	1.096e-05	0.00217391
CASRPAGEWEFF	0.0107001	7	0	0	0	0	0	0		0	0	0	0	0	0	0	0	0	0	0	0	0	0.00292398	0	0	0.00068178	0	0	0	0	0	0	0	0.00228311	0	0	0	0	0.00082597	0	0	0	0	0	0	0	0.00045978	0	0.00217391
CASSQDRGRGTDTQYF	0.085276	33	0	0	0	0	0	0		0	0	0	0	0.00091392	0.00305514	0.00569801	0	0	0	6.803e-05	0.0011072	0	0	0	0	0.00148287	0.00016578	0.00308642	0.00446429	0	0	0.00660147	0.00153269	0	0.00103734	0	0.00392157	0.0001462	1.796e-05	0.00144396	0.00020657	0.00419441	0.00493827	0.00460829	0	0	0.00588198	0.00292606	0.00217391
CASSSHNVDTQYF	0.0339568	8	0	0	6.7e-06	8.17e-06	4.91304e-05	1.12424e-05		0	0	0	0	0	0	0	0	0	0	0	0	0	0	0	0	0	0	0	0	0	0	0	0	0	0	0	0	0	0	0	0	0	0	0	0	0	0	0	0.00217391
CASSPGGTDTQYF	0.00266421	11	1.022e-05	1.163e-05	0	3.269e-05	1.22826e-05	1.12424e-05		0	0	0	0	3.808e-05	0	0	0	0	0	0	0	0	0	0	0	0	3.684e-05	0	0	0	0	0	0	0	0	0	0	0	1.796e-05	2.292e-05	0	0	0	0	0	0	0	0	0.00217391
CASSQVGTNNYGYTF	0.0554166	4	0	0	0	0	0	0		0	0	0	0	0	0	0	0	0	0	0	0	0	0	0	0	0	0	0	0	0	0	0	0	0	0	0	0	0	0	0	0	0	0	0	0	0	0	0	0.00217391
CASSAGWEKLFF	0.0111653	5	0	0	0	0	0	0		0	0	0	0	0	0	0	0	0	0	0	0	0	0	0	0	0	0.00012894	0	0	0	0	0	0	0	0	0	0	0	0	0	0	9.939e-05	0	0	0	0	0	0	0.00217391
CASSGLTGGNYEQYF	0.00746892	28	8.177e-05	5.233e-05	4.018e-05	0.00010624	1.22826e-05	1.12424e-05		0	0	0	0	5.712e-05	4.171e-05	0	0	0	0	6.803e-05	4.342e-05	0	0	0	0	3.409e-05	9.21e-05	0	0	0	0.00363636	7.523e-05	0.00011611	0	0	0	0	0.00010443	5.387e-05	4.584e-05	4.427e-05	5.964e-05	0	0	0	0	3.171e-05	0.00014247	0.00217391
CASSFPGAVGYTF	0.0980011	28	2.044e-05	0	0	8.17e-06	0	1.12424e-05		0	0	0	0	0.00049504	0.00031281	0.002849	0	0	0	0.00219395	0.00590508	0	0	0	0	0.00313619	0	0.00308642	0	0	0	0.0017303	0.00300733	0	0	0	0.00392157	0	0.00037707	0.00346092	0.00025084	0.00554617	0.00246914	0.0138249	0	0	0.0118749	0.00280551	0.00217391
CASSGGVHEAKNIQYF	0.00399351	27	2.044e-05	1.744e-05	6.7e-06	1.634e-05	0	5.6212e-06		0	0	0	0	3.808e-05	5.214e-05	0	0	0	0	5.102e-05	6.513e-05	0	0	0	0	5.113e-05	7.368e-05	0	0	0	0	3.762e-05	6.967e-05	0	0	0	0	0.00035505	8.978e-05	6.876e-05	1.476e-05	7.951e-05	0	0	0	0	4.756e-05	5.48e-05	0.00217391
CSARGQLNLAKNIQYF	0.016957	26	1.022e-05	5.81e-06	6.7e-06	0	1.22826e-05	5.6212e-06		0	0	0.00274725	0	0.00015232	0.00020854	0	0	0	0	3.401e-05	0.00049933	0	0	0	0	5.113e-05	3.684e-05	0	0	0	0	0.00035734	1.161e-05	0	0	0	0	6.266e-05	5.387e-05	1.146e-05	0.00194768	0.00367757	0	0	0	0	0	4.384e-05	0.00217391
CASSTLANTEAFF	0.00323931	26	1.022e-05	2.907e-05	4.688e-05	2.452e-05	0	3.93484e-05		0	0	0	0	0	1.043e-05	0	0	0	0	3.401e-05	6.513e-05	0	0	0	0	1.704e-05	1.842e-05	0	0	0	0	3.762e-05	2.322e-05	0	0	0	0	6.266e-05	5.387e-05	0	4.427e-05	3.976e-05	0	0	0	0	7.927e-05	4.384e-05	0.00217391
CASSLYESEELFF	0.00335761	26	6.132e-05	3.489e-05	4.018e-05	5.72e-05	0	1.68636e-05		0	0	0	0	1.904e-05	3.128e-05	0	0	0	0	3.401e-05	2.171e-05	0	0	0	0	6.818e-05	3.684e-05	0	0	0	0	1.881e-05	3.483e-05	0	0	0	0	0.00018797	5.387e-05	4.584e-05	1.476e-05	1.988e-05	0	0	0	0	3.171e-05	2.192e-05	0.00217391
CASSLSPTVSYEQYF	0.00634615	26	6.132e-05	4.07e-05	3.349e-05	4.903e-05	0	5.6212e-06		0	0	0	0	3.808e-05	6.256e-05	0	0	0	0	3.401e-05	6.513e-05	0	0	0	0	1.704e-05	0	0.00308642	0	0	0	7.523e-05	1.161e-05	0	0	0	0	0.00012531	1.796e-05	4.584e-05	4.427e-05	5.964e-05	0	0	0	0	6.342e-05	4.384e-05	0.00217391
CASSFPSLETYNEQFF	0.00307505	26	3.066e-05	3.489e-05	3.349e-05	4.903e-05	1.22826e-05	0		0	0	0	0	3.808e-05	2.085e-05	0	0	0	0	6.803e-05	4.342e-05	0	0	0	0	3.409e-05	1.842e-05	0	0	0	0	1.881e-05	1.161e-05	0	0	0	0	2.089e-05	1.796e-05	2.292e-05	2.951e-05	1.988e-05	0	0	0	0	0.00014269	2.192e-05	0.00217391
CASSQEVRGRTDTQYF	0.00308163	25	6.132e-05	4.07e-05	2.009e-05	4.903e-05	0	5.6212e-06		0	0	0	0	1.904e-05	2.085e-05	0	0	0	0	5.102e-05	6.513e-05	0	0	0	0	8.522e-05	3.684e-05	0	0	0	0	1.881e-05	2.322e-05	0	0	0	0	0	3.591e-05	6.876e-05	1.476e-05	9.939e-05	0	0	0	0	3.171e-05	1.096e-05	0.00217391
CASSPSTGVSNQPQHF	0.00338639	24	1.022e-05	2.907e-05	1.339e-05	4.903e-05	2.45652e-05	0		0	0	0	0	3.808e-05	2.085e-05	0	0	0	0	6.803e-05	0.00015197	0	0	0	0	1.704e-05	0.00011052	0	0	0	0	1.881e-05	2.322e-05	0	0	0	0	6.266e-05	3.591e-05	6.876e-05	2.951e-05	5.964e-05	0	0	0	0	0.00023782	1.096e-05	0.00217391
CASSPEPGLAGPF	0.00266503	24	1.022e-05	1.744e-05	2.679e-05	8.17e-06	0	5.6212e-06		0	0	0	0	1.904e-05	1.043e-05	0	0	0	0	1.701e-05	0	0	0	0	0	1.704e-05	3.684e-05	0	0	0	0	1.881e-05	1.161e-05	0	0	0	0	4.177e-05	1.796e-05	2.292e-05	0	3.976e-05	0	0	0	0	1.585e-05	2.192e-05	0.00217391
CASSGYRTGLTLGRETQYF	0.00889103	24	5.11e-05	1.744e-05	2.679e-05	2.452e-05	0	5.6212e-06		0	0	0	0	0	3.128e-05	0	0	0	0	1.701e-05	2.171e-05	0	0	0	0	3.409e-05	0	0	0.00446429	0	0	3.762e-05	2.322e-05	0	0	0	0	2.089e-05	1.796e-05	2.292e-05	0	1.988e-05	0	0	0	0	0	1.096e-05	0.00217391
CSAPSGGKETQYF	0.00528433	23	1.022e-05	5.81e-06	1.339e-05	8.17e-06	2.45652e-05	1.12424e-05		0	0	0	0	1.904e-05	2.085e-05	0	0	0	0	5.102e-05	0	0	0	0	0	3.409e-05	0	0	0	0	0	0	2.322e-05	0	0	0	0	0.0001462	1.796e-05	1.146e-05	1.476e-05	0	0	0	0	0	0.00011098	0.00038357	0.00217391
CASSLPGQGRTEAFF	0.00365911	23	5.11e-05	5.233e-05	7.367e-05	4.903e-05	0	0		0	0	0	0	9.52e-05	2.085e-05	0	0	0	0	0.00010204	0	0	0	0	0	5.113e-05	1.842e-05	0	0	0	0	7.523e-05	2.322e-05	0	0	0	0	2.089e-05	3.591e-05	3.438e-05	4.427e-05	0	0	0	0	0	0.00045978	6.575e-05	0.00217391
CASSLGQGNTEAFF	0.00306837	23	5.11e-05	8.141e-05	8.037e-05	6.538e-05	0	2.24848e-05		0	0	0	0	0	4.171e-05	0	0	0	0	5.102e-05	4.342e-05	0	0	0	0	5.113e-05	3.684e-05	0	0	0	0	1.881e-05	6.967e-05	0	0	0	0	0	0	1.146e-05	2.951e-05	1.988e-05	0	0	0	0	1.585e-05	1.096e-05	0.00217391
CASSGGSYNEQFF	0.00550115	23	8.177e-05	2.907e-05	2.679e-05	1.634e-05	0	0		0	0	0	0	1.904e-05	2.085e-05	0	0	0	0	1.701e-05	4.342e-05	0	0	0	0	0	3.684e-05	0	0	0	0	7.523e-05	1.161e-05	0	0	0	0	0	1.796e-05	2.292e-05	1.476e-05	1.988e-05	0	0	0	0	0	0.00028493	0.00217391
CASSLAGTSGAYEQYF	0.00657305	22	1.022e-05	1.163e-05	2.679e-05	5.72e-05	0	0		0	0	0	0	1.904e-05	2.085e-05	0	0	0	0	1.701e-05	0	0	0	0	0	0	0	0	0	0	0	1.881e-05	4.645e-05	0	0	0	0.00392157	0	1.796e-05	2.292e-05	1.476e-05	1.988e-05	0	0	0	0	3.171e-05	3.288e-05	0.00217391
CSAPLRTGSYNEQFF	0.0028248	21	3.066e-05	5.81e-06	4.018e-05	3.269e-05	1.22826e-05	5.6212e-06		0	0	0	0	5.712e-05	3.128e-05	0	0	0	0	0	4.342e-05	0	0	0	0	3.409e-05	0	0	0	0	0	3.762e-05	3.483e-05	0	0	0	0	0	7.182e-05	3.438e-05	0	1.988e-05	0	0	0	0	1.585e-05	2.192e-05	0.00217391
CASSPGTENSGANVLTF	0.00763811	21	4.088e-05	5.81e-06	6.7e-06	3.269e-05	0	1.12424e-05		0	0	0	0.00440529	0	0	0	0	0	0	1.701e-05	8.684e-05	0	0	0	0	1.704e-05	0	0	0	0	0	0.00015046	0	0	0	0	0	0.00010443	3.591e-05	6.876e-05	2.951e-05	0.00015903	0	0	0	0	0	0	0.00217391
CASRVFDRGHSGANVLTF	0.00273017	21	4.088e-05	5.81e-06	1.339e-05	1.634e-05	0	5.6212e-06		0	0	0	0	3.808e-05	2.085e-05	0	0	0	0	0	2.171e-05	0	0	0	0	3.409e-05	5.526e-05	0	0	0	0	3.762e-05	2.322e-05	0	0	0	0	6.266e-05	0	0	0	1.988e-05	0	0	0	0	1.585e-05	2.192e-05	0.00217391
CASSQDPLAIGTGELFF	0.00266808	20	5.11e-05	3.489e-05	2.679e-05	2.452e-05	0	0		0	0	0	0	0	0	0	0	0	0	1.701e-05	2.171e-05	0	0	0	0	0	1.842e-05	0	0	0	0	5.642e-05	1.161e-05	0	0	0	0	0	1.796e-05	1.146e-05	5.902e-05	0	0	0	0	0	0	1.096e-05	0.00217391
CASSLAGGYNEQFF	0.00646748	20	2.044e-05	3.489e-05	2.679e-05	5.72e-05	2.45652e-05	1.12424e-05		0	0	0	0	3.808e-05	3.128e-05	0	0	0	0	0	0	0	0	0	0	6.818e-05	0	0	0	0	0	1.881e-05	1.161e-05	0	0	0	0	2.089e-05	1.796e-05	3.438e-05	0	7.951e-05	0	0	0	0	1.585e-05	0	0.00217391
CASSGGLGLSTDTQYF	0.00515609	20	0	5.81e-06	0	8.17e-06	0	5.6212e-06		0	0	0	0	5.712e-05	0	0	0	0	0	0	4.342e-05	0	0	0	0	3.409e-05	3.684e-05	0	0	0	0	1.881e-05	2.322e-05	0	0	0	0	0	1.796e-05	2.292e-05	1.476e-05	7.951e-05	0	0	0	0	6.342e-05	0	0.00217391
CASSQGEVGYTF	0.00263776	19	1.022e-05	1.163e-05	1.339e-05	1.634e-05	0	0		0	0	0	0	1.904e-05	0	0	0	0	0	1.701e-05	4.342e-05	0	0	0	0	1.704e-05	0	0	0	0	0	0	2.322e-05	0	0	0	0	8.354e-05	3.591e-05	0	2.951e-05	1.988e-05	0	0	0	0	0	0	0.00217391
CASSLVTGESWLYNEQFF	0.00562183	19	2.044e-05	5.81e-06	0	8.17e-06	0	0		0	0	0	0	0	2.085e-05	0	0	0	0	1.701e-05	0	0	0	0	0	6.818e-05	9.21e-05	0	0	0	0	0	1.161e-05	0	0	0	0	0	1.796e-05	1.146e-05	0	3.976e-05	0	0	0	0	0	1.096e-05	0.00217391
CASSLRRLAVYNEQFF	0.00255382	19	1.022e-05	2.907e-05	2.009e-05	2.452e-05	0	0		0	0	0	0	3.808e-05	1.043e-05	0	0	0	0	0	0	0	0	0	0	1.704e-05	0	0	0	0	0	1.881e-05	0	0	0	0	0	4.177e-05	1.796e-05	0	1.476e-05	0	0	0	0	0	0	1.096e-05	0.00217391
CASSLQLADTGELFF	0.00275476	19	2.044e-05	2.907e-05	2.679e-05	8.17e-06	1.22826e-05	5.6212e-06		0	0	0	0	3.808e-05	0	0	0	0	0	3.401e-05	2.171e-05	0	0	0	0	1.704e-05	0	0	0	0	0	0	3.483e-05	0	0	0	0	0.00012531	1.796e-05	4.584e-05	2.951e-05	0	0	0	0	0	3.171e-05	1.096e-05	0.00217391
CASSLPGLSYEQYF	0.00431589	19	1.022e-05	5.81e-06	6.7e-06	0	0	0		0	0	0	0	3.808e-05	1.043e-05	0	0	0	0	0	0.00041249	0	0	0	0	0	0	0	0	0	0	0.00018808	0	0	0	0	0	0	1.796e-05	1.146e-05	4.427e-05	3.976e-05	0	0	0	0	0	2.192e-05	0.00217391
CASSKGGQGRTSGYTF	0.00260194	19	2.044e-05	1.163e-05	6.7e-06	8.17e-06	0	0		0	0	0	0	1.904e-05	1.043e-05	0	0	0	0	1.701e-05	6.513e-05	0	0	0	0	1.704e-05	1.842e-05	0	0	0	0	5.642e-05	3.483e-05	0	0	0	0	2.089e-05	0	1.146e-05	4.427e-05	3.976e-05	0	0	0	0	0	1.096e-05	0.00217391
CASRGAEDQPQHF	0.00283775	19	2.044e-05	3.489e-05	4.018e-05	4.903e-05	1.22826e-05	1.68636e-05		0	0	0	0	1.904e-05	3.128e-05	0	0	0	0	3.401e-05	0	0	0	0	0	0	0	0	0	0	0	0	3.483e-05	0	0	0	0	4.177e-05	0	0	1.476e-05	1.988e-05	0	0	0	0	0	2.192e-05	0.00217391
CASTATGGNSPLHF	0.00298808	18	6.132e-05	2.907e-05	3.349e-05	7.355e-05	3.68478e-05	0		0	0	0	0	0	3.128e-05	0	0	0	0	0	6.513e-05	0	0	0	0	3.409e-05	0	0	0	0	0	7.523e-05	5.806e-05	0	0	0	0	0	5.387e-05	3.438e-05	1.476e-05	7.951e-05	0	0	0	0	3.171e-05	1.096e-05	0.00217391
CASSPTTDAYGYTF	0.107556	17	0	0	0	0	0	0		0	0	0	0	7.616e-05	0	0	0	0	0	0	0	0.0031746	0.00292398	0.00442478	0	0.00598261	1.842e-05	0	0	0	0	0	0.00099857	0	0	0	0	0	0	8.022e-05	0	0.00170957	0.0123457	0.0230415	0	0	0.0403653	0.00815351	0.00217391
CASSANPRDRGEQYF	0.00878749	17	3.066e-05	1.163e-05	1.339e-05	8.17e-06	0	0		0	0	0	0	0	0	0	0	0	0	0	0	0	0	0	0	3.409e-05	0.0001842	0	0	0	0	0	0	0	0	0	0	0	1.796e-05	0	2.951e-05	1.988e-05	0	0	0	0	1.585e-05	3.288e-05	0.00217391
CASSNPGGANVLTF	0.00255613	16	2.044e-05	1.163e-05	4.018e-05	4.903e-05	1.22826e-05	0		0	0	0	0	0	1.043e-05	0	0	0	0	1.701e-05	0	0	0	0	0	3.409e-05	1.842e-05	0	0	0	0	0	3.483e-05	0	0	0	0	0	3.591e-05	1.146e-05	1.476e-05	0	0	0	0	0	0	2.192e-05	0.00217391
CASSYSGSPPKIYEQYF	0.00238112	15	1.022e-05	5.81e-06	1.339e-05	2.452e-05	0	0		0	0	0	0	0	1.043e-05	0	0	0	0	0	0	0	0	0	0	1.704e-05	1.842e-05	0	0	0	0	0	1.161e-05	0	0	0	0	0	0	2.292e-05	0	1.988e-05	0	0	0	0	1.585e-05	1.096e-05	0.00217391
CASSLEVGGEQFF	0.00306457	15	1.022e-05	2.326e-05	1.339e-05	8.17e-06	0	0		0	0	0	0	1.904e-05	2.085e-05	0	0	0	0	0	0	0	0	0	0	0	0	0	0	0	0	1.881e-05	1.161e-05	0	0	0	0	2.089e-05	1.796e-05	0	0	0	0	0	0	0	1.585e-05	0	0.00217391
CASSVVGGAGSSEQFF	0.00239129	14	1.022e-05	2.326e-05	2.009e-05	8.17e-06	0	0		0	0	0	0	1.904e-05	1.043e-05	0	0	0	0	1.701e-05	0	0	0	0	0	0	0	0	0	0	0	3.762e-05	1.161e-05	0	0	0	0	0	0	0	0	0	0	0	0	0	0	1.096e-05	0.00217391
CASSRDRGANYGYTF	0.00240204	14	1.022e-05	1.163e-05	0	1.634e-05	0	0		0	0	0	0	0	1.043e-05	0	0	0	0	0	2.171e-05	0	0	0	0	3.409e-05	0	0	0	0	0	0	1.161e-05	0	0	0	0	0	0	3.438e-05	0	0	0	0	0	0	0	1.096e-05	0.00217391
CASGSGREAYNEQFF	0.00244059	14	5.11e-05	5.81e-06	6.7e-06	2.452e-05	2.45652e-05	5.6212e-06		0	0	0	0	0	1.043e-05	0	0	0	0	0	0	0	0	0	0	0	0	0	0	0	0	5.642e-05	1.161e-05	0	0	0	0	0	0	1.146e-05	0	0	0	0	0	0	1.585e-05	1.096e-05	0.00217391
CASSTLGGTAGNYGYTF	0.00274935	13	3.066e-05	1.744e-05	6.7e-06	8.17e-06	0	0		0	0	0	0	0	1.043e-05	0	0	0	0	0	0	0	0	0	0	0	7.368e-05	0	0	0	0	0	2.322e-05	0	0	0	0	0	0	0	1.476e-05	0	0	0	0	0	1.585e-05	0	0.00217391
CASSLETSGGGSYNEQFF	0.00240563	13	4.088e-05	1.744e-05	2.679e-05	1.634e-05	0	0		0	0	0	0	1.904e-05	0	0	0	0	0	1.701e-05	0	0	0	0	0	0	0	0	0	0	0	0	1.161e-05	0	0	0	0	0	0	0	0	1.988e-05	0	0	0	0	1.585e-05	1.096e-05	0.00217391
CSAYQRLGSLHF	0.00250108	12	1.022e-05	0	0	0	0	0		0	0	0	0	1.904e-05	0	0	0	0	0	0	2.171e-05	0	0	0	0	1.704e-05	3.684e-05	0	0	0	0	1.881e-05	0	0	0	0	0	4.177e-05	1.796e-05	0	0	1.988e-05	0	0	0	0	1.585e-05	0	0.00217391
CSAGGTSGIVNEQFF	0.00234424	12	1.022e-05	5.81e-06	0	0	1.22826e-05	0		0	0	0	0	0	1.043e-05	0	0	0	0	0	0	0	0	0	0	0	0	0	0	0	0	1.881e-05	1.161e-05	0	0	0	0	0	1.796e-05	3.438e-05	1.476e-05	0	0	0	0	0	0	1.096e-05	0.00217391
CASSLWGGGSTDTQYF	0.00235785	12	1.022e-05	1.163e-05	6.7e-06	8.17e-06	0	0		0	0	0	0	0	0	0	0	0	0	3.401e-05	0	0	0	0	0	0	1.842e-05	0	0	0	0	0	0	0	0	0	0	0	0	1.146e-05	1.476e-05	0	0	0	0	0	0	0	0.00217391
CASSLVDTQYF	0.00232737	12	1.022e-05	1.163e-05	6.7e-06	0	0	0		0	0	0	0	1.904e-05	1.043e-05	0	0	0	0	0	0	0	0	0	0	1.704e-05	0	0	0	0	0	0	0	0	0	0	0	0	1.796e-05	0	0	0	0	0	0	0	1.585e-05	0	0.00217391
CATSRDSGFNGYTF	0.00228861	11	1.022e-05	5.81e-06	6.7e-06	8.17e-06	0	0		0	0	0	0	0	1.043e-05	0	0	0	0	0	0	0	0	0	0	1.704e-05	0	0	0	0	0	0	0	0	0	0	0	0	0	1.146e-05	0	0	0	0	0	0	1.585e-05	0	0.00217391
CASSYRGSSYNEQFF	0.00256522	11	0	5.81e-06	1.339e-05	1.634e-05	2.45652e-05	2.8106e-05		0	0	0	0	1.904e-05	0	0	0	0	0	5.102e-05	0	0	0	0	0	0	0	0	0	0	0	0	0	0	0	0	0	0	1.796e-05	0	0	0	0	0	0	0	0	0	0.00217391
CASSPPGLGPLHF	0.00246302	11	1.022e-05	0	6.7e-06	8.17e-06	0	0		0	0	0	0	0	0	0	0	0	0	1.701e-05	6.513e-05	0	0	0	0	0	0	0	0	0	0	0	3.483e-05	0	0	0	0	0.00010443	0	0	0	0	0	0	0	0	1.585e-05	1.096e-05	0.00217391
CASSLLWDRGGLFF	0.0147806	11	0	0	0	0	0	0		0	0	0.00274725	0	0.00508368	1.043e-05	0	0	0	0	0	0	0	0	0	0	0	3.684e-05	0	0	0	0	0.00110965	0	0	0	0	0	0	0	0	0	0	0.00246914	0	0	0	0	0.00055891	0.00217391
CASSLLQGSRRGELFF	0.00233544	11	0	1.163e-05	1.339e-05	1.634e-05	1.22826e-05	0		0	0	0	0	0	1.043e-05	0	0	0	0	0	0	0	0	0	0	0	0	0	0	0	0	0	0	0	0	0	0	0	1.796e-05	1.146e-05	2.951e-05	1.988e-05	0	0	0	0	0	1.096e-05	0.00217391
CASSPSETQYF	0.00227324	9	1.022e-05	1.163e-05	6.7e-06	0	0	0		0	0	0	0	0	0	0	0	0	0	0	0	0	0	0	0	0	1.842e-05	0	0	0	0	0	0	0	0	0	0	0	0	1.146e-05	1.476e-05	0	0	0	0	0	0	0	0.00217391
CASSLGTDPNYGYTF	0.00233448	9	1.022e-05	5.81e-06	0	8.17e-06	0	0		0	0	0	0	0	0	0	0	0	0	3.401e-05	0	0	0	0	0	0	0	0	0	0	0	0	0	0	0	0	0	0	0	0	0	0	0	0	0	0	0	0	0.00217391
CASSLARGLDSPLHF	0.0022729	9	0	5.81e-06	6.7e-06	8.17e-06	0	0		0	0	0	0	1.904e-05	0	0	0	0	0	0	0	0	0	0	0	1.704e-05	0	0	0	0	0	0	1.161e-05	0	0	0	0	0	0	0	1.476e-05	0	0	0	0	0	1.585e-05	0	0.00217391
CSAEGLAGKRADTQYF	0.00227228	8	1.022e-05	5.81e-06	0	8.17e-06	0	0		0	0	0	0	0	0	0	0	0	0	0	0	0	0	0	0	0	0	0	0	0	0	0	0	0	0	0	0	0	3.591e-05	0	0	0	0	0	0	0	0	1.096e-05	0.00217391
CASSRDSTDTQYF	0.00228995	8	0	0	6.7e-06	1.634e-05	1.22826e-05	0		0	0	0	0	0	0	0	0	0	0	0	0	0	0	0	0	1.704e-05	0	0	0	0	0	0	0	0	0	0	0	0	1.796e-05	0	0	0	0	0	0	0	0	1.096e-05	0.00217391
CASSQEGKRYNEQFF	0.00229484	8	0	5.81e-06	0	8.17e-06	0	0		0	0	0	0	0	1.043e-05	0	0	0	0	0	0	0	0	0	0	0	0	0	0	0	0	0	0	0	0	0	0	4.177e-05	0	0	0	1.988e-05	0	0	0	0	0	2.192e-05	0.00217391
CASSLVGGLDSPLHF	0.00227362	8	0	1.163e-05	0	8.17e-06	0	0		0	0	0	0	1.904e-05	1.043e-05	0	0	0	0	0	0	0	0	0	0	1.704e-05	0	0	0	0	0	0	0	0	0	0	0	0	1.796e-05	0	0	0	0	0	0	0	0	0	0.00217391
CSAEADLHSYEQYF	0.00232079	7	0	5.81e-06	6.7e-06	0	0	0		0	0	0	0	0	1.043e-05	0	0	0	0	0	2.171e-05	0	0	0	0	0	0	0	0	0	0	0	1.161e-05	0	0	0	0	0	0	0	0	0	0	0	0	0	0	0	0.00217391
CASSTTGQGLGYGYTF	0.00228914	7	0	5.81e-06	0	8.17e-06	0	1.12424e-05		0	0	0	0	0	0	0	0	0	0	0	0	0	0	0	0	0	0	0	0	0	0	0	0	0	0	0	0	0	0	0	1.476e-05	3.976e-05	0	0	0	0	1.585e-05	0	0.00217391
CASSSMTSGRSEQFF	0.00243029	7	1.022e-05	0	6.7e-06	8.17e-06	0	5.6212e-06		0	0	0	0	0	0	0	0	0	0	0	2.171e-05	0	0	0	0	0	0	0	0	0	0	0	0	0	0	0	0	0	0	0	0	1.988e-05	0	0	0	0	0	0	0.00217391
CASSFERSGEQFF	0.00227252	7	1.022e-05	0	0	0	0	0		0	0	0	0	0	0	0	0	0	0	0	2.171e-05	0	0	0	0	1.704e-05	0	0	0	0	0	0	0	0	0	0	0	2.089e-05	0	0	0	0	0	0	0	0	0	0	0.00217391
CASRSFTDTQYF	0.00225463	7	0	5.81e-06	6.7e-06	1.634e-05	0	0		0	0	0	0	0	0	0	0	0	0	0	0	0	0	0	0	0	0	0	0	0	0	0	2.322e-05	0	0	0	0	0	0	0	0	0	0	0	0	0	0	0	0.00217391
CASRGGGAYNEQFF	0.00243036	7	0	5.81e-06	6.7e-06	0	0	0		0	0	0	0	0	1.043e-05	0	0	0	0	0	0	0	0	0	0	1.704e-05	0	0	0	0	0	0	0	0	0	0	0	0	0	0	0	0	0	0	0	0	0	0	0.00217391
CASGLQKNTEAFF	0.00225802	7	2.044e-05	1.163e-05	6.7e-06	0	0	0		0	0	0	0	0	1.043e-05	0	0	0	0	0	2.171e-05	0	0	0	0	0	0	0	0	0	0	0	0	0	0	0	0	0	0	0	0	0	0	0	0	0	0	0	0.00217391
CAISESGTPGHEQYF	0.00228318	7	0	0	6.7e-06	8.17e-06	0	0		0	0	0	0	0	0	0	0	0	0	0	2.171e-05	0	0	0	0	0	1.842e-05	0	0	0	0	0	0	0	0	0	0	0	0	0	0	0	0	0	0	0	0	0	0.00217391
CASSYPGNTEAFF	0.00225738	6	0	5.81e-06	0	8.17e-06	0	0		0	0	0	0	0	0	0	0	0	0	0	2.171e-05	0	0	0	0	0	0	0	0	0	0	0	0	0	0	0	0	0	3.591e-05	0	0	0	0	0	0	0	0	0	0.00217391
CASSQDRQGFRQETQYF	0.00222791	6	0	5.81e-06	1.339e-05	8.17e-06	0	0		0	0	0	0	0	0	0	0	0	0	0	0	0	0	0	0	0	0	0	0	0	0	0	0	0	0	0	0	0	0	0	1.476e-05	0	0	0	0	0	0	0	0.00217391
CASSLTGQETQYF	0.00223808	6	0	5.81e-06	1.339e-05	0	0	0		0	0	0	0	0	0	0	0	0	0	0	0	0	0	0	0	0	0	0	0	0	0	1.881e-05	0	0	0	0	0	0	0	0	0	0	0	0	0	0	0	0	0.00217391
CASSLRGGQETQYF	0.00223561	6	1.022e-05	0	0	8.17e-06	0	0		0	0	0	0	0	0	0	0	0	0	0	0	0	0	0	0	0	0	0	0	0	0	0	0	0	0	0	0	2.089e-05	0	1.146e-05	0	0	0	0	0	0	0	1.096e-05	0.00217391
CASRDGQGVPGELFF	0.00225545	6	0	0	0	0	0	0		0	0	0	0	0	1.043e-05	0	0	0	0	0	0	0	0	0	0	1.704e-05	1.842e-05	0	0	0	0	0	0	0	0	0	0	2.089e-05	0	0	1.476e-05	0	0	0	0	0	0	0	0.00217391
CASKRNIDEQFF	0.00244606	6	2.044e-05	1.744e-05	6.7e-06	8.17e-06	9.82608e-05	1.68636e-05		0	0	0	0	0	0	0	0	0	0	0	0	0	0	0	0	0	0	0	0	0	0	0	0	0	0	0	0	0	0	0	0	0	0	0	0	0	0	0	0.00217391
CSVGGLAKNIQYF	0.0022263	5	2.044e-05	5.81e-06	0	8.17e-06	0	0		0	0	0	0	0	0	0	0	0	0	0	0	0	0	0	0	0	0	0	0	0	0	0	0	0	0	0	0	0	1.796e-05	0	0	0	0	0	0	0	0	0	0.00217391
CASSLVRETQYF	0.00225816	5	0	1.163e-05	0	0	0	5.6212e-06		0	0	0	0	0	2.085e-05	0	0	0	0	0	0	0	0	0	0	0	0	0	0	0	0	0	0	0	0	0	0	0	3.591e-05	0	0	0	0	0	0	0	1.585e-05	0	0.00217391
CASSEAGQGTKTQYF	0.00235133	5	1.022e-05	5.81e-06	0	0	0	0		0	0	0	0	0	0	0	0	0	0	0	0	0	0	0	0	0	0	0	0	0	0	0	0	0	0	0	0	0	0	0	0	0	0	0	0	0	0	0	0.00217391
CSARGAGQGVTRPLHF	0.00237614	4	0	0	0	0	0	0		0	0	0	0	0	0	0	0	0	0	0	0	0	0	0	0	0	0	0	0	0	0	9.404e-05	4.645e-05	0	0	0	0	0	0	0	0	0	0	0	0	0	0	0	0.00217391
CASTLRGEGTEAFF	0.00344633	4	0	0	0	0	0	0		0	0	0	0	0	0	0	0	0	0	3.401e-05	0	0	0	0	0	0	0	0	0	0	0	0	0	0	0	0	0	0	0	0	0	0	0	0	0	0	0	0	0.00217391
CASSSPSGSTYEQYF	0.00220954	4	0	5.81e-06	0	0	0	0		0	0	0	0	0	0	0	0	0	0	0	0	0	0	0	0	0	0	0	0	0	0	0	0	0	0	0	0	0	1.796e-05	0	0	0	0	0	0	0	0	0	0.00217391
CASSSGTGEGQPQHF	0.00220319	4	0	5.81e-06	0	0	0	0		0	0	0	0	0	0	0	0	0	0	0	0	0	0	0	0	0	0	0	0	0	0	0	1.161e-05	0	0	0	0	0	0	0	0	0	0	0	0	0	0	0	0.00217391
CASSLGGRANQPQHF	0.00223704	4	0	0	0	0	0	5.6212e-06		0	0	0	0	0	0	0	0	0	0	0	0	0	0	0	0	0	0	0	0	0	0	0	1.161e-05	0	0	0	0	0	0	0	0	0	0	0	0	0	0	0	0.00217391
CASSDGGARTDTQYF	0.00246708	4	0	5.81e-06	0	0	1.22826e-05	2.24848e-05		0	0	0	0	0	0	0	0	0	0	0	0	0	0	0	0	0	0	0	0	0	0	0	0	0	0	0	0	0	0	0	0	0	0	0	0	0	0	0	0.00217391
RASSLGSSSYNEQFF	0.00754453	3	0	0	0	0	0	0		0	0	0	0	0	0	0	0	0	0	0	0	0	0	0	0	0	0	0	0	0	0	0	0	0	0	0	0	0	0	0	0	0	0	0	0	0	0	0	0.00217391
CSVGTGNTEAFF	0.00219355	3	0	0	0	8.17e-06	0	0		0	0	0	0	0	0	0	0	0	0	0	0	0	0	0	0	0	0	0	0	0	0	0	0	0	0	0	0	0	0	1.146e-05	0	0	0	0	0	0	0	0	0.00217391
CASSYRGNGYTF	0.00917	3	0	0	0	0	0	0		0	0	0	0	0	0	0	0	0	0	0	0	0	0	0	0	0	0	0	0	0	0	0	0	0	0	0	0	0	0	0	0	0	0	0	0	0	0	0	0.00217391
CASSSTGASYNEQFF	0.00942962	3	0	0	0	0	0	0		0	0	0	0	0	0	0	0	0	0	0	0	0	0	0	0	0	0	0	0	0	0	0	0	0	0	0	0	0	0	0	0	0	0	0	0	0	0	0	0.00217391
CASSPYNPTEAFF	0.0193901	3	0	0	0	0	0	0		0	0	0	0	0	0	0	0	0	0	0	0	0	0	0	0	0	0	0	0	0	0	0	0	0	0	0	0	0	0	0	0	0	0	0	0	0	0	0	0.00217391
CASSPTTILNTEAFF	0.00369476	3	0	0	0	8.17e-06	0	0		0	0	0	0	0	0	0	0	0	0	0	0	0	0	0	0	0	0	0	0	0	0	0	0	0	0	0	0	0	0	0	0	0	0	0	0	0	0	0	0.00217391
CASSLTFNSGRTEAFF	0.00220294	3	0	0	0	8.17e-06	0	0		0	0	0	0	0	2.085e-05	0	0	0	0	0	0	0	0	0	0	0	0	0	0	0	0	0	0	0	0	0	0	0	0	0	0	0	0	0	0	0	0	0	0.00217391
CASSLGGAGTEAFF	0.00219605	3	0	0	6.7e-06	0	0	0		0	0	0	0	0	0	0	0	0	0	0	0	0	0	0	0	0	0	0	0	0	0	0	0	0	0	0	0	0	0	0	0	0	0	0	0	0	0	0	0.00217391
CSAEKGSSYNEQFF	0.0028497	2	0	0	0	0	0	0		0	0	0	0	0	0	0	0	0	0	0	0	0	0	0	0	0	0	0	0	0	0	0	0	0	0	0	0	0	0	0	0	0	0	0	0	0	0	0	0.00217391
CATSIDRWANYGYTF	0.00220948	2	0	0	0	0	0	0		0	0	0	0	0	0	0	0	0	0	0	0	0	0	0	0	0	0	0	0	0	0	0	0	0	0	0	0	0	0	0	0	0	0	0	0	0	0	0	0.00217391
CASTRGGRTEQFF	0.00313091	2	0	0	0	0	0	0		0	0	0	0	0	0	0	0	0	0	0	0	0	0	0	0	0	0	0	0	0	0	0	0	0	0	0	0	0	0	0	0	0	0	0	0	0	0	0	0.00217391
CASSYPGDTEAFF	0.00217973	2	0	5.81e-06	0	0	0	0		0	0	0	0	0	0	0	0	0	0	0	0	0	0	0	0	0	0	0	0	0	0	0	0	0	0	0	0	0	0	0	0	0	0	0	0	0	0	0	0.00217391
CASSWTDSYEQYF	0.00218977	2	0	0	0	0	0	0		0	0	0	0	0	0	0	0	0	0	0	0	0	0	0	0	0	0	0	0	0	0	0	0	0	0	0	0	0	0	0	0	0	0	0	0	0	1.585e-05	0	0.00217391
CASSVFAGELFF	0.00346621	2	0	0	0	0	0	0		0	0	0	0	0	0	0	0	0	0	0	0	0	0	0	0	0	0	0	0	0	0	0	0	0	0	0	0	0	0	0	0	0	0	0	0	0	0	0	0.00217391
CASSTYRDWIEYF	0.00239001	2	0	0	0	0	0	0		0	0	0	0	0	0	0	0	0	0	0	0	0	0	0	0	0	0	0	0	0	0	0	0	0	0	0	0	0	0	0	0	0	0	0	0	0	0	0	0.00217391
CASSRDSGNTIYF	0.00219026	2	0	0	0	1.634e-05	0	0		0	0	0	0	0	0	0	0	0	0	0	0	0	0	0	0	0	0	0	0	0	0	0	0	0	0	0	0	0	0	0	0	0	0	0	0	0	0	0	0.00217391
CASSQLGGGAGTDTQYF	0.00220948	2	0	0	0	0	0	0		0	0	0	0	0	0	0	0	0	0	0	0	0	0	0	0	0	0	0	0	0	0	0	0	0	0	0	0	0	0	0	0	0	0	0	0	0	0	0	0.00217391
CASSPRQGLANSPLHF	0.00376376	2	0	0	0	0	0	0		0	0	0	0	0	0	0	0	0	0	0	0	0	0	0	0	0	0	0	0	0	0	0	0	0	0	0	0	0	0	0	0	0	0	0	0	0	0	0	0.00217391
CASSPLATYEQYF	0.00277589	2	0	0	0	0	0	0		0	0	0	0	0	0	0	0	0	0	0	0	0	0	0	0	0	0	0	0	0	0	0	0	0	0	0	0	0	0	0	0	0	0	0	0	0	0	0	0.00217391
CASSNPGQGPAFF	0.00323896	2	0	0	0	0	0	0		0	0	0	0	0	0	0	0	0	0	0	0	0	0	0	0	0	0	0	0	0	0	0	0	0	0	0	0	0	0	0	0	0	0	0	0	0	0	0	0.00217391
CASSLSETALAGSNIQYF	0.00320538	2	0	0	0	0	0	0		0	0	0	0	0	0	0	0	0	0	0	0	0	0	0	0	0	0	0	0	0	0	0	0	0	0	0	0	0	0	0	0	0	0	0	0	0	0	0	0.00217391
CASSLAQVLETQYF	0.00254145	2	0	0	0	0	0	0		0	0	0	0	0	0	0	0	0	0	0	0	0	0	0	0	0	0	0	0	0	0	0	0	0	0	0	0	0	0	0	0	0	0	0	0	0	0	0	0.00217391
CASSKGLIQETQYF	0.00218434	2	0	0	0	0	0	0		0	0	0	0	0	1.043e-05	0	0	0	0	0	0	0	0	0	0	0	0	0	0	0	0	0	0	0	0	0	0	0	0	0	0	0	0	0	0	0	0	0	0.00217391
CASSFQGLGESPLHF	0.00219379	2	0	0	0	0	0	0		0	0	0	0	0	0	0	0	0	0	0	0	0	0	0	0	0	0	0	0	0	0	0	0	0	0	0	0	0	0	0	0	1.988e-05	0	0	0	0	0	0	0.00217391
CASSFGGRTNQPQHF	0.00217973	2	0	5.81e-06	0	0	0	0		0	0	0	0	0	0	0	0	0	0	0	0	0	0	0	0	0	0	0	0	0	0	0	0	0	0	0	0	0	0	0	0	0	0	0	0	0	0	0	0.00217391
CASSDPRQGGDGELFF	0.00447396	2	0	0	0	0	0	0		0	0	0	0	0	0	0	0	0	0	0	0	0	0	0	0	0	0	0	0	0	0	0	0	0	0	0	0	0	0	0	0	0	0	0	0	0	0	0	0.00217391
CASQRDRVHSSGANVLTF	0.00226876	2	0	0	0	0	0	0		0	0	0	0	0	0	0	0	0	0	0	0	0	0	0	0	0	0	0	0	0	0	0	0	0	0	0	0	0	0	0	0	0	0	0	0	0	0	0	0.00217391
CASGSDRLLRNTIYF	0.00247031	2	0	0	0	0	0	0		0	0	0	0	0	0	0	0	0	0	0	0	0	0	0	0	0	0	0	0	0	0	0	0	0	0	0	0	0	0	0	0	0	0	0	0	0	0	0	0.00217391
CAILRAGKNEQFF	0.00422683	2	0	0	0	0	0	0		0	0	0	0	0	0	0	0	0	0	0	0	0	0	0	0	0	0	0	0	0	0	0	0	0	0	0	0	0	0	0	0	0	0	0	0	0	0	0	0.00217391
RASSRGPLIEITDTQYF	0.00217391	1	0	0	0	0	0	0		0	0	0	0	0	0	0	0	0	0	0	0	0	0	0	0	0	0	0	0	0	0	0	0	0	0	0	0	0	0	0	0	0	0	0	0	0	0	0	0.00217391
CSVGSRQGIRRTEAFF	0.00217391	1	0	0	0	0	0	0		0	0	0	0	0	0	0	0	0	0	0	0	0	0	0	0	0	0	0	0	0	0	0	0	0	0	0	0	0	0	0	0	0	0	0	0	0	0	0	0.00217391
CSVGGLGGINGYTF	0.00217391	1	0	0	0	0	0	0		0	0	0	0	0	0	0	0	0	0	0	0	0	0	0	0	0	0	0	0	0	0	0	0	0	0	0	0	0	0	0	0	0	0	0	0	0	0	0	0.00217391
CSSPGVTEAFF	0.00217391	1	0	0	0	0	0	0		0	0	0	0	0	0	0	0	0	0	0	0	0	0	0	0	0	0	0	0	0	0	0	0	0	0	0	0	0	0	0	0	0	0	0	0	0	0	0	0.00217391
CSASSYGNTIYF	0.00217391	1	0	0	0	0	0	0		0	0	0	0	0	0	0	0	0	0	0	0	0	0	0	0	0	0	0	0	0	0	0	0	0	0	0	0	0	0	0	0	0	0	0	0	0	0	0	0.00217391
CSASSRGDPRRGLGETQYF	0.00217391	1	0	0	0	0	0	0		0	0	0	0	0	0	0	0	0	0	0	0	0	0	0	0	0	0	0	0	0	0	0	0	0	0	0	0	0	0	0	0	0	0	0	0	0	0	0	0.00217391
CSARVFRGEGQFDTQYF	0.00217391	1	0	0	0	0	0	0		0	0	0	0	0	0	0	0	0	0	0	0	0	0	0	0	0	0	0	0	0	0	0	0	0	0	0	0	0	0	0	0	0	0	0	0	0	0	0	0.00217391
CSARGSAQGNSPLHF	0.00217391	1	0	0	0	0	0	0		0	0	0	0	0	0	0	0	0	0	0	0	0	0	0	0	0	0	0	0	0	0	0	0	0	0	0	0	0	0	0	0	0	0	0	0	0	0	0	0.00217391
CSARGRRGRRGETQYF	0.00217391	1	0	0	0	0	0	0		0	0	0	0	0	0	0	0	0	0	0	0	0	0	0	0	0	0	0	0	0	0	0	0	0	0	0	0	0	0	0	0	0	0	0	0	0	0	0	0.00217391
CSARGARGDNEKLFF	0.00217391	1	0	0	0	0	0	0		0	0	0	0	0	0	0	0	0	0	0	0	0	0	0	0	0	0	0	0	0	0	0	0	0	0	0	0	0	0	0	0	0	0	0	0	0	0	0	0.00217391
CSAREGPIGAIYF	0.00217391	1	0	0	0	0	0	0		0	0	0	0	0	0	0	0	0	0	0	0	0	0	0	0	0	0	0	0	0	0	0	0	0	0	0	0	0	0	0	0	0	0	0	0	0	0	0	0.00217391
CSAREGAGEKLFF	0.00217391	1	0	0	0	0	0	0		0	0	0	0	0	0	0	0	0	0	0	0	0	0	0	0	0	0	0	0	0	0	0	0	0	0	0	0	0	0	0	0	0	0	0	0	0	0	0	0.00217391
CSARDYGLSPNYGYTF	0.00217391	1	0	0	0	0	0	0		0	0	0	0	0	0	0	0	0	0	0	0	0	0	0	0	0	0	0	0	0	0	0	0	0	0	0	0	0	0	0	0	0	0	0	0	0	0	0	0.00217391
CSAPTRQGGGEAFF	0.00217391	1	0	0	0	0	0	0		0	0	0	0	0	0	0	0	0	0	0	0	0	0	0	0	0	0	0	0	0	0	0	0	0	0	0	0	0	0	0	0	0	0	0	0	0	0	0	0.00217391
CSANQGSFEQFF	0.00217391	1	0	0	0	0	0	0		0	0	0	0	0	0	0	0	0	0	0	0	0	0	0	0	0	0	0	0	0	0	0	0	0	0	0	0	0	0	0	0	0	0	0	0	0	0	0	0.00217391
CSAFPGQGAFGWDEQFF	0.00217391	1	0	0	0	0	0	0		0	0	0	0	0	0	0	0	0	0	0	0	0	0	0	0	0	0	0	0	0	0	0	0	0	0	0	0	0	0	0	0	0	0	0	0	0	0	0	0.00217391
CATTGSGQFF	0.00217391	1	0	0	0	0	0	0		0	0	0	0	0	0	0	0	0	0	0	0	0	0	0	0	0	0	0	0	0	0	0	0	0	0	0	0	0	0	0	0	0	0	0	0	0	0	0	0.00217391
CATSRRGGRLPGELFF	0.00217391	1	0	0	0	0	0	0		0	0	0	0	0	0	0	0	0	0	0	0	0	0	0	0	0	0	0	0	0	0	0	0	0	0	0	0	0	0	0	0	0	0	0	0	0	0	0	0.00217391
CATCRGGFSNQPQHF	0.00217391	1	0	0	0	0	0	0		0	0	0	0	0	0	0	0	0	0	0	0	0	0	0	0	0	0	0	0	0	0	0	0	0	0	0	0	0	0	0	0	0	0	0	0	0	0	0	0.00217391
CASTSFSGFYNEQFF	0.00217391	1	0	0	0	0	0	0		0	0	0	0	0	0	0	0	0	0	0	0	0	0	0	0	0	0	0	0	0	0	0	0	0	0	0	0	0	0	0	0	0	0	0	0	0	0	0	0.00217391
CASTPGSGGAVTGELFF	0.00217391	1	0	0	0	0	0	0		0	0	0	0	0	0	0	0	0	0	0	0	0	0	0	0	0	0	0	0	0	0	0	0	0	0	0	0	0	0	0	0	0	0	0	0	0	0	0	0.00217391
CASTAANSPLHF	0.00217391	1	0	0	0	0	0	0		0	0	0	0	0	0	0	0	0	0	0	0	0	0	0	0	0	0	0	0	0	0	0	0	0	0	0	0	0	0	0	0	0	0	0	0	0	0	0	0.00217391
CASSYRLGQSSGNTIYF	0.00217391	1	0	0	0	0	0	0		0	0	0	0	0	0	0	0	0	0	0	0	0	0	0	0	0	0	0	0	0	0	0	0	0	0	0	0	0	0	0	0	0	0	0	0	0	0	0	0.00217391
CASSYQFYDGYTF	0.00217391	1	0	0	0	0	0	0		0	0	0	0	0	0	0	0	0	0	0	0	0	0	0	0	0	0	0	0	0	0	0	0	0	0	0	0	0	0	0	0	0	0	0	0	0	0	0	0.00217391
CASSYPRTGRNIQYF	0.00217391	1	0	0	0	0	0	0		0	0	0	0	0	0	0	0	0	0	0	0	0	0	0	0	0	0	0	0	0	0	0	0	0	0	0	0	0	0	0	0	0	0	0	0	0	0	0	0.00217391
CASSYLQGRDSPLHF	0.00217391	1	0	0	0	0	0	0		0	0	0	0	0	0	0	0	0	0	0	0	0	0	0	0	0	0	0	0	0	0	0	0	0	0	0	0	0	0	0	0	0	0	0	0	0	0	0	0.00217391
CASSWGRVRTEAFF	0.00217391	1	0	0	0	0	0	0		0	0	0	0	0	0	0	0	0	0	0	0	0	0	0	0	0	0	0	0	0	0	0	0	0	0	0	0	0	0	0	0	0	0	0	0	0	0	0	0.00217391
CASSWGGHQETQYF	0.00217391	1	0	0	0	0	0	0		0	0	0	0	0	0	0	0	0	0	0	0	0	0	0	0	0	0	0	0	0	0	0	0	0	0	0	0	0	0	0	0	0	0	0	0	0	0	0	0.00217391
CASSVLQGSGNTIYF	0.00217391	1	0	0	0	0	0	0		0	0	0	0	0	0	0	0	0	0	0	0	0	0	0	0	0	0	0	0	0	0	0	0	0	0	0	0	0	0	0	0	0	0	0	0	0	0	0	0.00217391
CASSVLLATPFLHHSDNEQFF	0.00217391	1	0	0	0	0	0	0		0	0	0	0	0	0	0	0	0	0	0	0	0	0	0	0	0	0	0	0	0	0	0	0	0	0	0	0	0	0	0	0	0	0	0	0	0	0	0	0.00217391
CASSVDIEERNYGYTF	0.00217391	1	0	0	0	0	0	0		0	0	0	0	0	0	0	0	0	0	0	0	0	0	0	0	0	0	0	0	0	0	0	0	0	0	0	0	0	0	0	0	0	0	0	0	0	0	0	0.00217391
CASSTLANTEALF	0.00217391	1	0	0	0	0	0	0		0	0	0	0	0	0	0	0	0	0	0	0	0	0	0	0	0	0	0	0	0	0	0	0	0	0	0	0	0	0	0	0	0	0	0	0	0	0	0	0.00217391
CASSTGTDYSPLHF	0.00217391	1	0	0	0	0	0	0		0	0	0	0	0	0	0	0	0	0	0	0	0	0	0	0	0	0	0	0	0	0	0	0	0	0	0	0	0	0	0	0	0	0	0	0	0	0	0	0.00217391
CASSTEVTGEYGYTF	0.00217391	1	0	0	0	0	0	0		0	0	0	0	0	0	0	0	0	0	0	0	0	0	0	0	0	0	0	0	0	0	0	0	0	0	0	0	0	0	0	0	0	0	0	0	0	0	0	0.00217391
CASSSRWYNEQFF	0.00217391	1	0	0	0	0	0	0		0	0	0	0	0	0	0	0	0	0	0	0	0	0	0	0	0	0	0	0	0	0	0	0	0	0	0	0	0	0	0	0	0	0	0	0	0	0	0	0.00217391
CASSSRGTTYTDTQYF	0.00217391	1	0	0	0	0	0	0		0	0	0	0	0	0	0	0	0	0	0	0	0	0	0	0	0	0	0	0	0	0	0	0	0	0	0	0	0	0	0	0	0	0	0	0	0	0	0	0.00217391
CASSSQGSTNEKLFF	0.00217391	1	0	0	0	0	0	0		0	0	0	0	0	0	0	0	0	0	0	0	0	0	0	0	0	0	0	0	0	0	0	0	0	0	0	0	0	0	0	0	0	0	0	0	0	0	0	0.00217391
CASSSPGQGWETQYF	0.00217391	1	0	0	0	0	0	0		0	0	0	0	0	0	0	0	0	0	0	0	0	0	0	0	0	0	0	0	0	0	0	0	0	0	0	0	0	0	0	0	0	0	0	0	0	0	0	0.00217391
CASSSPGLAGGGVYNEQFF	0.00217391	1	0	0	0	0	0	0		0	0	0	0	0	0	0	0	0	0	0	0	0	0	0	0	0	0	0	0	0	0	0	0	0	0	0	0	0	0	0	0	0	0	0	0	0	0	0	0.00217391
CASSSLATLGTDTQYF	0.00217391	1	0	0	0	0	0	0		0	0	0	0	0	0	0	0	0	0	0	0	0	0	0	0	0	0	0	0	0	0	0	0	0	0	0	0	0	0	0	0	0	0	0	0	0	0	0	0.00217391
CASSSGLAGGIGELFF	0.00217391	1	0	0	0	0	0	0		0	0	0	0	0	0	0	0	0	0	0	0	0	0	0	0	0	0	0	0	0	0	0	0	0	0	0	0	0	0	0	0	0	0	0	0	0	0	0	0.00217391
CASSSDSVGYNEQFF	0.00217391	1	0	0	0	0	0	0		0	0	0	0	0	0	0	0	0	0	0	0	0	0	0	0	0	0	0	0	0	0	0	0	0	0	0	0	0	0	0	0	0	0	0	0	0	0	0	0.00217391
CASSRWGEQYF	0.00217391	1	0	0	0	0	0	0		0	0	0	0	0	0	0	0	0	0	0	0	0	0	0	0	0	0	0	0	0	0	0	0	0	0	0	0	0	0	0	0	0	0	0	0	0	0	0	0.00217391
CASSRRQGARETQYF	0.00217391	1	0	0	0	0	0	0		0	0	0	0	0	0	0	0	0	0	0	0	0	0	0	0	0	0	0	0	0	0	0	0	0	0	0	0	0	0	0	0	0	0	0	0	0	0	0	0.00217391
CASSRLSISIRTEAFF	0.00217391	1	0	0	0	0	0	0		0	0	0	0	0	0	0	0	0	0	0	0	0	0	0	0	0	0	0	0	0	0	0	0	0	0	0	0	0	0	0	0	0	0	0	0	0	0	0	0.00217391
CASSRKDNTGELFF	0.00217391	1	0	0	0	0	0	0		0	0	0	0	0	0	0	0	0	0	0	0	0	0	0	0	0	0	0	0	0	0	0	0	0	0	0	0	0	0	0	0	0	0	0	0	0	0	0	0.00217391
CASSRGSPRGTDTQYF	0.00217391	1	0	0	0	0	0	0		0	0	0	0	0	0	0	0	0	0	0	0	0	0	0	0	0	0	0	0	0	0	0	0	0	0	0	0	0	0	0	0	0	0	0	0	0	0	0	0.00217391
CASSRGQRLTF	0.00217391	1	0	0	0	0	0	0		0	0	0	0	0	0	0	0	0	0	0	0	0	0	0	0	0	0	0	0	0	0	0	0	0	0	0	0	0	0	0	0	0	0	0	0	0	0	0	0.00217391
CASSRGLVPAGELFF	0.00217391	1	0	0	0	0	0	0		0	0	0	0	0	0	0	0	0	0	0	0	0	0	0	0	0	0	0	0	0	0	0	0	0	0	0	0	0	0	0	0	0	0	0	0	0	0	0	0.00217391
CASSRGLAAAHEQFF	0.00217391	1	0	0	0	0	0	0		0	0	0	0	0	0	0	0	0	0	0	0	0	0	0	0	0	0	0	0	0	0	0	0	0	0	0	0	0	0	0	0	0	0	0	0	0	0	0	0.00217391
CASSQSVTEAFF	0.00217391	1	0	0	0	0	0	0		0	0	0	0	0	0	0	0	0	0	0	0	0	0	0	0	0	0	0	0	0	0	0	0	0	0	0	0	0	0	0	0	0	0	0	0	0	0	0	0.00217391
CASSQDSVGGPDGYTF	0.00217391	1	0	0	0	0	0	0		0	0	0	0	0	0	0	0	0	0	0	0	0	0	0	0	0	0	0	0	0	0	0	0	0	0	0	0	0	0	0	0	0	0	0	0	0	0	0	0.00217391
CASSQDRSSGPQETQYF	0.00217391	1	0	0	0	0	0	0		0	0	0	0	0	0	0	0	0	0	0	0	0	0	0	0	0	0	0	0	0	0	0	0	0	0	0	0	0	0	0	0	0	0	0	0	0	0	0	0.00217391
CASSQDRGLALNEQFF	0.00217391	1	0	0	0	0	0	0		0	0	0	0	0	0	0	0	0	0	0	0	0	0	0	0	0	0	0	0	0	0	0	0	0	0	0	0	0	0	0	0	0	0	0	0	0	0	0	0.00217391
CASSQDQGQYNQPQHF	0.00217391	1	0	0	0	0	0	0		0	0	0	0	0	0	0	0	0	0	0	0	0	0	0	0	0	0	0	0	0	0	0	0	0	0	0	0	0	0	0	0	0	0	0	0	0	0	0	0.00217391
CASSQDLVVPEQFF	0.00217391	1	0	0	0	0	0	0		0	0	0	0	0	0	0	0	0	0	0	0	0	0	0	0	0	0	0	0	0	0	0	0	0	0	0	0	0	0	0	0	0	0	0	0	0	0	0	0.00217391
CASSPSQSRADTQYF	0.00217391	1	0	0	0	0	0	0		0	0	0	0	0	0	0	0	0	0	0	0	0	0	0	0	0	0	0	0	0	0	0	0	0	0	0	0	0	0	0	0	0	0	0	0	0	0	0	0.00217391
CASSPRTSGGAREQFF	0.00217391	1	0	0	0	0	0	0		0	0	0	0	0	0	0	0	0	0	0	0	0	0	0	0	0	0	0	0	0	0	0	0	0	0	0	0	0	0	0	0	0	0	0	0	0	0	0	0.00217391
CASSPPREPDTQYF	0.00217391	1	0	0	0	0	0	0		0	0	0	0	0	0	0	0	0	0	0	0	0	0	0	0	0	0	0	0	0	0	0	0	0	0	0	0	0	0	0	0	0	0	0	0	0	0	0	0.00217391
CASSPHREGHEQYF	0.00217391	1	0	0	0	0	0	0		0	0	0	0	0	0	0	0	0	0	0	0	0	0	0	0	0	0	0	0	0	0	0	0	0	0	0	0	0	0	0	0	0	0	0	0	0	0	0	0.00217391
CASSPGQYRVDEQFF	0.00217391	1	0	0	0	0	0	0		0	0	0	0	0	0	0	0	0	0	0	0	0	0	0	0	0	0	0	0	0	0	0	0	0	0	0	0	0	0	0	0	0	0	0	0	0	0	0	0.00217391
CASSPADSGYEQYF	0.00217391	1	0	0	0	0	0	0		0	0	0	0	0	0	0	0	0	0	0	0	0	0	0	0	0	0	0	0	0	0	0	0	0	0	0	0	0	0	0	0	0	0	0	0	0	0	0	0.00217391
CASSMGRGVSYNEQFF	0.00217391	1	0	0	0	0	0	0		0	0	0	0	0	0	0	0	0	0	0	0	0	0	0	0	0	0	0	0	0	0	0	0	0	0	0	0	0	0	0	0	0	0	0	0	0	0	0	0.00217391
CASSLVVLAGVQETQYF	0.00217391	1	0	0	0	0	0	0		0	0	0	0	0	0	0	0	0	0	0	0	0	0	0	0	0	0	0	0	0	0	0	0	0	0	0	0	0	0	0	0	0	0	0	0	0	0	0	0.00217391
CASSLVAGISAAFF	0.00217391	1	0	0	0	0	0	0		0	0	0	0	0	0	0	0	0	0	0	0	0	0	0	0	0	0	0	0	0	0	0	0	0	0	0	0	0	0	0	0	0	0	0	0	0	0	0	0.00217391
CASSLTPDRGLYEQYF	0.00217391	1	0	0	0	0	0	0		0	0	0	0	0	0	0	0	0	0	0	0	0	0	0	0	0	0	0	0	0	0	0	0	0	0	0	0	0	0	0	0	0	0	0	0	0	0	0	0.00217391
CASSLRGRLGETQYF	0.00217391	1	0	0	0	0	0	0		0	0	0	0	0	0	0	0	0	0	0	0	0	0	0	0	0	0	0	0	0	0	0	0	0	0	0	0	0	0	0	0	0	0	0	0	0	0	0	0.00217391
CASSLMGQAGEKLFF	0.00217391	1	0	0	0	0	0	0		0	0	0	0	0	0	0	0	0	0	0	0	0	0	0	0	0	0	0	0	0	0	0	0	0	0	0	0	0	0	0	0	0	0	0	0	0	0	0	0.00217391
CASSLKQNTGELFF	0.00217391	1	0	0	0	0	0	0		0	0	0	0	0	0	0	0	0	0	0	0	0	0	0	0	0	0	0	0	0	0	0	0	0	0	0	0	0	0	0	0	0	0	0	0	0	0	0	0.00217391
CASSLGPGLAGGETQYF	0.00217391	1	0	0	0	0	0	0		0	0	0	0	0	0	0	0	0	0	0	0	0	0	0	0	0	0	0	0	0	0	0	0	0	0	0	0	0	0	0	0	0	0	0	0	0	0	0	0.00217391
CASSLFDLGGETQYF	0.00217391	1	0	0	0	0	0	0		0	0	0	0	0	0	0	0	0	0	0	0	0	0	0	0	0	0	0	0	0	0	0	0	0	0	0	0	0	0	0	0	0	0	0	0	0	0	0	0.00217391
CASSLASLGALGETQYF	0.00217391	1	0	0	0	0	0	0		0	0	0	0	0	0	0	0	0	0	0	0	0	0	0	0	0	0	0	0	0	0	0	0	0	0	0	0	0	0	0	0	0	0	0	0	0	0	0	0.00217391
CASSLARTSGSSYNEQFF	0.00217391	1	0	0	0	0	0	0		0	0	0	0	0	0	0	0	0	0	0	0	0	0	0	0	0	0	0	0	0	0	0	0	0	0	0	0	0	0	0	0	0	0	0	0	0	0	0	0.00217391
CASSLAGLGPYEQYF	0.00217391	1	0	0	0	0	0	0		0	0	0	0	0	0	0	0	0	0	0	0	0	0	0	0	0	0	0	0	0	0	0	0	0	0	0	0	0	0	0	0	0	0	0	0	0	0	0	0.00217391
CASSKGGTGSTEAFF	0.00217391	1	0	0	0	0	0	0		0	0	0	0	0	0	0	0	0	0	0	0	0	0	0	0	0	0	0	0	0	0	0	0	0	0	0	0	0	0	0	0	0	0	0	0	0	0	0	0.00217391
CASSKAGPLRQPQHF	0.00217391	1	0	0	0	0	0	0		0	0	0	0	0	0	0	0	0	0	0	0	0	0	0	0	0	0	0	0	0	0	0	0	0	0	0	0	0	0	0	0	0	0	0	0	0	0	0	0.00217391
CASSISGTGRAGANVLTF	0.00217391	1	0	0	0	0	0	0		0	0	0	0	0	0	0	0	0	0	0	0	0	0	0	0	0	0	0	0	0	0	0	0	0	0	0	0	0	0	0	0	0	0	0	0	0	0	0	0.00217391
CASSFSGGISYNEQFF	0.00217391	1	0	0	0	0	0	0		0	0	0	0	0	0	0	0	0	0	0	0	0	0	0	0	0	0	0	0	0	0	0	0	0	0	0	0	0	0	0	0	0	0	0	0	0	0	0	0.00217391
CASSFRTSGVGETQYF	0.00217391	1	0	0	0	0	0	0		0	0	0	0	0	0	0	0	0	0	0	0	0	0	0	0	0	0	0	0	0	0	0	0	0	0	0	0	0	0	0	0	0	0	0	0	0	0	0	0.00217391
CASSFRRNSPLHF	0.00217391	1	0	0	0	0	0	0		0	0	0	0	0	0	0	0	0	0	0	0	0	0	0	0	0	0	0	0	0	0	0	0	0	0	0	0	0	0	0	0	0	0	0	0	0	0	0	0.00217391
CASSFGLAGGGSTDTQYF	0.00217391	1	0	0	0	0	0	0		0	0	0	0	0	0	0	0	0	0	0	0	0	0	0	0	0	0	0	0	0	0	0	0	0	0	0	0	0	0	0	0	0	0	0	0	0	0	0	0.00217391
CASSFGGGGSGELFF	0.00217391	1	0	0	0	0	0	0		0	0	0	0	0	0	0	0	0	0	0	0	0	0	0	0	0	0	0	0	0	0	0	0	0	0	0	0	0	0	0	0	0	0	0	0	0	0	0	0.00217391
CASSFAAGVKLFF	0.00217391	1	0	0	0	0	0	0		0	0	0	0	0	0	0	0	0	0	0	0	0	0	0	0	0	0	0	0	0	0	0	0	0	0	0	0	0	0	0	0	0	0	0	0	0	0	0	0.00217391
CASSEYGVNIQYF	0.00217391	1	0	0	0	0	0	0		0	0	0	0	0	0	0	0	0	0	0	0	0	0	0	0	0	0	0	0	0	0	0	0	0	0	0	0	0	0	0	0	0	0	0	0	0	0	0	0.00217391
CASSEVGVGKNIQYF	0.00217391	1	0	0	0	0	0	0		0	0	0	0	0	0	0	0	0	0	0	0	0	0	0	0	0	0	0	0	0	0	0	0	0	0	0	0	0	0	0	0	0	0	0	0	0	0	0	0.00217391
CASSESGRNEQYF	0.00217391	1	0	0	0	0	0	0		0	0	0	0	0	0	0	0	0	0	0	0	0	0	0	0	0	0	0	0	0	0	0	0	0	0	0	0	0	0	0	0	0	0	0	0	0	0	0	0.00217391
CASSESALTSGGETQYF	0.00217391	1	0	0	0	0	0	0		0	0	0	0	0	0	0	0	0	0	0	0	0	0	0	0	0	0	0	0	0	0	0	0	0	0	0	0	0	0	0	0	0	0	0	0	0	0	0	0.00217391
CASSEGTDSSYEQYF	0.00217391	1	0	0	0	0	0	0		0	0	0	0	0	0	0	0	0	0	0	0	0	0	0	0	0	0	0	0	0	0	0	0	0	0	0	0	0	0	0	0	0	0	0	0	0	0	0	0.00217391
CASSDGDRGFGIQYF	0.00217391	1	0	0	0	0	0	0		0	0	0	0	0	0	0	0	0	0	0	0	0	0	0	0	0	0	0	0	0	0	0	0	0	0	0	0	0	0	0	0	0	0	0	0	0	0	0	0.00217391
CASSARQGPWLYGYTF	0.00217391	1	0	0	0	0	0	0		0	0	0	0	0	0	0	0	0	0	0	0	0	0	0	0	0	0	0	0	0	0	0	0	0	0	0	0	0	0	0	0	0	0	0	0	0	0	0	0.00217391
CASSARDWLREQYF	0.00217391	1	0	0	0	0	0	0		0	0	0	0	0	0	0	0	0	0	0	0	0	0	0	0	0	0	0	0	0	0	0	0	0	0	0	0	0	0	0	0	0	0	0	0	0	0	0	0.00217391
CASRSPGLAENEQFF	0.00217391	1	0	0	0	0	0	0		0	0	0	0	0	0	0	0	0	0	0	0	0	0	0	0	0	0	0	0	0	0	0	0	0	0	0	0	0	0	0	0	0	0	0	0	0	0	0	0.00217391
CASRSLGLAENEQFF	0.00217391	1	0	0	0	0	0	0		0	0	0	0	0	0	0	0	0	0	0	0	0	0	0	0	0	0	0	0	0	0	0	0	0	0	0	0	0	0	0	0	0	0	0	0	0	0	0	0.00217391
CASRRRDRLTTNEKLFF	0.00217391	1	0	0	0	0	0	0		0	0	0	0	0	0	0	0	0	0	0	0	0	0	0	0	0	0	0	0	0	0	0	0	0	0	0	0	0	0	0	0	0	0	0	0	0	0	0	0.00217391
CASRRGWNTDTQYF	0.00217391	1	0	0	0	0	0	0		0	0	0	0	0	0	0	0	0	0	0	0	0	0	0	0	0	0	0	0	0	0	0	0	0	0	0	0	0	0	0	0	0	0	0	0	0	0	0	0.00217391
CASRRDPGSLEQYF	0.00217391	1	0	0	0	0	0	0		0	0	0	0	0	0	0	0	0	0	0	0	0	0	0	0	0	0	0	0	0	0	0	0	0	0	0	0	0	0	0	0	0	0	0	0	0	0	0	0.00217391
CASRQSGRLETQYF	0.00217391	1	0	0	0	0	0	0		0	0	0	0	0	0	0	0	0	0	0	0	0	0	0	0	0	0	0	0	0	0	0	0	0	0	0	0	0	0	0	0	0	0	0	0	0	0	0	0.00217391
CASRPGFYNEQFF	0.00217391	1	0	0	0	0	0	0		0	0	0	0	0	0	0	0	0	0	0	0	0	0	0	0	0	0	0	0	0	0	0	0	0	0	0	0	0	0	0	0	0	0	0	0	0	0	0	0.00217391
CASRLGLVEGGELFF	0.00217391	1	0	0	0	0	0	0		0	0	0	0	0	0	0	0	0	0	0	0	0	0	0	0	0	0	0	0	0	0	0	0	0	0	0	0	0	0	0	0	0	0	0	0	0	0	0	0.00217391
CASRKTVEAFF	0.00217391	1	0	0	0	0	0	0		0	0	0	0	0	0	0	0	0	0	0	0	0	0	0	0	0	0	0	0	0	0	0	0	0	0	0	0	0	0	0	0	0	0	0	0	0	0	0	0.00217391
CASRKGRGANYGYTF	0.00217391	1	0	0	0	0	0	0		0	0	0	0	0	0	0	0	0	0	0	0	0	0	0	0	0	0	0	0	0	0	0	0	0	0	0	0	0	0	0	0	0	0	0	0	0	0	0	0.00217391
CASLTSGTLNTGELFF	0.00217391	1	0	0	0	0	0	0		0	0	0	0	0	0	0	0	0	0	0	0	0	0	0	0	0	0	0	0	0	0	0	0	0	0	0	0	0	0	0	0	0	0	0	0	0	0	0	0.00217391
CASLGAWTEAFF	0.00217391	1	0	0	0	0	0	0		0	0	0	0	0	0	0	0	0	0	0	0	0	0	0	0	0	0	0	0	0	0	0	0	0	0	0	0	0	0	0	0	0	0	0	0	0	0	0	0.00217391
CASKRLAGINTGELFF	0.00217391	1	0	0	0	0	0	0		0	0	0	0	0	0	0	0	0	0	0	0	0	0	0	0	0	0	0	0	0	0	0	0	0	0	0	0	0	0	0	0	0	0	0	0	0	0	0	0.00217391
CASKPGALDTEAFF	0.00217391	1	0	0	0	0	0	0		0	0	0	0	0	0	0	0	0	0	0	0	0	0	0	0	0	0	0	0	0	0	0	0	0	0	0	0	0	0	0	0	0	0	0	0	0	0	0	0.00217391
CASKDVGGNSNQPQHF	0.00217391	1	0	0	0	0	0	0		0	0	0	0	0	0	0	0	0	0	0	0	0	0	0	0	0	0	0	0	0	0	0	0	0	0	0	0	0	0	0	0	0	0	0	0	0	0	0	0.00217391
CASGLAHPTDTQYF	0.00217391	1	0	0	0	0	0	0		0	0	0	0	0	0	0	0	0	0	0	0	0	0	0	0	0	0	0	0	0	0	0	0	0	0	0	0	0	0	0	0	0	0	0	0	0	0	0	0.00217391
CASGIGQAKFNIDTQYF	0.00217391	1	0	0	0	0	0	0		0	0	0	0	0	0	0	0	0	0	0	0	0	0	0	0	0	0	0	0	0	0	0	0	0	0	0	0	0	0	0	0	0	0	0	0	0	0	0	0.00217391
CASCVNSGSTYEQYF	0.00217391	1	0	0	0	0	0	0		0	0	0	0	0	0	0	0	0	0	0	0	0	0	0	0	0	0	0	0	0	0	0	0	0	0	0	0	0	0	0	0	0	0	0	0	0	0	0	0.00217391
CASASVPLNYNEQFF	0.00217391	1	0	0	0	0	0	0		0	0	0	0	0	0	0	0	0	0	0	0	0	0	0	0	0	0	0	0	0	0	0	0	0	0	0	0	0	0	0	0	0	0	0	0	0	0	0	0.00217391
CAISGLDEQFF	0.00217391	1	0	0	0	0	0	0		0	0	0	0	0	0	0	0	0	0	0	0	0	0	0	0	0	0	0	0	0	0	0	0	0	0	0	0	0	0	0	0	0	0	0	0	0	0	0	0.00217391
CAIRGTTAEKGYGYTF	0.00217391	1	0	0	0	0	0	0		0	0	0	0	0	0	0	0	0	0	0	0	0	0	0	0	0	0	0	0	0	0	0	0	0	0	0	0	0	0	0	0	0	0	0	0	0	0	0	0.00217391
CASSEGLAYEQYF	0.969691	48	4.088e-05	4.652e-05	6.028e-05	5.72e-05	0	1.12424e-05		0.0350195	0.0782609	0	0.00440529	0.0320634	0.018383	0	0	0.0260304	0.0309278	0.0127725	0.011745	0.0126984	0	0	0.042328	0.00853929	0.0144599	0	0	0.0215054	0.0436364	0.00752304	0.0191819	0	0.00622407	0.0250896	0	0.00048036	0.0109531	0.00980976	0.0120254	0.0157638	0	0	0.0352113	0.0661765	0.0317881	0.0222139	0
CASSQDWGWDSEKLFF	0.0231327	3	0	0	0	0	0	0		0	0	0	0	0	0	0	0	0	0	0	0	0	0	0	0	0	0	0	0	0	0	0	0	0	0	0	0	0	0	0	0	0	0	0	0	0	0	0	0
CASSLEGGNQPQHF	0.0648374	29	0.00012265	4.652e-05	8.707e-05	1.634e-05	6.1413e-05	3.93484e-05		0	0.00434783	0	0	0.00392224	3.128e-05	0	0	0	0	1.701e-05	2.171e-05	0	0	0	0	1.704e-05	0.00064471	0	0	0.00358423	0.00363636	0.00496521	9.289e-05	0	0	0	0	0.00415614	3.591e-05	4.584e-05	1.476e-05	0.00073551	0	0	0	0	0	0	0
CASSDVMRQGYNEQFF	0.0118806	2	0	0	0	0	0	0		0	0	0	0	0	0	0	0	0	0	0	0	0	0	0	0	0	0	0	0	0	0	0	0	0	0	0	0	0	0	0	0	0	0	0	0	0	0	0	0
CASSRGQGAGNEQFF	0.00761556	3	0	0	0	8.17e-06	0	0		0	0	0	0	0	0	0	0	0	0	0	0	0	0	0	0	0	0	0	0	0	0	0	0	0	0	0	0	0	0	0	0	0	0	0	0	0	0	0	0
CASSPGSGSSYNEQFF	0.108538	36	8.177e-05	4.07e-05	4.018e-05	1.634e-05	3.68478e-05	1.12424e-05		0	0.00434783	0	0	0.00138992	0.00166834	0	0.00675676	0.0021692	0.00343643	0.00127555	0.00217099	0.00634921	0	0	0	0	0.00040525	0	0	0.00358423	0.00363636	0.00159865	0.00113791	0	0	0.0143369	0	0.0126146	7.182e-05	0.00220032	0.0002951	0.00043733	0	0	0.00704225	0	0.00011098	0.00211509	0
CASSHTGELFF	0.0079009	12	3.066e-05	5.81e-06	0	8.17e-06	0	0		0	0	0	0	1.904e-05	1.043e-05	0	0	0	0	0	2.171e-05	0	0	0	0	0	0	0	0	0	0	0	0	0	0	0	0	0	1.796e-05	0	0	1.988e-05	0	0	0	0	0	0	0
CSARDRLAGDFYEQYF	0.0178053	3	0	0	0	0	0	0		0	0	0	0	0	0	0	0	0	0	0	0	0	0	0	0	0	0	0	0	0	0	0	0	0	0	0	0	0	0	0	0	0	0	0	0	0	0	0	0
CASTFGRGYNEQFF	0.00784195	2	0	0	0	0	0	0		0	0	0	0	0	0	0	0	0	0	0	0	0	0	0	0	0	0	0	0	0	0	0	0	0	0	0	0	0	0	0	0	0	0	0	0	0	0	0	0
CASSYSWQNYGYTF	0.00939063	2	0	0	0	0	0	0		0	0	0	0	0	0	0	0	0	0	0	0	0	0	0	0	0	0	0	0	0	0	0	0	0	0	0	0	0	0	0	0	0	0	0	0	0	0	0	0
CASSGARLLG	0.00828443	2	0	0	0	0	0	0		0	0	0	0	0	0	0	0	0	0	0	0	0	0	0	0	0	0	0	0	0	0	0	0	0	0	0	0	0	0	0	0	0	0	0	0	0	0	0	0
WQSSEPQSRANVLTF	0.00746269	1	0	0	0	0	0	0		0	0	0	0	0	0	0	0	0	0	0	0	0	0	0	0	0	0	0	0	0	0	0	0	0	0	0	0	0	0	0	0	0	0	0	0	0	0	0	0
CATSRTGGANYEQYF	0.00746269	1	0	0	0	0	0	0		0	0	0	0	0	0	0	0	0	0	0	0	0	0	0	0	0	0	0	0	0	0	0	0	0	0	0	0	0	0	0	0	0	0	0	0	0	0	0	0
CASSYVPTPGLAAETQYF	0.00746269	1	0	0	0	0	0	0		0	0	0	0	0	0	0	0	0	0	0	0	0	0	0	0	0	0	0	0	0	0	0	0	0	0	0	0	0	0	0	0	0	0	0	0	0	0	0	0
CASSYKETEAFF	0.00746269	1	0	0	0	0	0	0		0	0	0	0	0	0	0	0	0	0	0	0	0	0	0	0	0	0	0	0	0	0	0	0	0	0	0	0	0	0	0	0	0	0	0	0	0	0	0	0
CASSVEPDINYGYTF	0.00746269	1	0	0	0	0	0	0		0	0	0	0	0	0	0	0	0	0	0	0	0	0	0	0	0	0	0	0	0	0	0	0	0	0	0	0	0	0	0	0	0	0	0	0	0	0	0	0
CASSSGLAGAYPGETQYF	0.00746269	1	0	0	0	0	0	0		0	0	0	0	0	0	0	0	0	0	0	0	0	0	0	0	0	0	0	0	0	0	0	0	0	0	0	0	0	0	0	0	0	0	0	0	0	0	0	0
CASSLYGDPNEKLFF	0.00746269	1	0	0	0	0	0	0		0	0	0	0	0	0	0	0	0	0	0	0	0	0	0	0	0	0	0	0	0	0	0	0	0	0	0	0	0	0	0	0	0	0	0	0	0	0	0	0
CASSLVTVLQSRANVLI	0.00746269	1	0	0	0	0	0	0		0	0	0	0	0	0	0	0	0	0	0	0	0	0	0	0	0	0	0	0	0	0	0	0	0	0	0	0	0	0	0	0	0	0	0	0	0	0	0	0
CASSDIGGKQYF	0.00746269	1	0	0	0	0	0	0		0	0	0	0	0	0	0	0	0	0	0	0	0	0	0	0	0	0	0	0	0	0	0	0	0	0	0	0	0	0	0	0	0	0	0	0	0	0	0	0
CASGLGLDYEQYF	0.00746269	1	0	0	0	0	0	0		0	0	0	0	0	0	0	0	0	0	0	0	0	0	0	0	0	0	0	0	0	0	0	0	0	0	0	0	0	0	0	0	0	0	0	0	0	0	0	0
CASSPLPRGRDEQFF	0.0843091	11	0	2.326e-05	0	8.17e-06	1.22826e-05	0		0	0	0	0	1.904e-05	0	0	0	0	0	1.701e-05	0	0	0	0	0	0	0	0	0	0	0	0	0	0	0	0	0	0	0	0	0	1.988e-05	0	0	0	0	0	0	0
CASVTGQANYGYTF	0.0277971	23	0	1.163e-05	1.339e-05	8.17e-06	7.36956e-05	2.8106e-05		0	0	0.00274725	0	9.52e-05	0.00070904	0	0	0	0	0.00076533	0	0	0	0	0	0	0	0	0	0	0	1.881e-05	0	0	0.00103734	0	0	0.00010443	0.0006105	0.00049278	0.00087055	0.00143127	0	0	0	0	0.00171227	0.00015343	0
CASSLQNGRHEQFF	0.0159411	28	7.155e-05	4.652e-05	7.367e-05	4.903e-05	1.22826e-05	0		0	0	0	0	3.808e-05	4.171e-05	0	0	0	0	3.401e-05	4.342e-05	0	0	0	0	3.409e-05	5.526e-05	0	0	0	0	3.762e-05	6.967e-05	0	0	0	0	6.266e-05	5.387e-05	4.584e-05	1.476e-05	3.976e-05	0	0	0	0	4.756e-05	2.192e-05	0
CASSPLGSYGYTF	0.0400213	11	6.132e-05	2.326e-05	1.339e-05	0	0	1.12424e-05		0	0	0	0	3.808e-05	0	0	0	0	0	0	0	0	0	0	0	0	0	0	0	0	0	0	0	0	0	0	0	0.00048036	0	0	0	0	0	0	0	0	0	0	0
CASSLRTSGGIGELFF	0.0698953	11	1.022e-05	5.81e-06	0	0	0	0		0	0	0	0	0	0	0	0	0	0	0	0	0	0	0	0	0	0	0	0	0	0	0	0	0	0	0	0	2.089e-05	0	0	0	1.988e-05	0	0	0	0	0	1.096e-05	0
CASSFGQGASTEAFF	0.0826225	35	0.00018397	6.978e-05	7.367e-05	4.903e-05	0.000122826	0.000219227		0	0	0	0	0.00032368	3.128e-05	0	0	0	0.00343643	1.701e-05	0.00062959	0	0	0	0	1.704e-05	5.526e-05	0.00308642	0	0.00358423	0.00363636	0.0129584	2.322e-05	0	0	0	0	0.0021094	0	0.00035526	7.378e-05	1.988e-05	0.00246914	0	0.00704225	0.0147059	0.0101468	0.00142467	0
CASSESSTDNSPLHF	0.0426187	33	0.00016353	0.00012211	0.00014065	5.72e-05	4.91304e-05	7.86968e-05		0.00389105	0	0	0	0.00043792	0.0002294	0	0	0	0	0.00034015	0.00015197	0	0	0	0	0.0001534	7.368e-05	0	0	0	0	0.00596201	0.00013934	0	0	0	0	0.00071009	8.978e-05	0.00024066	0.00033937	0.0002783	0	0	0.00704225	0.00735294	0.00020611	0.00010959	0
CSARGMDSSNTIYF	0.049057	30	0.00015331	4.652e-05	6.028e-05	6.538e-05	4.91304e-05	3.93484e-05		0	0	0	0	0.00030464	0.00101143	0	0	0.0021692	0.00343643	3.401e-05	0.00221441	0.0031746	0	0	0	0	0.00134468	0	0	0	0	0.00060184	0.00147464	0	0	0	0	0.00902237	0.0006105	0.00030942	2.951e-05	0.00310108	0	0	0	0	3.171e-05	2.192e-05	0
CASTQAGLNTGELFF	0.00478326	25	4.088e-05	1.744e-05	4.018e-05	3.269e-05	0	0		0	0	0	0	7.616e-05	3.128e-05	0	0	0	0	0	2.171e-05	0	0	0	0	3.409e-05	0	0	0	0	0	9.404e-05	1.161e-05	0	0	0	0	0.00010443	5.387e-05	3.438e-05	4.427e-05	1.988e-05	0	0	0	0	6.342e-05	4.384e-05	0
CASSLFQETQYF	0.0218451	25	0	0	0	4.086e-05	0	0		0	0.00434783	0	0	7.616e-05	0.0025025	0	0	0	0	0.00015307	0.00013026	0	0	0	0	1.704e-05	0.00014736	0	0	0	0	0.00013165	6.967e-05	0	0	0	0	0	0.00037707	5.73e-05	8.853e-05	5.964e-05	0	0	0	0	0.00011098	6.575e-05	0
CASGLWGELGDTQYF	0.00447024	25	4.088e-05	2.907e-05	4.018e-05	2.452e-05	1.22826e-05	5.6212e-06		0	0	0	0	3.808e-05	3.128e-05	0	0	0	0	3.401e-05	2.171e-05	0	0	0	0	3.409e-05	0	0	0	0	0	1.881e-05	2.322e-05	0	0	0	0	4.177e-05	1.796e-05	0	4.427e-05	5.964e-05	0	0	0	0	1.585e-05	2.192e-05	0
CASSPQGTSSYNEQFF	0.00427672	21	6.132e-05	2.907e-05	3.349e-05	4.903e-05	1.22826e-05	5.6212e-06		0	0	0	0	1.904e-05	2.085e-05	0	0	0	0	0	2.171e-05	0	0	0	0	1.704e-05	0	0	0	0	0	3.762e-05	2.322e-05	0	0	0	0	2.089e-05	0	0	4.427e-05	3.976e-05	0	0	0	0	1.585e-05	1.096e-05	0
CASSSGTVEGSETQYF	0.00408406	17	5.11e-05	2.907e-05	4.018e-05	4.903e-05	0	0		0	0	0	0	1.904e-05	0	0	0	0	0	1.701e-05	0	0	0	0	0	0	0	0	0	0	0	1.881e-05	0	0	0	0	0	0	1.796e-05	1.146e-05	1.476e-05	0	0	0	0	0	0	1.096e-05	0
CASSRSYEQYF	0.00400032	14	2.044e-05	5.81e-06	4.018e-05	1.634e-05	0	1.12424e-05		0	0	0	0	1.904e-05	1.043e-05	0	0	0	0	1.701e-05	0	0	0	0	0	0	0	0	0	0	0	3.762e-05	0	0	0	0	0	0	0	0	0	1.988e-05	0	0	0	0	1.585e-05	1.096e-05	0
CASSLGGDQPQHF	0.0039917	13	0	1.163e-05	6.7e-06	0	0	0		0	0	0	0	0	2.085e-05	0	0	0	0	0	0	0	0	0	0	6.818e-05	1.842e-05	0	0	0	0	1.881e-05	0	0	0	0	0	4.177e-05	1.796e-05	0	0	0	0	0	0	0	0	0	0
CASSQDYEQYF	0.00397707	12	2.044e-05	0	1.339e-05	2.452e-05	0	0		0	0	0	0	0	1.043e-05	0	0	0	0	0	0	0	0	0	0	0	7.368e-05	0	0	0	0	1.881e-05	0	0	0	0	0	2.089e-05	0	1.146e-05	1.476e-05	0	0	0	0	0	0	2.192e-05	0
CASSDLAGGNEQFF	0.00386926	12	1.022e-05	5.81e-06	6.7e-06	8.17e-06	0	0		0	0	0	0	0	0	0	0	0	0	0	0	0	0	0	0	0	0	0	0	0	0	1.881e-05	1.161e-05	0	0	0	0	0	1.796e-05	0	0	1.988e-05	0	0	0	0	0	1.096e-05	0
CASSLGTGVYEQYF	0.00391967	11	2.044e-05	1.744e-05	1.339e-05	1.634e-05	0	0		0	0	0	0	0	1.043e-05	0	0	0	0	0	0	0	0	0	0	0	1.842e-05	0	0	0	0	0	3.483e-05	0	0	0	0	0	0	0	1.476e-05	0	0	0	0	0	1.585e-05	0	0
CATSVTSTGELFF	0.00391762	10	4.088e-05	1.744e-05	6.7e-06	1.634e-05	2.45652e-05	0		0	0	0	0	0	0	0	0	0	0	0	0	0	0	0	0	1.704e-05	0	0	0	0	0	0	0	0	0	0	0	4.177e-05	0	1.146e-05	1.476e-05	1.988e-05	0	0	0	0	0	0	0
CASSRTVNTEAFF	0.00389613	9	2.044e-05	2.326e-05	1.339e-05	1.634e-05	1.22826e-05	1.12424e-05		0	0	0	0	0	2.085e-05	0	0	0	0	0	0	0	0	0	0	0	0	0	0	0	0	0	1.161e-05	0	0	0	0	0	0	1.146e-05	0	0	0	0	0	0	0	0	0
CASSPSGTSGWEKLFF	0.00404191	9	0	5.81e-06	1.339e-05	8.17e-06	0	0		0	0	0	0	0	0	0	0	0	0	0	2.171e-05	0	0	0	0	0	0	0	0	0	0	0	0	0	0	0	0	0	0	0	0	0	0	0	0	0	0	0	0
CASSLLEGAGRRGTGELFF	0.003838	9	1.022e-05	5.81e-06	1.339e-05	1.634e-05	0	0		0	0	0	0	1.904e-05	0	0	0	0	0	0	0	0	0	0	0	1.704e-05	0	0	0	0	0	0	0	0	0	0	0	0	0	0	0	0	0	0	0	0	0	0	0
CASSFSLTNEQFF	0.00389166	9	0	1.163e-05	0	2.452e-05	0	0		0	0	0	0	0	2.085e-05	0	0	0	0	0	0	0	0	0	0	0	0	0	0	0	0	1.881e-05	0	0	0	0	0	2.089e-05	0	0	0	1.988e-05	0	0	0	0	0	0	0
CASSLGRFPYEQYF	0.00385622	8	0	1.163e-05	0	8.17e-06	0	0		0	0	0	0	0	1.043e-05	0	0	0	0	0	0	0	0	0	0	0	0	0	0	0	0	5.642e-05	1.161e-05	0	0	0	0	0	0	0	1.476e-05	0	0	0	0	0	0	0	0
CSAKMGSGSTDTQYF	0.0038496	6	1.022e-05	0	0	0	0	0		0	0	0	0	1.904e-05	0	0	0	0	0	0	0	0	0	0	0	5.113e-05	0	0	0	0	0	0	0	0	0	0	0	0	0	0	0	0	0	0	0	0	0	2.192e-05	0
CASSQGLAGGGSYNEQFF	0.00397541	6	1.022e-05	0	6.7e-06	0	0	0		0	0	0	0	0	0	0	0	0	0	0	0	0	0	0	0	0	0	0	0	0	0	0	0	0	0	0	0	0	0	0	2.951e-05	0	0	0	0	0	0	0	0
CASSLRRANTGELFF	0.00400526	6	0	5.81e-06	0	8.17e-06	0	0		0	0	0	0	0	0	0	0	0	0	0	0	0	0	0	0	0	0	0	0	0	0	0	0	0	0	0	0	0	0	0	0	1.988e-05	0	0	0	0	0	0	0
CASSLGEQFF	0.00385494	6	0	5.81e-06	0	0	0	0		0	0	0	0	1.904e-05	0	0	0	0	0	0	0	0	0	0	0	1.704e-05	0	0	0	0	0	0	0	0	0	0	0	4.177e-05	0	0	0	0	0	0	0	0	0	0	0
CASSPRVGGINEQFF	0.00390359	5	1.022e-05	1.163e-05	0	8.17e-06	0	0		0	0	0	0	0	0	0	0	0	0	0	0	0	0	0	0	0	0	0	0	0	0	0	0	0	0	0	0	0	0	0	0	0	0	0	0	0	0	0	0
CASSLGGGAGETQYF	0.00380143	5	0	0	0	8.17e-06	0	0		0	0	0	0	0	1.043e-05	0	0	0	0	0	0	0	0	0	0	0	0	0	0	0	0	0	0	0	0	0	0	0	0	0	0	1.988e-05	0	0	0	0	0	0	0
CASSGGDTQYF	0.00378588	5	0	0	6.7e-06	0	1.22826e-05	0		0	0	0	0	0	0	0	0	0	0	0	0	0	0	0	0	0	1.842e-05	0	0	0	0	0	0	0	0	0	0	0	1.796e-05	1.146e-05	0	0	0	0	0	0	0	0	0
CASSAGPYEQYF	0.0101786	5	0	1.163e-05	0	0	0	0		0	0	0	0	0	0	0	0	0	0	0	0	0	0	0	0	0	0	0	0	0	0	0	0	0	0	0	0	0	0	0	0	0	0	0	0	0	1.585e-05	0	0
CSATRDTSYEQYF	0.0037676	4	0	5.81e-06	1.339e-05	0	0	0		0	0	0	0	0	0	0	0	0	0	0	0	0	0	0	0	1.704e-05	0	0	0	0	0	0	0	0	0	0	0	0	0	0	0	0	0	0	0	0	0	0	0
CATESVGTGTEQFF	0.00376113	4	0	5.81e-06	0	8.17e-06	0	1.12424e-05		0	0	0	0	0	0	0	0	0	0	0	0	0	0	0	0	0	0	0	0	0	0	0	0	0	0	0	0	0	0	0	0	0	0	0	0	0	0	0	0
CASSLAGRDYEQYF	0.00376345	4	1.022e-05	0	0	0	0	0		0	0	0	0	0	1.043e-05	0	0	0	0	0	0	0	0	0	0	0	0	0	0	0	0	0	0	0	0	0	0	0	0	1.146e-05	0	0	0	0	0	0	0	0	0
CASSDRGGYEQYF	0.0073688	4	0	5.81e-06	0	0	0	0		0	0	0	0	0	0	0	0	0	0	0	0	0	0	0	0	0	0	0	0	0.00358423	0	0	0	0	0	0	0	0	0	0	0	0	0	0	0	0	0	0	0
CSVDKTGGHGYTF	0.00483869	3	0	0	0	0	0	0		0	0	0	0	0	0	0	0	0	0	0	0	0	0	0	0	0	0	0	0	0	0	0	0	0	0	0	0	0	0	1.146e-05	0	0	0	0	0	0	0	0	0
CSARGVLAGVGTGELFF	0.00782808	3	0	0	0	0	0	0		0	0	0	0	0	0	0	0	0	0	0	0	0	0	0	0	0	0	0	0	0	0	0	0	0	0	0	0	0	0	0	0	0	0	0	0	0	0	0	0
CSARGQGDYGYTF	0.00375246	3	0	0	0	8.17e-06	0	0		0	0	0	0	0	0	0	0	0	0	0	0	0	0	0	0	0	0	0	0	0	0	0	0	0	0	0	0	0	0	0	0	0	0	0	0	0	0	0	0
CASSYKRTGRLLNEQYF	0.0131378	3	0	0	0	0	0	0		0	0	0	0	0	0	0	0	0	0	0	0	0	0	0	0	0	0	0	0	0	0	0	0	0	0	0	0	0	0	0	0	0	0	0	0	0	0	0	0
CASSTEQTGYGYTF	0.0172346	3	0	0	0	0	0	0		0	0	0	0	0	0	0	0	0	0	0	0	0	0	0	0	0	0	0	0	0	0	0	0	0	0	0	0	0	0	0	0	0	0	0	0	0	0	0	0
CASSRLAGASSNTGELFF	0.00628244	3	0	0	0	0	0	0		0	0	0	0	0	0	0	0	0	0	0	0	0	0	0	0	0	0	0	0	0	0	0	0	0	0	0	0	0	0	0	0	0	0	0	0	0	0	0	0
CASSQFDREGTEQFF	0.0131263	3	0	0	0	0	0	0		0	0	0	0	0	0	0	0	0	0	0	0	0	0	0	0	0	0	0	0	0	0	0	0	0	0	0	0	0	0	0	0	0	0	0	0	0	0	0	0
CASSQDNPGGTDTQYF	0.00749622	3	0	0	0	0	0	0		0	0	0	0	0	0	0	0	0	0	0	0	0	0	0	0	0	0	0	0	0	0	0	0	0	0	0	0	0	0	0	0	0	0	0	0	0	0	0	0
CASSQASSGYEQYF	0.00763845	3	0	0	0	0	0	0		0	0	0	0	0	0	0	0	0	0	0	0	0	0	0	0	0	0	0	0	0	0	0	0	0	0	0	0	0	0	0	0	0	0	0	0	0	0	0	0
CASSPRAGLAGGSPLGDEQFF	0.0090765	3	0	0	0	0	0	0		0	0	0	0	0	0	0	0	0	0	0	0	0	0	0	0	0	0	0	0	0	0	0	0	0	0	0	0	0	0	0	0	0	0	0	0	0	0	0	0
CASSPLTGGEQYF	0.0196208	3	0	0	0	0	0	0		0	0	0	0	0	0	0	0	0	0	0	0	0	0	0	0	0	0	0	0	0	0	0	0	0	0	0	0	0	0	0	0	0	0	0	0	0	0	0	0
CASSLRPGGGETQYF	0.00785969	3	0	0	0	0	0	0		0	0	0	0	0	0	0	0	0	0	0	0	0	0	0	0	0	0	0	0	0	0	0	0	0	0	0	0	0	0	0	0	0	0	0	0	0	0	0	0
CASSLEGANQPQHF	0.00375318	3	1.022e-05	0	0	0	0	0		0	0	0	0	0	0	0	0	0	0	0	0	0	0	0	0	0	0	0	0	0	0	0	1.161e-05	0	0	0	0	0	0	0	0	0	0	0	0	0	0	0	0
CASSLEADEQFF	0.00375708	3	0	0	6.7e-06	0	0	0		0	0	0	0	1.904e-05	0	0	0	0	0	0	0	0	0	0	0	0	0	0	0	0	0	0	0	0	0	0	0	0	0	0	0	0	0	0	0	0	0	0	0
CASSESRIPYEQYF	0.0187656	3	0	0	0	0	0	0		0	0	0	0	0	0	0	0	0	0	0	0	0	0	0	0	0	0	0	0	0	0	0	0	0	0	0	0	0	0	0	0	0	0	0	0	0	0	0	0
CASRPTASGSSYEQYF	0.00375497	3	0	0	0	0	0	0		0	0	0	0	0	1.043e-05	0	0	0	0	0	0	0	0	0	0	0	0	0	0	0	0	0	0	0	0	0	0	0	0	0	0	0	0	0	0	0	0	0	0
CSVLGTNTIYF	0.00375775	2	0	0	0	0	0	0		0	0	0	0	0	0	0	0	0	0	0	0	0	0	0	0	0	0	0	0	0	0	0	0	0	0	0	0	0	0	0	0	0	0	0	0	0	0	0	0
CSPTSGKLGDTQYF	0.00517052	2	0	0	0	0	0	0		0	0	0	0	0	0	0	0	0	0	0	0	0	0	0	0	0	0	0	0	0	0	0	0	0	0	0	0	0	0	0	0	0	0	0	0	0	0	0	0
CSAYSYEQYF	0.00373952	2	0	0	0	8.17e-06	0	0		0	0	0	0	0	0	0	0	0	0	0	0	0	0	0	0	0	0	0	0	0	0	0	0	0	0	0	0	0	0	0	0	0	0	0	0	0	0	0	0
CSARRRGGNTIYF	0.00436511	2	0	0	0	0	0	0		0	0	0	0	0	0	0	0	0	0	0	0	0	0	0	0	0	0	0	0	0	0	0	0	0	0	0	0	0	0	0	0	0	0	0	0	0	0	0	0
CSAAGGRVSYGYTF	0.00373952	2	0	0	0	8.17e-06	0	0		0	0	0	0	0	0	0	0	0	0	0	0	0	0	0	0	0	0	0	0	0	0	0	0	0	0	0	0	0	0	0	0	0	0	0	0	0	0	0	0
CASSYLCDVQQGPGSVGYNEQFF	0.00411061	2	0	0	0	0	0	0		0	0	0	0	0	0	0	0	0	0	0	0	0	0	0	0	0	0	0	0	0	0	0	0	0	0	0	0	0	0	0	0	0	0	0	0	0	0	0	0
CASSSTREQYF	0.0037432	2	0	0	0	0	0	0		0	0	0	0	0	0	0	0	0	0	0	0	0	0	0	0	0	0	0	0	0	0	0	0	0	0	0	0	0	0	0	0	0	0	0	0	0	0	0	0
CASSRPPGTVQETQYF	0.00387357	2	0	0	0	0	0	0		0	0	0	0	0	0	0	0	0	0	0	0	0	0	0	0	0	0	0	0	0	0	0	0	0	0	0	0	0	0	0	0	0	0	0	0	0	0	0	0
CASSLGVVTEAFF	0.00373804	2	0	0	6.7e-06	0	0	0		0	0	0	0	0	0	0	0	0	0	0	0	0	0	0	0	0	0	0	0	0	0	0	0	0	0	0	0	0	0	0	0	0	0	0	0	0	0	0	0
CASSLGVAEQETQYF	0.00374455	2	0	0	0	0	0	0		0	0	0	0	0	0	0	0	0	0	0	0	0	0	0	0	0	0	0	0	0	0	0	0	0	0	0	0	0	0	0	0	0	0	0	0	0	0	0	0
CASSLGRTGEQYF	0.00373952	2	0	0	0	8.17e-06	0	0		0	0	0	0	0	0	0	0	0	0	0	0	0	0	0	0	0	0	0	0	0	0	0	0	0	0	0	0	0	0	0	0	0	0	0	0	0	0	0	0
CASSLATSGDSYEQYF	0.00458957	2	0	0	0	0	0	0		0	0	0	0	0	0	0	0	0	0	0	0	0	0	0	0	0	0	0	0	0	0	0	0	0	0	0	0	0	0	0	0	0	0	0	0	0	0	0	0
CASSLARRGTEAFF	0.00375038	2	0	0	0	0	0	0		0	0	0	0	1.904e-05	0	0	0	0	0	0	0	0	0	0	0	0	0	0	0	0	0	0	0	0	0	0	0	0	0	0	0	0	0	0	0	0	0	0	0
CASSHEGVQPQHF	0.00374177	2	0	0	0	0	0	0		0	0	0	0	0	1.043e-05	0	0	0	0	0	0	0	0	0	0	0	0	0	0	0	0	0	0	0	0	0	0	0	0	0	0	0	0	0	0	0	0	0	0
CASSGTSGRAVDTQYF	0.00375015	2	0	0	0	0	0	0		0	0	0	0	0	0	0	0	0	0	0	0	0	0	0	0	0	0	0	0	0	0	1.881e-05	0	0	0	0	0	0	0	0	0	0	0	0	0	0	0	0	0
CASSFTSGGAGETQYF	0.00373804	2	0	0	6.7e-06	0	0	0		0	0	0	0	0	0	0	0	0	0	0	0	0	0	0	0	0	0	0	0	0	0	0	0	0	0	0	0	0	0	0	0	0	0	0	0	0	0	0	0
CASSFTPGNEQFF	0.00401579	2	0	0	0	0	0	0		0	0	0	0	0	0	0	0	0	0	0	0	0	0	0	0	0	0	0	0	0	0	0	0	0	0	0	0	0	0	0	0	0	0	0	0	0	0	0	0
CASSFGQGTEQYF	0.00374429	2	0	0	0	0	0	0		0	0	0	0	0	0	0	0	0	0	0	0	0	0	0	0	0	0	0	0	0	0	0	0	0	0	0	0	0	0	0	0	0	0	0	0	0	0	0	0
CASSFGEDTQYF	0.00373804	2	0	0	6.7e-06	0	0	0		0	0	0	0	0	0	0	0	0	0	0	0	0	0	0	0	0	0	0	0	0	0	0	0	0	0	0	0	0	0	0	0	0	0	0	0	0	0	0	0
CASSELAPTKNSPLHF	0.00377095	2	0	0	0	0	0	0		0	0	0	0	0	0	0	0	0	0	0	0	0	0	0	0	0	0	0	0	0	0	0	0	0	0	0	0	0	0	0	0	0	0	0	0	0	0	0	0
CASSEGTGAQPQHF	0.00374156	2	1.022e-05	0	0	0	0	0		0	0	0	0	0	0	0	0	0	0	0	0	0	0	0	0	0	0	0	0	0	0	0	0	0	0	0	0	0	0	0	0	0	0	0	0	0	0	0	0
CASSARTGVFLQPQHF	0.00376295	2	0	0	0	0	0	0		0	0	0	0	0	0	0	0	0	0	0	0	0	0	0	0	0	0	0	0	0	0	0	0	0	0	0	0	0	0	0	0	0	0	0	0	0	0	0	0
CASRSPHGTNEKLFF	0.00618077	2	0	0	0	0	0	0		0	0	0	0	0	0	0	0	0	0	0	0	0	0	0	0	0	0	0	0	0	0	0	0	0	0	0	0	0	0	0	0	0	0	0	0	0	0	0	0
CASRGTGSTDTQYF	0.0037428	2	0	0	0	0	0	0		0	0	0	0	0	0	0	0	0	0	0	0	0	0	0	0	0	0	0	0	0	0	0	0	0	0	0	0	0	0	1.146e-05	0	0	0	0	0	0	0	0	0
CASPLAWRCQPREKNIQYF	0.00374715	2	0	0	0	0	0	0		0	0	0	0	0	0	0	0	0	0	0	0	0	0	0	0	0	0	0	0	0	0	0	0	0	0	0	0	0	0	0	0	0	0	0	0	0	0	0	0
CASNFQGGQGPGELFF	0.00524974	2	0	0	0	0	0	0		0	0	0	0	0	0	0	0	0	0	0	0	0	0	0	0	0	0	0	0	0	0	0	0	0	0	0	0	0	0	0	0	0	0	0	0	0	0	0	0
CSVSGRTGELFF	0.00373134	1	0	0	0	0	0	0		0	0	0	0	0	0	0	0	0	0	0	0	0	0	0	0	0	0	0	0	0	0	0	0	0	0	0	0	0	0	0	0	0	0	0	0	0	0	0	0
CSVEEYRQGPNTEAFF	0.00373134	1	0	0	0	0	0	0		0	0	0	0	0	0	0	0	0	0	0	0	0	0	0	0	0	0	0	0	0	0	0	0	0	0	0	0	0	0	0	0	0	0	0	0	0	0	0	0
CSVEDRASVEQYF	0.00373134	1	0	0	0	0	0	0		0	0	0	0	0	0	0	0	0	0	0	0	0	0	0	0	0	0	0	0	0	0	0	0	0	0	0	0	0	0	0	0	0	0	0	0	0	0	0	0
CSVATRDTEAFF	0.00373134	1	0	0	0	0	0	0		0	0	0	0	0	0	0	0	0	0	0	0	0	0	0	0	0	0	0	0	0	0	0	0	0	0	0	0	0	0	0	0	0	0	0	0	0	0	0	0
CSAREGGSSYNSPLHF	0.00373134	1	0	0	0	0	0	0		0	0	0	0	0	0	0	0	0	0	0	0	0	0	0	0	0	0	0	0	0	0	0	0	0	0	0	0	0	0	0	0	0	0	0	0	0	0	0	0
CSARDRNGVYNEQFF	0.00373134	1	0	0	0	0	0	0		0	0	0	0	0	0	0	0	0	0	0	0	0	0	0	0	0	0	0	0	0	0	0	0	0	0	0	0	0	0	0	0	0	0	0	0	0	0	0	0
CSARDFTGGPPDTQYF	0.00373134	1	0	0	0	0	0	0		0	0	0	0	0	0	0	0	0	0	0	0	0	0	0	0	0	0	0	0	0	0	0	0	0	0	0	0	0	0	0	0	0	0	0	0	0	0	0	0
CSARASGRVYNEQFF	0.00373134	1	0	0	0	0	0	0		0	0	0	0	0	0	0	0	0	0	0	0	0	0	0	0	0	0	0	0	0	0	0	0	0	0	0	0	0	0	0	0	0	0	0	0	0	0	0	0
CSAMSAAAGETQYF	0.00373134	1	0	0	0	0	0	0		0	0	0	0	0	0	0	0	0	0	0	0	0	0	0	0	0	0	0	0	0	0	0	0	0	0	0	0	0	0	0	0	0	0	0	0	0	0	0	0
CATTEGGELFF	0.00373134	1	0	0	0	0	0	0		0	0	0	0	0	0	0	0	0	0	0	0	0	0	0	0	0	0	0	0	0	0	0	0	0	0	0	0	0	0	0	0	0	0	0	0	0	0	0	0
CATSSGSINEQFF	0.00373134	1	0	0	0	0	0	0		0	0	0	0	0	0	0	0	0	0	0	0	0	0	0	0	0	0	0	0	0	0	0	0	0	0	0	0	0	0	0	0	0	0	0	0	0	0	0	0
CATSRDRASGRLGTGELFF	0.00373134	1	0	0	0	0	0	0		0	0	0	0	0	0	0	0	0	0	0	0	0	0	0	0	0	0	0	0	0	0	0	0	0	0	0	0	0	0	0	0	0	0	0	0	0	0	0	0
CATSDQGDTQYF	0.00373134	1	0	0	0	0	0	0		0	0	0	0	0	0	0	0	0	0	0	0	0	0	0	0	0	0	0	0	0	0	0	0	0	0	0	0	0	0	0	0	0	0	0	0	0	0	0	0
CASYPASGRATYNEQFF	0.00373134	1	0	0	0	0	0	0		0	0	0	0	0	0	0	0	0	0	0	0	0	0	0	0	0	0	0	0	0	0	0	0	0	0	0	0	0	0	0	0	0	0	0	0	0	0	0	0
CASTVGGNTEAFF	0.00373134	1	0	0	0	0	0	0		0	0	0	0	0	0	0	0	0	0	0	0	0	0	0	0	0	0	0	0	0	0	0	0	0	0	0	0	0	0	0	0	0	0	0	0	0	0	0	0
CASTSGNSYEQYF	0.00373134	1	0	0	0	0	0	0		0	0	0	0	0	0	0	0	0	0	0	0	0	0	0	0	0	0	0	0	0	0	0	0	0	0	0	0	0	0	0	0	0	0	0	0	0	0	0	0
CASTSGGQPQHF	0.00373134	1	0	0	0	0	0	0		0	0	0	0	0	0	0	0	0	0	0	0	0	0	0	0	0	0	0	0	0	0	0	0	0	0	0	0	0	0	0	0	0	0	0	0	0	0	0	0
CASSYSTSRVNTEAFF	0.00373134	1	0	0	0	0	0	0		0	0	0	0	0	0	0	0	0	0	0	0	0	0	0	0	0	0	0	0	0	0	0	0	0	0	0	0	0	0	0	0	0	0	0	0	0	0	0	0
CASSYSLPSYNSPLHF	0.00373134	1	0	0	0	0	0	0		0	0	0	0	0	0	0	0	0	0	0	0	0	0	0	0	0	0	0	0	0	0	0	0	0	0	0	0	0	0	0	0	0	0	0	0	0	0	0	0
CASSYSGNADEQFF	0.00373134	1	0	0	0	0	0	0		0	0	0	0	0	0	0	0	0	0	0	0	0	0	0	0	0	0	0	0	0	0	0	0	0	0	0	0	0	0	0	0	0	0	0	0	0	0	0	0
CASSYLTAGPQHF	0.00373134	1	0	0	0	0	0	0		0	0	0	0	0	0	0	0	0	0	0	0	0	0	0	0	0	0	0	0	0	0	0	0	0	0	0	0	0	0	0	0	0	0	0	0	0	0	0	0
CASSVVQRGAEQFF	0.00373134	1	0	0	0	0	0	0		0	0	0	0	0	0	0	0	0	0	0	0	0	0	0	0	0	0	0	0	0	0	0	0	0	0	0	0	0	0	0	0	0	0	0	0	0	0	0	0
CASSVGVGGEQHF	0.00373134	1	0	0	0	0	0	0		0	0	0	0	0	0	0	0	0	0	0	0	0	0	0	0	0	0	0	0	0	0	0	0	0	0	0	0	0	0	0	0	0	0	0	0	0	0	0	0
CASSVGDRGNEKLFF	0.00373134	1	0	0	0	0	0	0		0	0	0	0	0	0	0	0	0	0	0	0	0	0	0	0	0	0	0	0	0	0	0	0	0	0	0	0	0	0	0	0	0	0	0	0	0	0	0	0
CASSVEVGREVSTDTQYF	0.00373134	1	0	0	0	0	0	0		0	0	0	0	0	0	0	0	0	0	0	0	0	0	0	0	0	0	0	0	0	0	0	0	0	0	0	0	0	0	0	0	0	0	0	0	0	0	0	0
CASSSRLAGELDTQYF	0.00373134	1	0	0	0	0	0	0		0	0	0	0	0	0	0	0	0	0	0	0	0	0	0	0	0	0	0	0	0	0	0	0	0	0	0	0	0	0	0	0	0	0	0	0	0	0	0	0
CASSSGTSLNTEAFF	0.00373134	1	0	0	0	0	0	0		0	0	0	0	0	0	0	0	0	0	0	0	0	0	0	0	0	0	0	0	0	0	0	0	0	0	0	0	0	0	0	0	0	0	0	0	0	0	0	0
CASSSGRLGDEQYF	0.00373134	1	0	0	0	0	0	0		0	0	0	0	0	0	0	0	0	0	0	0	0	0	0	0	0	0	0	0	0	0	0	0	0	0	0	0	0	0	0	0	0	0	0	0	0	0	0	0
CASSSGQGHNEQFF	0.00373134	1	0	0	0	0	0	0		0	0	0	0	0	0	0	0	0	0	0	0	0	0	0	0	0	0	0	0	0	0	0	0	0	0	0	0	0	0	0	0	0	0	0	0	0	0	0	0
CASSRQREWDTQYF	0.00373134	1	0	0	0	0	0	0		0	0	0	0	0	0	0	0	0	0	0	0	0	0	0	0	0	0	0	0	0	0	0	0	0	0	0	0	0	0	0	0	0	0	0	0	0	0	0	0
CASSRPGTGRTGELFF	0.00373134	1	0	0	0	0	0	0		0	0	0	0	0	0	0	0	0	0	0	0	0	0	0	0	0	0	0	0	0	0	0	0	0	0	0	0	0	0	0	0	0	0	0	0	0	0	0	0
CASSRNIATHCTEAFF	0.00373134	1	0	0	0	0	0	0		0	0	0	0	0	0	0	0	0	0	0	0	0	0	0	0	0	0	0	0	0	0	0	0	0	0	0	0	0	0	0	0	0	0	0	0	0	0	0	0
CASSQEHRVTYEQYF	0.00373134	1	0	0	0	0	0	0		0	0	0	0	0	0	0	0	0	0	0	0	0	0	0	0	0	0	0	0	0	0	0	0	0	0	0	0	0	0	0	0	0	0	0	0	0	0	0	0
CASSQEGPASGRAHEQFF	0.00373134	1	0	0	0	0	0	0		0	0	0	0	0	0	0	0	0	0	0	0	0	0	0	0	0	0	0	0	0	0	0	0	0	0	0	0	0	0	0	0	0	0	0	0	0	0	0	0
CASSQARVATLDEQFF	0.00373134	1	0	0	0	0	0	0		0	0	0	0	0	0	0	0	0	0	0	0	0	0	0	0	0	0	0	0	0	0	0	0	0	0	0	0	0	0	0	0	0	0	0	0	0	0	0	0
CASSPWTGGGDEQFF	0.00373134	1	0	0	0	0	0	0		0	0	0	0	0	0	0	0	0	0	0	0	0	0	0	0	0	0	0	0	0	0	0	0	0	0	0	0	0	0	0	0	0	0	0	0	0	0	0	0
CASSPPWGTYNEQFF	0.00373134	1	0	0	0	0	0	0		0	0	0	0	0	0	0	0	0	0	0	0	0	0	0	0	0	0	0	0	0	0	0	0	0	0	0	0	0	0	0	0	0	0	0	0	0	0	0	0
CASSPIEGAGTEAFF	0.00373134	1	0	0	0	0	0	0		0	0	0	0	0	0	0	0	0	0	0	0	0	0	0	0	0	0	0	0	0	0	0	0	0	0	0	0	0	0	0	0	0	0	0	0	0	0	0	0
CASSPGQGGFGETQYF	0.00373134	1	0	0	0	0	0	0		0	0	0	0	0	0	0	0	0	0	0	0	0	0	0	0	0	0	0	0	0	0	0	0	0	0	0	0	0	0	0	0	0	0	0	0	0	0	0	0
CASSMTRDRGAYEQYF	0.00373134	1	0	0	0	0	0	0		0	0	0	0	0	0	0	0	0	0	0	0	0	0	0	0	0	0	0	0	0	0	0	0	0	0	0	0	0	0	0	0	0	0	0	0	0	0	0	0
CASSMEPGGAYEQYF	0.00373134	1	0	0	0	0	0	0		0	0	0	0	0	0	0	0	0	0	0	0	0	0	0	0	0	0	0	0	0	0	0	0	0	0	0	0	0	0	0	0	0	0	0	0	0	0	0	0
CASSLYPGGGETEAFF	0.00373134	1	0	0	0	0	0	0		0	0	0	0	0	0	0	0	0	0	0	0	0	0	0	0	0	0	0	0	0	0	0	0	0	0	0	0	0	0	0	0	0	0	0	0	0	0	0	0
CASSLTSGRYEQYF	0.00373134	1	0	0	0	0	0	0		0	0	0	0	0	0	0	0	0	0	0	0	0	0	0	0	0	0	0	0	0	0	0	0	0	0	0	0	0	0	0	0	0	0	0	0	0	0	0	0
CASSLSNSYEQYF	0.00373134	1	0	0	0	0	0	0		0	0	0	0	0	0	0	0	0	0	0	0	0	0	0	0	0	0	0	0	0	0	0	0	0	0	0	0	0	0	0	0	0	0	0	0	0	0	0	0
CASSLRRSSSYNEQFF	0.00373134	1	0	0	0	0	0	0		0	0	0	0	0	0	0	0	0	0	0	0	0	0	0	0	0	0	0	0	0	0	0	0	0	0	0	0	0	0	0	0	0	0	0	0	0	0	0	0
CASSLQGVNEQFF	0.00373134	1	0	0	0	0	0	0		0	0	0	0	0	0	0	0	0	0	0	0	0	0	0	0	0	0	0	0	0	0	0	0	0	0	0	0	0	0	0	0	0	0	0	0	0	0	0	0
CASSLLRDMNTEAFF	0.00373134	1	0	0	0	0	0	0		0	0	0	0	0	0	0	0	0	0	0	0	0	0	0	0	0	0	0	0	0	0	0	0	0	0	0	0	0	0	0	0	0	0	0	0	0	0	0	0
CASSLIPSQETQYF	0.00373134	1	0	0	0	0	0	0		0	0	0	0	0	0	0	0	0	0	0	0	0	0	0	0	0	0	0	0	0	0	0	0	0	0	0	0	0	0	0	0	0	0	0	0	0	0	0	0
CASSLINGTSGGGPQETQYF	0.00373134	1	0	0	0	0	0	0		0	0	0	0	0	0	0	0	0	0	0	0	0	0	0	0	0	0	0	0	0	0	0	0	0	0	0	0	0	0	0	0	0	0	0	0	0	0	0	0
CASSLIGGKGETQYF	0.00373134	1	0	0	0	0	0	0		0	0	0	0	0	0	0	0	0	0	0	0	0	0	0	0	0	0	0	0	0	0	0	0	0	0	0	0	0	0	0	0	0	0	0	0	0	0	0	0
CASSLGTGGMTDTQYF	0.00373134	1	0	0	0	0	0	0		0	0	0	0	0	0	0	0	0	0	0	0	0	0	0	0	0	0	0	0	0	0	0	0	0	0	0	0	0	0	0	0	0	0	0	0	0	0	0	0
CASSLGTGFNYGYTF	0.00373134	1	0	0	0	0	0	0		0	0	0	0	0	0	0	0	0	0	0	0	0	0	0	0	0	0	0	0	0	0	0	0	0	0	0	0	0	0	0	0	0	0	0	0	0	0	0	0
CASSLGEALAGDEYGQYF	0.00373134	1	0	0	0	0	0	0		0	0	0	0	0	0	0	0	0	0	0	0	0	0	0	0	0	0	0	0	0	0	0	0	0	0	0	0	0	0	0	0	0	0	0	0	0	0	0	0
CASSLGEALAGDEYEQYF	0.00373134	1	0	0	0	0	0	0		0	0	0	0	0	0	0	0	0	0	0	0	0	0	0	0	0	0	0	0	0	0	0	0	0	0	0	0	0	0	0	0	0	0	0	0	0	0	0	0
CASSLERGQGRGNEKLFF	0.00373134	1	0	0	0	0	0	0		0	0	0	0	0	0	0	0	0	0	0	0	0	0	0	0	0	0	0	0	0	0	0	0	0	0	0	0	0	0	0	0	0	0	0	0	0	0	0	0
CASSLELAGDQETQYF	0.00373134	1	0	0	0	0	0	0		0	0	0	0	0	0	0	0	0	0	0	0	0	0	0	0	0	0	0	0	0	0	0	0	0	0	0	0	0	0	0	0	0	0	0	0	0	0	0	0
CASSLDQAQYNEQFF	0.00373134	1	0	0	0	0	0	0		0	0	0	0	0	0	0	0	0	0	0	0	0	0	0	0	0	0	0	0	0	0	0	0	0	0	0	0	0	0	0	0	0	0	0	0	0	0	0	0
CASSKTRDRGHEQYF	0.00373134	1	0	0	0	0	0	0		0	0	0	0	0	0	0	0	0	0	0	0	0	0	0	0	0	0	0	0	0	0	0	0	0	0	0	0	0	0	0	0	0	0	0	0	0	0	0	0
CASSHNTYATSGGAGETQYF	0.00373134	1	0	0	0	0	0	0		0	0	0	0	0	0	0	0	0	0	0	0	0	0	0	0	0	0	0	0	0	0	0	0	0	0	0	0	0	0	0	0	0	0	0	0	0	0	0	0
CASSHLQGYDEQFF	0.00373134	1	0	0	0	0	0	0		0	0	0	0	0	0	0	0	0	0	0	0	0	0	0	0	0	0	0	0	0	0	0	0	0	0	0	0	0	0	0	0	0	0	0	0	0	0	0	0
CASSGRPGQGNTDTQYF	0.00373134	1	0	0	0	0	0	0		0	0	0	0	0	0	0	0	0	0	0	0	0	0	0	0	0	0	0	0	0	0	0	0	0	0	0	0	0	0	0	0	0	0	0	0	0	0	0	0
CASSGPGASTDTQYF	0.00373134	1	0	0	0	0	0	0		0	0	0	0	0	0	0	0	0	0	0	0	0	0	0	0	0	0	0	0	0	0	0	0	0	0	0	0	0	0	0	0	0	0	0	0	0	0	0	0
CASSGKGLAGGETQYF	0.00373134	1	0	0	0	0	0	0		0	0	0	0	0	0	0	0	0	0	0	0	0	0	0	0	0	0	0	0	0	0	0	0	0	0	0	0	0	0	0	0	0	0	0	0	0	0	0	0
CASSGAGTGGNNSPLHF	0.00373134	1	0	0	0	0	0	0		0	0	0	0	0	0	0	0	0	0	0	0	0	0	0	0	0	0	0	0	0	0	0	0	0	0	0	0	0	0	0	0	0	0	0	0	0	0	0	0
CASSESGGGREQYF	0.00373134	1	0	0	0	0	0	0		0	0	0	0	0	0	0	0	0	0	0	0	0	0	0	0	0	0	0	0	0	0	0	0	0	0	0	0	0	0	0	0	0	0	0	0	0	0	0	0
CASSEQGLSGNTIYF	0.00373134	1	0	0	0	0	0	0		0	0	0	0	0	0	0	0	0	0	0	0	0	0	0	0	0	0	0	0	0	0	0	0	0	0	0	0	0	0	0	0	0	0	0	0	0	0	0	0
CASSELLAGGGETQYF	0.00373134	1	0	0	0	0	0	0		0	0	0	0	0	0	0	0	0	0	0	0	0	0	0	0	0	0	0	0	0	0	0	0	0	0	0	0	0	0	0	0	0	0	0	0	0	0	0	0
CASSEKWRANSYEQYF	0.00373134	1	0	0	0	0	0	0		0	0	0	0	0	0	0	0	0	0	0	0	0	0	0	0	0	0	0	0	0	0	0	0	0	0	0	0	0	0	0	0	0	0	0	0	0	0	0	0
CASSEALHAVRSYNEQFF	0.00373134	1	0	0	0	0	0	0		0	0	0	0	0	0	0	0	0	0	0	0	0	0	0	0	0	0	0	0	0	0	0	0	0	0	0	0	0	0	0	0	0	0	0	0	0	0	0	0
CASSDWDSLEAQYF	0.00373134	1	0	0	0	0	0	0		0	0	0	0	0	0	0	0	0	0	0	0	0	0	0	0	0	0	0	0	0	0	0	0	0	0	0	0	0	0	0	0	0	0	0	0	0	0	0	0
CASSAPSGSFNVYNEQFF	0.00373134	1	0	0	0	0	0	0		0	0	0	0	0	0	0	0	0	0	0	0	0	0	0	0	0	0	0	0	0	0	0	0	0	0	0	0	0	0	0	0	0	0	0	0	0	0	0	0
CASSAGQGYEQFF	0.00373134	1	0	0	0	0	0	0		0	0	0	0	0	0	0	0	0	0	0	0	0	0	0	0	0	0	0	0	0	0	0	0	0	0	0	0	0	0	0	0	0	0	0	0	0	0	0	0
CASRTGTESTDTQYF	0.00373134	1	0	0	0	0	0	0		0	0	0	0	0	0	0	0	0	0	0	0	0	0	0	0	0	0	0	0	0	0	0	0	0	0	0	0	0	0	0	0	0	0	0	0	0	0	0	0
CASRRRGQGGYEQFF	0.00373134	1	0	0	0	0	0	0		0	0	0	0	0	0	0	0	0	0	0	0	0	0	0	0	0	0	0	0	0	0	0	0	0	0	0	0	0	0	0	0	0	0	0	0	0	0	0	0
CASRGTGTLTDTQYF	0.00373134	1	0	0	0	0	0	0		0	0	0	0	0	0	0	0	0	0	0	0	0	0	0	0	0	0	0	0	0	0	0	0	0	0	0	0	0	0	0	0	0	0	0	0	0	0	0	0
CASRDTGVTEAFF	0.00373134	1	0	0	0	0	0	0		0	0	0	0	0	0	0	0	0	0	0	0	0	0	0	0	0	0	0	0	0	0	0	0	0	0	0	0	0	0	0	0	0	0	0	0	0	0	0	0
CASRDLGLATSYEQYF	0.00373134	1	0	0	0	0	0	0		0	0	0	0	0	0	0	0	0	0	0	0	0	0	0	0	0	0	0	0	0	0	0	0	0	0	0	0	0	0	0	0	0	0	0	0	0	0	0	0
CASPPGNAVSPYEQYF	0.00373134	1	0	0	0	0	0	0		0	0	0	0	0	0	0	0	0	0	0	0	0	0	0	0	0	0	0	0	0	0	0	0	0	0	0	0	0	0	0	0	0	0	0	0	0	0	0	0
CASNSGSGQGISGYTF	0.00373134	1	0	0	0	0	0	0		0	0	0	0	0	0	0	0	0	0	0	0	0	0	0	0	0	0	0	0	0	0	0	0	0	0	0	0	0	0	0	0	0	0	0	0	0	0	0	0
CASGTGVNEKLFF	0.00373134	1	0	0	0	0	0	0		0	0	0	0	0	0	0	0	0	0	0	0	0	0	0	0	0	0	0	0	0	0	0	0	0	0	0	0	0	0	0	0	0	0	0	0	0	0	0	0
CASGITAAGQSRANVLTF	0.00373134	1	0	0	0	0	0	0		0	0	0	0	0	0	0	0	0	0	0	0	0	0	0	0	0	0	0	0	0	0	0	0	0	0	0	0	0	0	0	0	0	0	0	0	0	0	0	0
CSVDSVF	0.0214778	2	0	0	0	0	0	0		0	0	0	0	0	0	0	0	0	0	0	0	0	0	0	0	0	0	0	0	0	0	0	0	0	0	0	0	0	0	0	0	0	0	0	0	0	0	0	0
CASSSYISMRKTYGY	0.0183486	1	0	0	0	0	0	0		0	0	0	0	0	0	0	0	0	0	0	0	0	0	0	0	0	0	0	0	0	0	0	0	0	0	0	0	0	0	0	0	0	0	0	0	0	0	0	0
CSARWTGGTDTQYF	0.131689	28	0	0	6.7e-06	0	0	0		0	0	0	0	0.00359856	0	0.002849	0	0.0021692	0	0.00214293	0.00178021	0	0.00877193	0	0	0.0031021	0.0194518	0.00308642	0.00446429	0	0	0.00144819	0.0151411	0	0.00103734	0	0	0	0.00168785	0	0	0	0.00246914	0	0.00704225	0	0.0083077	0.00203838	0
CASSLFPTLPPLNTEAFF	0.328818	50	0.00016353	9.885e-05	0.00010046	5.72e-05	4.91304e-05	0.0001855		0	0.00434783	0.00549451	0.00440529	0.00357952	0.00327411	0.002849	0.00675676	0	0.00343643	0.00892888	0.0026486	0	0.00584795	0.00442478	0	0.00194307	0.00134468	0.00308642	0	0	0	0.00355464	0.00515542	0	0	0	0.00784314	0.00106514	0.00513539	0.0033807	0.00615289	0.00807077	0.00493827	0.0184332	0.00704225	0.00735294	0.0232108	0.0199126	0
CASAGGAQETQYF	0.0773764	30	0	5.81e-06	0	8.17e-06	0	1.68636e-05		0	0	0	0.00440529	0.00032368	0.00120954	0.00854701	0.00675676	0	0	0.00610565	0.00217099	0	0	0	0	0.0001534	0.00033156	0	0	0	0	5.642e-05	6.967e-05	0	0	0	0	0	0.0004489	0.00042402	0.00014755	0.00091442	0	0.00460829	0	0	0.00291721	0.00321099	0
CASSYSPPSGVYNEQFF	0.0178648	29	0.00012265	7.559e-05	8.037e-05	9.806e-05	1.22826e-05	5.6212e-06		0	0	0	0	0.00053312	8.342e-05	0	0	0	0	0.00018708	0.00015197	0	0	0	0	0.00025567	0.00014736	0	0	0	0	0.00015046	0.0001045	0	0	0	0.00392157	6.266e-05	7.182e-05	6.876e-05	5.902e-05	7.951e-05	0	0	0	0	7.927e-05	0.00014247	0
CSAVGTAQETQYF	0.027679	28	3.066e-05	2.326e-05	2.679e-05	2.452e-05	1.22826e-05	1.12424e-05		0	0	0	0	0.0003808	0.00058392	0.002849	0	0	0	0.00212592	0	0	0	0	0	5.113e-05	0.00011052	0	0	0	0	5.642e-05	5.806e-05	0	0	0	0	0.00025062	3.591e-05	0.00018336	0.0001328	0.0022463	0	0.00460829	0	0	0.00031709	0.00158906	0
CASSFRVDTDTQYF	0.0242607	27	0	1.744e-05	1.339e-05	8.17e-06	1.22826e-05	0		0	0	0	0	0	0.0001147	0	0	0	0	0.00035716	0	0	0	0	0	3.409e-05	3.684e-05	0	0	0	0	0.00050781	3.483e-05	0	0	0	0	4.177e-05	0.00120305	8.022e-05	2.951e-05	3.976e-05	0.00246914	0	0	0	0.00022196	0.00096439	0
CATSKGINTEAFF	0.0188798	25	1.022e-05	1.744e-05	1.339e-05	2.452e-05	0	0		0	0	0	0	0.00097104	0.00040666	0	0	0	0	1.701e-05	0.00015197	0	0	0	0	0.00010227	0.00160256	0	0	0	0	1.881e-05	6.967e-05	0	0	0	0	0	0.00019751	0.00021774	0	0.001312	0	0	0	0	1.585e-05	0.00155618	0
CASSHQGTEGYTF	0.0100557	25	7.155e-05	2.907e-05	5.358e-05	9.806e-05	1.22826e-05	1.12424e-05		0	0	0	0	1.904e-05	1.043e-05	0	0	0	0	1.701e-05	6.513e-05	0	0	0	0	5.113e-05	1.842e-05	0	0	0	0	0	2.322e-05	0	0	0	0	2.089e-05	1.796e-05	3.438e-05	2.951e-05	9.939e-05	0	0	0	0	3.171e-05	1.096e-05	0
CASSLGGVYEQYF	0.0118121	24	1.022e-05	5.81e-06	2.009e-05	8.17e-06	3.68478e-05	6.18332e-05		0	0	0	0	1.904e-05	6.256e-05	0	0	0	0	0.00035716	6.513e-05	0	0	0	0	8.522e-05	0	0	0	0	0	0.00035734	2.322e-05	0	0	0	0	2.089e-05	0	0.00010314	8.853e-05	0.00023854	0	0	0	0	0.00012684	1.096e-05	0
CASSSPARNTEAFF	0.00974889	21	5.11e-05	3.489e-05	5.358e-05	4.903e-05	2.45652e-05	0		0	0	0	0	1.904e-05	1.043e-05	0	0	0	0	1.701e-05	0	0	0	0	0	0	0	0	0	0	0	3.762e-05	1.161e-05	0	0	0	0	6.266e-05	1.796e-05	4.584e-05	0	3.976e-05	0	0	0	0	0	2.192e-05	0
CASSSTSASYEQYF	0.0121953	17	0	5.81e-06	0	0	0	0		0	0	0	0	7.616e-05	0	0	0	0	0	0	0	0	0	0	0	0.00018749	0.00011052	0	0	0	0	0.00022569	0	0	0	0	0	2.089e-05	1.796e-05	0.00073344	0.00070825	0	0	0	0	0	0	2.192e-05	0
CASSGTSAGEQFF	0.00948152	17	0	1.744e-05	6.7e-06	2.452e-05	0	5.6212e-06		0	0	0	0	1.904e-05	2.085e-05	0	0	0	0	0	4.342e-05	0	0	0	0	0	1.842e-05	0	0	0	0	1.881e-05	1.161e-05	0	0	0	0	2.089e-05	3.591e-05	1.146e-05	0	0	0	0	0	0	0	1.096e-05	0
CASREAGRDEQFF	0.0168375	17	0	0	0	0	0	0		0	0	0	0	5.712e-05	0.00012513	0	0	0	0	0	0.0002171	0	0	0	0	3.409e-05	0	0	0	0	0	0	0	0	0	0	0	2.089e-05	0.00012569	0.00247536	0.00026559	0	0	0	0	0	0.00066588	0.0004822	0
CASSQELAGGYNEQFF	0.0102365	15	3.066e-05	0	0	0	0	1.68636e-05		0	0	0	0	0	1.043e-05	0	0	0	0	0	2.171e-05	0	0	0	0	0	1.842e-05	0	0	0	0	0	0	0	0	0	0	2.089e-05	0	1.146e-05	0	0	0	0	0	0	3.171e-05	0	0
CASSIGRESYNEQFF	0.012595	15	1.022e-05	0	0	0	1.22826e-05	5.6212e-06		0	0	0	0	0	0	0	0	0	0	0	0.00034736	0	0	0	0	5.113e-05	3.684e-05	0	0	0	0	0	0	0	0	0	0	0.00033416	1.796e-05	0.00019482	1.476e-05	0	0	0	0	0	1.585e-05	0.00064658	0
CSARQGAGGAFF	0.00963345	12	0	5.81e-06	6.7e-06	0	0	0		0	0	0	0	1.904e-05	2.085e-05	0	0	0	0	1.701e-05	8.684e-05	0	0	0	0	0	0	0	0	0	0	0.00018808	2.322e-05	0	0	0	0	0	0	2.292e-05	0	0	0	0	0	0	1.585e-05	0	0
CASGLWGRVNTEAFF	0.0507362	12	0	5.81e-06	6.7e-06	0	0	0		0	0	0	0	0	1.043e-05	0	0	0	0	1.701e-05	0	0	0	0	0	5.113e-05	0	0	0	0	0	0	0	0	0	0	0	0	1.796e-05	0	0	1.988e-05	0	0	0	0	0	1.096e-05	0
CASSVEWRPSIDTQYF	0.0198521	11	0	5.81e-06	6.7e-06	1.634e-05	0	0		0	0	0	0	0	0	0	0	0	0	0	0	0	0	0	0	1.704e-05	0	0.00308642	0.00446429	0	0	0	0	0	0	0	0	0	1.796e-05	0	0	0	0	0	0	0	0	1.096e-05	0
CSALAGTTKKNEQFF	0.00929015	10	0	5.81e-06	6.7e-06	0	0	0		0	0	0	0	0	1.043e-05	0	0	0	0	0	2.171e-05	0	0	0	0	0	0	0	0	0	0	1.881e-05	1.161e-05	0	0	0	0	0	1.796e-05	0	0	0	0	0	0	0	0	1.096e-05	0
CASSQLAGSGANVLTF	0.0388737	9	1.022e-05	0	6.7e-06	8.17e-06	0	0		0	0	0	0	0	0	0	0	0	0	0	0	0	0	0	0	0	0	0	0	0	0	0	0	0	0	0	0	0	0	0	0	0	0	0	0	0	0	0	0
CASSPGQGNSPLHF	0.00942114	9	0	0	6.7e-06	1.634e-05	1.22826e-05	0		0	0	0	0	0	0	0	0	0	0	0	0.00010855	0	0	0	0	0	0	0	0	0	0	0	0	0	0	0	0	0	1.796e-05	0	0	1.988e-05	0	0	0	0	0	1.096e-05	0
CASSGGGGSGTEAFF	0.00927051	9	0	5.81e-06	6.7e-06	8.17e-06	0	0		0	0	0	0	0	0	0	0	0	0	0	0	0	0	0	0	0	0	0	0	0	0	1.881e-05	0	0	0	0	0	0	0	0	1.476e-05	0	0	0	0	0	0	0	0
CASGGLPYEQYF	0.0118547	9	0	0	0	0	0	0		0	0	0	0	0	0	0	0	0	0	0	0	0	0	0	0	0	0	0	0	0	0	0	0	0	0	0	0	2.089e-05	5.387e-05	2.292e-05	0	0	0	0	0	0	0	1.096e-05	0
CATSDTGTSGSWSYNEQFF	0.0092842	8	1.022e-05	5.81e-06	6.7e-06	0	1.22826e-05	0		0	0	0	0	0	0	0	0	0	0	0	0	0	0	0	0	0	3.684e-05	0	0	0	0	0	0	0	0	0	0	0	0	0	0	0	0	0	0	0	0	1.096e-05	0
CASSPQLPTSGNTIYF	0.00928544	7	2.044e-05	1.163e-05	0	0	0	0		0	0	0	0	0	1.043e-05	0	0	0	0	0	0	0	0	0	0	1.704e-05	0	0	0	0	0	0	0	0	0	0	0	0	0	0	0	1.988e-05	0	0	0	0	3.171e-05	0	0
CASSHPGGQGTEGYTF	0.00927237	7	1.022e-05	0	6.7e-06	0	0	0		0	0	0	0	0	1.043e-05	0	0	0	0	0	0	0	0	0	0	0	0	0	0	0	0	0	0	0	0	0	0	0	0	0	0	1.988e-05	0	0	0	0	0	0	0
CSVGTELSTGELFF	0.0369007	6	0	0	0	0	0	0		0	0	0.00274725	0.00881057	0.00024752	0	0	0	0	0	0	0	0	0	0	0	0	0	0	0	0	0	0	0	0	0	0	0	0	0	0	0	0	0	0	0	0	0	0	0
CASSLGLGGQGSPLHF	0.0169568	6	0	5.81e-06	0	8.17e-06	0	5.6212e-06		0	0	0	0	0	0	0	0	0	0	0	0	0	0	0	0	0	0	0	0	0	0	0	0	0	0	0	0	0	0	0	0	0	0	0	0	0	0	0	0
CASSEVGEGGSGANVLTF	0.00939336	6	0	0	6.7e-06	0	0	0		0	0	0	0	0	0	0	0	0	0	0	0	0	0	0	0	0	0	0	0	0	0	0	0	0	0	0	0	0	0	0	0	0	0	0	0	0	1.585e-05	0	0
CASRPGSEQFF	0.0331689	6	0	0	0	0	0	0		0	0	0	0	0	0	0	0	0	0	0	0	0	0	0	0	0	0	0	0.00446429	0	0	0	0.00993927	0	0	0	0	0	0	0	0	0	0	0	0	0	0	0.00112878	0
CASSQLAKGASEQFF	0.0173408	5	0	0	6.7e-06	0	0	0		0	0	0	0	0	0	0	0	0	0	0	0	0	0	0	0	0	0	0	0	0	0	0	0	0	0	0	0	0	0	0	0	0	0	0	0	0	0	0	0
CASSQELAGHHEQFF	0.00922113	5	0	5.81e-06	0	0	0	0		0	0	0	0	0	0	0	0	0	0	0	0	0	0	0	0	0	0	0	0	0	0	0	0	0	0	0	0	0	0	0	0	0	0	0	0	0	0	0	0
CASSLRPQETQYF	0.00922035	5	0	1.163e-05	6.7e-06	0	0	0		0	0	0	0	0	0	0	0	0	0	0	0	0	0	0	0	0	0	0	0	0	0	0	0	0	0	0	0	0	0	0	0	0	0	0	0	0	1.585e-05	0	0
CASSADRGTEAFF	0.00922937	5	0	0	0	8.17e-06	0	0		0	0	0	0	0	0	0	0	0	0	1.701e-05	0	0	0	0	0	0	1.842e-05	0	0	0	0	0	0	0	0	0	0	0	0	1.146e-05	0	0	0	0	0	0	0	0	0
CAGFGQGQNIQYF	0.0105828	5	0	5.81e-06	0	8.17e-06	0	0		0	0	0	0	0	0	0	0	0	0	0	0	0	0	0	0	0	0	0	0	0	0	0	0	0	0	0	0	0	0	0	0	0	0	0	0	0	0	0	0
CASSQWGETRSGANVLTF	0.0092076	4	0	0	6.7e-06	8.17e-06	0	0		0	0	0	0	0	0	0	0	0	0	0	0	0	0	0	0	0	1.842e-05	0	0	0	0	0	0	0	0	0	0	0	0	0	0	0	0	0	0	0	0	0	0
CASSPGDEQFF	0.00938501	4	1.022e-05	0	1.339e-05	0	0	0		0	0	0	0	0	0	0	0	0	0	0.00018708	0	0	0	0	0	0	0	0	0	0	0	0	0	0	0	0	0	0	0	0	0	0	0	0	0	0	0	0	0
CASSPFLAKNIQYF	0.0225024	4	0	0	0	0	0	0		0	0	0	0	0	0	0	0	0	0	0	0	0	0	0	0	0	0	0	0	0	0	0	0	0	0	0	0	0	0	1.146e-05	0	0	0	0	0	0	0	0	0
CASSEGQSLYNEQFF	0.0175607	4	0	0	0	0	0	0		0	0	0	0	0	0	0	0.00675676	0	0	0	0	0	0	0	0	0	0	0	0	0	0	1.881e-05	0	0	0	0	0	0	0	0	0	0	0	0	0	0	0	0	0
CASSFGQGRGEQYF	0.0114423	3	1.022e-05	0	0	0	0	0		0	0	0	0	0	0	0	0	0	0	0	0	0	0	0	0	0	0	0	0	0	0	0	0	0	0	0	0	0	0	0	0	0	0	0	0	0	0	0	0
CASSAPGRAVTDTQYF	0.0103792	3	0	0	0	0	0	0		0	0	0	0	0	0	0	0	0	0	0	0	0	0	0	0	0	0	0	0	0	0	0	0	0	0	0	0	0	0	0	0	0	0	0	0	0	0	0	0
CASSAGTPSYNEQFF	0.0132116	3	1.022e-05	0	0	0	0	0		0	0	0	0	0	0	0	0	0	0	0	0	0	0	0	0	0	0	0	0	0	0	0	0	0	0	0	0	0	0	0	0	0	0	0	0	0	0	0	0
CASSAEGYEQYF	0.0157365	3	0	0	0	0	0	0		0	0	0	0	0	0	0	0	0	0	0	0	0	0	0	0	0	0	0	0	0	0	0	0	0	0	0	0	0	0	0	0	1.988e-05	0	0	0	0	0	0	0
CASRGIWARRWHEQYF	0.0134133	3	0	0	0	0	0	0		0	0	0	0	0	0	0	0	0	0	0	0	0	0	0	0	0	0	0	0	0	0	0	0	0	0	0	0	0	0	0	0	0	0	0	0	0	0	0	0
CASNRSYEQYF	0.0294128	3	0	0	0	0	0	0		0	0	0	0	0	0	0	0	0	0	0	0	0	0	0	0	0	0	0	0	0	0	0	0	0	0	0	0	0	0	0	0	0	0	0	0	0	0	0	0
CSASNSGNTIYF	0.00968	2	0	0	0	0	0	0		0	0	0	0	0	0	0	0	0	0	0	0	0	0	0	0	0	0	0	0	0	0	0	0	0	0	0	0	0	0	0	0	0	0	0	0	0	0	0	0
CSAKRSVTGELFF	0.00923752	2	0	0	0	0	0	0		0	0	0	0	0	0	0	0	0	0	0	0	0	0	0	0	0	0	0	0	0	0	0	0	0	0	0	0	0	0	0	0	0	0	0	0	0	0	0	0
CASSVARAGTTDTQYF	0.00922172	2	0	0	0	0	0	0		0	0	0	0	0	0	0	0	0	0	0	0	0	0	0	0	0	0	0	0	0	0	0	0	0	0	0	0	0	0	0	0	0	0	0	0	0	0	0	0
CASSSGRRHSNQPQHF	0.00918594	2	0	1.163e-05	0	0	0	0		0	0	0	0	0	0	0	0	0	0	0	0	0	0	0	0	0	0	0	0	0	0	0	0	0	0	0	0	0	0	0	0	0	0	0	0	0	0	0	0
CASSQGYSDTQYF	0.00918907	2	0	0	0	0	0	0		0	0	0	0	0	0	0	0	0	0	0	0	0	0	0	0	0	0	0	0	0	0	0	0	0	0	0	0	0	0	0	1.476e-05	0	0	0	0	0	0	0	0
CASSPLGGGTGIQYF	0.00947456	2	0	0	0	0	0	0		0	0	0	0	0	0	0	0	0	0	0	0	0	0	0	0	0	0	0	0	0	0	0	0	0	0	0	0	0	0	0	0	0	0	0	0	0	0	0	0
CAIKMDRAYNEQFF	0.00939877	2	0	0	0	0	0	0		0	0	0	0	0	0	0	0	0	0	0	0	0	0	0	0	0	0	0	0	0	0	0	0	0	0	0	0	0	0	0	0	0	0	0	0	0	0	0	0
CSASGGVYQPQHF	0.00917431	1	0	0	0	0	0	0		0	0	0	0	0	0	0	0	0	0	0	0	0	0	0	0	0	0	0	0	0	0	0	0	0	0	0	0	0	0	0	0	0	0	0	0	0	0	0	0
CSARVGAGQPQHF	0.00917431	1	0	0	0	0	0	0		0	0	0	0	0	0	0	0	0	0	0	0	0	0	0	0	0	0	0	0	0	0	0	0	0	0	0	0	0	0	0	0	0	0	0	0	0	0	0	0
[truncated: 16,614 more rows]
[truncated: 36 more columns]
